# Supplementary material for: Potential mechanism of the AgNCs-hydrogel in promoting the regeneration of diabetic infectious wounds
Source: Royal Society of Chemistry journal article supplement (doi:10.1039/d3an01569f), 2023-01-01
Supplement: d3an01569f2.xlsx [file d3an01569f2.xlsx]

## Sheet: Table S2
Table S2. Differently expressed proteins.
										Average			SD			Ratio			P (t test)
Proteins	Con1	Con2	Con3	Gel1	Gel2	Gel3	PBS1	PBS2	PBS3	Con	Gel	PBS	Con	Gel	PBS	Gel/Con	PBS/Con	Gel/PBS	Gel/Con	PBS/Con	Gel/PBS
Q61805	0.153316	0.155862	0.177208	1.75695	1.35785	1.47001	0.529964	0.753046	0.639316	0.162129	1.52827	0.640776	0.0131213	0.205827	0.111548	9.42626	3.95226	2.38503	0.000329439	0.00179589	0.0027835
A0A571BF69	0.163049	0.157784	0.104807	1.98187	1.41302	1.97275	0.412261	0.678503	0.753914	0.14188	1.78921	0.614893	0.0322139	0.325822	0.179489	12.6108	4.33389	2.9098	0.000954904	0.010883	0.00544198
P35441	0.307854	0.333011	0.306558	6.15187	3.88849	5.56845	1.45387	1.68777	2.00374	0.315807	5.20294	1.71513	0.0149125	1.17512	0.275953	16.475	5.43092	3.03356	0.00196934	0.00093192	0.0074658
Q91WP0	0.48455	0.307172	0.504629	3.50883	2.40271	3.11093	1.13489	0.889801	1.48551	0.432117	3.00749	1.17007	0.108671	0.560269	0.299409	6.9599	2.70776	2.57036	0.00144625	0.015959	0.0074386
Q00612	0.770051	0.672341	0.655967	3.8521	2.19396	3.45098	1.57842	1.11609	1.79135	0.699453	3.16568	1.49529	0.0616853	0.865104	0.345218	4.52593	2.13779	2.11711	0.00789992	0.0170937	0.0360054
A0A0A6YXW6	2.67524	1.8509	1.81751	10.4867	14.6252	11.15	4.7621	4.09168	6.91747	2.11455	12.0873	5.25709	0.48586	2.22281	1.47649	5.71625	2.48615	2.29924	0.00161494	0.0248567	0.0113928
Q08761	0.232775	0.185552	0.130304	0.717375	0.963547	0.599462	0.312264	0.283174	0.417114	0.182877	0.760128	0.337518	0.0512877	0.18577	0.0704505	4.1565	1.8456	2.25211	0.00657009	0.0371598	0.0211253
P62482	0.235381	0.305174	0.206641	0.741439	0.708258	0.546265	0.318222	0.294113	0.333871	0.249065	0.665321	0.315402	0.0506715	0.104431	0.0200287	2.67127	1.26634	2.10944	0.00341881	0.102634	0.00468257
Q9JLV6	0.260493	0.200525	0.325568	1.87701	1.01528	1.48623	0.389944	0.508782	0.549005	0.262195	1.45951	0.482577	0.0625388	0.431484	0.082705	5.56648	1.84052	3.0244	0.00892808	0.0211789	0.01828
Q8R5A3	0.309166	0.389298	0.247366	1.27797	0.710286	1.2527	0.395364	0.431461	0.497261	0.315277	1.08032	0.441362	0.0711631	0.320706	0.0516652	3.42657	1.39992	2.44769	0.0156857	0.0679666	0.0271043
Q8C4B4	0.309532	0.363028	0.398042	0.999343	0.60163	0.845559	0.3068	0.364293	0.344252	0.356867	0.815511	0.338448	0.0445759	0.200552	0.0291825	2.28519	0.948387	2.40956	0.0180445	0.581575	0.0151336
Q571E4	0.318719	0.271888	0.330546	1.05883	0.6404	1.02318	0.347147	0.443095	0.446472	0.307051	0.907468	0.412238	0.0310206	0.231974	0.056396	2.95543	1.34257	2.20132	0.0113032	0.0473165	0.0229001
P28867	0.338201	0.265428	0.257294	1.04322	0.614721	1.10617	0.452416	0.345465	0.394912	0.286975	0.92137	0.397598	0.0445497	0.267425	0.053526	3.21063	1.38548	2.31734	0.0154377	0.0513024	0.0292041
Q6DTY7	0.360874	0.47138	0.45885	1.95299	1.3295	1.71541	0.542593	0.588587	0.669292	0.430368	1.66597	0.600157	0.0605087	0.31467	0.0641372	3.87103	1.39452	2.77589	0.00261266	0.0289645	0.00454002
Q3UZ39	0.397991	0.249576	0.295664	0.651833	0.719686	0.609493	0.32687	0.2341	0.41921	0.31441	0.660337	0.326727	0.0759629	0.0555866	0.0925554	2.10024	1.03917	2.02107	0.00312306	0.867253	0.00587762
P08103	0.489644	0.371374	0.376957	1.32724	0.73001	1.12545	0.450277	0.485655	0.398166	0.412659	1.0609	0.444699	0.0667296	0.303802	0.0440102	2.57089	1.07764	2.38565	0.0225621	0.525732	0.0254256
P29351	0.509838	0.384117	0.445121	1.70684	1.02638	1.54418	0.519326	0.544378	0.680481	0.446359	1.4258	0.581395	0.0628699	0.35534	0.0867205	3.1943	1.30253	2.45238	0.00930058	0.0943646	0.0161492
Q9Z0P5	0.621516	0.591355	0.666877	2.04929	1.17047	1.71138	0.667654	0.626765	0.709775	0.626582	1.64372	0.668064	0.038015	0.443299	0.0415063	2.6233	1.0662	2.46041	0.0166834	0.270841	0.0191787
Q61599	0.786927	0.69137	0.829668	4.97539	2.756	4.61578	1.39339	1.07586	1.42219	0.769322	4.11572	1.29715	0.0708099	1.1912	0.192178	5.34981	1.68609	3.1729	0.00829598	0.0111276	0.015527
P47791	0.832394	0.735253	0.816617	4.24683	2.54458	4.07215	1.11735	1.01217	1.16967	0.794755	3.62119	1.09973	0.0521304	0.936447	0.0802133	4.55635	1.38374	3.29279	0.00642888	0.00525289	0.0096856
O35639	0.962893	0.813592	0.58934	2.38849	1.38894	2.21203	0.641376	0.641822	0.766222	0.788608	1.99648	0.68314	0.188026	0.533497	0.0719514	2.53165	0.86626	2.92251	0.0208628	0.415526	0.0134168
P24527	0.971761	0.954931	0.979448	3.79061	2.07474	3.38869	1.15656	0.930824	1.21391	0.968713	3.08468	1.10043	0.0125397	0.897423	0.14966	3.18431	1.13598	2.80315	0.0150554	0.203355	0.019478
Q9D154	0.995952	0.967665	1.10898	4.91897	2.70643	3.86656	1.65551	1.74506	1.81944	1.0242	3.83066	1.74	0.0747735	1.10671	0.0820787	3.74015	1.69889	2.20152	0.0118542	0.00036614	0.0309928
P59108	1.12988	0.689115	0.864847	3.16866	2.35138	2.83364	1.16596	1.47945	1.31074	0.894613	2.78456	1.31872	0.221883	0.410844	0.156896	3.11259	1.47407	2.11156	0.0021797	0.0539195	0.00446973
Q61147	1.20729	0.915765	0.788861	3.27039	5.15993	3.09679	1.39525	1.93907	1.93545	0.970639	3.84237	1.75659	0.214544	1.14434	0.312935	3.9586	1.80972	2.18741	0.0129278	0.0230054	0.0382072
Q8BT60	1.22716	1.0496	1.13009	3.77661	2.05537	3.44653	1.18131	1.28242	1.28187	1.13562	3.09283	1.24853	0.0889062	0.913507	0.058218	2.72348	1.09943	2.47718	0.020954	0.139547	0.0251273
Q9DCD0	1.28899	1.18525	1.09168	6.13253	3.5193	5.34096	2.32667	1.85924	2.55337	1.18864	4.9976	2.24643	0.0986998	1.34002	0.353952	4.20447	1.88992	2.22469	0.00798655	0.00756491	0.0263391
Q05144	1.31018	1.47224	1.37518	5.32578	3.09756	5.14854	1.92059	1.63165	1.98084	1.38587	4.52396	1.84436	0.0815533	1.23847	0.186662	3.26435	1.33084	2.45286	0.0118819	0.0175627	0.0207325
Q61233	1.43669	1.1667	1.28617	5.5321	3.01576	5.08722	1.73714	1.60688	2.09183	1.29652	4.54502	1.81195	0.135289	1.34294	0.250981	3.50556	1.39755	2.50836	0.0140464	0.0351478	0.0257005
D3YXF5	1.48117	1.00361	0.84596	2.72558	3.0537	2.5629	1.09476	1.40405	1.37982	1.11025	2.78072	1.29288	0.330759	0.250008	0.171997	2.5046	1.16449	2.15081	0.00221766	0.443961	0.00105428
P10107	1.62	1.58417	1.57855	6.37282	3.55728	5.78246	2.17251	2.05333	2.26314	1.59424	5.23752	2.16299	0.0224849	1.48477	0.105226	3.28528	1.35675	2.42142	0.0131625	0.000790156	0.0232172
P40142	1.99344	1.90503	2.0674	6.15037	3.96609	5.67034	2.52432	2.18359	2.66017	1.98862	5.26227	2.45603	0.0812915	1.14789	0.245521	2.64619	1.23504	2.14259	0.00788833	0.0351777	0.0143686
P50543	2.98315	2.59967	2.50553	6.35906	5.19086	7.08612	2.22467	2.44698	3.61461	2.69612	6.21201	2.76209	0.252992	0.956149	0.746625	2.30406	1.02447	2.24903	0.0035309	0.891762	0.00789731
Q8K0D2	3.24295	3.43835	2.92816	12.3502	6.65743	10.9197	3.66162	2.81216	4.48892	3.20315	9.97576	3.65423	0.257416	2.96143	0.838407	3.11435	1.14082	2.72992	0.0168715	0.423361	0.02364
C0HKE1	7.55563	5.8868	5.45771	17.8736	11.6813	14.1469	3.68321	3.79565	5.07147	6.30005	14.5673	4.18344	1.10833	3.11748	0.771107	2.31225	0.664034	3.48213	0.0123707	0.0532488	0.00499083
P84228	7.77931	5.7965	5.84121	20.9442	12.4822	16.399	5.22634	5.35398	5.58704	6.47234	16.6085	5.38912	1.13209	4.23492	0.1829	2.56607	0.832639	3.08185	0.0160636	0.177167	0.01015
P62806	8.6383	5.71472	8.40133	21.4167	17.0312	15.6654	3.34279	5.87868	4.3946	7.58479	18.0378	4.53869	1.62385	3.00489	1.27407	2.37815	0.598394	3.97422	0.00608421	0.0628917	0.00200998
Q9QZL0	0.175275	0.147193	0.128325	0.656055	0.453573	0.395105	0.397854	0.406249	0.440194	0.150264	0.501577	0.414766	0.0236254	0.136938	0.0224184	3.33797	2.76024	1.2093	0.0118855	0.000148227	0.339489
Q62351	0.180258	0.244731	0.233907	0.418835	0.527523	0.438912	0.388842	0.589375	0.43744	0.219632	0.461757	0.471886	0.0345258	0.0578333	0.10461	2.10241	2.14853	0.978535	0.00338852	0.0165915	0.890413
P97311	0.21367	0.137176	0.215347	0.616245	0.525672	0.523747	0.556103	0.353069	0.41317	0.188731	0.555222	0.44078	0.0446555	0.0528571	0.104295	2.94187	2.3355	1.25963	0.000784004	0.0183345	0.16527
Q923B6	0.216301	0.276477	0.222802	0.666809	0.551551	0.695422	0.455574	0.700006	0.679063	0.238527	0.637927	0.611548	0.0330264	0.0761603	0.135482	2.67445	2.56385	1.04314	0.00113311	0.00978405	0.783398
P57784	0.233304	0.288913	0.285902	0.791326	0.567545	0.834701	0.585428	0.530507	0.54456	0.269373	0.73119	0.553498	0.0312728	0.143371	0.0285309	2.71442	2.05477	1.32103	0.00550284	0.000312909	0.103024
P03958	0.239822	0.223845	0.292597	1.24165	0.68687	1.13124	0.770117	0.519092	0.894742	0.252088	1.01992	0.727983	0.0359799	0.293665	0.191336	4.04588	2.88781	1.40102	0.0108633	0.0133296	0.222588
Q8CFX1	0.26335	0.335086	0.221135	0.52878	0.565217	0.633822	0.61861	0.658653	0.657678	0.27319	0.57594	0.64498	0.0576093	0.0533356	0.0228428	2.1082	2.36092	0.892957	0.00261198	0.000484365	0.108331
O35704	0.283955	0.173978	0.191035	0.447658	0.404502	0.456101	0.570593	0.450394	0.595544	0.216323	0.436087	0.538844	0.0591886	0.0276773	0.077609	2.01591	2.49093	0.809301	0.00432475	0.00461258	0.0968845
O08739	0.314506	0.317582	0.228682	0.994045	0.968885	0.809133	0.470041	0.753139	0.573909	0.286924	0.924021	0.59903	0.0504617	0.100288	0.143211	3.22044	2.08777	1.54253	0.000600788	0.023582	0.0322922
P24472	0.319347	0.317673	0.333595	1.88236	3.08882	1.94078	2.14635	2.25639	1.83158	0.323538	2.30399	2.07811	0.00874957	0.680312	0.220474	7.12123	6.42307	1.1087	0.00727317	0.000161031	0.613417
O09172	0.325677	0.217961	0.213561	0.789032	0.629853	0.914834	0.689989	0.584326	0.896833	0.2524	0.777906	0.723716	0.0634981	0.142816	0.15896	3.08204	2.86734	1.07488	0.00433011	0.00884592	0.68318
Q3V3R1	0.326791	0.312888	0.384921	0.851086	0.655064	0.781209	0.746332	0.723	0.738356	0.341533	0.762453	0.735896	0.0382125	0.099348	0.0118593	2.23244	2.15468	1.03609	0.00237826	6.90479e-05	0.669582
O88947	0.333292	0.225171	0.219012	1.69047	1.19441	1.40087	0.786088	1.25884	1.24647	0.259158	1.42858	1.09713	0.0642753	0.249186	0.269444	5.51239	4.23345	1.30211	0.00140836	0.00634163	0.192807
Q9JJN5	0.333389	0.264082	0.185347	1.53012	1.33046	1.40513	0.740417	0.998099	1.03337	0.260939	1.4219	0.923962	0.0740709	0.100882	0.15993	5.44917	3.54091	1.53892	8.77579e-05	0.0028643	0.0103301
P27046	0.378878	0.282408	0.240723	0.752783	0.5171	0.636252	0.609242	0.677367	0.624942	0.30067	0.635378	0.637183	0.0708649	0.117844	0.0356743	2.11321	2.11921	0.997167	0.0135218	0.00182807	0.980956
P06684	0.383698	0.296481	0.261953	1.32489	1.09898	1.08104	0.925127	1.12131	1.24619	0.314044	1.16831	1.09754	0.0627442	0.135904	0.161844	3.72021	3.49486	1.06448	0.000587808	0.00144485	0.593026
Q61166	0.400536	0.468315	0.566664	1.13565	0.718951	1.02355	1.11213	0.972873	1.06309	0.478505	0.959386	1.04936	0.0835313	0.215635	0.0706348	2.00496	2.19301	0.914254	0.0227218	0.000830064	0.529938
Q9Z100	0.40819	0.394037	0.299501	1.24285	1.10523	1.39847	0.904233	1.26969	1.08342	0.367243	1.24885	1.08578	0.0590913	0.146712	0.18274	3.40062	2.95657	1.15019	0.000643879	0.00292311	0.294527
P34928	0.411885	0.368988	0.277256	1.7825	1.66849	1.42517	1.67115	2.11671	2.8175	0.35271	1.62539	2.20179	0.0687748	0.182525	0.57789	4.60829	6.24249	0.738213	0.000349384	0.00531692	0.174829
P20491	0.42212	0.312983	0.273262	1.56359	0.85747	1.21901	1.03612	1.29665	1.09863	0.336122	1.21336	1.1438	0.0770791	0.353093	0.136012	3.60987	3.40292	1.06081	0.0136502	0.000862695	0.766107
P98078	0.437114	0.455029	0.410194	0.952214	0.814209	1.11668	1.18159	1.56569	1.32464	0.434112	0.961035	1.35731	0.0225676	0.151429	0.194124	2.21379	3.12663	0.708046	0.00397613	0.00121521	0.0494221
Q8K1B8	0.444986	0.431568	0.380638	3.29339	1.97814	3.02614	1.22176	1.39665	1.54687	0.419064	2.76589	1.38843	0.0339472	0.695174	0.162712	6.60017	3.31316	1.99211	0.00428523	0.000540501	0.0287904
Q07968	0.457348	0.288977	0.308217	1.31377	1.69287	1.30898	0.538706	0.786993	0.969521	0.351514	1.43854	0.765073	0.0921582	0.220267	0.216242	4.09241	2.17651	1.88026	0.00139855	0.0381284	0.0194523
Q6ZWU9	0.474152	0.579597	0.439924	1.22101	0.858349	1.05405	1.36402	1.14978	1.32313	0.497891	1.04447	1.27898	0.0727999	0.181519	0.113742	2.09779	2.56879	0.816644	0.00839606	0.0005581	0.130816
O89086	0.48031	0.603375	0.692243	2.48488	2.74711	2.51616	2.27249	2.81824	2.28183	0.591976	2.58272	2.45752	0.106425	0.143223	0.312429	4.36287	4.15139	1.05094	4.22729e-05	0.000610131	0.562346
Q9CQC6	0.48794	0.487906	0.538455	1.11868	0.98463	1.01648	1.22496	1.02384	1.25432	0.504767	1.03993	1.16771	0.0291748	0.0700314	0.125452	2.06022	2.31336	0.890573	0.000257628	0.000875182	0.198308
P52430	0.506124	0.561739	0.455734	2.46736	2.51878	2.17817	0.91111	1.61017	1.32353	0.507866	2.38811	1.2816	0.0530238	0.183614	0.351409	4.70224	2.52351	1.86337	6.9558e-05	0.0195881	0.00843832
Q6ZQM8	0.519072	0.370956	0.307568	1.83004	1.34537	2.02675	1.37785	1.90031	1.95732	0.399198	1.73405	1.74516	0.108543	0.350685	0.319376	4.34384	4.37166	0.993636	0.00324808	0.00229946	0.969595
P54116	0.520047	0.392409	0.332082	1.82627	1.29721	1.75428	0.821478	1.18643	1.16655	0.414846	1.62592	1.05815	0.0959703	0.286938	0.205206	3.91933	2.55071	1.53657	0.00227261	0.00793774	0.0494276
Q02105	0.665244	0.452201	0.384372	1.02869	1.28003	1.39779	1.57786	1.2533	2.06831	0.500606	1.2355	1.63316	0.146559	0.188538	0.410312	2.46802	3.26236	0.756513	0.00596413	0.0108039	0.201878
Q91YP3	0.674892	0.479452	0.488264	1.7553	1.47779	1.6145	1.16191	1.10258	1.20028	0.547536	1.61586	1.15493	0.110381	0.138762	0.0492251	2.95116	2.10932	1.39911	0.000476317	0.000959163	0.00560792
O70492	0.698032	1.06102	0.792313	1.78475	1.56844	2.06721	2.22135	2.99625	2.14252	0.850456	1.8068	2.45337	0.18835	0.250117	0.471792	2.12451	2.88478	0.736455	0.00612697	0.0054514	0.103979
O70362	0.707769	0.608007	0.481948	2.79921	2.54234	2.71005	1.26134	2.18614	1.91939	0.599241	2.68387	1.78896	0.113165	0.130423	0.475999	4.47878	2.98537	1.50024	3.0911e-05	0.0135674	0.0348271
P10852	0.74865	0.56086	0.639659	1.53619	1.56566	1.62939	1.54567	1.61656	1.38615	0.649723	1.57708	1.51613	0.0942985	0.0476385	0.11801	2.42731	2.3335	1.0402	0.000109132	0.000576527	0.453426
Q61656	0.787049	0.603733	0.762389	1.87572	1.56268	1.81662	1.48862	1.46216	1.37891	0.717723	1.75167	1.44323	0.0994856	0.166321	0.0572514	2.44059	2.01085	1.21371	0.000762432	0.000395431	0.0385093
O89017	0.875522	0.578404	0.660255	1.76964	1.59459	2.14496	1.88449	2.66291	2.12778	0.704727	1.8364	2.22506	0.15347	0.281191	0.398223	2.60582	3.15733	0.825324	0.00361307	0.0035033	0.239443
Q8BND5	1.08172	0.944238	0.91559	3.15837	4.55187	3.01963	2.19263	1.79833	2.68006	0.980516	3.57662	2.22367	0.0888082	0.84743	0.441686	3.6477	2.26786	1.60843	0.00618166	0.00877985	0.0702792
Q8K0E8	1.08344	0.847172	0.73544	8.39638	10.3298	7.19606	5.65188	8.56263	8.97954	0.888685	8.64074	7.73135	0.177676	1.58109	1.8129	9.72307	8.69977	1.11762	0.00107986	0.00287958	0.548342
P01898	1.135	0.890586	0.967963	4.35121	3.88647	3.87445	2.20171	2.18419	3.34387	0.997848	4.03738	2.57659	0.124916	0.271856	0.664546	4.04608	2.58215	1.56695	6.12536e-05	0.0155531	0.0243645
P29788	1.1605	0.841322	0.66705	4.96862	4.78071	4.04763	3.39265	6.08941	4.34652	0.889623	4.59899	4.60953	0.250245	0.486647	1.36748	5.16959	5.18144	0.997712	0.000301048	0.00977299	0.990563
E9PV24	1.43551	1.10794	1.02355	9.27348	13.2251	8.0972	7.18299	10.7142	12.0954	1.189	10.1986	9.99754	0.217613	2.68619	2.53342	8.57746	8.40837	1.02011	0.0044213	0.00388221	0.9294
P08226	1.5065	1.33208	1.18615	2.51156	3.07524	3.82853	3.9271	4.40213	5.19725	1.34158	3.13844	4.50882	0.160386	0.660759	0.641762	2.33936	3.36083	0.696067	0.0102049	0.00115434	0.0615329
Q8VCM7	1.60719	1.25241	1.11687	11.0638	13.0929	9.45422	7.31446	10.8249	11.9726	1.32549	11.2037	10.0373	0.253201	1.82338	2.4269	8.45246	7.57255	1.1162	0.000745609	0.00347475	0.542151
Q06890	1.63204	1.2057	1.17123	5.52241	6.33064	5.25416	3.88294	5.04511	4.53675	1.33632	5.7024	4.48827	0.256675	0.560357	0.5826	4.26724	3.35867	1.27051	0.000253424	0.00101573	0.0599506
Q8VCG4	1.65998	1.3103	1.21341	4.53596	2.82128	4.0469	2.91456	3.44295	3.86885	1.39456	3.80138	3.40879	0.234911	0.883313	0.478063	2.72586	2.44434	1.11517	0.0103319	0.00280951	0.535525
P11276	1.66235	1.12311	1.01296	6.04943	5.22805	5.82246	4.35606	6.17314	5.27631	1.26614	5.69998	5.2685	0.347521	0.424171	0.908566	4.50185	4.16107	1.0819	0.000150804	0.00204977	0.497487
P01027	1.77665	1.47477	1.22101	5.59449	6.34304	5.09135	4.32529	4.46597	5.71435	1.49081	5.67629	4.83521	0.278167	0.62984	0.764607	3.80752	3.24334	1.17395	0.000460198	0.00205726	0.215352
P20918	2.07246	1.69346	1.44389	5.42069	5.73039	4.59489	3.51103	5.08843	4.69106	1.7366	5.24865	4.43017	0.316499	0.586975	0.820421	3.02237	2.55106	1.18475	0.000801313	0.00606464	0.232633
Q00623	2.12033	2.08235	1.71747	8.23818	11.3225	8.51534	5.20922	8.9521	8.4568	1.97339	9.35868	7.53938	0.222437	1.70638	2.03311	4.74245	3.82053	1.24131	0.00174871	0.00921471	0.30084
Q8VCS0	2.52458	2.20401	1.71782	7.14265	6.37583	6.65669	4.14456	4.75758	5.11968	2.1488	6.72506	4.67394	0.406201	0.387956	0.492909	3.12968	2.17514	1.43884	0.000146383	0.00238038	0.00479177
G3X9D6	3.7388	3.75195	2.98149	17.2515	23.1171	16.1044	9.66992	10.8887	13.3725	3.49075	18.8243	11.3104	0.441075	3.76165	1.88699	5.39264	3.2401	1.66434	0.00217775	0.00220486	0.0364852
Q8VDP3	0.136956	0.22793	0.247992	0.508093	0.309212	0.433464	0.210652	0.153979	0.271785	0.204293	0.416923	0.212139	0.0591719	0.100467	0.058917	2.04081	1.03841	1.96533	0.0342294	0.87861	0.0381982
P70268	0.160993	0.180479	0.231653	0.64727	0.382436	0.580633	0.245517	0.299864	0.396302	0.191042	0.53678	0.313894	0.0364953	0.137755	0.0763653	2.80975	1.64307	1.71007	0.0136724	0.06577	0.0703688
Q9CX00	0.241969	0.282651	0.359618	0.624353	0.501596	0.661673	0.580872	0.501633	0.626886	0.294746	0.595874	0.569797	0.0597496	0.0837522	0.0633566	2.02165	1.93318	1.04576	0.00713218	0.00543268	0.689291
Q80W54	0.338098	0.285154	0.334293	1.08624	0.599714	0.873347	0.408871	0.483671	0.400208	0.319181	0.853099	0.430917	0.0295302	0.243893	0.0458914	2.67277	1.35007	1.97973	0.0197026	0.023876	0.0421156
Q8K1X4	0.374623	0.321399	0.339931	0.949449	0.688241	0.90176	0.434605	0.549716	0.493066	0.345318	0.846483	0.492462	0.0270179	0.139101	0.0575577	2.45132	1.42611	1.71888	0.00359751	0.0160192	0.0151823
Q921M7	0.380443	0.3737	0.343442	1.6273	0.991498	1.48942	0.647718	0.630444	0.781657	0.365862	1.3694	0.686606	0.0197069	0.334458	0.082768	3.74296	1.87668	1.99445	0.00656997	0.00284176	0.0264762
P35821	0.403979	0.457753	0.430503	1.18991	1.11321	1.04763	0.755496	0.818832	0.836288	0.430745	1.11692	0.803539	0.0268878	0.0712122	0.0425113	2.59299	1.86546	1.39	9.82569e-05	0.000212308	0.0028174
Q9R1Q9	0.428223	0.41949	0.461184	0.963654	0.709947	0.958105	0.604784	0.722047	0.668342	0.436299	0.877235	0.665058	0.0219888	0.144903	0.0587007	2.01063	1.52432	1.31904	0.00646742	0.00320496	0.0784601
Q9WUP7	0.445517	0.478812	0.476939	0.967976	0.877499	1.00222	1.0101	0.789845	0.935699	0.467089	0.949233	0.911881	0.0187059	0.0644401	0.112041	2.03223	1.95226	1.04096	0.000239682	0.00246724	0.64298
Q61210	0.445782	0.334525	0.343045	1.05837	0.640394	0.901529	0.509204	0.452835	0.541566	0.374451	0.866764	0.501202	0.0619216	0.211145	0.0449035	2.31476	1.3385	1.72937	0.0179126	0.0454595	0.042679
P49138	0.464776	0.435014	0.440485	1.01771	0.786337	0.890286	0.545958	0.545768	0.645942	0.446758	0.898111	0.579223	0.0158414	0.115885	0.057781	2.01028	1.2965	1.55055	0.00260527	0.0186268	0.0129977
P21995	0.467206	0.52407	0.692879	1.38017	0.921738	1.26791	0.549541	0.964661	0.780179	0.561385	1.18994	0.764794	0.117373	0.238956	0.207987	2.11965	1.36233	1.5559	0.0149832	0.21418	0.0807408
P70290	0.479191	0.566286	0.520156	0.977439	0.94986	1.28247	0.735528	1.24366	1.09318	0.521878	1.06992	1.02412	0.0435734	0.18459	0.26101	2.05014	1.96238	1.04472	0.00746449	0.03029	0.816235
P70677	0.482924	0.407576	0.474179	1.14402	0.933583	1.12782	0.732601	0.718095	0.79061	0.454893	1.06848	0.747102	0.0412104	0.117101	0.0383707	2.34885	1.64237	1.43016	0.00102226	0.000848023	0.0106814
Q9JI10	0.497022	0.460001	0.395855	1.02732	0.770931	1.01414	0.564506	0.594356	0.654855	0.45096	0.937466	0.604572	0.0511862	0.144374	0.0460326	2.07883	1.34063	1.55063	0.00532426	0.0180711	0.0190217
Q99KE1	0.49848	0.370312	0.416628	0.938686	0.830368	1.0402	0.674158	0.691803	0.574282	0.428474	0.936418	0.646748	0.0649001	0.104935	0.0633742	2.18548	1.50942	1.44789	0.00204535	0.014056	0.0149411
P25206	0.520948	0.632056	0.766439	1.58701	1.27702	1.59274	1.26643	1.18059	1.27986	0.639815	1.48559	1.24229	0.122929	0.180651	0.0538546	2.32191	1.94164	1.19585	0.00257603	0.00147513	0.0890684
Q8BU31	0.541802	0.402518	0.458999	1.2349	0.959742	1.26798	0.65002	0.805579	0.812209	0.467773	1.15421	0.755936	0.0700551	0.169222	0.0917859	2.46745	1.61603	1.52686	0.00290385	0.0124219	0.0230997
Q91UZ5	0.550697	0.747539	0.942671	2.23645	1.24036	2.09907	1.04121	0.839334	0.935207	0.746969	1.85863	0.938582	0.195988	0.539822	0.100978	2.48823	1.25652	1.98025	0.0284973	0.206692	0.0440431
Q60634	0.570909	0.445631	0.494761	1.28673	0.746075	1.13519	0.610027	0.718115	0.568595	0.503767	1.056	0.632246	0.0631228	0.278891	0.0771968	2.0962	1.25504	1.67023	0.0287017	0.0894525	0.0642308
Q80YC5	0.660601	0.429113	0.393116	1.55455	1.62526	1.45833	0.763776	1.07537	0.996678	0.494276	1.54605	0.945275	0.145161	0.0837869	0.162032	3.1279	1.91244	1.63555	0.000406695	0.0229465	0.00466844
O09005	0.698759	0.411093	0.563588	1.69355	1.47979	1.51072	0.705195	0.849659	0.845269	0.557813	1.56135	0.800041	0.14392	0.115527	0.0821682	2.79906	1.43424	1.95159	0.000708415	0.0645533	0.000743396
Q9WV32	0.707067	0.800715	0.705395	2.45731	1.33934	2.33324	1.25994	1.21774	1.2198	0.737726	2.0433	1.23249	0.0545566	0.61279	0.0237905	2.76972	1.67067	1.65785	0.021285	0.000135226	0.0838566
Q4KML4	0.713432	0.87447	0.96963	1.53681	1.40691	2.19144	1.44911	1.46316	1.17704	0.852511	1.71172	1.3631	0.129503	0.420496	0.16129	2.00786	1.59893	1.25575	0.0277247	0.0128935	0.251085
Q9D2V7	0.716393	0.614614	0.645264	1.82561	1.10408	1.81864	0.823535	0.833343	0.970432	0.658757	1.58277	0.87577	0.052214	0.414575	0.0821261	2.40267	1.32943	1.80729	0.0186151	0.0181115	0.0442294
Q60749	0.801933	0.745733	0.917837	1.94257	1.31107	1.88823	1.69494	1.49743	1.21641	0.821834	1.71395	1.4696	0.087761	0.349967	0.240477	2.08552	1.78819	1.16628	0.0128206	0.0118489	0.375302
Q9CVB6	0.849596	0.875332	0.851823	2.56861	1.66841	2.61479	1.43109	1.4149	1.71947	0.858917	2.28394	1.52182	0.0142594	0.533562	0.171363	2.65909	1.77179	1.5008	0.00984954	0.00261502	0.0780456
Q62422	0.867394	0.658762	0.778251	2.45361	2.02786	2.22783	1.20392	0.990232	1.3119	0.768136	2.23643	1.16868	0.104683	0.213005	0.163702	2.91151	1.52145	1.91363	0.000429858	0.0233674	0.0023334
P08030	0.897823	1.14587	1.08278	2.41816	1.79649	2.40933	1.48715	1.53771	1.70127	1.04216	2.20799	1.57538	0.128915	0.356399	0.111919	2.11868	1.51165	1.40156	0.00597341	0.00565497	0.0426773
Q61792	0.936851	0.861383	0.640028	2.53212	1.68111	2.11348	1.18507	1.30767	1.40685	0.812754	2.1089	1.29986	0.154271	0.425525	0.111099	2.59476	1.59933	1.6224	0.00770651	0.0113524	0.0333341
P84096	1.00998	0.96544	0.986611	2.82317	1.7032	2.51171	1.2072	1.23054	1.25819	0.987342	2.34603	1.23198	0.0222769	0.578076	0.025528	2.37611	1.24777	1.90428	0.0152489	0.000235174	0.028978
Q9DBD0	1.03009	0.809889	0.731168	2.07144	1.74749	1.78956	0.962666	1.24229	1.37488	0.857048	1.8695	1.19328	0.154939	0.176151	0.210432	2.18132	1.39231	1.56669	0.00171228	0.089752	0.0129712
Q01279	1.03128	1.13015	0.666281	1.9025	1.91356	2.2821	1.14382	1.54418	1.53005	0.942573	2.03272	1.40602	0.244329	0.216042	0.227177	2.15657	1.49168	1.44573	0.00442398	0.0738721	0.0257605
Q9R0P5	1.08981	1.44229	0.949351	2.80431	1.7825	2.97974	1.82266	1.74968	1.94813	1.16048	2.52218	1.84015	0.253957	0.646562	0.100377	2.17339	1.58568	1.37064	0.0273958	0.0125361	0.145316
P26039	1.14682	1.05122	1.08212	2.5729	1.86417	2.54119	1.61592	1.50388	1.67764	1.09339	2.32609	1.59915	0.0487863	0.400348	0.0880839	2.12741	1.46256	1.45458	0.00611219	0.000961158	0.0372374
Q9EST5	1.24334	1.53715	1.36467	3.38327	2.22806	3.62049	2.78509	2.20505	2.41857	1.38172	3.07728	2.46957	0.147644	0.744946	0.293365	2.22713	1.78731	1.24608	0.0180385	0.00457249	0.258926
P26041	1.24459	1.1916	1.26315	2.81053	2.21362	2.7982	2.21418	2.04779	2.35664	1.23312	2.60745	2.2062	0.0371284	0.341123	0.154577	2.11452	1.78913	1.18187	0.00226737	0.000447991	0.137081
P40124	1.31033	1.01744	1.20814	3.33405	2.25237	3.1891	1.62945	1.49003	1.78847	1.17864	2.92517	1.63598	0.148659	0.587157	0.149323	2.48183	1.38803	1.78802	0.00751957	0.0197833	0.0210989
Q9CQI6	1.35372	1.18894	1.28242	4.94364	3.1148	4.59927	2.31429	2.21197	2.54808	1.27503	4.21924	2.35811	0.0826378	0.971844	0.172288	3.30914	1.84946	1.78924	0.00639067	0.000603495	0.0309046
P47753	1.36168	1.44426	1.49607	3.75598	2.81547	3.56592	2.16006	2.06158	2.27258	1.434	3.37912	2.16474	0.0677783	0.497303	0.105577	2.35643	1.50958	1.56098	0.00256402	0.000543212	0.0144075
P04186	1.40984	1.0573	0.929706	2.79146	3.55839	2.64601	1.98259	1.8542	2.67006	1.13228	2.99862	2.16895	0.248692	0.490198	0.438698	2.6483	1.91556	1.38252	0.00417801	0.023573	0.0942727
Q8BTM8	1.41821	1.30685	1.53004	4.38443	3.08486	4.00967	2.51666	2.11295	2.53346	1.41837	3.82632	2.38769	0.111594	0.668905	0.238082	2.6977	1.68341	1.60252	0.00354569	0.00308726	0.0246831
P61161	1.48515	1.3718	1.43016	3.29663	2.55549	3.12797	2.02067	1.98672	2.08208	1.42904	2.99336	2.02982	0.0566854	0.38847	0.0483339	2.09467	1.42041	1.47469	0.00231137	0.000152344	0.0130204
Q8VDD5	1.52995	1.30189	1.44555	3.98797	2.56395	3.60425	2.464	2.01449	2.43607	1.4258	3.38539	2.30485	0.115309	0.73681	0.25185	2.37438	1.61654	1.46881	0.0104089	0.00533932	0.0740721
Q93092	1.53455	1.48009	1.4669	3.68328	2.33314	3.49971	1.7265	1.45678	1.88218	1.49385	3.17205	1.68849	0.0358649	0.732286	0.215234	2.12341	1.13029	1.87863	0.0166131	0.197231	0.0281322
Q9CQW9	1.688	1.442	1.3544	3.11947	3.21133	2.97895	1.31669	1.73718	1.66198	1.4948	3.10325	1.57195	0.172951	0.117034	0.224234	2.07603	1.05161	1.97414	0.000182531	0.661617	0.000467565
Q9R111	1.70814	1.39926	1.25359	4.25617	3.36447	4.43931	2.09226	2.50507	2.46835	1.45366	4.01998	2.35523	0.232108	0.575027	0.228472	2.76541	1.6202	1.70684	0.0020053	0.0086823	0.00958894
Q9CPW4	1.73707	1.50483	1.55337	5.29896	2.99076	4.73793	2.6148	2.69424	2.9251	1.59843	4.34255	2.74472	0.122501	1.20382	0.161188	2.71677	1.71714	1.58215	0.0171326	0.000606069	0.0849155
P62264	1.75469	1.83941	1.54939	4.95959	2.95459	3.35766	2.48842	3.56578	3.07241	1.7145	3.75728	3.04221	0.149131	1.06056	0.539315	2.19147	1.7744	1.23505	0.0298306	0.0147346	0.356673
P59999	1.77852	1.78778	1.8507	4.73094	3.45594	4.6091	2.68009	2.57208	2.77325	1.80567	4.26533	2.67514	0.0392755	0.703594	0.100673	2.36219	1.48152	1.59443	0.00377628	0.000153757	0.0179154
O89020	1.82291	1.24872	1.04054	2.92536	2.74475	2.7346	1.59977	2.86023	2.21083	1.37073	2.80157	2.22361	0.4052	0.10733	0.630327	2.04386	1.62221	1.25992	0.00409749	0.119977	0.192493
Q03734	1.94335	1.57953	1.30876	4.24449	3.689	3.89831	2.51516	3.78999	2.70024	1.61055	3.94393	3.0018	0.318429	0.280545	0.688842	2.44882	1.86384	1.31386	0.000678784	0.0336847	0.0932778
Q3THE2	1.9678	1.41732	1.62945	3.66012	3.0367	3.48897	2.16279	1.99773	2.30227	1.67152	3.39526	2.15426	0.277643	0.322098	0.15245	2.03124	1.2888	1.57607	0.00216777	0.0575958	0.00380787
Q99JY9	1.9879	1.76486	1.8375	4.73893	3.4585	4.403	2.69733	2.58392	2.77552	1.86342	4.20015	2.68559	0.113758	0.663881	0.0963359	2.254	1.44122	1.56395	0.00386153	0.000670699	0.0173868
P62962	2.28118	2.41427	2.20064	6.83954	5.37443	7.39745	4.61901	3.80678	4.801	2.2987	6.53714	4.40893	0.107887	1.04486	0.529354	2.84385	1.91801	1.4827	0.00220529	0.00248985	0.0346117
Q00897	2.3637	2.12678	1.98753	4.79534	4.73055	4.1101	3.05311	4.02191	4.19994	2.15934	4.54533	3.75832	0.190184	0.378309	0.617182	2.10497	1.7405	1.20941	0.00061735	0.0127626	0.132811
P11352	2.40381	2.4379	2.19178	5.32049	4.0708	5.60819	3.33915	2.97944	3.81445	2.3445	4.99983	3.37768	0.13335	0.817318	0.418838	2.13258	1.44069	1.48025	0.00514432	0.0152075	0.0376834
P15379	2.73789	2.41127	3.1074	7.15685	4.50883	6.61833	4.15494	4.0729	4.18481	2.75219	6.09467	4.13755	0.348289	1.39952	0.0579461	2.21448	1.50337	1.47301	0.0159407	0.00244851	0.0727587
Q9JM76	2.7558	2.19914	2.39063	6.75481	4.86545	6.67174	3.78616	3.79929	4.45909	2.44852	6.09733	4.01485	0.282813	1.06765	0.38478	2.49021	1.6397	1.5187	0.00461628	0.00473836	0.0335893
Q9JHH6	2.76694	2.46561	2.04422	4.82219	6.90278	4.45366	3.60135	4.44301	4.89203	2.42559	5.39287	4.31213	0.363021	1.32054	0.655216	2.22332	1.77776	1.25063	0.0198997	0.0120411	0.272994
P46412	3.31402	4.37787	3.07936	8.29058	9.24624	7.84554	4.37224	5.34112	5.55965	3.59042	8.46079	5.091	0.691975	0.715692	0.631983	2.35649	1.41794	1.66191	0.00106308	0.0501548	0.00362547
P99029	4.0369	4.34588	3.56778	13.2461	8.51702	12.9169	5.95571	4.77039	6.7959	3.98352	11.56	5.84066	0.391787	2.64045	1.01764	2.90196	1.46621	1.97923	0.00795148	0.0419758	0.02488
P22599	5.54592	3.98345	3.4114	9.19065	10.0525	7.23284	6.43196	6.80099	7.92027	4.31359	8.82532	7.05107	1.10489	1.44488	0.775033	2.04593	1.63462	1.25163	0.0126831	0.0246009	0.134167
Q9JI48	13.0502	12.1675	9.61674	36.4217	22.5464	38.6029	15.7111	22.1677	19.209	11.6115	32.5237	19.0293	1.78299	8.70913	3.23207	2.80099	1.63883	1.70914	0.0151673	0.0253369	0.0656319
Q9D6J1	0.520237	0.581471	0.510079	0.119968	0.0914279	0.0820046	0.646588	0.713032	0.690721	0.537262	0.0978003	0.683447	0.0386211	0.0197679	0.033814	0.182035	1.27209	0.143098	6.19841e-05	0.00785823	1.32068e-05
Q64449	0.540795	0.483694	0.439053	0.190802	0.161421	0.183395	0.676933	0.402836	0.601838	0.487847	0.178539	0.560535	0.0509982	0.0152804	0.141639	0.365974	1.149	0.318516	0.0005485	0.450027	0.00970251
Q8BGK2	0.61594	0.935402	0.849506	0.256376	0.189717	0.314278	0.654793	0.563377	0.402833	0.800283	0.253457	0.540335	0.165322	0.0623315	0.127551	0.31671	0.67518	0.469075	0.00584378	0.0972958	0.0248955
Q60716	0.661587	0.513775	0.5844	0.242297	0.277141	0.246819	0.685834	0.484823	0.58425	0.586587	0.255419	0.584969	0.0739301	0.0189471	0.100507	0.435432	0.997241	0.436637	0.00167749	0.983153	0.00505442
Q9D1M7	0.952661	0.776377	0.55622	0.476353	0.293657	0.338628	0.779846	1.02072	0.837341	0.761753	0.369546	0.879301	0.198625	0.0951911	0.125797	0.485126	1.15431	0.420273	0.0367801	0.435357	0.00500241
Q6NXL1	0.977885	0.949263	0.743445	0.456447	0.323324	0.348895	0.95512	0.65016	0.786114	0.890198	0.376222	0.797131	0.127894	0.0706437	0.152778	0.422627	0.895454	0.47197	0.0036695	0.463869	0.0123376
Q8CI59	2.16751	1.96331	1.6354	0.605948	0.888126	0.69797	1.75516	1.61662	1.61951	1.92207	0.730681	1.66376	0.268439	0.143905	0.0791636	0.380153	0.865608	0.439174	0.0024769	0.185147	0.0005982
Q8VCH6	2.76231	2.18214	2.46588	0.584088	0.742603	0.558823	1.17333	1.59965	1.04991	2.47011	0.628505	1.2743	0.290109	0.0996163	0.288441	0.254444	0.515887	0.493216	0.000482912	0.00716616	0.0214765
Q3ULD5	0.576536	0.769737	0.774549	0.264041	0.316933	0.216087	0.338295	0.338899	0.293643	0.706941	0.265687	0.323612	0.11296	0.0504432	0.0259563	0.375826	0.457765	0.821002	0.00348734	0.00459787	0.151692
Q8K0U4	0.678675	0.694594	0.556801	0.293463	0.275375	0.263141	0.228948	0.200724	0.195537	0.643357	0.277326	0.208403	0.0753812	0.0152549	0.0179803	0.431062	0.32393	1.33072	0.00118115	0.000626929	0.00716652
Q64471	0.7033	0.63185	0.431406	0.175042	0.275956	0.303392	0.226626	0.22156	0.234328	0.588852	0.251463	0.227504	0.140954	0.0675896	0.00642945	0.427039	0.386352	1.10531	0.0201511	0.0113723	0.574093
Q9DCJ5	0.73782	0.945498	1.05517	0.39706	0.452721	0.334767	0.467686	0.448265	0.332378	0.912829	0.39485	0.416109	0.161177	0.0590082	0.0731611	0.432556	0.455846	0.948908	0.0063966	0.00827589	0.715206
P52196	0.765534	1.05513	0.641465	0.313152	0.344428	0.248467	0.330388	0.283802	0.237917	0.820709	0.302015	0.284036	0.212279	0.0489402	0.0462357	0.367993	0.346086	1.0633	0.0145649	0.0128623	0.667728
Q99MR8	0.824767	1.24197	0.958769	0.459239	0.466447	0.298616	0.502306	0.591864	0.382333	1.0085	0.408101	0.492168	0.213	0.0948848	0.105133	0.404661	0.488019	0.82919	0.0111622	0.0196892	0.361978
Q7TMF3	0.875975	1.15253	1.33098	0.447657	0.445392	0.332262	0.523547	0.522811	0.387123	1.11983	0.408437	0.477827	0.22926	0.0659793	0.0785527	0.364731	0.426696	0.85478	0.00667535	0.0101187	0.306389
Q9D023	0.947978	1.48583	1.35991	0.624619	0.519337	0.487364	0.414955	0.41911	0.40308	1.26457	0.543773	0.412382	0.281313	0.071816	0.00831894	0.430006	0.326104	1.31862	0.0126451	0.00632021	0.0345858
Q05920	0.969066	1.45647	1.14919	0.406125	0.492045	0.359743	0.446452	0.62122	0.446921	1.19157	0.419304	0.504864	0.246449	0.0671285	0.100767	0.351891	0.423695	0.830529	0.00635435	0.0110984	0.288137
P12367	1.05513	1.00316	1.19599	0.386443	0.576785	0.368642	0.429463	0.349959	0.253486	1.08476	0.443957	0.344303	0.0997744	0.115377	0.0881248	0.409267	0.3174	1.28944	0.00189532	0.000649105	0.300236
Q9WUD1	1.0685	0.724611	1.03301	0.41358	0.402833	0.464587	0.492788	0.467527	0.42658	0.942043	0.427	0.462298	0.189135	0.0329917	0.0334119	0.45327	0.49074	0.923646	0.00968703	0.0123849	0.262813
Q99J47	1.1512	0.987767	0.917147	0.468886	0.480724	0.413572	0.410654	0.467811	0.379782	1.01871	0.454394	0.419416	0.120057	0.0358449	0.0446638	0.44605	0.411714	1.0834	0.00145683	0.00126079	0.349761
Q9DBX3	1.28749	0.927423	1.12949	0.422064	0.610837	0.511158	0.438424	0.548395	0.461226	1.1148	0.514687	0.482682	0.180483	0.094436	0.0580398	0.461685	0.432976	1.06631	0.00696888	0.0044643	0.643265
Q70IV5	1.32258	1.6576	1.70015	0.38834	0.56337	0.328138	0.562811	0.742941	0.536311	1.56011	0.426616	0.614021	0.2068	0.122198	0.112432	0.273452	0.393575	0.694791	0.00122017	0.00223777	0.122284
P04441	1.35086	1.08272	1.43975	0.401359	0.412391	0.266479	0.601873	0.481959	0.652274	1.29111	0.360076	0.578702	0.185863	0.0812454	0.0874896	0.278889	0.448221	0.622214	0.00135588	0.00386667	0.0338069
Q8BHI7	1.41215	1.23518	1.14958	0.482889	0.358958	0.495133	0.508743	0.381752	0.463599	1.26563	0.44566	0.451365	0.133911	0.0753351	0.0643736	0.352124	0.356631	0.987361	0.000761481	0.000687402	0.925368
P16330	1.43187	1.18665	1.14188	0.585141	0.460583	0.611986	0.434332	0.467271	0.531091	1.25347	0.55257	0.477565	0.156114	0.080786	0.0491939	0.440833	0.380995	1.15706	0.00230548	0.00119923	0.241551
Q9JHI5	1.51987	1.99211	1.89642	0.715799	0.872226	0.704178	0.762971	0.91128	0.704939	1.8028	0.764068	0.793063	0.249652	0.0938479	0.106411	0.423823	0.439907	0.963439	0.0025174	0.00298351	0.741237
Q8BH59	1.59384	2.39332	2.35668	0.863339	1.04622	0.599562	1.0697	0.997446	0.857611	2.11461	0.836372	0.974919	0.451372	0.224544	0.107824	0.39552	0.461039	0.857889	0.011768	0.0131197	0.38991
O35678	1.64479	1.71928	1.57257	0.563251	0.440729	0.519926	0.692905	1.05268	0.632113	1.64555	0.507968	0.792567	0.0733578	0.0621298	0.227309	0.308693	0.481644	0.640915	3.34661e-05	0.00347175	0.104611
Q9CQJ8	1.81161	2.86642	3.07179	0.642341	0.644828	0.418317	0.757987	0.782099	0.529916	2.58327	0.568495	0.690001	0.676124	0.130064	0.139161	0.220068	0.267104	0.823905	0.00713845	0.00896775	0.331204
Q63918	1.83195	1.75887	1.96072	0.670504	0.905722	0.754651	0.770867	0.896815	0.677433	1.85051	0.776959	0.781705	0.102199	0.119186	0.110092	0.419862	0.422426	0.993929	0.00029099	0.000249086	0.962022
P00329	2.11172	2.02156	1.71091	0.664483	1.17553	0.902735	0.69466	0.98117	0.561322	1.94806	0.91425	0.745717	0.210274	0.255719	0.21453	0.469312	0.382799	1.226	0.0056598	0.00227306	0.431198
Q6PIE5	2.12223	3.08066	2.78524	1.23801	1.59324	1.0274	1.33342	1.40793	1.19373	2.66271	1.28622	1.31169	0.490827	0.285983	0.108738	0.483047	0.492616	0.980576	0.0137291	0.00962785	0.892291
Q8JZR0	2.18108	1.81128	1.96913	0.67613	0.637296	0.501634	0.665445	1.02858	0.770707	1.98716	0.60502	0.821576	0.185558	0.0916161	0.186834	0.304464	0.413442	0.736414	0.000318984	0.00155584	0.145807
Q7TMD7	2.1899	1.36836	2.07975	0.521977	0.917724	0.733557	0.413401	0.525488	0.501047	1.87934	0.724419	0.479979	0.445932	0.198032	0.0589387	0.385465	0.255398	1.50927	0.014856	0.00573633	0.109799
Q91WS0	2.26499	3.8628	3.3926	1.29597	0.98295	0.959132	1.60375	1.53141	1.20159	3.17346	1.07935	1.44559	0.821134	0.187973	0.214378	0.340117	0.455524	0.746652	0.0125876	0.0243077	0.0901256
P55292	2.39982	1.47399	2.29979	0.620317	0.677455	0.646983	0.569138	0.593294	0.689858	2.05786	0.648252	0.61743	0.508114	0.0285902	0.0638766	0.315012	0.300034	1.04992	0.00866409	0.0082091	0.488074
O35459	2.40481	2.49747	2.74236	1.28035	1.07862	1.11498	1.22395	1.22716	1.21438	2.54822	1.15798	1.22183	0.174404	0.107516	0.00664899	0.454429	0.479485	0.947744	0.000299844	0.000192393	0.362627
A0A571BEN1	2.74106	4.47291	4.78694	1.60826	1.83406	1.04604	1.90471	1.91196	1.3848	4.0003	1.49612	1.73382	1.10178	0.405803	0.302284	0.374002	0.433423	0.862902	0.0209437	0.0263896	0.46151
Q8BPB5	2.81034	2.23518	2.22955	0.844964	1.08552	0.95762	0.664912	0.856182	0.692862	2.42502	0.962702	0.737986	0.333709	0.120359	0.103311	0.396987	0.304321	1.3045	0.00203548	0.0011171	0.0701559
Q9D6R2	2.923	4.25751	4.25105	1.84122	2.04444	1.4659	1.81447	1.90012	1.91422	3.81052	1.78385	1.87627	0.768621	0.293502	0.0539831	0.468139	0.492391	0.950746	0.012986	0.0121758	0.620144
P03911	3.00255	4.29097	4.84355	1.75029	2.17548	1.29624	1.93232	2.03366	1.91877	4.04569	1.74067	1.96158	0.94469	0.439698	0.0627893	0.430252	0.484858	0.887378	0.0185946	0.0188961	0.437548
P16125	3.13916	3.96788	4.18673	1.17044	1.36101	0.974693	1.19433	1.29791	1.0207	3.76459	1.16871	1.17098	0.552579	0.193164	0.14007	0.310449	0.311052	0.998063	0.00154505	0.00140191	0.987652
P05201	3.57865	5.58467	5.30668	1.73069	2.38327	1.53647	2.41638	2.24722	2.05967	4.82333	1.88348	2.24109	1.08685	0.443595	0.178436	0.390493	0.464636	0.840429	0.0122752	0.0153385	0.264869
P14094	3.7479	4.71862	5.23995	1.64148	2.18146	1.30826	2.00997	2.13106	1.72448	4.56882	1.7104	1.95517	0.757222	0.440659	0.208758	0.374364	0.427937	0.874809	0.00483064	0.00449718	0.43366
Q9D9V3	4.08957	4.36068	3.74635	1.0458	1.17708	0.954964	1.32968	1.94548	1.50225	4.06554	1.05928	1.59247	0.30787	0.111672	0.31766	0.260552	0.3917	0.665182	9.14688e-05	0.000636572	0.0517621
Q9D1H9	4.15683	4.00544	4.15608	1.53846	2.13465	1.56943	1.83357	1.73636	1.28398	4.10612	1.74751	1.61797	0.0871892	0.335626	0.293296	0.425587	0.394039	1.08006	0.000297067	0.000147477	0.641148
Q9QZ47	4.53426	7.40575	5.94902	1.68813	1.8186	1.27334	2.0891	2.48544	1.76097	5.96301	1.59336	2.11183	1.4358	0.28472	0.362767	0.267207	0.354156	0.754489	0.00664933	0.0107873	0.123333
Q9D6J6	4.74301	5.97963	6.33603	2.1424	2.66263	2.02353	2.60486	3.01516	2.31422	5.68622	2.27619	2.64475	0.836059	0.339908	0.35217	0.400299	0.465115	0.860645	0.00281801	0.00437583	0.262135
P21812	6.07941	4.95191	3.4101	1.23332	1.60294	1.581	1.06103	1.08303	1.32233	4.81381	1.47242	1.15546	1.34	0.20736	0.14493	0.305874	0.240031	1.27431	0.0129688	0.0092997	0.0958084
Q5SX40	7.12352	8.46345	9.92234	4.35902	4.55508	2.72232	4.84289	3.86172	2.85473	8.5031	3.87881	3.85311	1.39983	1.00633	0.99411	0.456164	0.453142	1.00667	0.00969151	0.00937083	0.976411
P13542	8.21391	11.7515	12.2449	5.14078	5.01702	3.53399	6.49538	5.70118	3.67864	10.7367	4.56393	5.29173	2.19873	0.894099	1.45232	0.425076	0.492862	0.862464	0.0107857	0.0231877	0.500846
Q9WVH9	9.58557	8.07313	9.06597	3.72007	2.99282	3.74278	3.87151	3.19389	2.78545	8.90822	3.48523	3.28362	0.768462	0.426584	0.548563	0.391237	0.368605	1.0614	0.000434333	0.000497764	0.641714
P53395	0.378684	0.56886	0.591277	0.199223	0.29993	0.177091	0.220458	0.348224	0.22696	0.51294	0.225415	0.265214	0.116809	0.0654741	0.0719622	0.439456	0.517046	0.849935	0.0204913	0.0352719	0.517716
Q80U72	0.384434	0.298662	0.271019	0.164544	0.100143	0.136116	0.225317	0.212015	0.182893	0.318038	0.133601	0.206742	0.0591386	0.0322738	0.0216976	0.420079	0.650053	0.646223	0.00902619	0.0376517	0.0311537
Q924M7	0.451558	0.786117	0.672721	0.2505	0.179558	0.249238	0.463417	0.432027	0.375486	0.636799	0.226432	0.423643	0.170148	0.0405991	0.0445611	0.355579	0.66527	0.534487	0.0153066	0.103763	0.00478354
Q8BJU0	0.508318	0.318564	0.347638	0.183279	0.173372	0.206227	0.39837	0.269782	0.375796	0.391506	0.187626	0.347983	0.102201	0.0168533	0.0686577	0.479242	0.88883	0.539183	0.0270468	0.573446	0.0171212
E9Q6R7	0.581204	0.50273	0.553539	0.238106	0.273153	0.267066	0.316425	0.323339	0.28287	0.545824	0.259442	0.307544	0.0398013	0.0187259	0.0216468	0.475321	0.563449	0.843591	0.000352344	0.000805586	0.0436403
O08599	0.597416	0.620407	0.541164	0.244237	0.302617	0.23979	0.26641	0.280494	0.347596	0.586329	0.262215	0.298167	0.0407684	0.0350598	0.0433823	0.447215	0.508532	0.879424	0.000475536	0.00110729	0.326789
Q62417	0.625826	0.716	0.880685	0.270321	0.395419	0.296121	0.393912	0.544578	0.385394	0.740837	0.32062	0.441294	0.129232	0.0660497	0.0895473	0.432781	0.59567	0.726545	0.00741157	0.0299368	0.133525
Q8CG76	0.631707	0.843766	0.786326	0.346015	0.400644	0.29684	0.443213	0.364755	0.354415	0.753933	0.347833	0.387461	0.109678	0.0519256	0.0485585	0.461358	0.51392	0.897723	0.00440464	0.00612056	0.388982
Q91W40	0.719695	0.748188	0.785377	0.324903	0.418424	0.36496	0.434703	0.476628	0.357801	0.751087	0.369429	0.423044	0.032937	0.04692	0.0602655	0.491859	0.563243	0.873263	0.000322976	0.00116498	0.290882
P62761	0.749708	0.807571	0.762354	0.333632	0.269508	0.360326	0.621768	0.523488	0.725426	0.773211	0.321155	0.623561	0.0304212	0.0466772	0.100981	0.415352	0.806456	0.515034	0.000148772	0.0698613	0.00925146
Q8BZF8	0.757803	1.27853	1.22078	0.433683	0.505888	0.453028	0.581348	0.65785	0.52852	1.0857	0.464199	0.589239	0.285434	0.0373766	0.0650255	0.427557	0.542726	0.787795	0.0201309	0.0425014	0.0446711
Q8C522	0.799651	0.74783	0.867628	0.428133	0.356749	0.392958	0.582035	0.518678	0.551162	0.805036	0.392613	0.550625	0.0600805	0.035693	0.0316817	0.487696	0.683976	0.713032	0.000516194	0.0029105	0.00457999
Q7TSQ8	0.842348	0.99204	1.23787	0.269629	0.343849	0.309213	0.616443	0.535001	0.434645	1.02409	0.307564	0.528696	0.1997	0.0371379	0.0910627	0.30033	0.516261	0.58174	0.00363243	0.0174029	0.0176217
Q99MN9	0.858941	1.15312	1.10629	0.439143	0.628325	0.466119	0.690938	0.745361	0.565337	1.03945	0.511195	0.667212	0.158069	0.10233	0.0923273	0.491794	0.64189	0.766166	0.00828499	0.0244054	0.121462
Q9CXA2	0.870535	0.675046	0.646785	0.167012	0.307832	0.266867	0.519704	0.382157	0.463756	0.730789	0.247237	0.455206	0.121846	0.0724333	0.0691706	0.338315	0.622896	0.543133	0.00410705	0.0271078	0.0228287
Q64331	0.872014	0.711698	0.89583	0.357299	0.355732	0.397541	0.735072	0.439047	0.583325	0.826514	0.37019	0.585815	0.100144	0.0236989	0.148028	0.447894	0.708778	0.631924	0.0015456	0.0800152	0.0673937
Q9DC69	0.908122	1.39768	1.52159	0.595748	0.628307	0.355976	0.710038	0.816241	0.571819	1.27579	0.526677	0.699366	0.324386	0.148725	0.12256	0.412823	0.548181	0.753078	0.0220432	0.0450502	0.195601
Q99JF5	0.909541	0.817419	0.848835	0.425518	0.314341	0.49125	0.973213	0.538565	0.854522	0.858598	0.41037	0.788766	0.0468309	0.0894217	0.224661	0.477953	0.918668	0.520268	0.00153737	0.626037	0.0535109
Q5SWU9	0.944952	0.920256	0.883423	0.386152	0.474106	0.347837	0.613928	0.692128	0.612069	0.91621	0.402698	0.639375	0.0309635	0.0647405	0.0456947	0.439526	0.697847	0.629831	0.000243621	0.000966649	0.00663735
Q9D1X0	0.958322	1.05575	1.27764	0.285672	0.492501	0.354771	0.839399	0.768879	0.591002	1.09724	0.377648	0.733094	0.163653	0.105295	0.128007	0.344181	0.668127	0.515143	0.0030526	0.0385664	0.0205758
Q9D6J5	0.96752	1.21173	1.07768	0.526383	0.668839	0.401246	0.661401	0.625795	0.408953	1.08564	0.532156	0.565383	0.122298	0.13389	0.136637	0.490177	0.520782	0.941231	0.00614249	0.00796326	0.778527
P97478	0.975316	1.37358	1.22659	0.645775	0.616582	0.441049	0.758002	0.932867	0.554457	1.19183	0.567802	0.748442	0.201396	0.110738	0.189386	0.476412	0.627977	0.758646	0.00928938	0.0499244	0.226973
Q62048	1.00908	0.766633	0.870083	0.236391	0.423846	0.392748	0.491155	0.532642	0.554159	0.881932	0.350995	0.525985	0.121656	0.10046	0.0320249	0.397984	0.596401	0.667309	0.00431638	0.0080397	0.0452625
Q91VK1	1.02048	1.40658	1.65997	0.761061	0.575372	0.598741	1.2111	0.978427	0.846852	1.36234	0.645058	1.01213	0.32203	0.101139	0.184448	0.473492	0.742931	0.63733	0.0211913	0.177488	0.0390716
Q8BKZ9	1.06869	1.58641	1.65196	0.796916	0.789885	0.56381	0.773455	0.860934	0.608116	1.43568	0.71687	0.747501	0.319514	0.1326	0.128392	0.499323	0.520658	0.959022	0.0227785	0.0257812	0.788049
P55096	1.07369	0.907248	0.906714	0.497071	0.418673	0.43867	0.508278	0.67525	0.575268	0.96255	0.451471	0.586265	0.0962495	0.0407362	0.0840273	0.469037	0.609075	0.77008	0.00106501	0.00697765	0.0667532
O35409	1.07706	0.945336	0.993773	0.365127	0.502311	0.531861	0.781521	1.00167	0.57103	1.00539	0.466433	0.78474	0.066628	0.088969	0.215339	0.463932	0.780533	0.594379	0.00109998	0.16523	0.0771347
Q8QZR5	1.08043	1.24064	1.30474	0.524074	0.79893	0.463814	0.888435	0.636259	0.743653	1.2086	0.595606	0.756116	0.115536	0.178643	0.126549	0.492807	0.625613	0.787718	0.00754059	0.0102327	0.27297
Q9CQ54	1.12711	1.71035	1.7557	0.675494	0.793438	0.579006	0.91881	0.953256	0.750007	1.53105	0.682646	0.874025	0.350557	0.107395	0.108775	0.445867	0.570865	0.781038	0.0160234	0.0362053	0.0959678
Q8K2B3	1.15516	1.42395	1.36125	0.638628	0.655026	0.501893	0.696848	0.765166	0.621806	1.31345	0.598516	0.694607	0.140625	0.0840787	0.0717061	0.455681	0.52884	0.861662	0.00164245	0.00245614	0.206495
Q99LC3	1.16208	1.62614	1.45273	0.740164	0.718064	0.568884	0.84806	0.789159	0.748616	1.41365	0.675704	0.795278	0.234485	0.0931667	0.0500033	0.477986	0.562571	0.849645	0.00715184	0.0110983	0.121735
O35855	1.23539	1.71984	1.6061	0.706397	0.846644	0.668288	0.730551	0.962413	0.729594	1.52044	0.740443	0.807519	0.253329	0.0939258	0.134143	0.486992	0.531109	0.916935	0.00748861	0.0125688	0.517203
Q91YT0	1.34536	2.01339	1.94644	0.889403	1.03332	0.666783	1.11393	1.04455	0.96852	1.7684	0.863169	1.04233	0.367886	0.184672	0.0727282	0.488109	0.589422	0.828114	0.0189572	0.0284762	0.192977
Q9QYF1	1.35831	1.52765	1.51458	0.667928	0.454318	0.416368	0.847705	0.906327	0.578128	1.46685	0.512871	0.777387	0.0942227	0.135617	0.175034	0.349641	0.52997	0.659738	0.00056071	0.00386488	0.107337
Q9JJV2	1.36085	2.30569	1.73365	0.79941	0.735737	0.779169	1.10053	0.828843	0.876849	1.80007	0.771438	0.935407	0.475907	0.0325327	0.145	0.428561	0.519651	0.824709	0.0202097	0.0395393	0.12858
Q91WD5	1.36132	2.03792	2.11255	0.864235	0.921863	0.608498	1.06025	1.02798	0.861339	1.83727	0.798199	0.983192	0.413864	0.166794	0.106754	0.434449	0.535138	0.811845	0.0156901	0.0257924	0.18097
Q9CRB9	1.42503	1.2192	0.918361	0.500776	0.75908	0.444206	0.496103	0.67231	0.626188	1.18753	0.56802	0.5982	0.254816	0.167862	0.0913772	0.47832	0.503735	0.949549	0.0245268	0.0195923	0.798005
Q9WTR5	1.45	1.44139	1.5886	0.64315	0.866728	0.709006	0.948563	0.986106	0.756163	1.49333	0.739628	0.896944	0.082618	0.114892	0.123357	0.495289	0.600635	0.824609	0.000767395	0.00224268	0.181317
Q9R069	1.54558	1.25068	1.39605	0.509701	0.771801	0.538238	0.759716	0.804355	0.665771	1.39744	0.60658	0.743281	0.147456	0.143795	0.0707389	0.434066	0.531889	0.816085	0.00265393	0.00227881	0.213606
Q1XH17	1.56392	2.2653	2.24236	1.01679	1.19578	0.732292	1.31635	1.87387	1.15185	2.02386	0.981621	1.44736	0.398488	0.233738	0.37842	0.485024	0.715148	0.678215	0.01743	0.143372	0.143937
Q9QXX4	1.56476	2.33574	2.30039	1.11583	1.15362	0.825441	1.29109	1.21038	1.06925	2.06696	1.03163	1.19024	0.435279	0.179562	0.112283	0.499104	0.57584	0.866741	0.0189654	0.0278354	0.264319
Q9JMC3	1.57648	2.1506	2.34719	1.00774	0.970491	0.999403	1.35808	1.28118	0.967456	2.02476	0.992544	1.20224	0.400472	0.0195476	0.206932	0.490204	0.593769	0.825579	0.0111686	0.0341701	0.155488
Q64010	1.66907	1.64396	1.92101	0.481598	0.668062	0.657047	0.897219	0.927205	0.841969	1.74468	0.602236	0.888797	0.153226	0.10462	0.0432376	0.345184	0.509433	0.677585	0.000437771	0.000740376	0.0118331
Q9CR21	1.67071	2.07524	1.89531	0.94359	0.961879	0.860842	1.17913	1.08079	0.992147	1.88042	0.922104	1.08402	0.202674	0.0538366	0.0935324	0.490371	0.576478	0.850633	0.00137858	0.00348359	0.0601322
P19096	1.69562	1.58142	1.44812	0.584789	0.700837	0.550757	1.08472	1.04081	0.982362	1.57505	0.612128	1.03596	0.12387	0.0786862	0.0513501	0.388639	0.657733	0.590877	0.000341781	0.00223564	0.00144835
Q9CR62	1.71216	2.78657	2.76187	1.38277	1.17864	1.06669	1.66127	1.59372	1.3836	2.4202	1.20937	1.5462	0.61331	0.160266	0.144806	0.499697	0.638871	0.782156	0.0296981	0.0741765	0.0540381
Q9Z2I9	1.71622	2.87372	2.7159	1.14278	1.36263	0.904548	1.61226	1.423	1.27629	2.43528	1.13665	1.43718	0.627704	0.229105	0.16843	0.466744	0.590151	0.790889	0.0281438	0.0563906	0.141131
Q3URZ6	1.81967	1.26475	1.55235	0.461905	0.457731	0.586957	0.929517	0.965783	0.961573	1.54559	0.502198	0.952291	0.277523	0.0734332	0.0198347	0.324923	0.616133	0.527357	0.00325348	0.0209555	0.000510928
P10518	1.94944	2.11579	2.16822	1.02382	0.913726	1.12697	1.67883	1.76932	1.67341	2.07781	1.02151	1.70718	0.114227	0.106642	0.0538782	0.491626	0.821625	0.598358	0.000304381	0.00706625	0.000575258
P15626	2.202	2.12709	2.14233	0.739648	1.22211	1.0071	1.25132	1.2442	1.18392	2.15714	0.989619	1.22648	0.0395925	0.241705	0.0370307	0.458764	0.568569	0.806876	0.00117401	7.61789e-06	0.168694
Q9DC70	2.26101	3.23744	3.13923	1.42998	1.67231	1.09756	1.62581	1.88061	1.43538	2.87923	1.39995	1.64727	0.53764	0.288548	0.223388	0.486224	0.572122	0.849861	0.0137059	0.021484	0.30556
P03888	2.32853	4.10429	3.73809	1.52019	1.54931	1.33247	2.15727	2.1349	1.77683	3.3903	1.46733	2.023	0.937578	0.117689	0.213485	0.432801	0.596702	0.725322	0.0243448	0.0694766	0.0168446
Q9CQH3	2.39963	3.48945	3.5724	1.56449	1.42733	1.0991	1.79502	1.86638	1.48029	3.15383	1.36364	1.7139	0.654471	0.239144	0.205433	0.432376	0.543435	0.795636	0.0112472	0.0220455	0.126642
Q62087	2.4744	2.39191	2.25128	1.25437	1.26727	1.0219	1.47841	1.92647	1.48636	2.37253	1.18118	1.63042	0.112818	0.138093	0.256425	0.497856	0.687206	0.724465	0.000318582	0.0101201	0.0557104
O55126	2.52726	4.22755	4.01635	1.81214	1.62821	1.18729	1.8454	1.99321	1.67964	3.59039	1.54254	1.83941	0.92673	0.321111	0.156871	0.429631	0.512316	0.838606	0.0224275	0.0320771	0.223607
Q9D172	2.59409	3.5614	2.99451	1.33456	1.73811	1.32561	1.64485	1.69472	1.48835	3.05	1.46609	1.60931	0.486039	0.235614	0.107676	0.480686	0.527642	0.911008	0.00708519	0.00742442	0.392512
O55026	2.65701	1.94635	2.13535	0.845645	1.24617	1.20621	1.42561	1.46685	1.28557	2.24624	1.09934	1.39268	0.368078	0.220615	0.0950234	0.489415	0.620004	0.789375	0.00981399	0.0177047	0.101903
Q9DCT2	2.76579	3.57049	3.78353	1.55346	1.93537	1.31704	1.9758	1.96905	1.58358	3.37327	1.60196	1.84281	0.536771	0.312007	0.224527	0.474898	0.546298	0.869302	0.00780838	0.0103706	0.338839
Q9CYH2	2.78728	2.70495	2.65594	0.76579	0.967559	0.661257	1.30618	1.60665	1.28641	2.71606	0.798202	1.39975	0.0663708	0.155702	0.179457	0.293883	0.515361	0.570246	3.97521e-05	0.000284155	0.0118252
Q8K4G1	3.13212	2.41648	2.81845	1.15506	1.45177	1.38625	1.53911	1.64782	1.10139	2.78902	1.33102	1.42944	0.358725	0.155875	0.289255	0.477238	0.512525	0.931151	0.00296287	0.0069333	0.631294
P45952	3.14969	3.92396	3.8196	1.8463	1.93293	1.60419	1.95792	2.12358	1.70141	3.63108	1.79447	1.92764	0.420153	0.170384	0.212709	0.494198	0.530872	0.930918	0.00217309	0.00331157	0.445042
P04247	3.31176	5.82828	5.91352	1.82763	2.54993	1.98511	3.64534	2.91853	2.43026	5.01785	2.12089	2.99804	1.47813	0.379808	0.611427	0.422669	0.597475	0.707425	0.0302777	0.0940007	0.102407
Q91VD9	3.38603	4.22688	4.53789	1.9739	2.30855	1.56765	2.37	2.55572	2.02184	4.05027	1.95003	2.31585	0.595891	0.371026	0.27103	0.481458	0.571778	0.842037	0.00659619	0.0101146	0.239983
Q99KI0	3.72485	6.00383	6.0035	2.16649	2.75582	1.68621	2.95516	2.81414	2.28457	5.24406	2.20284	2.68462	1.31568	0.535734	0.353562	0.420063	0.511936	0.820539	0.020689	0.0312579	0.263439
Q9CQZ6	4.25214	6.01219	5.09604	2.84104	2.03732	2.14917	3.82378	3.73173	2.95951	5.12012	2.34251	3.50501	0.880272	0.435349	0.474651	0.45751	0.684556	0.668332	0.00805012	0.0489502	0.0353131
Q3UBX0	5.69409	5.59559	3.86456	2.60699	2.56625	2.30321	3.32214	3.43126	3.51291	5.05141	2.49215	3.4221	1.02902	0.16489	0.0957148	0.493356	0.677454	0.728251	0.0131215	0.052407	0.00107537
Q9D0J8	8.35466	5.74387	6.38626	2.20026	3.48572	3.4184	4.47711	4.01203	3.79159	6.82826	3.03479	4.09357	1.36036	0.723512	0.34996	0.444446	0.599505	0.741355	0.0130086	0.0279897	0.0846217
Q9DB60	0.296821	0.391784	0.324039	0.395483	0.289923	0.365204	0.665464	0.821668	0.631911	0.337548	0.350203	0.706348	0.0489019	0.0543553	0.10127	1.03749	2.09258	0.495794	0.779271	0.0047415	0.00581884
Q61553	0.45238	0.395245	0.361162	0.388044	0.462095	0.507243	1.32526	0.711127	1.1876	0.402929	0.452461	1.07466	0.0460921	0.0601803	0.322266	1.12293	2.66712	0.421026	0.320988	0.0232939	0.0302935
Q8CF02	0.453324	0.427087	0.455373	0.342231	0.569881	0.429627	0.947658	0.668865	1.06908	0.445261	0.447246	0.895202	0.0157729	0.114843	0.205201	1.00446	2.01051	0.499604	0.97776	0.0193243	0.0299476
Q9R0E2	0.322882	0.275443	0.320082	0.2364	0.208445	0.21732	0.535607	0.410245	0.479051	0.306136	0.220722	0.474967	0.0266175	0.0142847	0.0627803	0.720992	1.55149	0.464709	0.00805911	0.0127623	0.00239078
P60060	0.439414	0.265211	0.444899	0.18635	0.279406	0.189782	0.525126	0.464161	0.455419	0.383175	0.218513	0.481568	0.102196	0.0527633	0.0379742	0.570269	1.25679	0.453752	0.0682301	0.19305	0.00218184
Q91YJ2	0.549387	0.359884	0.366107	0.295099	0.179909	0.31588	0.603514	0.570797	0.604051	0.425126	0.263629	0.592787	0.107658	0.0732445	0.019046	0.62012	1.39438	0.444728	0.098179	0.056617	0.00166285
Q61576	0.976185	0.683408	0.620581	0.563889	0.427369	0.608023	1.43964	1.05664	1.37719	0.760058	0.533094	1.29116	0.189789	0.0941817	0.205488	0.701386	1.69876	0.412881	0.137126	0.0302559	0.00437087
Q9JIG8	1.29396	0.975822	0.898337	0.786644	0.746283	0.466266	1.60411	1.45295	1.49839	1.05604	0.666398	1.51848	0.209657	0.17449	0.0775604	0.631035	1.4379	0.438857	0.0686378	0.0231038	0.00150899
Q99PL5	1.51609	0.991791	1.08507	0.727543	0.617551	0.872535	1.674	1.30551	1.66949	1.19765	0.73921	1.54967	0.279691	0.127892	0.211457	0.617217	1.29393	0.477011	0.0612059	0.157037	0.00474074
Q91W90	2.08872	1.50397	1.65001	0.867695	0.906544	1.0868	2.25616	1.65417	1.9661	1.74757	0.953678	1.95881	0.30434	0.116908	0.301063	0.545717	1.12088	0.486867	0.0135026	0.440899	0.00572842
Q9CWF2	2.14833	1.52751	1.56641	0.965181	0.855709	0.964343	1.97615	1.77168	1.83456	1.74742	0.928411	1.8608	0.347747	0.0629632	0.104725	0.531304	1.06488	0.498932	0.0159432	0.617398	0.000189385
P19324	3.35702	2.66422	2.44708	1.57327	1.50728	1.81374	4.62456	3.31007	4.28974	2.82277	1.63143	4.07479	0.475239	0.161294	0.6831	0.577953	1.44354	0.400372	0.0147128	0.0596732	0.00381332
P35459	4.94607	4.47553	5.7916	1.98898	3.23883	3.40206	5.69054	5.98471	5.67248	5.07107	2.87663	5.78258	0.666877	0.773043	0.175284	0.567262	1.14031	0.497464	0.0204223	0.148424	0.00315149
P22437	0.401696	0.365413	0.513678	0.656677	0.650832	0.583818	0.272431	0.276231	0.284138	0.426929	0.630442	0.2776	0.0772863	0.0404835	0.0059725	1.47669	0.650226	2.27104	0.0156016	0.0289262	0.000117093
P18653	0.497423	0.503264	0.572555	1.17789	0.848135	1.04662	0.51865	0.525615	0.386784	0.524414	1.02421	0.477016	0.0417937	0.166014	0.0782209	1.95306	0.909617	2.14713	0.00719706	0.407001	0.00667743
Q3U5Q7	0.579831	0.421285	0.464417	0.729963	0.566962	0.773002	0.286252	0.346407	0.344571	0.488511	0.689976	0.325743	0.0819733	0.108685	0.0342128	1.41241	0.666809	2.11816	0.0624198	0.0337332	0.00520159
Q8C0I1	0.675537	0.553878	0.568934	1.11268	1.14228	0.650948	0.522123	0.456826	0.37495	0.59945	0.968639	0.4513	0.0663218	0.275525	0.073742	1.61588	0.752857	2.14633	0.087026	0.0608588	0.034794
Q8BXC6	1.2592	1.21577	1.0925	2.14959	1.18659	1.84349	0.609862	0.746058	0.56918	1.18916	1.72656	0.6417	0.0864773	0.492034	0.0926373	1.45191	0.539625	2.6906	0.135899	0.00170596	0.0198959
O19441	1.30856	1.00106	1.05229	1.81648	2.78125	2.00544	0.940645	1.04471	1.25259	1.12063	2.20106	1.07931	0.16475	0.511267	0.158825	1.96412	0.963129	2.03931	0.0252642	0.770109	0.022177
P10853	12.6843	8.94188	11.4878	25.7746	14.7187	23.576	4.81661	8.52154	6.34083	11.038	21.3564	6.55966	1.91134	5.85259	1.86213	1.93481	0.59428	3.25572	0.0439935	0.0438187	0.0139982
Q91YP0	0.262507	0.441081	0.442638	0.227302	0.206564	0.215227	0.201669	0.189394	0.125505	0.382075	0.216364	0.17219	0.103552	0.0104157	0.0408931	0.566287	0.450669	1.25655	0.0509631	0.0309276	0.144019
Q8VCR7	0.549754	0.485905	0.394178	0.210958	0.342156	0.241512	0.232235	0.204666	0.205156	0.476612	0.264875	0.214019	0.0782028	0.0686483	0.0157775	0.555746	0.449043	1.23762	0.0243545	0.00467849	0.279264
Q99JW5	0.747981	0.63844	1.01433	0.564304	0.479909	0.528205	0.365111	0.444589	0.372725	0.80025	0.524139	0.394142	0.19332	0.0423444	0.0438544	0.654969	0.492523	1.32982	0.0730365	0.0238332	0.0209537
Q99PS0	1.01529	0.953204	1.10685	0.701692	0.56353	0.846951	0.4036	0.513133	0.425999	1.02511	0.704058	0.447578	0.0772921	0.141725	0.0578669	0.68681	0.436613	1.57304	0.0261808	0.000489969	0.0440332
Q07563	1.11365	0.944866	1.04801	0.631306	0.993111	0.647152	0.396507	0.618124	0.42347	1.03551	0.75719	0.479367	0.0850852	0.204467	0.120921	0.731224	0.462929	1.57956	0.0950935	0.00286556	0.112762
Q8CHT0	1.42095	1.65436	1.76861	0.755123	0.9862	0.754545	0.794662	0.90044	0.69366	1.61464	0.831956	0.796254	0.177198	0.13358	0.103399	0.515258	0.493146	1.04484	0.00363404	0.00230196	0.732848
Q9R062	1.51082	1.98441	1.86536	1.18633	1.26893	0.963393	0.530143	0.711985	0.678178	1.78686	1.13955	0.640102	0.246363	0.158049	0.0967159	0.637738	0.358227	1.78026	0.018611	0.00168687	0.0095278
P28650	1.53638	2.65754	2.43287	1.12948	1.45049	0.875167	0.86263	0.979034	0.839006	2.20893	1.15171	0.893556	0.593178	0.288304	0.0749621	0.521389	0.40452	1.28891	0.0499995	0.0189317	0.207749
Q9Z1E4	1.64805	2.64532	2.45383	1.36947	1.35511	0.85696	1.01391	0.996835	1.00064	2.24907	1.19385	1.00379	0.529232	0.29184	0.00896112	0.530818	0.446316	1.18933	0.0390036	0.0151619	0.322619
P41216	1.68485	2.75399	2.65969	1.2899	1.41779	0.975998	1.09358	1.2271	0.982378	2.36618	1.2279	1.10102	0.59193	0.227329	0.122528	0.518937	0.465315	1.11524	0.0358957	0.0222554	0.442727
P28843	1.71367	2.26045	2.066	1.00619	1.66433	1.08552	0.880291	1.04342	0.743071	2.01337	1.25201	0.888926	0.277163	0.359275	0.150359	0.621848	0.441511	1.40846	0.0438448	0.00349012	0.181672
Q9CQ69	2.7197	3.31942	3.61532	1.91348	1.94241	1.62846	1.54271	1.80249	1.30864	3.21815	1.82811	1.55128	0.45632	0.173512	0.247039	0.568064	0.482042	1.17845	0.00786352	0.0051104	0.187415
P10649	2.87341	3.24518	3.00065	2.20453	2.52129	2.27111	1.31039	1.34371	1.32689	3.03975	2.33231	1.327	0.188944	0.167011	0.0166617	0.767271	0.436548	1.75758	0.00828532	9.76004e-05	0.000487363
Q2VIS4	3.10408	3.26972	3.03579	2.12395	1.75524	2.21398	0.910398	1.42072	1.01112	3.13653	2.03106	1.11408	0.120294	0.243068	0.270293	0.647548	0.355194	1.82308	0.00212298	0.000291288	0.0119756
P12787	3.19582	3.89407	4.18095	1.85005	2.65563	1.6797	1.62829	1.90667	2.07694	3.75695	2.06179	1.87063	0.506678	0.521282	0.226484	0.548794	0.497913	1.10219	0.015618	0.00416256	0.591456
P40240	3.50318	2.84111	3.01203	2.30776	2.51353	2.23983	1.55933	1.54742	1.4126	3.11877	2.35371	1.50645	0.343702	0.142515	0.0814929	0.75469	0.483026	1.56242	0.0235556	0.00138477	0.000866207
Q9CQ89	3.7081	3.46276	3.43465	1.62248	2.82961	2.17321	1.45413	1.73977	1.89624	3.53517	2.20844	1.69671	0.150418	0.604337	0.224176	0.624704	0.479952	1.3016	0.0210208	0.000295656	0.241103
P08228	4.56785	3.71873	3.52408	1.48417	2.62446	2.28953	1.69251	1.95846	1.8491	3.93689	2.13272	1.83336	0.55503	0.586094	0.133674	0.541728	0.465687	1.16329	0.0179734	0.00309322	0.437032
Q3UPI1	366.131	279.759	234.896	192.877	325.452	246.174	118.104	131.769	144.317	293.595	254.835	131.397	66.7025	66.7103	13.1103	0.867979	0.447544	1.93943	0.515983	0.014462	0.0346884
Q9CWI3	0.125983	0.0967011	0.162332	0.18097	0.128966	0.22573	0.320036	0.253542	0.312783	0.128339	0.178555	0.295454	0.0328786	0.0484273	0.0364768	1.39128	2.30214	0.604343	0.211484	0.00414367	0.0288464
Q8BJW6	0.246767	0.176176	0.283711	0.526071	0.390488	0.415756	0.649281	0.415502	0.484424	0.235552	0.444105	0.516402	0.0546378	0.0720999	0.120126	1.88538	2.19231	0.859998	0.0162238	0.0210905	0.421949
Q80UM3	0.253699	0.322433	0.364716	0.584883	0.503234	0.542698	0.675037	0.509426	0.700341	0.313616	0.543605	0.628268	0.0560308	0.0408318	0.103695	1.73335	2.0033	0.865244	0.00454772	0.00985228	0.25858
P70158	0.294091	0.230085	0.257039	0.364047	0.365462	0.458912	0.632608	0.431937	0.529125	0.260405	0.39614	0.531223	0.0321354	0.0543665	0.100352	1.52125	2.03999	0.745713	0.0204269	0.0112331	0.109692
P28667	0.592554	0.420981	0.357283	0.616727	0.639389	0.86674	1.13317	0.827988	1.16488	0.456939	0.707619	1.04201	0.121688	0.138268	0.186029	1.54861	2.28042	0.679087	0.0778929	0.0103489	0.0668517
Q8R016	0.652497	0.692508	0.760261	0.961962	0.876391	1.16356	1.67376	1.22771	1.69652	0.701756	1.00064	1.53266	0.0544738	0.147438	0.264341	1.4259	2.18404	0.652874	0.030115	0.00595587	0.038234
O08915	0.726474	0.770275	0.832604	0.993651	0.710922	1.19437	1.61828	1.54396	1.62004	0.776451	0.966313	1.59409	0.0533342	0.242878	0.0434273	1.24452	2.05305	0.606184	0.256561	3.286e-05	0.0116275
P08101	0.826574	0.472043	0.605495	0.779274	0.915074	1.16647	1.09365	1.66425	1.46556	0.634704	0.953606	1.40782	0.179061	0.196452	0.289648	1.50244	2.21807	0.677364	0.106266	0.0170692	0.0878524
Q80UG5	0.828875	0.925969	1.06153	1.53085	1.33665	1.50761	2.04431	1.75603	1.85822	0.93879	1.45837	1.88618	0.116855	0.10605	0.14616	1.55346	2.00916	0.773187	0.00467293	0.000932433	0.0148119
Q9CXW4	0.835929	0.827363	0.741167	1.21269	1.23098	1.14075	1.72916	1.47135	1.64721	0.801486	1.1948	1.61591	0.0524133	0.047702	0.131723	1.49074	2.01614	0.739401	0.000654775	0.000572967	0.00648808
P01029	0.841273	0.664731	0.603284	1.00358	1.46456	1.12179	1.2124	1.35343	1.74291	0.703096	1.19664	1.43625	0.123546	0.23943	0.274783	1.70196	2.04275	0.833172	0.0337655	0.013533	0.318399
P60867	1.09081	1.08019	1.05182	2.62113	1.61443	2.051	2.30939	2.14116	2.01717	1.07427	2.09552	2.15591	0.0201544	0.504826	0.14667	1.95064	2.00685	0.97199	0.0248715	0.000224561	0.852001
A0A075B5K6	1.15673	1.05607	0.915437	1.42382	1.01755	1.32655	2.15651	1.79246	2.75021	1.04274	1.25597	2.23306	0.121196	0.21213	0.483444	1.20448	2.14152	0.562444	0.205152	0.0144166	0.0327249
P62827	1.23791	1.56293	1.30929	2.7215	2.3225	2.88985	3.1226	2.69987	3.16429	1.37005	2.64462	2.99559	0.170814	0.291384	0.256947	1.93031	2.18649	0.882838	0.00283127	0.000800178	0.192689
P15532	1.43125	1.52807	1.3382	2.66219	2.6516	3.01026	3.20313	2.29912	3.31005	1.43251	2.77468	2.93743	0.0949396	0.204081	0.555375	1.93694	2.05055	0.944594	0.000495891	0.00983443	0.658629
Q05816	1.63406	1.24837	1.15192	1.73246	2.28293	2.28917	4.15919	2.58882	4.57555	1.34479	2.10152	3.77452	0.255121	0.319633	1.04773	1.56272	2.80678	0.556764	0.0327468	0.017502	0.0572593
P35979	1.9828	2.10416	2.17438	2.80106	2.95841	2.72924	4.71714	3.98772	4.69697	2.08711	2.82957	4.46728	0.0969192	0.117215	0.415433	1.35573	2.14041	0.6334	0.00107206	0.000641412	0.00277502
Q3UV17	2.06088	2.21387	1.54536	4.5726	2.66874	4.33458	6.33395	4.21295	5.79436	1.94004	3.85864	5.44709	0.350258	1.03733	1.10232	1.98895	2.80773	0.708386	0.0385844	0.00628945	0.143271
G3UXL2	0.133433	0.219049	0.237176	0.257879	0.216898	0.244883	0.190173	0.169025	0.232463	0.196553	0.239886	0.19722	0.0554098	0.0209425	0.0323009	1.22047	1.0034	1.21634	0.273875	0.98648	0.127318
Q99LG2	0.144749	0.193485	0.259703	0.132003	0.115276	0.174843	0.212556	0.190425	0.204752	0.199313	0.140707	0.202577	0.0576981	0.0307228	0.0112247	0.705963	1.01638	0.694586	0.195414	0.927987	0.0306096
Q80WQ2	0.147056	0.131102	0.100708	0.195336	0.233639	0.171437	0.142681	0.186646	0.184192	0.126289	0.200137	0.171173	0.0235456	0.031378	0.0247053	1.58476	1.35541	1.16921	0.0310653	0.0849801	0.277413
P97760	0.152173	0.19686	0.224057	0.217383	0.176886	0.230821	0.267019	0.244275	0.167417	0.19103	0.208363	0.226237	0.0362953	0.0280764	0.0521934	1.09074	1.1843	0.920995	0.548654	0.391766	0.629009
P35123	0.163888	0.18988	0.21982	0.331509	0.298726	0.248214	0.317866	0.272962	0.345428	0.191196	0.292816	0.312086	0.0279893	0.0419605	0.036577	1.5315	1.63228	0.938256	0.025132	0.0104475	0.581096
Q8R180	0.193462	0.28235	0.342109	0.49031	0.376711	0.444653	0.303781	0.188742	0.350416	0.272641	0.437224	0.28098	0.0747977	0.0571628	0.0832137	1.60367	1.03059	1.55607	0.0388517	0.903517	0.0551935
Q9CS42	0.201141	0.270514	0.292563	0.340067	0.296394	0.310098	0.320912	0.200067	0.299088	0.254739	0.315519	0.273356	0.0477088	0.0223354	0.0644011	1.2386	1.07308	1.15424	0.116325	0.708028	0.34434
Q9JK48	0.210511	0.198323	0.305553	0.22969	0.170024	0.298681	0.301949	0.320398	0.24369	0.238129	0.232798	0.288679	0.0587082	0.064385	0.0400388	0.977615	1.21228	0.806426	0.920715	0.285383	0.270831
Q5SW19	0.214826	0.220194	0.29301	0.279685	0.242281	0.208981	0.358139	0.277793	0.324811	0.242677	0.243649	0.320247	0.0436722	0.0353719	0.040367	1.00401	1.31965	0.760815	0.977528	0.086756	0.0688048
P13864	0.215434	0.272725	0.277158	0.459012	0.427066	0.54909	0.242005	0.356062	0.411702	0.255106	0.47839	0.33659	0.0344284	0.0632778	0.0865082	1.87526	1.31941	1.42128	0.00581285	0.204148	0.0837193
Q9JLQ0	0.224286	0.257759	0.312748	0.211451	0.293838	0.356427	0.382112	0.448935	0.388805	0.264931	0.287239	0.406617	0.0446649	0.0727131	0.0368009	1.0842	1.5348	0.706411	0.674179	0.0132586	0.0641719
Q60790	0.228228	0.196413	0.204085	0.365314	0.498619	0.344411	0.255345	0.361522	0.32693	0.209575	0.402781	0.314599	0.016603	0.0836533	0.054152	1.92189	1.50113	1.2803	0.0171924	0.0325389	0.200118
Q3TL44	0.236723	0.393121	0.4202	0.35218	0.325028	0.328535	0.205399	0.290854	0.285315	0.350015	0.335248	0.260523	0.0990434	0.0147685	0.0478186	0.957811	0.74432	1.28683	0.810997	0.231527	0.0609338
Q9CWL8	0.239223	0.280103	0.340182	0.571988	0.436949	0.644132	0.492957	0.379675	0.488624	0.286503	0.551023	0.453752	0.0507826	0.105171	0.0641891	1.92327	1.58376	1.21437	0.0172045	0.0240288	0.243301
P60670	0.240023	0.233315	0.286973	0.389757	0.360348	0.350788	0.447486	0.371374	0.288638	0.253437	0.366964	0.369166	0.0292361	0.0203094	0.0794469	1.44795	1.45664	0.994037	0.00524589	0.0770047	0.965141
Q569Z5	0.254798	0.223609	0.208248	0.378332	0.311188	0.30717	0.30707	0.300732	0.303959	0.228885	0.33223	0.303921	0.0237193	0.039976	0.00316919	1.45151	1.32783	1.09315	0.0182898	0.00557603	0.288547
Q60996	0.2575	0.347505	0.3398	0.639961	0.440549	0.585659	0.450531	0.385448	0.593712	0.314935	0.55539	0.476563	0.0498894	0.103094	0.106545	1.76351	1.51321	1.16541	0.0220349	0.0760244	0.409212
Q99PP9	0.258145	0.309767	0.237786	0.250174	0.349795	0.388964	0.471012	0.408367	0.36448	0.268566	0.329644	0.414619	0.0371049	0.0715558	0.0535405	1.22742	1.54383	0.795053	0.259602	0.0177892	0.174926
Q9ER88	0.258289	0.331148	0.34756	0.277192	0.196185	0.189017	0.437998	0.494892	0.2839	0.312332	0.220798	0.405597	0.047517	0.0489702	0.109164	0.706934	1.29861	0.544378	0.0808274	0.24636	0.0555019
Q99104	0.260361	0.308403	0.284035	0.291023	0.345261	0.399004	0.280581	0.38372	0.334622	0.284267	0.345096	0.332974	0.0240218	0.0539907	0.0515893	1.21399	1.17134	1.03641	0.149172	0.212355	0.792525
Q91YR7	0.261697	0.327408	0.352828	0.468216	0.339023	0.533614	0.480175	0.579611	0.525551	0.313978	0.446951	0.528446	0.0470266	0.0990233	0.0497811	1.42351	1.68307	0.845784	0.103537	0.00560062	0.271789
Q80V26	0.267182	0.355908	0.249836	0.378869	0.36207	0.37299	0.475472	0.274669	0.479262	0.290975	0.37131	0.409801	0.0568984	0.00852457	0.117043	1.27609	1.40837	0.906074	0.0728824	0.188932	0.600339
Q9CT10	0.273649	0.36524	0.36063	0.371683	0.290462	0.411336	0.42699	0.40833	0.426886	0.333173	0.357827	0.420735	0.0516008	0.0616168	0.0107436	1.074	1.26281	0.85048	0.623341	0.04513	0.156458
Q9QXB9	0.273936	0.426584	0.511048	0.593839	0.615274	0.623712	0.769755	0.679894	0.719566	0.403856	0.610942	0.723072	0.120179	0.0154008	0.0450332	1.51277	1.79042	0.844926	0.0415392	0.0125649	0.0150901
Q6PB66	0.274452	0.374338	0.3835	0.204419	0.184177	0.215356	0.396641	0.372176	0.318485	0.344097	0.201317	0.362434	0.0604878	0.0158193	0.0399784	0.58506	1.05329	0.555459	0.0167418	0.683968	0.00290547
Q80UJ7	0.274512	0.324046	0.211585	0.238451	0.277003	0.262533	0.378964	0.313205	0.356716	0.270048	0.259329	0.349628	0.0563633	0.0194751	0.0334478	0.960307	1.29469	0.741728	0.771097	0.103294	0.0155917
Q9CZV8	0.276283	0.252969	0.298665	0.21079	0.272721	0.23289	0.258661	0.329241	0.288397	0.275972	0.238801	0.2921	0.0228495	0.0313857	0.0354355	0.865307	1.05844	0.817532	0.172574	0.543877	0.122926
Q2TPA8	0.278312	0.342814	0.365864	0.22874	0.285137	0.181786	0.306307	0.231479	0.304294	0.328997	0.231888	0.280693	0.0453823	0.051747	0.0426327	0.704833	0.85318	0.826124	0.0709223	0.250224	0.275904
Q80X50	0.279541	0.302424	0.334271	0.370715	0.304773	0.330506	0.58323	0.493497	0.491506	0.305412	0.335331	0.522744	0.0274871	0.0332349	0.0523914	1.09797	1.7116	0.641483	0.295805	0.00312829	0.00637527
Q9QXK3	0.280263	0.436772	0.498871	0.516988	0.323174	0.501583	0.504605	0.467625	0.636455	0.405302	0.447249	0.536228	0.112651	0.107727	0.0887465	1.1035	1.32303	0.834064	0.665381	0.18897	0.331463
Q8BYA0	0.283833	0.370555	0.276258	0.414004	0.408127	0.505351	0.610257	0.51721	0.402922	0.310215	0.442494	0.51013	0.052393	0.0545149	0.103849	1.42641	1.64444	0.867415	0.0387734	0.0408648	0.374411
Q8C0D5	0.284126	0.215866	0.253424	0.263247	0.200427	0.319878	0.412783	0.344145	0.277627	0.251138	0.261184	0.344852	0.0341871	0.0597523	0.0675807	1.04	1.37315	0.757382	0.812914	0.0987335	0.183447
Q8R307	0.285558	0.30035	0.260705	0.194037	0.228983	0.265417	0.334299	0.354431	0.291869	0.282204	0.229479	0.326866	0.0200343	0.0356928	0.0319364	0.813166	1.15826	0.702058	0.0894971	0.109455	0.0244085
Q91YP2	0.294172	0.307927	0.315488	0.388762	0.270865	0.438329	0.557018	0.410214	0.531376	0.305862	0.365985	0.499536	0.010807	0.0860239	0.0784105	1.19657	1.63321	0.73265	0.295965	0.0132837	0.117813
Q3TYX3	0.296695	0.384386	0.42124	0.484706	0.407125	0.414447	0.490672	0.527747	0.547601	0.36744	0.435426	0.522006	0.063978	0.0428344	0.0288954	1.18502	1.42066	0.834139	0.200899	0.0188819	0.0440147
Q3UQ44	0.298794	0.346052	0.348688	0.482216	0.398148	0.599887	0.378158	0.530843	0.394705	0.331178	0.493417	0.434568	0.0280766	0.101335	0.0837856	1.48989	1.31219	1.13542	0.0556688	0.112651	0.481496
Q8K4L3	0.301243	0.49827	0.528001	0.473171	0.352004	0.321473	0.382746	0.375216	0.222775	0.442504	0.382216	0.326912	0.123236	0.0802347	0.0902642	0.863756	0.738778	1.16917	0.516849	0.260162	0.47208
Q9QZE7	0.303116	0.254415	0.271844	0.271081	0.290798	0.347486	0.27451	0.282891	0.271642	0.276458	0.303122	0.276348	0.0246766	0.0396654	0.00584515	1.09645	0.999599	1.09688	0.378826	0.994328	0.311795
P42230	0.303746	0.300846	0.242069	0.391627	0.25922	0.293127	0.261854	0.353715	0.265266	0.28222	0.314658	0.293611	0.0348023	0.0687794	0.0520788	1.11494	1.04036	1.07168	0.506464	0.76852	0.694352
Q9R1T2	0.304722	0.329234	0.347232	0.415442	0.406638	0.4027	0.517316	0.374158	0.462085	0.327062	0.40826	0.451187	0.0213379	0.00652421	0.0721987	1.24826	1.37951	0.904858	0.00323889	0.0461322	0.363036
Q8BRN9	0.307276	0.233637	0.404243	0.341852	0.276804	0.447092	0.393817	0.360067	0.438073	0.315052	0.355249	0.397319	0.0855688	0.085931	0.0391209	1.12759	1.26112	0.894116	0.596626	0.204481	0.48332
A2AN08	0.309981	0.319824	0.351046	0.421576	0.400543	0.371174	0.365912	0.380238	0.374873	0.32695	0.397764	0.373674	0.0214402	0.0253156	0.00723815	1.21659	1.14291	1.06447	0.0208867	0.0232437	0.188219
Q6GQT9	0.313501	0.333527	0.383766	0.406243	0.361765	0.359028	0.406873	0.390843	0.501574	0.343598	0.375679	0.433097	0.0361989	0.0265045	0.0598422	1.09337	1.26047	0.867424	0.283246	0.0909708	0.203259
Q8JZZ7	0.31505	0.267443	0.318883	0.238655	0.270589	0.241687	0.321433	0.223326	0.23046	0.300459	0.25031	0.258407	0.0286568	0.0176271	0.0546988	0.833094	0.860039	0.968669	0.0612162	0.303551	0.819229
P35235	0.316928	0.337559	0.393879	0.389415	0.224002	0.363877	0.315542	0.343702	0.442883	0.349455	0.325765	0.367376	0.0398306	0.0890492	0.06689	0.932207	1.05128	0.886735	0.69564	0.710484	0.552818
O70310	0.319761	0.378827	0.332789	0.523771	0.411762	0.407548	0.464849	0.460453	0.509702	0.343792	0.447694	0.478335	0.0310325	0.0659186	0.0272534	1.30222	1.39135	0.935942	0.0689436	0.00485771	0.498191
Q9QZH3	0.321673	0.297637	0.347111	0.276479	0.366137	0.337045	0.219528	0.234711	0.243496	0.322141	0.326554	0.232578	0.0247402	0.0457403	0.0121255	1.0137	0.721978	1.40406	0.890248	0.00489538	0.0262995
O70591	0.322064	0.394013	0.314247	0.333241	0.338053	0.41118	0.223239	0.321224	0.347373	0.343441	0.360825	0.297279	0.0439705	0.0436755	0.0654397	1.05061	0.865588	1.21376	0.65251	0.367867	0.234388
P52633	0.328129	0.274414	0.307115	0.572865	0.488624	0.519606	0.438857	0.340753	0.446795	0.303219	0.527032	0.408802	0.0270688	0.0426089	0.0590657	1.73812	1.3482	1.28921	0.00154627	0.0480905	0.0482315
O70589	0.329552	0.285756	0.33428	0.344765	0.247147	0.286772	0.506828	0.369262	0.348818	0.316529	0.292895	0.408302	0.0267553	0.049096	0.085936	0.925333	1.28994	0.717348	0.504672	0.152133	0.113539
Q8VEE4	0.332496	0.54118	0.396502	0.678764	0.463812	0.621532	0.820642	0.69885	0.734476	0.423393	0.588036	0.751323	0.106909	0.111322	0.0626194	1.38887	1.77453	0.782667	0.13837	0.0101501	0.091189
B1AZI6	0.332726	0.368274	0.243667	0.342332	0.325791	0.45379	0.193672	0.298379	0.226536	0.314889	0.373971	0.239529	0.0641899	0.0696184	0.0535487	1.18763	0.760679	1.56128	0.340649	0.193443	0.0569079
Q9CW03	0.338175	0.239334	0.304652	0.60637	0.503572	0.506342	0.328806	0.286339	0.33933	0.294054	0.538761	0.318158	0.0502657	0.0585672	0.0280542	1.83219	1.08197	1.69338	0.00535742	0.508443	0.00417041
Q8VBW6	0.339227	0.396082	0.423463	0.235993	0.299323	0.328268	0.443508	0.388407	0.338023	0.386257	0.287861	0.389979	0.0429688	0.047193	0.0527602	0.745258	1.00964	0.738145	0.0557903	0.929079	0.0668618
B1AUN2	0.340661	0.315879	0.299706	0.31827	0.422165	0.377583	0.438007	0.400849	0.488816	0.318748	0.372673	0.442557	0.0206277	0.0521211	0.0441596	1.16918	1.38842	0.84209	0.170996	0.0116934	0.151106
Q3TKT4	0.343937	0.271	0.45264	0.404331	0.369168	0.321393	0.325439	0.285973	0.344512	0.355859	0.364964	0.318641	0.0914047	0.0416288	0.0298556	1.02559	0.895415	1.14538	0.882837	0.539327	0.192363
E9PVA8	0.344138	0.436053	0.355411	0.47274	0.477713	0.474537	0.580443	0.356211	0.522938	0.378534	0.474997	0.48653	0.0501304	0.00251844	0.116465	1.25483	1.2853	0.976294	0.0291417	0.214174	0.872165
O88712	0.345496	0.346648	0.302738	0.440261	0.33913	0.505727	0.603336	0.364424	0.457861	0.331627	0.428373	0.475207	0.0250256	0.0839323	0.120397	1.29173	1.43295	0.901445	0.128266	0.113196	0.609894
Q8K4Z5	0.34581	0.260108	0.309644	0.440946	0.29791	0.449533	0.386377	0.391412	0.428763	0.305187	0.39613	0.402184	0.0430245	0.0851694	0.0231555	1.29799	1.31783	0.984946	0.174128	0.0263303	0.911153
O88653	0.34631	0.296621	0.260507	0.431363	0.38753	0.458111	0.3377	0.445455	0.444435	0.301146	0.425668	0.409197	0.0430797	0.0356337	0.06192	1.41349	1.3588	1.04025	0.0181815	0.0681352	0.710048
Q64737	0.348864	0.419802	0.343492	0.570258	0.403166	0.438989	0.790882	0.529903	0.775035	0.37072	0.470804	0.698607	0.0425917	0.0879723	0.146317	1.26997	1.88446	0.673919	0.150806	0.0203545	0.0819338
P32067	0.34887	0.254285	0.287088	0.476634	0.388809	0.262666	0.326864	0.229036	0.310355	0.296748	0.376036	0.288752	0.0480263	0.107554	0.0523697	1.26719	0.973054	1.30228	0.308431	0.854961	0.274942
Q9DBL9	0.35313	0.472658	0.391969	0.823167	0.618642	0.806222	0.494122	0.445235	0.606908	0.405919	0.749344	0.515422	0.0609725	0.113508	0.0829145	1.84604	1.26977	1.45385	0.00990688	0.13914	0.0449057
P43247	0.354308	0.336376	0.334547	0.572586	0.377974	0.455165	0.492933	0.461308	0.478975	0.341744	0.468575	0.477739	0.0109193	0.0979967	0.0158489	1.37113	1.39794	0.980819	0.0898194	0.000255926	0.880721
D3Z7P3	0.35529	0.337271	0.375036	0.363233	0.29942	0.274488	0.256644	0.278361	0.313177	0.355866	0.31238	0.282727	0.0188889	0.04577	0.0285185	0.877805	0.794478	1.10488	0.20287	0.0207746	0.394828
Q8CFI7	0.355815	0.314383	0.292087	0.430561	0.420852	0.528069	0.369838	0.43005	0.375011	0.320761	0.459827	0.391633	0.0323393	0.059298	0.0333703	1.43355	1.22095	1.17413	0.0234565	0.0574841	0.157592
Q9QXZ0	0.356517	0.357422	0.414084	0.362976	0.424027	0.354237	0.440467	0.379747	0.391471	0.376008	0.380414	0.403895	0.0329781	0.0380225	0.0322106	1.01172	1.07417	0.941863	0.886821	0.353864	0.460225
E9Q912	0.357123	0.371501	0.357612	0.29315	0.340567	0.387081	0.509757	0.379536	0.42	0.362078	0.340266	0.436431	0.00816363	0.0469661	0.0666471	0.939757	1.20535	0.779655	0.472401	0.127569	0.110579
Q8VIM9	0.359015	0.338842	0.260305	0.134909	0.230317	0.236223	0.368882	0.202545	0.279937	0.319387	0.200483	0.283788	0.0521514	0.0568651	0.0832352	0.627711	0.888539	0.706453	0.0558543	0.564224	0.22558
P58742	0.359623	0.369415	0.362818	0.596182	0.342421	0.599041	0.474789	0.349995	0.476035	0.363952	0.512548	0.433606	0.00499369	0.147341	0.0724123	1.40828	1.19138	1.18206	0.155778	0.171821	0.45177
Q8VD65	0.365005	0.254444	0.404881	0.361854	0.353807	0.381008	0.346228	0.377169	0.291702	0.341443	0.365557	0.338366	0.0779373	0.0139732	0.0432724	1.07062	0.990988	1.08036	0.625767	0.955195	0.358856
Q505F5	0.365393	0.276926	0.232932	0.515375	0.297479	0.404866	0.326415	0.296255	0.246755	0.29175	0.405907	0.289808	0.0674634	0.108952	0.0402191	1.39128	0.993344	1.4006	0.197713	0.967897	0.158412
Q91ZW3	0.365812	0.293883	0.476774	0.747283	0.613251	0.729014	0.553336	0.539801	0.61554	0.378823	0.696516	0.569559	0.0921372	0.0726861	0.0403915	1.83863	1.5035	1.2229	0.00938615	0.0303899	0.0573151
Q68FL4	0.368519	0.631016	0.42341	0.651036	0.374066	0.515143	0.541892	0.438812	0.513388	0.474315	0.513415	0.498031	0.138455	0.138493	0.0532281	1.08243	1.05	1.03089	0.746898	0.795563	0.8662
Q920B9	0.369647	0.489658	0.461346	0.70343	0.665167	0.673164	0.520089	0.563379	0.527689	0.440217	0.680587	0.537052	0.0627331	0.0201831	0.0231143	1.54603	1.21997	1.26726	0.00321112	0.0661464	0.00126173
Q9JHQ0	0.371334	0.405927	0.558849	0.189054	0.276734	0.261783	0.437427	0.239464	0.372722	0.44537	0.242524	0.349871	0.0997864	0.0469057	0.10094	0.544544	0.785573	0.69318	0.0333292	0.308625	0.170153
P24547	0.373871	0.385114	0.410113	0.65439	0.698277	0.566883	0.627586	0.587452	0.646509	0.389699	0.63985	0.620515	0.0185511	0.066893	0.0301567	1.64191	1.59229	1.03116	0.00335807	0.000350565	0.671787
Q91WQ3	0.373966	0.464043	0.462605	0.520684	0.524488	0.452917	0.589912	0.55255	0.604233	0.433538	0.499363	0.582232	0.0515958	0.0402685	0.0266836	1.15183	1.34298	0.85767	0.156478	0.0113889	0.0410922
Q99MR6	0.375615	0.494378	0.525266	0.767149	0.619617	0.565248	0.535393	0.517235	0.45047	0.465086	0.650671	0.501033	0.0790086	0.104472	0.0447202	1.39903	1.07729	1.29866	0.0701373	0.530527	0.0847199
Q9JMH9	0.375992	0.469249	0.52248	0.584535	0.448165	0.498155	0.558998	0.513385	0.462267	0.455907	0.510285	0.51155	0.0741497	0.0689894	0.0483919	1.11927	1.12205	0.997527	0.405037	0.337577	0.980502
A2A8Z1	0.376368	0.369835	0.34713	0.586134	0.499072	0.637706	0.542064	0.729732	0.482401	0.364444	0.574304	0.584732	0.0153464	0.0700703	0.129068	1.57584	1.60445	0.982166	0.00714358	0.0425792	0.908049
Q8CJG0	0.377893	0.481273	0.50306	0.465026	0.413652	0.508776	0.505399	0.393506	0.425408	0.454075	0.462485	0.441437	0.0668689	0.0476132	0.0576429	1.01852	0.972168	1.04768	0.867783	0.816391	0.651352
Q99KD5	0.380973	0.424022	0.418473	0.520528	0.393106	0.432726	0.46922	0.322399	0.4561	0.407823	0.448787	0.415906	0.0234178	0.0652118	0.0812452	1.10045	1.01982	1.07906	0.363721	0.876511	0.613677
Q8BGB7	0.383298	0.428454	0.3249	0.291921	0.347602	0.415912	0.454872	0.291737	0.445557	0.378884	0.351812	0.397388	0.0519178	0.0621028	0.0916154	0.928547	1.04884	0.88531	0.593454	0.77603	0.515103
Q9JIA7	0.38433	0.39565	0.429138	0.365003	0.285667	0.229536	0.369729	0.463707	0.34935	0.403039	0.293402	0.394262	0.0233002	0.0680639	0.0609979	0.727973	0.978222	0.74418	0.0576038	0.827321	0.128541
Q99JX4	0.385087	0.395487	0.396137	0.612386	0.426284	0.558092	0.667044	0.54395	0.581716	0.392237	0.532254	0.59757	0.00620052	0.0957037	0.0630595	1.35697	1.52349	0.890697	0.0647518	0.00495102	0.379481
Q9CZN7	0.386408	0.406911	0.631307	0.654007	0.692308	0.688252	0.934218	0.852846	0.904869	0.474876	0.678189	0.897311	0.135861	0.0210403	0.0412092	1.42814	1.88957	0.755802	0.062542	0.00672746	0.00120366
Q8CGE8	0.39179	0.324439	0.304549	0.248931	0.415057	0.277844	0.258678	0.391418	0.410227	0.340259	0.313944	0.353441	0.0457217	0.0887518	0.082604	0.922661	1.03874	0.88825	0.671692	0.820809	0.602729
Q8BP47	0.392052	0.381973	0.385771	0.62967	0.567157	0.580749	0.776513	0.604622	0.66284	0.386599	0.592525	0.681325	0.00509023	0.032878	0.0874236	1.53266	1.76236	0.869666	0.000429022	0.00431468	0.174961
Q9JIF0	0.392801	0.395542	0.419429	0.578824	0.521337	0.585204	0.799205	0.639729	0.651927	0.40259	0.561789	0.696954	0.0146467	0.0351769	0.0887619	1.39543	1.73117	0.806063	0.00193505	0.00478024	0.0702932
Q9JHS4	0.39415	0.466984	0.311885	0.626308	0.552183	0.666517	0.789357	0.794372	0.621891	0.391006	0.615003	0.735207	0.0775971	0.0579992	0.0981664	1.57287	1.88029	0.836503	0.016066	0.00887674	0.141887
Q8BH69	0.397383	0.366735	0.345781	0.398018	0.326613	0.479007	0.443746	0.322406	0.426115	0.369966	0.401213	0.397422	0.0259527	0.0762469	0.0655612	1.08446	1.07421	1.00954	0.538432	0.537002	0.95108
Q64521	0.398381	0.654846	0.53944	0.640509	0.545324	0.479396	0.354769	0.410998	0.391565	0.530889	0.555076	0.385778	0.128446	0.0809981	0.0285579	1.04556	0.726663	1.43885	0.796303	0.128726	0.0269217
Q62419	0.398989	0.368271	0.304285	0.423874	0.466181	0.438955	0.677999	0.59212	0.507352	0.357182	0.443003	0.59249	0.0483164	0.0214419	0.0853242	1.24027	1.65879	0.747697	0.0482154	0.014185	0.0422615
Q8BKC5	0.399727	0.419391	0.503405	0.612503	0.669052	0.621613	0.809155	0.630858	0.814643	0.440841	0.634389	0.751552	0.0550666	0.0303626	0.10456	1.43904	1.70481	0.844106	0.00596069	0.0103859	0.135799
Q9JI78	0.399777	0.418719	0.417978	0.473082	0.456048	0.410819	0.599207	0.646438	0.595936	0.412158	0.44665	0.61386	0.0107291	0.0321783	0.0282601	1.08368	1.48938	0.727608	0.152996	0.000320143	0.00249395
Q9ESW4	0.400124	0.450604	0.464697	0.271471	0.234313	0.254914	0.314049	0.437583	0.243578	0.438475	0.253566	0.331737	0.0339526	0.0186156	0.0982043	0.57829	0.756569	0.764359	0.00116596	0.149818	0.247007
Q62448	0.40033	0.487495	0.417746	0.622067	0.520787	0.605195	0.701027	0.605093	0.623617	0.435191	0.582683	0.643246	0.0461266	0.0542635	0.0508902	1.33891	1.47808	0.905848	0.0230232	0.00631149	0.231337
P49586	0.400814	0.282768	0.292708	0.402052	0.352148	0.358974	0.319319	0.279238	0.320507	0.32543	0.371058	0.306355	0.0654732	0.0270579	0.0234911	1.14021	0.941385	1.2112	0.327106	0.659578	0.0352667
Q9EQS3	0.400834	0.270548	0.401021	0.328775	0.262983	0.409448	0.608595	0.539924	0.389401	0.357468	0.333735	0.51264	0.075275	0.0733587	0.112115	0.933609	1.43409	0.651013	0.715674	0.117417	0.081782
Q3UHD6	0.405219	0.474119	0.367892	0.451664	0.439033	0.566414	0.415952	0.446351	0.500857	0.415743	0.485703	0.454386	0.0538898	0.070182	0.0430189	1.16828	1.09295	1.06892	0.242714	0.38668	0.545934
Q9WUR2	0.405844	0.551513	0.559621	0.421938	0.435612	0.327593	0.379798	0.51715	0.377099	0.505659	0.395048	0.424682	0.0865378	0.0588162	0.0800904	0.781252	0.839858	0.930219	0.141061	0.300024	0.632711
Q8R1V4	0.406746	0.655016	0.472181	0.46944	0.374937	0.484886	0.457069	0.305799	0.548093	0.511314	0.443087	0.436987	0.128678	0.0595233	0.122389	0.866565	0.854635	1.01396	0.45144	0.508628	0.941844
Q8CIF6	0.409428	0.398358	0.423895	0.591385	0.465901	0.544279	0.541821	0.741137	0.547422	0.410561	0.533855	0.610127	0.0128063	0.0633886	0.113493	1.30031	1.48608	0.87499	0.0298712	0.0389162	0.366984
Q9QZM0	0.411049	0.374373	0.459104	0.267673	0.332212	0.411166	0.552363	0.560704	0.572808	0.414842	0.337017	0.561958	0.0424925	0.0718668	0.0102801	0.812399	1.35463	0.599719	0.181711	0.00431678	0.00582035
Q64514	0.412272	0.418988	0.396401	0.681859	0.5928	0.637733	0.772757	0.623161	0.756266	0.40922	0.637464	0.717394	0.0115987	0.0445301	0.0820243	1.55775	1.75308	0.888582	0.00100855	0.00298527	0.212134
D4AFX7	0.412382	0.323733	0.359263	0.59483	0.420964	0.599486	0.512606	0.622081	0.559921	0.365126	0.538426	0.564869	0.0446143	0.101753	0.0549053	1.47463	1.54705	0.953188	0.0540009	0.00810067	0.712234
Q9CQE8	0.412774	0.331398	0.494205	0.451783	0.304682	0.396402	0.472222	0.450237	0.55216	0.412792	0.384289	0.491539	0.0814033	0.0742952	0.0536375	0.93095	1.19077	0.781807	0.677375	0.234345	0.112566
Q8BYY4	0.413506	0.471389	0.549602	0.7697	0.721424	0.549235	0.641923	0.763267	0.887709	0.478166	0.68012	0.7643	0.0683008	0.115891	0.122896	1.42235	1.5984	0.88986	0.0600281	0.0243428	0.436735
Q9Z0N1	0.413843	0.553596	0.687725	0.873565	0.772223	0.852105	1.01721	0.821289	1.02155	0.551721	0.832631	0.953351	0.136951	0.0534039	0.11439	1.50915	1.72796	0.873373	0.0296548	0.0175637	0.173003
Q6PDI5	0.414874	0.445617	0.521291	0.495208	0.441824	0.465145	0.498579	0.482664	0.486714	0.460594	0.467393	0.489319	0.0547667	0.0267627	0.00827107	1.01476	1.06237	0.955189	0.85623	0.41982	0.246657
O88983	0.415154	0.268634	0.363141	0.359683	0.318474	0.369764	0.455056	0.494427	0.434996	0.348976	0.349307	0.461493	0.0742799	0.0271738	0.0302336	1.00095	1.32242	0.756906	0.994574	0.0719755	0.00877534
Q6PHN9	0.415205	0.458088	0.422762	0.391063	0.393529	0.418049	0.435309	0.409955	0.39744	0.432018	0.40088	0.414235	0.0228907	0.0149196	0.0192938	0.927923	0.958836	0.96776	0.119638	0.361675	0.396625
O55106	0.415752	0.389197	0.384322	0.653216	0.578919	0.678126	0.463847	0.452036	0.450651	0.396424	0.636754	0.455511	0.0169157	0.0516115	0.00725213	1.60625	1.14905	1.39789	0.00155789	0.00512115	0.00382792
Q9QYA2	0.415937	0.408323	0.508868	0.561286	0.423362	0.523541	0.512704	0.639826	0.607967	0.444376	0.502729	0.586832	0.0559817	0.0712779	0.0661439	1.13132	1.32058	0.856683	0.327259	0.0465169	0.208479
E9Q634	0.417432	0.398283	0.425418	0.524914	0.539567	0.489248	0.571316	0.593145	0.574501	0.413711	0.51791	0.579654	0.0139449	0.0258803	0.0117917	1.25186	1.40111	0.893481	0.0035692	9.52094e-05	0.0197694
Q6NZC7	0.421415	0.391554	0.434969	0.385032	0.560657	0.425106	0.439637	0.467022	0.536739	0.415979	0.456931	0.481133	0.0222122	0.0920366	0.0500654	1.09845	1.15663	0.949699	0.495405	0.108408	0.709539
Q8BU30	0.422963	0.464829	0.498657	0.799608	0.758453	0.738599	0.994311	0.789127	0.850974	0.46215	0.765553	0.878137	0.0379181	0.0311182	0.105255	1.65651	1.90011	0.871793	0.000430176	0.0029907	0.150272
Q9CSH3	0.4236	0.440594	0.501847	0.662862	0.474035	0.652808	0.574755	0.662133	0.60756	0.455347	0.596568	0.614816	0.041157	0.106236	0.0441384	1.31014	1.35021	0.97032	0.0983159	0.0102082	0.797124
B2RQC6	0.426424	0.429547	0.390932	0.713519	0.571697	0.673098	0.970004	0.655131	0.83569	0.415634	0.652771	0.820275	0.0214497	0.0730633	0.158001	1.57054	1.97355	0.795796	0.00571514	0.0117326	0.170912
Q924K8	0.428888	0.500732	0.330242	0.465708	0.350365	0.409912	0.426313	0.36156	0.378404	0.419954	0.408661	0.388759	0.0855953	0.0576814	0.0335958	0.973109	0.925717	1.05119	0.858926	0.588366	0.632798
P70227	0.431057	0.449648	0.542411	0.298088	0.40033	0.33641	0.37174	0.383067	0.329964	0.474372	0.344943	0.36159	0.0596522	0.0516523	0.0279686	0.727156	0.76225	0.95396	0.0468184	0.0413489	0.649216
P15327	0.431266	0.475289	0.408006	0.477995	0.749938	0.849972	0.752926	0.518288	0.823776	0.438187	0.692635	0.69833	0.0341712	0.192495	0.159895	1.58068	1.59368	0.991844	0.0872338	0.0510715	0.970444
Q6NZJ6	0.433372	0.452461	0.386446	0.475108	0.439962	0.478493	0.691498	0.624054	0.620078	0.424093	0.464521	0.64521	0.0339715	0.021336	0.0401359	1.09533	1.52139	0.719953	0.155831	0.00188843	0.00233216
Q61191	0.433908	0.375371	0.364189	0.510606	0.420295	0.55746	0.405525	0.37974	0.343558	0.391156	0.49612	0.376274	0.037444	0.0697206	0.0311287	1.26834	0.961953	1.31851	0.0831897	0.624563	0.0530608
Q8R4N0	0.435289	0.674699	0.599494	0.282818	0.314632	0.260733	0.367101	0.360124	0.318843	0.569827	0.286061	0.348689	0.122431	0.0270957	0.0260818	0.502014	0.611921	0.82039	0.0172527	0.037665	0.0448193
Q9R008	0.435593	0.384569	0.343119	0.242848	0.28242	0.24445	0.378733	0.304148	0.326419	0.38776	0.256573	0.336433	0.0463195	0.0223992	0.0382878	0.661678	0.867632	0.762625	0.0115439	0.213142	0.0355853
Q4PJX1	0.435653	0.489126	0.404532	0.350231	0.510285	0.567185	0.40639	0.267589	0.300687	0.443104	0.475901	0.324889	0.0427867	0.11249	0.0724961	1.07402	0.733212	1.46481	0.661527	0.071801	0.12233
O89110	0.437635	0.272619	0.394518	0.599561	0.576777	0.648361	0.486064	0.506103	0.629293	0.368257	0.608233	0.540487	0.085585	0.0365714	0.0775587	1.65165	1.46769	1.12534	0.0111093	0.0611473	0.243002
Q9DBG5	0.438314	0.403004	0.568258	0.931012	0.818618	0.932139	0.673795	0.685268	0.660713	0.469859	0.893923	0.673259	0.0870259	0.0652183	0.0122864	1.90254	1.4329	1.32776	0.00250598	0.016017	0.00450959
P62309	0.438483	0.55165	0.499405	0.987584	0.80541	0.817129	0.634241	0.912305	1.07809	0.496513	0.870041	0.874879	0.0566392	0.101964	0.224279	1.7523	1.76205	0.99447	0.00516758	0.0471974	0.974497
Q61635	0.438993	0.487333	0.489578	0.765459	0.755134	0.786739	0.461466	0.483278	0.558855	0.471968	0.769111	0.5012	0.0285789	0.0161157	0.0511081	1.62958	1.06194	1.53454	9.64656e-05	0.436001	0.000978545
Q9CXW3	0.439726	0.387515	0.32552	0.529634	0.530847	0.579576	0.652952	0.555338	0.490955	0.384254	0.546686	0.566415	0.0571732	0.0284902	0.0815646	1.42272	1.47407	0.965168	0.0116521	0.0339366	0.712644
Q9CZ42	0.440788	0.407403	0.367374	0.342623	0.258608	0.366702	0.299763	0.323488	0.366869	0.405188	0.322644	0.33004	0.0367571	0.0567489	0.0340293	0.796283	0.814536	0.977592	0.101969	0.0601439	0.855932
Q3UKJ7	0.440832	0.440866	0.557694	0.676258	0.615816	0.578587	0.495725	0.645324	0.551356	0.479797	0.623554	0.564135	0.0674609	0.0492932	0.0756141	1.29962	1.17578	1.10533	0.0407336	0.222879	0.317844
Q9JLF6	0.440883	0.305196	0.467319	0.55109	0.575697	0.480341	0.491797	0.306128	0.439758	0.404466	0.535709	0.412561	0.0869804	0.0495037	0.0957757	1.32449	1.02001	1.2985	0.0855991	0.918916	0.119018
P83741	0.443281	0.329156	0.435331	0.682353	0.698818	0.561072	0.657213	0.64642	0.622732	0.40259	0.647414	0.642121	0.0637191	0.0752263	0.0176377	1.60813	1.59498	1.00824	0.0126323	0.00329223	0.911272
Q9Z1R2	0.445834	0.606083	0.521351	0.70939	0.60743	0.813992	0.948664	0.797224	0.845391	0.524423	0.710271	0.86376	0.0801686	0.103284	0.0773731	1.35439	1.64707	0.822301	0.0695412	0.00619003	0.108447
Q61151	0.445948	0.461288	0.400468	0.391986	0.380569	0.426467	0.461016	0.399087	0.461878	0.435901	0.399674	0.44066	0.0316301	0.0238953	0.0360063	0.916892	1.01092	0.906989	0.188619	0.871787	0.175775
O88447	0.446293	0.415315	0.473477	0.433567	0.397211	0.453252	0.549542	0.611132	0.557372	0.445028	0.42801	0.572682	0.0291016	0.0284307	0.0335278	0.96176	1.28684	0.747378	0.508861	0.00759605	0.00468093
Q8R050	0.447178	0.401051	0.509672	0.690958	0.641915	0.686128	0.904025	0.678497	0.838478	0.452634	0.673	0.807	0.0545158	0.0270286	0.116013	1.48685	1.7829	0.833953	0.00329686	0.00872234	0.123181
Q80TV8	0.450018	0.463465	0.505694	0.359569	0.389465	0.378102	0.476646	0.527042	0.487437	0.473059	0.375712	0.497042	0.0290515	0.015091	0.0265353	0.794218	1.0507	0.755896	0.00674252	0.350634	0.00233342
P36552	0.450242	0.530247	0.594898	0.419054	0.419824	0.404214	0.466489	0.520751	0.460163	0.525129	0.414364	0.482468	0.0724638	0.00879888	0.0333051	0.789072	0.918761	0.858843	0.0582949	0.406619	0.0266751
Q8K1J6	0.451121	0.533233	0.5732	0.408666	0.570071	0.448169	0.451571	0.514859	0.420284	0.519185	0.475636	0.462238	0.0622403	0.0841348	0.0481811	0.91612	0.890315	1.02898	0.510939	0.278409	0.822603
P59325	0.4514	0.610822	0.533562	0.685406	0.436754	0.584614	0.622265	0.520504	0.635136	0.531928	0.568925	0.592635	0.0797235	0.125066	0.0627977	1.06955	1.11413	0.959992	0.687975	0.358689	0.783772
Q9ESX5	0.453497	0.454772	0.496858	0.61821	0.507357	0.534219	0.485882	0.651039	0.536142	0.468376	0.553262	0.557687	0.0246745	0.0578275	0.0846602	1.18124	1.19068	0.992065	0.0795058	0.154252	0.943994
Q8BK72	0.455833	0.399396	0.563803	0.391945	0.434304	0.317656	0.51284	0.346846	0.448093	0.473011	0.381302	0.435926	0.0835388	0.0590477	0.0836633	0.806116	0.921599	0.874693	0.195443	0.615794	0.407811
Q9D662	0.456874	0.349	0.380742	0.585249	0.531417	0.506883	0.563239	0.551643	0.580395	0.395539	0.541183	0.565093	0.0554381	0.0400854	0.0144652	1.36822	1.42867	0.957689	0.0210667	0.00685867	0.386185
Q7TPV4	0.45908	0.472903	0.581025	1.01387	0.93384	0.809862	1.0028	0.929448	0.935029	0.504336	0.91919	0.95576	0.0667734	0.102789	0.0408358	1.82257	1.89508	0.961738	0.00422703	0.000564275	0.597516
Q9Z1T1	0.459169	0.389942	0.372397	0.570512	0.321363	0.494274	0.585671	0.622765	0.558196	0.407169	0.462049	0.588877	0.0458794	0.127662	0.0324036	1.13478	1.44627	0.784627	0.522102	0.00498159	0.170673
Q8CIZ8	0.459608	0.42489	0.395697	0.921939	0.768517	0.804292	0.713839	0.703749	0.799486	0.426732	0.831583	0.739025	0.0319952	0.0802694	0.0526033	1.94872	1.73183	1.12524	0.00125392	0.000925785	0.170148
Q6P5F9	0.460181	0.557396	0.550795	0.634171	0.596237	0.644489	0.657134	0.592077	0.61687	0.522791	0.624966	0.622027	0.0543218	0.0254093	0.0328333	1.19544	1.18982	1.00472	0.0419289	0.0536518	0.908339
P62305	0.461493	0.484271	0.401822	0.830164	0.65208	0.87142	0.661293	0.873668	0.703578	0.449196	0.784555	0.74618	0.042578	0.116566	0.112415	1.74658	1.66115	1.05143	0.00944336	0.0128559	0.702514
Q9Z110	0.461791	0.523039	0.67483	0.605839	0.396155	0.57617	0.900281	0.750884	0.935276	0.55322	0.526055	0.862147	0.109679	0.11347	0.097932	0.950896	1.55842	0.610168	0.780437	0.0219834	0.0177842
Q9ERK4	0.461955	0.623088	0.597111	0.620672	0.606901	0.549802	0.733433	0.687942	0.625485	0.560718	0.592458	0.682287	0.0865119	0.0375777	0.0541955	1.05661	1.21681	0.868342	0.591266	0.108131	0.077729
A2A432	0.462159	0.736148	0.779939	0.738569	0.604368	0.71306	0.869936	0.741895	0.8731	0.659415	0.685332	0.82831	0.172227	0.0712677	0.0748544	1.0393	1.25613	0.827386	0.821523	0.194284	0.0746743
Q4LDD4	0.46277	0.468196	0.393744	0.182799	0.334391	0.263812	0.448437	0.445531	0.413286	0.44157	0.260334	0.435752	0.0415074	0.075856	0.0195095	0.589565	0.986824	0.597437	0.0221542	0.836841	0.0178543
Q7TMY8	0.462953	0.466034	0.38663	0.367128	0.408788	0.373851	0.406106	0.319662	0.339339	0.438539	0.383256	0.355036	0.0449807	0.0223655	0.0453092	0.873937	0.809588	1.07948	0.129319	0.0861688	0.388157
Q9D0S9	0.464692	0.750835	0.63807	0.39954	0.530418	0.424384	0.530602	0.610002	0.349397	0.617865	0.451447	0.496667	0.144137	0.0695093	0.133575	0.730656	0.803843	0.908953	0.146021	0.345599	0.630422
Q9ERG2	0.4652	0.495426	0.537529	0.316101	0.256148	0.323246	0.511428	0.375758	0.36675	0.499385	0.298498	0.417979	0.0363268	0.03685	0.081055	0.597731	0.836986	0.714147	0.00254749	0.187607	0.0807606
O88545	0.465298	0.501014	0.491648	0.448312	0.50831	0.461443	0.448258	0.439875	0.459778	0.485986	0.472689	0.449304	0.0185188	0.0315404	0.00999258	0.972638	0.924519	1.05205	0.563054	0.0391869	0.288042
P23475	0.465998	0.486881	0.457012	0.479991	0.43149	0.399409	0.411619	0.469757	0.381382	0.469964	0.436964	0.420919	0.0153247	0.0405691	0.044916	0.929782	0.895642	1.03812	0.257914	0.147962	0.669977
P58021	0.470149	0.463144	0.434841	0.759633	0.686533	0.767968	0.733247	0.74201	0.802079	0.456044	0.738045	0.759112	0.0186941	0.0448045	0.0374673	1.61836	1.66456	0.972248	0.000548938	0.000232942	0.566
Q9R0H0	0.471558	0.470558	0.525546	0.285671	0.308422	0.253121	0.329508	0.346712	0.300408	0.48922	0.282405	0.325543	0.0314627	0.0277949	0.023405	0.577255	0.665432	0.867489	0.00103528	0.00194194	0.108914
Q810B6	0.471724	0.397774	0.345065	0.503039	0.389146	0.549328	0.519388	0.535996	0.523935	0.404854	0.480504	0.52644	0.0636253	0.0824343	0.00858244	1.18686	1.30032	0.912743	0.276724	0.030496	0.391433
Q61543	0.471725	0.525276	0.52776	0.533504	0.417521	0.400536	0.731708	0.596287	0.785069	0.508253	0.45052	0.704354	0.0316588	0.0723662	0.0973183	0.886409	1.38583	0.639622	0.274235	0.0294071	0.0222534
Q61584	0.473166	0.673244	0.685974	0.471342	0.507339	0.382803	0.500371	0.60575	0.416863	0.610795	0.453828	0.507661	0.11936	0.0640886	0.0946543	0.743012	0.831149	0.893959	0.11522	0.306015	0.460461
O54833	0.473943	0.483948	0.529648	0.605896	0.566003	0.643818	0.682967	0.442258	0.724721	0.495846	0.605239	0.616649	0.0296974	0.0389115	0.152463	1.22062	1.24363	0.981497	0.017981	0.249217	0.906114
Q8C0C7	0.474601	0.493589	0.43766	0.562791	0.549106	0.492635	0.659482	0.600119	0.546988	0.468616	0.534844	0.602196	0.0284408	0.0371893	0.0562754	1.14133	1.28505	0.888156	0.0704358	0.0214033	0.158785
Q8BH79	0.475938	0.711964	0.625151	0.713042	0.50729	0.592627	0.392952	0.572491	0.487261	0.604351	0.60432	0.484235	0.11938	0.103373	0.089808	0.999948	0.801247	1.24799	0.999741	0.23614	0.203405
Q9CQ26	0.475967	0.372388	0.413971	0.55873	0.360893	0.499337	0.528011	0.644576	0.591936	0.420776	0.472987	0.588174	0.0521238	0.101517	0.0583736	1.12408	1.39783	0.804161	0.472444	0.0207455	0.16364
P15508	0.476595	0.713208	0.692566	0.47956	0.658359	0.723276	0.590734	0.752085	0.779478	0.627456	0.620398	0.707432	0.131057	0.126215	0.101988	0.988751	1.12746	0.876972	0.949657	0.451113	0.405478
Q9WTX6	0.477927	0.488215	0.418112	0.541597	0.595473	0.589498	0.729097	0.628346	0.683074	0.461418	0.575523	0.680173	0.0378554	0.0295319	0.0504383	1.24729	1.47409	0.846143	0.0146558	0.00386339	0.0361792
Q6ZQ58	0.479369	0.548429	0.742992	0.679863	0.547407	0.83647	1.061	0.770378	0.697195	0.590264	0.687913	0.842856	0.1367	0.144699	0.192425	1.16543	1.42793	0.816169	0.443375	0.137427	0.327443
Q8BMJ2	0.480955	0.427472	0.416556	0.749346	0.751544	0.703988	0.900534	0.761888	0.801738	0.441661	0.734959	0.821387	0.0344647	0.0268447	0.0713807	1.66408	1.85977	0.894779	0.00031255	0.00115197	0.121147
D3Z6V6	0.481373	0.523622	0.448345	0.298442	0.506661	0.465097	0.372281	0.456947	0.369241	0.484447	0.4234	0.39949	0.0377323	0.110194	0.0497827	0.873987	0.824632	1.05985	0.415332	0.0780321	0.749222
Q8BK63	0.48209	0.541896	0.639277	0.663916	0.651272	0.647194	0.877011	0.74647	0.82844	0.554421	0.654127	0.817307	0.0793384	0.00871928	0.0659784	1.17984	1.47416	0.800345	0.0964905	0.0115767	0.0131913
Q9DCL9	0.483603	0.551845	0.550684	0.653379	0.7902	0.712569	0.742602	0.563341	0.630235	0.528711	0.718716	0.645393	0.0390687	0.0686174	0.0905863	1.35937	1.22069	1.11361	0.014055	0.109865	0.326347
Q60715	0.484248	0.577094	0.593661	0.371756	0.493094	0.369078	0.53424	0.623833	0.598471	0.551668	0.411309	0.585514	0.0589717	0.0708402	0.0461801	0.745575	1.06135	0.702475	0.0577314	0.477555	0.023415
Q8BFQ4	0.489528	0.48059	0.612481	0.612874	0.780859	0.546707	0.474248	0.514763	0.616374	0.527533	0.646813	0.535128	0.0737031	0.120709	0.0732193	1.22611	1.0144	1.20871	0.217869	0.905343	0.242494
O09167	0.495436	0.45348	0.720851	1.00124	0.894094	0.754878	0.698528	0.824868	0.730441	0.556589	0.883406	0.751279	0.143794	0.12353	0.0656971	1.58718	1.34979	1.17587	0.0404957	0.0998668	0.177253
Q99L43	0.496445	0.572378	0.522072	0.656028	0.507399	0.519316	0.274559	0.291335	0.314472	0.530298	0.560915	0.293455	0.0386295	0.0825863	0.0200409	1.05773	0.553378	1.91141	0.592022	0.000706101	0.00550243
Q9D880	0.497737	0.578634	0.719218	0.529917	0.478203	0.322873	0.512877	0.543695	0.411549	0.59853	0.443664	0.489374	0.112073	0.107757	0.0691371	0.741257	0.817626	0.906596	0.159561	0.224411	0.569798
Q6P4T2	0.498594	0.499055	0.552504	0.819977	0.565222	0.737644	0.695421	0.685424	0.674128	0.516718	0.707614	0.684991	0.0309928	0.130005	0.0106532	1.36944	1.32566	1.03303	0.068653	0.000883379	0.778832
Q8VCM8	0.499172	0.540498	0.430644	0.576421	0.477257	0.530437	0.626674	0.613432	0.652967	0.490105	0.528038	0.631024	0.0554854	0.0496256	0.020123	1.0774	1.28753	0.836795	0.427293	0.0144301	0.0290777
P70697	0.500338	0.338974	0.495622	0.605215	0.530497	0.545829	0.579882	0.563579	0.392774	0.444978	0.560514	0.512078	0.0918324	0.0394639	0.103642	1.25964	1.15079	1.09459	0.115843	0.448535	0.49148
Q99KH8	0.501184	0.496831	0.542932	0.893218	0.791486	0.974027	0.674573	0.621322	0.708904	0.513649	0.886244	0.668266	0.0254528	0.0914699	0.0441306	1.72539	1.30102	1.32618	0.00244708	0.00626822	0.0205189
Q6PDG5	0.501747	0.464011	0.44508	0.576001	0.495506	0.592232	0.544619	0.481684	0.535677	0.47028	0.55458	0.52066	0.0288487	0.0517988	0.0340494	1.17926	1.10713	1.06515	0.0694926	0.122208	0.396908
Q9QZF2	0.50298	0.772107	0.909359	0.809384	0.765517	0.837496	1.06554	1.14762	0.9356	0.728148	0.804132	1.04959	0.206725	0.0362755	0.106905	1.10435	1.44144	0.766143	0.564638	0.0749867	0.0196745
P42227	0.504263	0.380272	0.517839	0.904638	0.744487	0.746953	0.641634	0.65813	0.666293	0.467458	0.798693	0.655352	0.0758097	0.0917593	0.0125616	1.70859	1.40195	1.21872	0.00852218	0.0133152	0.0551887
Q9CZW5	0.504295	0.450413	0.548427	0.468654	0.381713	0.438631	0.464938	0.515017	0.472682	0.501045	0.429666	0.484212	0.049088	0.0441583	0.0269575	0.85754	0.966404	0.887351	0.134451	0.63013	0.141866
Q9D7B6	0.504711	0.835554	0.744925	0.428928	0.402497	0.466343	0.538036	0.507362	0.417314	0.695063	0.432589	0.487571	0.170965	0.0320801	0.0627472	0.622374	0.701477	0.887234	0.0592005	0.119702	0.247965
P50431	0.505002	0.593809	0.678934	0.862235	0.601072	0.701288	0.754621	0.609824	0.599476	0.592582	0.721532	0.65464	0.0869724	0.131753	0.0867403	1.21761	1.10473	1.10218	0.230051	0.430932	0.503386
P61202	0.505375	0.512635	0.524723	0.349522	0.425205	0.470183	0.49853	0.480757	0.467678	0.514244	0.41497	0.482322	0.00977363	0.0609781	0.0154856	0.806952	0.937923	0.86036	0.0496006	0.0391856	0.137315
P57716	0.505608	0.551088	0.765886	1.0385	0.94772	1.26969	0.967474	1.03177	0.992263	0.607527	1.0853	0.997169	0.139015	0.16601	0.032428	1.78643	1.64136	1.08838	0.0187488	0.00911888	0.417829
Q8VED9	0.50657	0.485406	0.512633	0.36292	0.421983	0.514318	0.736586	0.442854	0.538844	0.501536	0.433074	0.572762	0.0142942	0.0763054	0.149775	0.863494	1.14201	0.756115	0.201362	0.458292	0.223454
Q9ES74	0.507096	0.721872	0.579492	0.451382	0.483807	0.449714	0.395763	0.516597	0.373973	0.60282	0.461635	0.428778	0.109272	0.0192201	0.0768302	0.765792	0.711287	1.07663	0.0922322	0.0869948	0.512143
F8VPU6	0.508377	0.611936	0.507239	0.50551	0.468706	0.417734	0.431305	0.452273	0.328105	0.542517	0.463983	0.403895	0.0601208	0.0440777	0.0664679	0.855242	0.744482	1.14877	0.142105	0.0552869	0.261913
Q9Z1F9	0.508674	0.534055	0.704461	0.683606	0.528957	0.697157	0.608473	0.506304	0.495964	0.582397	0.636573	0.536914	0.10647	0.0934439	0.0621878	1.09302	0.921904	1.18562	0.54393	0.557628	0.19891
Q9DBC7	0.512288	0.555281	0.661909	0.535173	0.651871	0.411141	0.537649	0.667348	0.463207	0.576493	0.532728	0.556068	0.0770331	0.120383	0.10331	0.924085	0.964571	0.958028	0.623926	0.79728	0.811418
P39447	0.512818	0.504287	0.525619	0.590939	0.730658	0.564997	0.377669	0.349144	0.33889	0.514241	0.628865	0.355234	0.010737	0.0891046	0.0200943	1.2229	0.690792	1.77028	0.0914131	0.000268611	0.00656719
Q99JH8	0.513551	0.693774	0.679942	0.556224	0.52169	0.44469	0.849164	0.785334	0.587491	0.629089	0.507535	0.740663	0.100298	0.0570985	0.136436	0.806777	1.17736	0.685244	0.142176	0.317455	0.0524366
P51432	0.514166	0.531061	0.632403	0.466011	0.489685	0.47116	0.505843	0.443679	0.603983	0.55921	0.475618	0.517835	0.0639472	0.012451	0.080822	0.850518	0.926012	0.918475	0.0903708	0.525115	0.421768
Q9ERU9	0.514473	0.436363	0.532191	0.657932	0.615266	0.553334	0.508309	0.581729	0.499087	0.494342	0.608844	0.529708	0.0509871	0.0525943	0.0452868	1.23162	1.07154	1.14939	0.053681	0.419837	0.119499
Q9D832	0.514765	0.724804	0.454705	0.490031	0.644158	0.489786	0.612115	0.854491	0.570382	0.564758	0.541325	0.678996	0.14182	0.089056	0.153409	0.958507	1.20228	0.797243	0.820414	0.397219	0.250035
P54822	0.51566	0.764746	0.633989	0.416864	0.494655	0.379689	0.527128	0.604978	0.46423	0.638132	0.430403	0.532112	0.124594	0.058667	0.0705061	0.674473	0.833859	0.808857	0.0592572	0.268882	0.127176
Q9JLV5	0.51688	0.511218	0.464987	0.6385	0.670879	0.622381	0.546242	0.518953	0.540101	0.497695	0.64392	0.535098	0.0284671	0.0246989	0.0143158	1.2938	1.07515	1.20337	0.00255338	0.111813	0.00272695
Q8VHE0	0.518357	0.495646	0.488448	0.694713	0.567968	0.559758	0.76096	0.766547	0.683793	0.500817	0.60748	0.7371	0.0156109	0.0756575	0.0462495	1.21298	1.47179	0.824149	0.0750467	0.00110718	0.0645382
Q62165	0.519583	0.641731	0.749317	0.332516	0.42277	0.372934	0.568728	0.676902	0.493603	0.636877	0.376074	0.579744	0.114944	0.0452089	0.0921447	0.590496	0.910292	0.648689	0.0216326	0.538562	0.0263655
Q8BKG3	0.519613	0.564734	0.637256	0.525772	0.449767	0.486544	1.15253	0.618236	0.935689	0.573868	0.487361	0.902152	0.0593507	0.0380088	0.268722	0.849257	1.57206	0.540221	0.100664	0.107697	0.0571493
Q921T2	0.519724	0.746095	0.701398	1.10906	0.876056	0.937371	0.780742	0.935358	0.774153	0.655739	0.974163	0.830084	0.119894	0.120782	0.0912296	1.4856	1.26588	1.17357	0.0316513	0.115535	0.174557
Q99LJ1	0.520904	0.651624	0.771712	0.900438	0.638376	0.908906	0.904341	0.87414	0.795137	0.64808	0.815907	0.857873	0.125442	0.153804	0.0563897	1.25896	1.32371	0.951082	0.216885	0.0574564	0.680196
Q9EPU0	0.521924	0.699799	0.717084	0.718921	0.722092	0.676532	0.928682	0.722307	0.89991	0.646269	0.705849	0.850299	0.108032	0.0254383	0.111775	1.09219	1.3157	0.830118	0.405111	0.0854114	0.0944709
P56812	0.522824	0.701188	0.804324	0.437117	0.614628	0.569137	0.530526	0.696266	0.768561	0.676112	0.540294	0.665118	0.142415	0.0922033	0.122036	0.79912	0.983739	0.812329	0.237845	0.924015	0.230389
P55302	0.522969	0.480171	0.530329	0.466822	0.508893	0.584295	0.609631	0.723966	0.70481	0.511156	0.520003	0.679469	0.0270852	0.0595195	0.0612349	1.01731	1.32928	0.765308	0.826235	0.01212	0.0318419
Q9CY58	0.523405	0.636559	0.584912	0.869166	0.673868	0.806214	1.11552	0.736167	1.25329	0.581625	0.783083	1.03499	0.0566488	0.0996824	0.267803	1.34637	1.77949	0.756606	0.0382763	0.0455262	0.201489
Q9WVP1	0.524808	0.609269	0.407028	0.3776	0.324931	0.431383	0.557054	0.454055	0.577987	0.513702	0.377972	0.529699	0.101577	0.0532269	0.06634	0.73578	1.03114	0.71356	0.109689	0.830549	0.0365811
Q61239	0.526899	0.602105	0.515146	0.448604	0.537705	0.400242	0.507812	0.408634	0.499969	0.54805	0.462183	0.472138	0.0471805	0.0697305	0.0551362	0.843323	0.861488	0.978915	0.15206	0.144232	0.855655
Q8K3C3	0.527049	0.562336	0.551266	0.425802	0.367885	0.418201	0.544952	0.541911	0.497189	0.546884	0.403963	0.528017	0.0180472	0.0314742	0.0267414	0.738663	0.965502	0.765055	0.00241259	0.368406	0.00650458
P26516	0.528194	0.540137	0.618193	0.817961	0.696992	0.884165	1.04866	0.736313	0.952087	0.562175	0.799706	0.912354	0.0488795	0.0949126	0.15992	1.42252	1.6229	0.876531	0.0182454	0.022218	0.3533
P49443	0.529266	0.598333	0.553018	0.394465	0.337822	0.47326	0.44752	0.425025	0.457116	0.560206	0.401849	0.44322	0.0350901	0.0680204	0.016472	0.717324	0.791174	0.906658	0.0230936	0.00639617	0.363777
Q99LB2	0.530349	0.668142	0.603366	0.588367	0.527897	0.545615	0.630529	0.625302	0.547795	0.600619	0.553959	0.601209	0.0689378	0.0310869	0.0463316	0.922314	1.00098	0.921409	0.345416	0.990777	0.216328
Q8BU33	0.53095	0.407108	0.558428	0.44227	0.333072	0.481616	0.415759	0.497369	0.685344	0.498829	0.418986	0.532824	0.0806121	0.076961	0.138246	0.83994	1.06815	0.78635	0.282471	0.731566	0.280705
Q9CQW1	0.530967	0.540453	0.54216	0.588453	0.52165	0.507346	0.74241	0.575056	0.733994	0.53786	0.53915	0.68382	0.00603023	0.0432929	0.0942864	1.0024	1.27137	0.788438	0.961685	0.0554683	0.0731439
Q8VDM6	0.531406	0.51992	0.593893	0.687557	0.644495	0.659814	0.45428	0.545508	0.445956	0.548406	0.663955	0.481914	0.0398092	0.0218276	0.0552304	1.2107	0.878755	1.37774	0.0116165	0.165983	0.00604911
P28660	0.531665	0.544086	0.562446	0.406794	0.495901	0.412537	0.51513	0.494209	0.466358	0.546066	0.438411	0.491899	0.0154856	0.0498708	0.0244679	0.802853	0.900805	0.891262	0.0233599	0.0316736	0.170687
Q8K297	0.53298	0.376356	0.400445	0.415517	0.446349	0.457815	0.840836	0.727061	0.713769	0.436594	0.439894	0.760555	0.0843374	0.0218756	0.069842	1.00756	1.74202	0.578385	0.950842	0.00686577	0.00161734
P53811	0.533451	0.52133	0.668572	0.631358	0.69364	0.604515	0.770274	0.50753	0.589184	0.574451	0.643171	0.622329	0.0817361	0.0457218	0.134472	1.11963	1.08335	1.03349	0.272647	0.626081	0.811903
P58281	0.53463	0.556485	0.587016	0.388098	0.418275	0.272624	0.406808	0.404894	0.303048	0.559377	0.359666	0.371584	0.0263122	0.0768756	0.0593608	0.642976	0.664281	0.967927	0.0130833	0.00744067	0.842086
Q8BXZ1	0.534956	0.298124	0.450352	0.438022	0.334114	0.346909	0.427404	0.419497	0.285609	0.427811	0.373015	0.377503	0.120014	0.05666	0.079681	0.871917	0.882407	0.988112	0.514056	0.577905	0.94045
Q9WVJ2	0.535534	0.578938	0.623057	0.659219	0.709758	0.737283	0.874138	0.776324	0.856229	0.579176	0.702087	0.835564	0.0437618	0.0395933	0.052079	1.21222	1.44268	0.840255	0.0226095	0.00284397	0.024146
Q61249	0.53579	0.475714	0.384231	0.491594	0.57571	0.50926	0.522029	0.459164	0.372685	0.465245	0.525521	0.451292	0.0763203	0.0443534	0.0749825	1.12956	0.97001	1.16448	0.302415	0.832372	0.214037
Q61074	0.536522	0.359079	0.556884	0.490927	0.497985	0.496701	0.547766	0.50934	0.513286	0.484162	0.495205	0.523464	0.108802	0.00375945	0.0211383	1.02281	1.08118	0.946014	0.869072	0.572306	0.0848058
Q6P9Q6	0.537161	0.39394	0.420634	0.387721	0.34714	0.483903	0.454551	0.538421	0.439521	0.450578	0.406255	0.477498	0.0761612	0.0702399	0.0532936	0.90163	1.05974	0.850799	0.499842	0.642302	0.234228
Q9CYR6	0.538095	0.566504	0.48068	0.295893	0.315023	0.33532	0.432561	0.30387	0.364937	0.528427	0.315412	0.367123	0.0437213	0.0197165	0.0643729	0.596889	0.694747	0.859145	0.00153614	0.0229553	0.25418
Q9QZE5	0.538415	0.436687	0.41106	0.412989	0.427567	0.447479	0.64336	0.549363	0.599629	0.462054	0.429345	0.597451	0.0673605	0.0173138	0.047036	0.929209	1.29303	0.718628	0.461031	0.0461877	0.00436922
O70252	0.539341	0.518154	0.478273	0.754061	0.696812	0.641212	0.457569	0.529842	0.527651	0.511922	0.697362	0.50502	0.0310075	0.0564268	0.0411089	1.36224	0.986517	1.38086	0.00755127	0.827803	0.0088276
P46061	0.539538	0.500482	0.537444	0.681088	0.751917	0.680587	0.777318	0.631666	0.723485	0.525821	0.704531	0.710823	0.0219696	0.0410387	0.0736469	1.33987	1.35183	0.991148	0.00265565	0.0140384	0.903388
Q8BFZ3	0.544257	0.935673	0.832636	0.867043	0.887257	0.581877	0.62077	0.533921	0.365925	0.770855	0.778725	0.506872	0.20289	0.170775	0.129558	1.01021	0.657545	1.53634	0.96147	0.130332	0.0930024
Q9CZ04	0.545427	0.540206	0.45715	0.415456	0.610752	0.409952	0.411918	0.523407	0.483295	0.514261	0.47872	0.472873	0.0495285	0.114376	0.0564703	0.930888	0.91952	1.01236	0.647268	0.39394	0.94054
Q8C7R4	0.545428	0.454896	0.52154	0.641829	0.467758	0.474141	0.572122	0.358444	0.550144	0.507288	0.527909	0.49357	0.0469188	0.098709	0.117538	1.04065	0.972958	1.06957	0.760206	0.860214	0.718119
Q8VHM5	0.546032	0.617609	0.482797	0.509047	0.519869	0.566317	0.688798	0.520877	0.499723	0.548813	0.531744	0.569799	0.0674492	0.0304257	0.103598	0.9689	1.03824	0.933213	0.709917	0.783348	0.57454
P61222	0.547813	0.641729	0.411244	0.727752	0.755915	0.660604	1.0954	0.984252	0.899748	0.533595	0.714757	0.993132	0.115898	0.0489664	0.0981263	1.33951	1.86121	0.7197	0.0672009	0.00633459	0.0117217
Q9CSU0	0.548178	0.448119	0.404355	0.622957	0.495986	0.552723	0.419205	0.405698	0.425202	0.466884	0.557222	0.416702	0.073725	0.0636046	0.00999018	1.19349	0.892516	1.33722	0.18334	0.307575	0.0194319
Q148V8	0.548709	0.514484	0.617541	0.49358	0.431068	0.451507	0.678231	0.448699	0.638406	0.560245	0.458718	0.588445	0.0524878	0.031874	0.122651	0.818781	1.05034	0.779543	0.0457614	0.732817	0.150897
Q80UM7	0.549184	0.53962	0.590022	0.767593	0.578391	0.683724	0.691223	0.615296	0.675477	0.559609	0.676569	0.660665	0.026769	0.0948036	0.0400722	1.209	1.18058	1.02407	0.10889	0.0221183	0.802213
Q64435	0.549268	0.467417	0.403485	0.435283	0.331308	0.492466	0.844241	0.942964	0.730739	0.47339	0.419686	0.839315	0.0730746	0.0817033	0.106198	0.886554	1.77299	0.500034	0.443905	0.00794881	0.00560063
Q91W89	0.554378	0.486766	0.676868	0.577653	0.431273	0.55276	0.588864	0.542578	0.56279	0.572671	0.520562	0.564744	0.0963623	0.0783216	0.0232046	0.909007	0.986158	0.921766	0.507587	0.896526	0.40189
Q99PV0	0.55549	0.482279	0.599756	0.897309	0.611669	0.883349	0.781077	0.741766	0.7549	0.545842	0.797443	0.759248	0.0593301	0.161036	0.0200126	1.46094	1.39097	1.05031	0.0640299	0.0041205	0.704388
P60229	0.556216	0.534701	0.530556	0.73949	0.715247	0.645239	0.883586	0.728027	0.911488	0.540491	0.699992	0.841034	0.0137752	0.048942	0.0988559	1.2951	1.55606	0.832299	0.00556664	0.00644769	0.0911541
O35857	0.558706	0.513371	0.498118	0.45224	0.432691	0.413362	0.540985	0.583339	0.483989	0.523398	0.432764	0.536104	0.0315143	0.0194391	0.0498549	0.826836	1.02428	0.807239	0.0132675	0.727981	0.0287035
O55234	0.558723	0.878605	0.899647	0.775868	0.697972	0.87308	1.32559	1.01393	1.18124	0.778992	0.782307	1.17359	0.191049	0.0877312	0.155971	1.00426	1.50655	0.666595	0.979519	0.0502699	0.0193163
Q9JLN9	0.559027	0.586904	0.655936	0.57807	0.466351	0.489001	0.483206	0.642077	0.455891	0.600622	0.511141	0.527058	0.0498897	0.0590587	0.100541	0.851019	0.87752	0.9698	0.115492	0.319687	0.824709
Q8BHG1	0.559932	0.460072	0.537263	0.933078	0.813256	0.874382	1.03949	0.71388	0.979365	0.519089	0.873572	0.910912	0.0523518	0.0599151	0.173263	1.68289	1.75483	0.959009	0.00151805	0.0199557	0.742062
A0A0J9YUD5	0.560554	0.536084	0.478254	0.619387	0.683624	0.508793	0.546205	0.527137	0.465548	0.524964	0.603935	0.512964	0.0422617	0.0884337	0.0421554	1.15043	0.977141	1.17734	0.235337	0.745239	0.183038
P06797	0.561522	0.728864	0.709996	1.25667	1.03461	1.27918	1.02562	0.758981	1.02699	0.666794	1.19015	0.937196	0.0916553	0.135171	0.15434	1.78489	1.40553	1.26991	0.00515499	0.0594739	0.0995844
Q61699	0.561726	0.556543	0.548972	0.314192	0.351807	0.284025	0.606274	0.452416	0.465565	0.555747	0.316675	0.508085	0.00641413	0.0339592	0.0852878	0.569818	0.914238	0.623271	0.000278077	0.389099	0.0225272
P68254	0.562487	0.775284	0.503157	0.616484	0.4859	0.591676	0.658686	0.51806	0.567268	0.613643	0.564687	0.581338	0.143094	0.0693494	0.0713613	0.92022	0.947355	0.971357	0.622109	0.74404	0.786347
Q3UJB0	0.563299	0.585357	0.533058	0.786494	0.718672	0.773982	0.578638	0.504795	0.678861	0.560571	0.759716	0.587431	0.0262561	0.0360918	0.0873653	1.35525	1.04792	1.29328	0.00150949	0.636919	0.0342879
Q9CPX6	0.563471	0.462519	0.693846	0.746284	0.590195	0.626227	0.571487	0.507495	0.637943	0.573278	0.654235	0.572308	0.115975	0.0817267	0.065228	1.14122	0.998308	1.14315	0.378944	0.990528	0.246288
O35841	0.565556	0.533401	0.634113	0.820793	0.689264	0.83301	0.696446	0.739002	0.650685	0.57769	0.781022	0.695378	0.0514408	0.0796993	0.0441684	1.35198	1.20372	1.12316	0.0206051	0.0396887	0.17886
Q9DC61	0.566108	0.711069	0.644622	0.518717	0.534943	0.479927	0.642138	0.663762	0.401669	0.640599	0.511196	0.56919	0.0725643	0.0282683	0.14548	0.797996	0.888527	0.898111	0.0450999	0.489156	0.535087
Q9JIK5	0.5683	0.497957	0.604429	1.07413	1.17557	1.06251	1.08257	1.10924	1.00445	0.556895	1.10407	1.06542	0.0541445	0.062193	0.0544594	1.98255	1.91314	1.03628	0.000327163	0.000329834	0.463471
Q61035	0.568896	0.702983	0.757498	1.01058	1.03398	1.00951	1.48479	1.02607	1.39241	0.676459	1.01802	1.30109	0.0970585	0.0138282	0.242611	1.50493	1.92339	0.782436	0.00380201	0.0143723	0.113804
Q921I9	0.57094	0.378485	0.571826	0.600449	0.699213	0.479276	0.317229	0.447682	0.342201	0.507084	0.592979	0.369038	0.111371	0.110158	0.0692435	1.16939	0.727764	1.60683	0.396021	0.14234	0.0406953
Q9D0I9	0.571428	0.585038	0.487171	0.757822	0.71071	0.734949	1.04858	0.718841	0.949356	0.547879	0.734494	0.905591	0.0530129	0.0235592	0.169168	1.34061	1.6529	0.811065	0.00508453	0.0250115	0.157746
P30416	0.571716	0.427479	0.487081	0.262311	0.281448	0.26421	0.362532	0.210363	0.385809	0.495425	0.269323	0.319568	0.0724794	0.0105435	0.095288	0.54362	0.645037	0.842773	0.0058978	0.0636959	0.415349
O35609	0.572688	0.695496	0.756931	0.587085	0.415177	0.550092	0.760702	1.03938	0.762924	0.675039	0.517451	0.854335	0.0938097	0.0904831	0.160257	0.766551	1.26561	0.605677	0.104335	0.169769	0.0338397
Q99L04	0.57598	0.61815	0.701766	1.03842	0.811578	1.01208	1.24749	1.00845	1.2818	0.631965	0.954026	1.17925	0.0640212	0.124064	0.148903	1.50962	1.866	0.809013	0.0161887	0.00426362	0.114444
Q61823	0.57605	0.471202	0.524282	0.420722	0.351464	0.488203	0.763209	0.542487	0.657618	0.523845	0.42013	0.654438	0.0524255	0.0683713	0.110395	0.802012	1.2493	0.64197	0.105423	0.137854	0.0353441
O35286	0.576151	0.47028	0.568829	0.934028	0.832063	0.88823	0.746146	0.698929	0.72301	0.53842	0.884774	0.722695	0.0591247	0.0510705	0.0236099	1.64328	1.34225	1.22427	0.00154693	0.00741993	0.00754636
Q8BL66	0.577193	0.524503	0.594825	0.382252	0.457888	0.446485	0.40807	0.419735	0.344011	0.565507	0.428875	0.390605	0.0365886	0.0407776	0.0407711	0.75839	0.690717	1.09798	0.0124516	0.00522469	0.314401
G5E8V9	0.577277	0.496349	0.606979	0.313735	0.554305	0.460912	0.653998	0.529144	0.605114	0.560202	0.442984	0.596085	0.0572577	0.121283	0.0629145	0.790758	1.06405	0.743156	0.204641	0.505509	0.124256
O08967	0.579367	0.853989	0.901194	1.11203	0.732861	0.916721	0.791054	0.648359	0.831116	0.778183	0.920537	0.756843	0.17379	0.189612	0.0960613	1.18293	0.972577	1.21628	0.392038	0.861394	0.253125
Q8CGA0	0.581304	0.497739	0.60354	0.607164	0.477614	0.646978	0.437837	0.470134	0.482111	0.560861	0.577252	0.463361	0.0557847	0.0885557	0.0229007	1.02923	0.82616	1.24579	0.799615	0.0487878	0.0972541
Q8K183	0.583875	0.700769	0.699904	0.36717	0.498345	0.477028	0.549927	0.437365	0.36233	0.661516	0.447514	0.449874	0.0672407	0.0703918	0.0944219	0.676498	0.680065	0.994755	0.0189782	0.0341059	0.973981
Q6P8X1	0.584668	0.834852	0.746977	0.940149	0.834344	0.941883	1.13299	1.30211	1.02964	0.722165	0.905459	1.15491	0.126924	0.0615934	0.137552	1.25381	1.59924	0.784006	0.0876151	0.0160668	0.045614
Q64511	0.58498	0.515729	0.60678	0.783651	0.689581	0.733187	0.832115	0.729488	0.779414	0.569163	0.735473	0.780339	0.0475417	0.0470769	0.0513196	1.2922	1.37103	0.942504	0.0125918	0.00639022	0.326991
P46935	0.585877	0.52476	0.525964	0.457709	0.5111	0.440178	0.706989	0.618794	0.644243	0.545534	0.469662	0.656675	0.0349435	0.0369413	0.0453929	0.860923	1.20373	0.715212	0.0610479	0.028293	0.00520863
Q9DAW9	0.587366	0.573001	0.577726	0.779592	0.454521	0.70718	0.730416	0.668414	0.577213	0.579364	0.647098	0.658681	0.00732164	0.170661	0.0770636	1.11691	1.1369	0.982414	0.529956	0.150613	0.919835
Q8BFY9	0.588296	0.598921	0.532112	0.888388	0.679975	0.821676	0.94975	0.745145	0.841754	0.573109	0.79668	0.84555	0.0359004	0.106432	0.102355	1.3901	1.47537	0.942203	0.0261139	0.0121534	0.597173
O70194	0.58888	0.652652	0.64844	0.922287	0.764348	0.908697	1.06083	0.793535	0.953398	0.629991	0.865111	0.935921	0.0356651	0.0875271	0.134502	1.37321	1.48561	0.924341	0.0125584	0.0189725	0.487294
P35550	0.589925	0.562855	0.737403	0.959927	0.810436	0.851305	0.676351	0.952579	0.818932	0.630061	0.873889	0.815954	0.0939408	0.0772621	0.138138	1.38699	1.29504	1.071	0.0255338	0.126196	0.560529
P67871	0.590092	0.485642	0.350434	0.616949	0.33722	0.574819	0.713423	0.538789	0.580405	0.47539	0.509663	0.610872	0.120157	0.150818	0.0912163	1.07209	1.28499	0.83432	0.773561	0.194802	0.376239
Q8QZY1	0.591466	0.564881	0.602413	0.914871	0.804873	0.782404	0.994526	0.841553	0.97399	0.586254	0.83405	0.93669	0.0193013	0.0708893	0.0830282	1.42268	1.59776	0.890422	0.00428114	0.00205608	0.178773
O35295	0.593015	0.883183	0.86794	0.794442	0.662395	0.811432	0.572863	0.731382	0.596914	0.781379	0.75609	0.63372	0.163307	0.0815856	0.0854283	0.967635	0.811027	1.1931	0.822165	0.237531	0.14722
P63280	0.597463	0.711033	0.641085	1.35411	1.19182	1.33443	1.08937	1.25855	1.43115	0.64986	1.29345	1.25969	0.0572913	0.0885702	0.170895	1.99036	1.9384	1.02681	0.000453654	0.00423235	0.776393
O08579	0.599461	0.589335	0.713602	0.526749	0.645819	0.447184	0.471422	0.517681	0.416677	0.634133	0.539918	0.468593	0.0690083	0.0999703	0.0505611	0.851427	0.738952	1.15221	0.250306	0.0285272	0.332029
Q8BVE3	0.600125	0.492142	0.448684	0.758819	0.85206	0.683022	0.755008	0.724557	0.770869	0.51365	0.764634	0.750145	0.0779778	0.0846692	0.0235356	1.48863	1.46042	1.01931	0.019492	0.00733881	0.789388
Q8VDP4	0.60055	0.466182	0.641049	0.746323	0.588018	0.627565	0.536492	0.488894	0.470047	0.56926	0.653969	0.498478	0.0915362	0.082389	0.0342435	1.1488	0.875659	1.31193	0.299372	0.277984	0.0392204
Q9JKY5	0.600759	0.455972	0.592088	0.892243	0.6999	0.99384	0.741617	0.480723	0.747719	0.549606	0.861994	0.656686	0.0812056	0.149286	0.152419	1.56838	1.19483	1.31264	0.0334125	0.343326	0.170889
P61327	0.601003	0.435445	0.476498	0.753907	0.717223	0.723698	0.586498	0.488463	0.489448	0.504315	0.731609	0.52147	0.0862131	0.0195799	0.0563181	1.4507	1.03402	1.40298	0.0112206	0.787276	0.00364436
O70325	0.602737	0.84672	0.675252	0.878521	0.761224	0.82758	0.654155	0.64113	0.66711	0.708236	0.822442	0.654132	0.125291	0.0588173	0.01299	1.16125	0.923607	1.2573	0.226169	0.498227	0.00840159
Q99J99	0.603377	1.00402	0.784124	0.473272	0.522748	0.361016	0.625246	0.403868	0.5024	0.797174	0.452345	0.510504	0.20064	0.082872	0.110911	0.567436	0.640393	0.886075	0.0513045	0.0962588	0.507175
Q8BK67	0.603832	0.582142	0.586225	0.937694	0.797923	0.918762	0.880242	0.71736	0.886686	0.590733	0.884793	0.828096	0.0115264	0.0758251	0.0959541	1.49779	1.40181	1.06847	0.00266873	0.013116	0.466989
P23506	0.605968	0.783965	0.784865	0.536699	0.648614	0.568994	0.431427	0.571673	0.440612	0.724933	0.584769	0.481237	0.103028	0.0576009	0.0784543	0.806653	0.663837	1.21514	0.108853	0.031097	0.139206
Q8BFY6	0.60685	0.353629	0.652257	0.844901	0.561623	0.662961	0.676462	0.557775	0.831235	0.537579	0.689828	0.688491	0.160915	0.143537	0.137126	1.28321	1.28073	1.00194	0.288474	0.283961	0.991246
Q9EPB4	0.608099	0.639413	0.663433	0.76591	0.80146	0.993564	0.782934	0.772076	0.983181	0.636982	0.853645	0.846064	0.0277468	0.122471	0.118871	1.34014	1.32824	1.00896	0.0404003	0.0412774	0.942369
Q61768	0.608527	0.548715	0.613276	0.573771	0.532822	0.554622	0.677575	0.586246	0.666509	0.590172	0.553738	0.643443	0.035982	0.0204886	0.0498423	0.938265	1.09026	0.860586	0.202172	0.207768	0.0448681
Q9JL35	0.608595	0.497962	0.369227	0.496134	0.34052	0.535144	0.486183	0.363509	0.471136	0.491928	0.457266	0.440276	0.119798	0.102969	0.0669063	0.929539	0.895001	1.03859	0.723228	0.549972	0.822384
P11031	0.609237	0.512812	0.400291	1.02286	1.05347	0.94954	0.529222	0.673633	0.587553	0.507447	1.00862	0.596803	0.104577	0.0534069	0.0726485	1.98765	1.17609	1.69005	0.00178556	0.291022	0.00138153
Q91WK2	0.609788	0.495187	0.590467	0.916492	0.756715	0.914982	1.19093	0.776792	1.10394	0.565147	0.86273	1.02389	0.061353	0.0918144	0.218366	1.52656	1.81172	0.842602	0.00953539	0.0248279	0.303966
O08810	0.610209	0.572064	0.650567	0.950531	0.743999	0.791466	0.774902	0.707163	0.728923	0.610947	0.828665	0.736996	0.0392569	0.108175	0.0345838	1.35636	1.20632	1.12438	0.0305893	0.0139967	0.234638
Q8R242	0.611062	0.523798	0.621691	1.00474	0.7466	1.01685	0.617267	0.919274	0.649122	0.585517	0.922728	0.728554	0.0537141	0.152652	0.165934	1.57592	1.24429	1.26652	0.0225722	0.228501	0.210066
Q922J3	0.611349	0.467164	0.535667	0.285654	0.236509	0.375648	0.307378	0.266348	0.245802	0.53806	0.29927	0.273176	0.0721225	0.0705618	0.0313509	0.556202	0.507705	1.09552	0.0148638	0.00430211	0.589744
Q6P9J9	0.611733	0.509508	0.419717	0.46851	0.290934	0.442543	0.49293	0.715179	0.413442	0.513653	0.400662	0.540517	0.096075	0.0959103	0.156396	0.780025	1.0523	0.741257	0.222861	0.812376	0.257199
O35864	0.611944	0.432656	0.693247	0.495904	0.425839	0.498049	0.533771	0.503682	0.469825	0.579282	0.473264	0.502426	0.13333	0.0410851	0.0319919	0.816983	0.867325	0.941958	0.258471	0.386595	0.386973
Q9D554	0.612658	0.598807	0.646599	0.826811	0.757858	0.814261	0.79944	0.76782	0.810994	0.619354	0.799643	0.792752	0.0245897	0.0367273	0.0223509	1.29109	1.27996	1.00869	0.00211737	0.000830256	0.795049
P61924	0.612971	0.619237	0.75669	0.801014	0.801686	0.79057	0.978386	0.740833	1.05281	0.662966	0.797757	0.92401	0.081228	0.00623283	0.162942	1.20332	1.39375	0.863364	0.0456631	0.067964	0.250985
Q9WTQ8	0.613264	0.633593	0.685209	0.6383	0.692453	0.615263	0.701459	0.734263	0.575704	0.644022	0.648672	0.670475	0.0370891	0.0396269	0.0836971	1.00722	1.04108	0.96748	0.889213	0.643008	0.704297
Q8CG72	0.613873	0.466216	0.604348	0.299957	0.293191	0.334075	0.34075	0.366247	0.32279	0.561479	0.309074	0.343262	0.0826377	0.0219139	0.0218369	0.550465	0.611354	0.900403	0.00691706	0.0114935	0.128142
Q9D287	0.618202	0.822201	0.875052	0.709703	0.482911	0.521115	0.524075	0.622419	0.450891	0.771818	0.571243	0.532461	0.135635	0.121422	0.0860709	0.740126	0.689879	1.07283	0.128989	0.0612756	0.675144
O88487	0.619598	0.684418	0.686567	0.696463	0.536897	0.628245	1.0163	0.728425	0.754517	0.663528	0.620535	0.833079	0.0380593	0.080062	0.159206	0.935206	1.25553	0.744869	0.448176	0.147255	0.107739
Q9JMH6	0.621308	0.780417	0.734146	0.947712	0.757272	1.05283	1.0113	0.858477	0.888693	0.711957	0.919271	0.919491	0.0818423	0.149817	0.0809338	1.29119	1.2915	0.999761	0.103258	0.0354249	0.998321
O70475	0.623612	0.62127	0.46357	0.68495	0.823853	0.912124	0.941604	1.11662	1.089	0.569484	0.806976	1.04907	0.0917317	0.114524	0.0940903	1.41703	1.84215	0.769227	0.0486433	0.00320411	0.0473878
Q8R164	0.626567	0.848666	0.654125	0.458595	0.450013	0.410956	0.470123	0.438957	0.493623	0.709786	0.439854	0.467567	0.121061	0.0253922	0.0274224	0.6197	0.658744	0.94073	0.0194401	0.0277888	0.26836
P14685	0.629147	0.656962	0.666436	0.772563	0.834195	0.742112	0.944047	0.781537	0.843713	0.650848	0.782957	0.856433	0.0193818	0.0469134	0.081998	1.20298	1.31587	0.914207	0.0107573	0.0134117	0.249192
P80314	0.630338	0.684226	0.72156	1.0929	0.857451	1.10185	1.14524	1.03742	1.14584	0.678708	1.0174	1.1095	0.0458607	0.138592	0.0624274	1.49902	1.63472	0.91699	0.015884	0.000649562	0.353186
A0A0U1RNF2	0.630698	0.900991	0.835863	0.611628	0.348293	0.569626	0.415779	0.415456	0.410414	0.789184	0.509849	0.413883	0.141063	0.141479	0.00300839	0.646046	0.524444	1.23187	0.0726308	0.00997733	0.305309
Q8BWL5	0.632247	0.58491	0.469317	0.606555	0.840248	0.858877	0.604477	0.605217	0.857313	0.562158	0.76856	0.689002	0.083814	0.140609	0.145762	1.36716	1.22564	1.11547	0.0943281	0.261394	0.533601
P63276	0.632738	0.421851	0.52813	0.76266	0.79443	0.824197	0.823405	0.646574	0.651671	0.527573	0.793762	0.707217	0.105445	0.030774	0.100654	1.50455	1.34051	1.12237	0.0137249	0.0997028	0.227501
P59235	0.633466	0.428027	0.629449	0.380716	0.437486	0.38831	0.380523	0.454442	0.469759	0.563647	0.402171	0.434908	0.117468	0.0308186	0.0477171	0.713515	0.771596	0.924726	0.0826646	0.153452	0.374669
O35593	0.634503	0.679014	0.659164	0.744987	0.832533	0.863764	1.0861	0.84911	0.991592	0.65756	0.813761	0.975602	0.0222987	0.0615735	0.119303	1.23755	1.48367	0.834112	0.0144782	0.0105071	0.105076
Q8VDM4	0.636372	0.62943	0.689389	0.736925	0.800738	0.69382	0.835256	0.796448	0.808101	0.65173	0.743828	0.813268	0.0327977	0.0537923	0.0199131	1.14131	1.24786	0.914615	0.0645328	0.00188008	0.104022
P32020	0.636692	0.994922	0.800937	1.49589	1.61159	1.56083	1.11013	1.31439	1.35372	0.81085	1.5561	1.25941	0.179321	0.057995	0.130773	1.9191	1.5532	1.23558	0.00237844	0.0248813	0.0229176
Q9Z0M5	0.637059	0.603547	0.682566	0.536021	0.558663	0.579892	0.657873	0.877806	0.817167	0.641058	0.558192	0.784282	0.039661	0.0219396	0.113594	0.870736	1.22342	0.711724	0.0339669	0.108234	0.0276627
Q02248	0.637667	0.586436	0.738111	0.375483	0.525987	0.522326	0.713736	0.588978	0.543038	0.654071	0.474598	0.615251	0.0771563	0.0858559	0.0883297	0.725607	0.940648	0.77139	0.0544882	0.597129	0.119111
Q01405	0.637942	0.597727	0.609957	0.42928	0.4873	0.474134	0.784217	0.617298	0.701382	0.615209	0.463571	0.700966	0.0206154	0.030418	0.08346	0.753519	1.1394	0.661333	0.00202705	0.159093	0.00981596
Q80VD1	0.638479	0.859192	0.853619	0.868431	0.664999	0.966416	0.985917	0.775588	0.578974	0.783763	0.833282	0.78016	0.125851	0.153752	0.20351	1.06318	0.995402	1.06809	0.68823	0.98044	0.736538
P97873	0.638528	0.752281	0.785455	0.425732	0.337774	0.50746	0.69645	0.790021	0.722987	0.725422	0.423656	0.736486	0.0770584	0.0848623	0.0482239	0.584013	1.01525	0.575239	0.0103409	0.843337	0.00515272
Q8BWM0	0.639159	0.856425	1.1631	0.828333	0.652212	0.554777	0.692875	0.68729	0.55784	0.886229	0.67844	0.646001	0.263241	0.138651	0.0764012	0.765536	0.728933	1.05022	0.293012	0.203626	0.740575
Q3U7R1	0.639214	0.623066	0.706924	0.850469	0.795931	0.860034	0.806778	0.902186	0.797966	0.656401	0.835478	0.835643	0.0444926	0.0345806	0.0577957	1.27282	1.27307	0.999802	0.00531324	0.0130907	0.996815
P0DN34	0.640321	0.873057	0.688525	0.476653	0.54418	0.38817	0.556747	0.557256	0.588897	0.733967	0.469668	0.567633	0.122843	0.0782391	0.0184166	0.639903	0.773377	0.827414	0.0347411	0.0811945	0.102369
Q99JB8	0.642188	0.732349	0.681461	0.437168	0.575038	0.439362	0.527251	0.578027	0.559584	0.685332	0.483856	0.554954	0.045205	0.0789738	0.0257028	0.706016	0.809759	0.871885	0.0185393	0.0122277	0.212279
P21958	0.64423	0.64802	0.802579	0.840374	0.688498	0.601362	0.329194	0.432947	0.427686	0.698276	0.710078	0.396609	0.0903489	0.120958	0.0584421	1.0169	0.567983	1.79037	0.89884	0.00830422	0.0155826
Q9QUR6	0.64446	0.652086	0.696648	0.869379	0.854417	0.884007	1.33537	0.895015	1.21788	0.664398	0.869268	1.14942	0.0281882	0.0147954	0.228018	1.30835	1.73002	0.756267	0.000368704	0.021648	0.100932
P83940	0.644614	0.530334	0.760843	0.523337	0.60011	0.506832	0.502907	0.507416	0.543039	0.645264	0.543426	0.517788	0.115256	0.0497783	0.0219845	0.842177	0.802443	1.04952	0.23273	0.133009	0.460276
Q3TZZ7	0.645165	0.591905	0.79151	0.658211	0.612427	0.596222	0.635711	0.65136	0.565595	0.676193	0.622287	0.617555	0.103357	0.0321492	0.0456744	0.92028	0.913282	1.00766	0.437008	0.419571	0.890441
O35250	0.646377	0.732034	0.563081	0.676338	0.756102	0.914471	0.545894	0.651824	0.705703	0.647164	0.782304	0.634473	0.0844794	0.12121	0.081305	1.20882	0.98039	1.233	0.188306	0.860413	0.154234
Q9R190	0.647243	0.528283	0.591756	0.913445	0.768584	0.825843	0.675639	0.593998	0.642992	0.589094	0.835957	0.637543	0.0595243	0.0729585	0.0410924	1.41906	1.08224	1.31122	0.0104892	0.310504	0.0148023
Q8BRF7	0.64751	0.664523	0.707917	0.776185	0.656922	0.740616	0.95041	0.824534	0.867325	0.673317	0.724574	0.880756	0.0311489	0.0612281	0.0640038	1.07613	1.30809	0.822673	0.265833	0.00724311	0.0378757
Q3TBT3	0.648375	0.397022	0.463877	0.678561	0.624586	0.514474	0.588516	0.652003	0.63614	0.503091	0.605874	0.625553	0.130184	0.0836285	0.0330413	1.2043	1.24342	0.968541	0.314022	0.189428	0.723902
Q9WTK3	0.648924	0.443807	0.51582	0.620197	0.616287	0.540449	0.666996	0.524282	0.50489	0.536184	0.592311	0.565389	0.104063	0.0449565	0.0885268	1.10468	1.05447	1.04762	0.439464	0.729964	0.66307
Q3SXD3	0.649776	0.485367	0.486281	0.436715	0.459887	0.481989	0.550607	0.451626	0.448371	0.540475	0.45953	0.483535	0.0946591	0.0226394	0.0581091	0.850235	0.894649	0.950356	0.223162	0.424755	0.541454
P58321	0.652309	0.594085	0.741448	0.505235	0.658062	0.609643	0.67909	0.585728	0.693669	0.662614	0.59098	0.652829	0.0742202	0.0781041	0.0585668	0.891892	0.985233	0.90526	0.313652	0.866448	0.334117
Q91W50	0.652786	0.627304	0.700749	1.00721	0.924855	0.942403	1.15153	1.01084	0.991392	0.66028	0.958156	1.05125	0.0372916	0.0433786	0.0873812	1.45114	1.59213	0.911441	0.00083697	0.00204822	0.173693
P22315	0.652919	0.597993	0.690219	0.401569	0.353503	0.410515	0.465751	0.568449	0.447256	0.647044	0.388529	0.493819	0.0463927	0.0306612	0.0652903	0.600468	0.763192	0.786785	0.00129172	0.0295572	0.0647844
O08997	0.654195	0.662604	0.466231	0.31466	0.449276	0.546402	0.386037	0.442565	0.667264	0.594343	0.436779	0.498622	0.111028	0.116376	0.148758	0.734894	0.838946	0.875973	0.164985	0.422245	0.600939
Q60902	0.657194	0.566369	0.516008	0.577965	0.594848	0.509466	0.466975	0.453452	0.353562	0.579857	0.56076	0.424663	0.0715527	0.0452166	0.0619452	0.967066	0.732358	1.32048	0.715879	0.0468566	0.0371602
O88958	0.65729	0.519769	0.590521	0.579106	0.627498	0.749123	0.718245	0.889727	0.879294	0.589193	0.651909	0.829089	0.06877	0.0875981	0.096135	1.10644	1.40716	0.786296	0.384597	0.0245535	0.0776985
P39061	0.658375	0.771868	0.702592	0.699311	0.603952	0.708273	0.978524	0.95581	0.912824	0.710945	0.670512	0.949053	0.0572054	0.0578162	0.033367	0.943128	1.33492	0.706507	0.437768	0.00338624	0.00194432
Q8R2Y2	0.658811	0.515524	0.666604	0.569159	0.724832	0.570923	0.790799	0.717087	0.629426	0.613646	0.621638	0.712437	0.0850657	0.0893731	0.0807869	1.01302	1.16099	0.872552	0.916076	0.21844	0.261777
P06683	0.659252	0.483079	0.366855	0.775548	0.584358	0.634249	0.673544	0.631421	1.04622	0.503062	0.664718	0.783728	0.14722	0.0991705	0.228297	1.32134	1.55791	0.848149	0.18984	0.148029	0.454137
Q91VR5	0.659467	0.619592	0.635236	0.553359	0.590346	0.638454	0.801183	0.749949	0.804011	0.638098	0.594053	0.785048	0.0200913	0.0426687	0.0304294	0.930974	1.23029	0.756709	0.18106	0.00221553	0.0032212
Q8BGQ7	0.660001	0.624983	0.630004	0.75501	0.863696	0.758949	1.07188	0.925061	0.970013	0.638329	0.792552	0.988984	0.0189353	0.0616442	0.0752255	1.2416	1.54933	0.801379	0.0143501	0.00143679	0.024935
Q99L45	0.661661	0.621676	0.463095	0.598869	0.437327	0.535779	0.62685	0.499298	0.559797	0.582144	0.523992	0.561982	0.10502	0.0814131	0.0638041	0.900106	0.965365	0.9324	0.490658	0.790366	0.55926
P70333	0.66181	0.49237	0.459364	1.04236	1.03568	1.00261	0.649692	0.766935	0.66306	0.537848	1.02688	0.693229	0.108616	0.0212902	0.0641804	1.90925	1.28889	1.48131	0.00156665	0.0998463	0.00102889
Q05D44	0.66214	0.67104	0.615253	0.879513	0.911277	0.696798	0.72697	0.79242	0.780484	0.649478	0.829196	0.766625	0.0299717	0.115755	0.0348567	1.27671	1.18037	1.08162	0.0598398	0.0115664	0.420662
P07607	0.66254	0.677266	0.819014	0.964349	0.757407	0.95553	0.810139	0.529165	0.661977	0.719607	0.892428	0.667094	0.0864035	0.117015	0.140557	1.24016	0.927025	1.33779	0.108714	0.610788	0.0997559
Q9QYJ0	0.66263	0.54591	0.562527	0.650941	0.530273	0.539484	0.435411	0.581479	0.569412	0.590355	0.573566	0.528768	0.0631409	0.0671668	0.0810741	0.97156	0.895676	1.08472	0.768185	0.357864	0.502016
Q9ESL4	0.664187	1.02514	1.07775	0.42915	0.602372	0.480606	0.81253	0.744904	0.614125	0.922357	0.504043	0.723853	0.225124	0.0889578	0.100864	0.546472	0.784786	0.696333	0.040211	0.235838	0.0473014
Q5NCF2	0.664666	0.623749	0.745597	0.698055	0.718292	0.677138	0.708329	0.663607	0.632574	0.678004	0.697829	0.66817	0.0620093	0.020578	0.0380831	1.02924	0.985496	1.04439	0.626978	0.826428	0.300998
Q8VDQ1	0.665235	0.650732	0.454471	0.355983	0.432024	0.474133	0.455932	0.439086	0.353215	0.590146	0.420713	0.416077	0.117722	0.0598815	0.0550882	0.712897	0.705042	1.01114	0.0904168	0.0811658	0.926135
Q922D8	0.665625	0.652115	0.728886	0.664582	0.735353	0.733328	0.764118	0.681706	0.675375	0.682208	0.711088	0.707066	0.0409842	0.0402876	0.0495097	1.04233	1.03644	1.00569	0.433209	0.539614	0.91836
P17439	0.666139	0.634463	0.684406	0.873404	0.74574	0.888733	0.991872	0.958092	0.895253	0.661669	0.835959	0.948406	0.0252699	0.0785067	0.0490324	1.26341	1.43335	0.881436	0.0215743	0.000842576	0.103167
Q9DC16	0.666995	0.589665	0.559119	0.554376	0.413294	0.366021	0.724944	0.670435	0.612674	0.60526	0.444564	0.669351	0.0556034	0.0979935	0.056143	0.734501	1.10589	0.664172	0.0689209	0.232758	0.0261157
P61967	0.667697	0.526057	0.547423	0.756664	0.770063	0.71353	0.832181	0.667635	0.800206	0.580393	0.746752	0.766674	0.0763589	0.0295414	0.0872473	1.28663	1.32096	0.974016	0.0244645	0.0496752	0.726976
Q8K010	0.670047	0.688465	0.651336	0.413468	0.546802	0.418235	0.747705	0.610665	0.686319	0.669949	0.459502	0.681563	0.0185649	0.075642	0.0686436	0.685875	1.01734	0.674188	0.00944814	0.791303	0.019682
Q9D020	0.670369	0.875251	0.967746	0.902656	0.88791	0.985375	0.704632	0.79039	0.705414	0.837789	0.925314	0.733479	0.152187	0.0525343	0.0492883	1.10447	0.875493	1.26154	0.399708	0.321867	0.00993674
Q6A0A9	0.670951	0.543567	0.690813	0.656053	0.69128	0.635828	0.665186	0.957945	0.734202	0.63511	0.661053	0.785778	0.0798982	0.0280625	0.153042	1.04085	1.23723	0.841273	0.623772	0.205174	0.237328
Q9D8W5	0.672462	0.855882	0.759054	0.880789	0.871743	0.801212	0.855127	0.871581	0.938751	0.762466	0.851248	0.888486	0.0917578	0.0435678	0.0443009	1.11644	1.16528	0.958088	0.204614	0.0988434	0.357875
Q60737	0.672483	0.530232	0.516448	0.695279	0.638101	0.693308	0.652565	0.57416	0.628951	0.573054	0.675563	0.618559	0.0863828	0.0324581	0.040222	1.17888	1.07941	1.09216	0.126681	0.454651	0.128701
Q99JI4	0.672486	0.792544	0.819996	1.007	0.936532	0.919581	1.06254	1.00271	1.03648	0.761675	0.954373	1.03391	0.0784506	0.0463616	0.0299986	1.25299	1.35742	0.923071	0.02153	0.00494711	0.0671389
O08917	0.674303	0.63818	0.677797	1.34624	0.945061	1.4636	0.855459	0.937815	0.799707	0.663426	1.25163	0.864327	0.0219339	0.271909	0.0694799	1.88662	1.30282	1.4481	0.0202133	0.00880203	0.0751403
Q9D2V8	0.676515	0.845313	0.938165	1.1066	0.970406	1.02382	0.694934	0.828778	0.789958	0.819998	1.03361	0.771223	0.132649	0.0686248	0.0688606	1.26051	0.940519	1.34022	0.0684054	0.602108	0.00948442
E9Q7G0	0.676522	0.509898	0.579313	0.507722	0.57138	0.519862	0.430969	0.462947	0.461736	0.588578	0.532988	0.451884	0.0836974	0.0337979	0.0181227	0.905553	0.767756	1.17948	0.346213	0.0506053	0.0215234
Q8CHW4	0.677089	0.59676	0.87758	0.715231	0.688885	0.688735	1.20844	0.868369	1.12859	0.717143	0.697617	1.06846	0.144631	0.0152543	0.177827	0.972772	1.48989	0.652915	0.827527	0.0567022	0.0227811
Q8C570	0.677509	0.611189	0.481813	0.932871	0.615253	0.777736	0.561742	0.607155	0.598221	0.59017	0.775287	0.589039	0.0995269	0.158823	0.0240582	1.31367	0.998084	1.31619	0.162315	0.985652	0.115032
Q9D1M0	0.679005	0.481315	0.483323	0.421249	0.659631	0.439154	0.491614	0.421466	0.489439	0.547881	0.506678	0.467506	0.113561	0.132763	0.0398871	0.924795	0.853299	1.08379	0.703835	0.311801	0.650165
Q3UPL0	0.679546	0.706626	0.692282	0.557162	0.585497	0.604752	0.955555	0.886732	0.968235	0.692818	0.58247	0.936841	0.013548	0.0239392	0.0438564	0.840726	1.35222	0.621739	0.0022538	0.000772845	0.000252224
Q8CJ26	0.680407	0.555641	0.658885	0.38161	0.41379	0.452155	0.79678	0.662319	0.744647	0.631644	0.415852	0.734582	0.0666946	0.0353176	0.0677931	0.658364	1.16297	0.566107	0.00774702	0.134086	0.00194964
Q9D6Y9	0.68522	0.829431	0.837586	0.824375	0.83379	0.675137	0.575055	0.533526	0.476629	0.784079	0.777768	0.528404	0.0857117	0.0890052	0.0494127	0.991951	0.673916	1.47192	0.933758	0.0110228	0.0132352
Q99KV1	0.685433	0.767106	0.650506	0.897578	0.788961	0.987064	1.06817	0.905403	1.19492	0.701015	0.891201	1.05617	0.0598411	0.0992051	0.145134	1.2713	1.50662	0.843807	0.0467118	0.0172705	0.179422
Q921M3	0.687878	0.595361	0.686863	0.993607	0.847763	0.905403	0.94534	0.854464	0.884334	0.656701	0.915591	0.894713	0.0531242	0.0734537	0.0463183	1.39423	1.36244	1.02334	0.00778029	0.0042617	0.698464
Q9JLR9	0.688281	1.12618	1.15256	0.816404	1.0453	0.767969	1.02917	0.780452	1.11418	0.989008	0.876556	0.974603	0.260771	0.148126	0.173429	0.886298	0.985434	0.899398	0.551456	0.940325	0.497889
Q08943	0.68963	0.755904	0.878119	1.28025	0.995094	1.26294	1.14008	1.21099	1.1378	0.774551	1.17943	1.16296	0.0956178	0.159874	0.0416131	1.52273	1.50146	1.01417	0.0196982	0.0029719	0.871251
Q8K1M6	0.689827	0.820354	0.930373	0.544395	0.661297	0.542106	0.654491	0.685114	0.595856	0.813518	0.582599	0.645154	0.120419	0.0681634	0.0453556	0.716148	0.793041	0.90304	0.0445412	0.0860826	0.256295
Q9D710	0.690913	0.480253	0.507919	0.479979	0.533975	0.475683	0.633193	0.515799	0.456484	0.559695	0.496546	0.535158	0.114477	0.0324855	0.0899311	0.887172	0.956161	0.927848	0.410022	0.784852	0.522818
Q6ZQ08	0.691154	0.583029	0.762741	0.913854	0.632995	0.79864	0.765795	0.634418	0.822899	0.678975	0.78183	0.741037	0.0904729	0.141182	0.0966488	1.15149	1.09141	1.05505	0.347932	0.462358	0.700816
Q8CAY6	0.691253	0.805228	0.649236	0.323274	0.378809	0.385048	0.588211	0.478389	0.476335	0.715239	0.362377	0.514312	0.0807148	0.0340072	0.0640069	0.506652	0.719077	0.704586	0.00221818	0.0278278	0.0221447
Q60766	0.691828	0.754908	0.842262	0.846815	0.967627	0.729832	0.693487	0.830138	0.704632	0.762999	0.848091	0.742752	0.0755426	0.118903	0.0758833	1.11152	0.973464	1.14182	0.354508	0.7597	0.265481
P63082	0.694632	0.807843	0.776052	1.04544	0.920449	0.937746	0.563149	0.886755	0.604103	0.759509	0.96788	0.684669	0.0583904	0.067727	0.176205	1.27435	0.901462	1.41365	0.0156557	0.523447	0.0601398
P61028	0.695863	0.572512	0.509258	1.07053	0.668031	1.01167	0.657415	0.753508	0.937373	0.592544	0.916745	0.782765	0.094902	0.217394	0.142254	1.54713	1.32102	1.17116	0.0770492	0.126296	0.422221
P62196	0.698322	0.707097	0.714305	0.871672	0.906437	0.86738	1.06838	0.946007	1.09618	0.706575	0.881829	1.03686	0.0080047	0.0214183	0.0798956	1.24803	1.46744	0.850485	0.00018607	0.00205187	0.0314895
P63087	0.69867	0.518507	0.584464	0.769008	0.54824	0.762319	0.784205	0.740451	0.814388	0.600547	0.693189	0.779681	0.0911515	0.125574	0.0371752	1.15426	1.29828	0.889067	0.359509	0.0344532	0.316462
P62254	0.699227	0.862694	1.04071	0.56496	0.811354	0.784561	0.807947	0.741212	0.877183	0.867542	0.720292	0.80878	0.170791	0.135187	0.0679893	0.830267	0.932266	0.89059	0.30663	0.609296	0.368415
Q9ET66	0.699518	0.63397	0.511172	0.454151	0.443821	0.505821	0.502273	0.350387	0.486287	0.614887	0.467931	0.446316	0.0956118	0.0332175	0.0834605	0.761004	0.725851	1.04843	0.0657253	0.0828887	0.698233
Q8BSL7	0.700004	0.743981	0.647453	0.77504	0.743213	0.92414	0.802886	0.960607	0.754232	0.697146	0.814131	0.839242	0.0483272	0.0965908	0.107884	1.16781	1.20382	0.970079	0.133892	0.105788	0.778871
Q9WVK4	0.700749	0.746954	0.711636	1.30025	1.1399	1.40102	0.962948	1.00601	0.903689	0.71978	1.28039	0.957551	0.0241546	0.131687	0.051376	1.77886	1.33034	1.33715	0.00191884	0.00191721	0.0167356
Q7TMR0	0.701717	0.584901	0.598198	0.781096	0.584107	0.697045	0.704052	0.599387	0.653505	0.628272	0.687416	0.652315	0.0639517	0.0988469	0.0523427	1.09414	1.03827	1.05381	0.433336	0.640819	0.615622
Q78IK4	0.701915	0.980689	1.10248	0.62861	0.551129	0.459176	0.54073	0.711016	0.448469	0.928363	0.546305	0.566738	0.205347	0.0848197	0.133192	0.588461	0.610471	0.963946	0.0408004	0.0627015	0.833641
O08663	0.70244	0.592005	0.548234	1.00971	1.04992	1.09198	1.41312	0.966928	1.25344	0.614226	1.05054	1.21116	0.0794684	0.0411377	0.226081	1.71034	1.97185	0.867377	0.00107693	0.0125018	0.292646
P54227	0.702622	0.537582	0.771803	0.519783	0.714866	0.790893	1.08016	0.809949	1.18829	0.670669	0.675181	1.02614	0.120335	0.139844	0.194873	1.00673	1.53002	0.657984	0.968244	0.0547602	0.0643695
Q91YH5	0.703418	0.691297	0.822823	0.682908	0.69734	0.597881	0.798106	0.77479	0.715195	0.739179	0.659377	0.762697	0.0726904	0.0537431	0.0427582	0.892039	1.03182	0.864533	0.200996	0.654336	0.0596863
Q9DBZ5	0.703582	0.717809	0.691158	0.749573	0.841485	0.644315	0.998375	0.766611	0.922428	0.704183	0.745125	0.895805	0.013336	0.0986601	0.118154	1.05814	1.27212	0.831793	0.515633	0.0492457	0.165225
O88792	0.703731	0.427023	0.721281	0.748546	0.98756	0.924825	0.93455	0.615063	0.923324	0.617345	0.886977	0.824312	0.165057	0.12392	0.181302	1.43676	1.33525	1.07602	0.0864226	0.217532	0.647047
Q99K85	0.704127	0.64545	0.61361	0.672763	0.723638	0.695149	0.973086	0.829981	0.970713	0.654396	0.697183	0.924593	0.0459164	0.0254981	0.081945	1.06538	1.4129	0.754043	0.23106	0.00758517	0.0101095
Q8K2T1	0.705322	0.562194	0.654859	0.822967	0.887252	0.981785	0.868422	0.670669	0.918136	0.640792	0.897334	0.819076	0.0725936	0.0798877	0.130906	1.40035	1.27822	1.09555	0.0146549	0.10809	0.426691
Q501J6	0.70706	0.577412	0.622383	0.939539	0.743442	0.829683	0.821974	0.778475	0.744244	0.635618	0.837554	0.781564	0.0658294	0.0982853	0.0389572	1.3177	1.22961	1.07164	0.0416896	0.0298019	0.410905
Q8R146	0.707937	0.779219	0.694785	0.752693	0.74014	0.974347	0.761328	0.718547	0.832785	0.727314	0.822393	0.770887	0.0454297	0.131745	0.0577154	1.13073	1.05991	1.06681	0.30277	0.362251	0.568684
Q9DCV4	0.708427	0.727457	0.760994	0.402392	0.372586	0.329401	0.49178	0.509481	0.465244	0.732292	0.368126	0.488835	0.0266151	0.0366991	0.0222649	0.502704	0.667541	0.753068	0.000154741	0.000263137	0.00821564
Q60865	0.708615	0.679808	0.740985	0.980974	1.04487	1.07617	1.23258	1.19165	1.19374	0.709803	1.034	1.20599	0.0306061	0.0485179	0.0230484	1.45675	1.69905	0.85739	0.000610396	2.33899e-05	0.00517091
Q3TXS7	0.709066	0.677922	0.685225	0.933969	0.786567	0.878072	1.06857	0.876894	0.979572	0.690738	0.866203	0.975011	0.0162875	0.0744142	0.095918	1.25403	1.41155	0.888403	0.0162698	0.00717623	0.195516
Q7TNV0	0.7092	0.568947	0.624089	1.09122	0.845256	0.960784	0.493216	0.566192	0.64054	0.634079	0.965754	0.566649	0.0706579	0.123058	0.0736631	1.52308	0.893657	1.70432	0.0154955	0.316356	0.00852379
P63005	0.711483	0.766742	0.762212	0.820059	0.895816	0.933674	0.940305	0.738798	1.00486	0.746812	0.883183	0.894655	0.0306793	0.0578515	0.138782	1.1826	1.19797	0.987177	0.0226156	0.145961	0.901245
Q91YR9	0.711578	0.775021	0.773493	1.2842	0.98405	1.20106	0.936219	0.822531	1.08525	0.753364	1.15644	0.948	0.0361954	0.154972	0.131755	1.53503	1.25836	1.21987	0.011811	0.0691489	0.150583
O89112	0.71216	0.766937	0.820938	0.501254	0.520542	0.57693	0.595184	0.569375	0.621514	0.766679	0.532909	0.595358	0.0543895	0.0393245	0.0260704	0.695088	0.776542	0.895107	0.00380571	0.0079306	0.0836246
Q91VH2	0.712657	0.673175	0.651319	0.668942	0.611411	0.573136	0.832557	0.807861	0.655139	0.67905	0.617829	0.765186	0.0310879	0.0482245	0.0960996	0.909843	1.12685	0.807424	0.138293	0.213707	0.0765069
P48025	0.713239	0.468744	0.622382	0.661678	0.44237	0.74085	0.514333	0.310271	0.353414	0.601455	0.614966	0.392672	0.123584	0.154625	0.107546	1.02246	0.652871	1.5661	0.911589	0.0918976	0.110415
Q61425	0.713495	0.906785	0.935375	0.375436	0.513012	0.441751	0.452319	0.500947	0.489814	0.851885	0.4434	0.481027	0.120699	0.068803	0.0254772	0.520492	0.564661	0.921778	0.00701893	0.00648423	0.424581
Q62189	0.716006	0.897128	0.694787	1.10854	0.773242	1.06798	0.859924	0.873594	0.843737	0.769307	0.983255	0.859085	0.111204	0.183004	0.0149461	1.27811	1.1167	1.14454	0.158593	0.238042	0.306485
Q8BML9	0.716776	0.691218	0.697184	0.873823	0.873439	0.872014	1.13389	0.902866	1.09172	0.701726	0.873092	1.04283	0.0133703	0.000953036	0.123029	1.24421	1.48609	0.837236	2.46204e-05	0.00881396	0.0752073
Q8R1Q8	0.716937	0.694328	0.743967	0.814622	0.738086	0.762528	0.818161	0.769275	0.70986	0.718411	0.771745	0.765765	0.0248525	0.0390917	0.0542358	1.07424	1.06592	1.00781	0.116885	0.241171	0.884384
Q3TDQ1	0.717037	0.705176	0.687134	0.72254	0.679032	0.594976	0.681269	0.790361	0.703977	0.703116	0.665516	0.725202	0.0150574	0.0648474	0.0575597	0.946524	1.03141	0.917697	0.38334	0.555242	0.299049
O88531	0.717164	0.692183	0.769209	0.69902	0.71564	0.883617	0.854959	1.14713	0.890849	0.726185	0.766092	0.964312	0.0392976	0.102118	0.159337	1.05495	1.32791	0.794445	0.56188	0.0658312	0.143857
Q8CHP8	0.717527	1.29272	1.08458	1.15085	0.97826	1.03562	0.698151	0.735443	0.782921	1.03161	1.05491	0.738838	0.291233	0.0878976	0.0424867	1.02259	0.7162	1.4278	0.900857	0.159995	0.0049677
Q63932	0.718985	0.828649	0.873498	1.16077	0.978538	0.999185	0.867508	0.850687	0.955129	0.807044	1.04616	0.891108	0.0794901	0.0997873	0.0560782	1.29629	1.10416	1.174	0.0314827	0.208802	0.078836
Q148R4	0.719182	0.56585	0.642831	0.559579	0.777818	0.629265	0.782654	1.05539	1.24157	0.642621	0.655554	1.02654	0.0766662	0.111469	0.230816	1.02013	1.59743	0.638606	0.876522	0.0522236	0.0662788
Q8BHG2	0.722872	0.850261	0.804451	0.464613	0.428834	0.531718	0.652877	0.572989	0.61077	0.792528	0.475055	0.612212	0.0645262	0.0522308	0.039964	0.599417	0.77248	0.775965	0.00269441	0.0146738	0.0225117
Q8VDJ3	0.7261	0.629604	0.616544	0.629503	0.549617	0.640995	1.14546	1.07295	1.07896	0.657416	0.606705	1.09912	0.0598397	0.0497725	0.0402405	0.922863	1.67188	0.55199	0.322214	0.000446783	0.000183353
E9QA15	0.726673	0.827163	0.873231	0.622481	0.811623	0.612957	1.30274	0.802769	0.921826	0.809022	0.682354	1.00911	0.0749443	0.112052	0.261167	0.843431	1.24732	0.676192	0.178958	0.271167	0.11725
Q99LD4	0.727596	1.03657	0.886131	0.769814	0.698799	0.670835	0.993636	0.789012	0.94151	0.88343	0.713149	0.908053	0.154502	0.0510263	0.106336	0.80725	1.02787	0.785361	0.144104	0.831278	0.0458271
P97822	0.727716	0.753867	1.01389	1.302	0.943057	1.45618	1.2722	0.94936	1.17062	0.831826	1.23375	1.13073	0.158217	0.263283	0.165077	1.48318	1.35933	1.09111	0.0860734	0.086281	0.596589
Q5FWK3	0.729736	0.64718	0.663861	1.13851	1.09627	1.06494	0.91186	0.793697	0.845146	0.680259	1.09991	0.850234	0.0436528	0.0369214	0.0592456	1.61689	1.24987	1.29365	0.00022051	0.0161223	0.00345254
Q9WVE8	0.731858	0.564912	0.477655	0.612347	0.509767	0.613361	0.406837	0.489902	0.389299	0.591475	0.578492	0.428679	0.129167	0.0595194	0.0537405	0.97805	0.724763	1.34948	0.882027	0.11408	0.0317999
Q9D892	0.735187	0.810297	0.827251	0.646845	0.741401	0.845432	0.846156	0.720432	0.767204	0.790912	0.744559	0.777931	0.0489978	0.0993313	0.0635451	0.941394	0.983587	0.957103	0.50867	0.793219	0.64968
Q8BH24	0.735292	0.581839	0.707816	0.847802	0.791318	0.806646	1.14806	1.08109	1.12379	0.674983	0.815255	1.11765	0.0818259	0.0292095	0.0339068	1.20782	1.65582	0.729439	0.0489914	0.00097978	0.000304848
P63325	0.735707	1.03366	0.983599	1.56188	1.31203	1.36541	1.61476	1.45643	1.49318	0.917654	1.4131	1.52146	0.159547	0.131578	0.0828644	1.53991	1.65799	0.928784	0.0142654	0.00434766	0.293953
Q9CQN1	0.735874	0.781073	0.840799	0.480889	0.520813	0.426911	0.853755	0.759025	0.733718	0.785915	0.476204	0.782166	0.0526302	0.0471259	0.063276	0.605923	0.995229	0.608827	0.00161362	0.940895	0.00255789
Q63829	0.737386	0.656396	0.666961	0.813673	0.561159	0.824377	0.751283	0.790931	0.800402	0.686914	0.73307	0.780872	0.0440278	0.148975	0.0260586	1.06719	1.13678	0.938783	0.63395	0.0335062	0.613174
P26638	0.738234	0.755579	0.845316	0.909872	0.829076	0.902675	1.36826	0.978941	1.23962	0.77971	0.880541	1.1956	0.0574748	0.044715	0.198354	1.12932	1.5334	0.736482	0.0744931	0.025165	0.0550103
P80313	0.73828	0.838427	0.947745	1.26432	1.0849	1.17919	1.43125	1.23744	1.29613	0.841484	1.17614	1.3216	0.104766	0.0897509	0.0993853	1.39769	1.57056	0.889932	0.0136774	0.00451064	0.133052
Q8JZQ2	0.739077	0.874001	0.891331	0.691617	0.599368	0.624044	0.771717	0.801271	0.70271	0.834803	0.638343	0.758566	0.0833526	0.0477579	0.0505792	0.764663	0.908677	0.841513	0.0239665	0.247079	0.0402025
Q8BP48	0.739602	0.747262	0.812242	1.16793	1.13895	1.19628	1.15219	1.10324	0.885922	0.766369	1.16772	1.04712	0.0399118	0.0286655	0.141727	1.5237	1.36633	1.11518	0.000144944	0.0298618	0.22207
Q99NB9	0.739669	0.686477	0.651355	1.07102	0.909664	1.13649	0.923314	0.950465	0.889254	0.6925	1.03906	0.921011	0.0444637	0.116742	0.0306704	1.50044	1.32998	1.12817	0.00861667	0.00184617	0.165531
P52875	0.740977	0.714969	0.966865	1.08376	0.828003	0.812562	1.57476	1.32944	1.51058	0.807604	0.908109	1.47159	0.138536	0.152315	0.127223	1.12445	1.82217	0.617093	0.445451	0.00362245	0.00794177
Q3UPH1	0.741298	0.524308	0.582254	0.507109	0.461878	0.592876	0.728592	0.610532	0.750864	0.615953	0.520621	0.696663	0.112352	0.0665362	0.0754182	0.845229	1.13103	0.747307	0.274693	0.359935	0.038714
Q8CIN4	0.743056	0.689501	0.823503	1.35925	1.02629	1.36494	0.857307	0.9017	0.822781	0.75202	1.25016	0.860596	0.0674494	0.1939	0.0395624	1.66241	1.14438	1.45267	0.0136657	0.0739569	0.0270366
Q6P5E4	0.744046	0.621155	0.631786	0.673476	0.668387	0.647736	0.661031	0.645367	0.653521	0.665662	0.6632	0.653306	0.0680903	0.0136311	0.00783409	0.9963	0.981438	1.01514	0.953966	0.77045	0.337002
Q62418	0.745339	0.556086	0.526637	0.759808	0.636593	0.746529	0.528947	0.618201	0.636519	0.609354	0.71431	0.594556	0.118683	0.0676317	0.0575522	1.17224	0.975715	1.20142	0.254045	0.855396	0.079754
Q8BHD7	0.745598	0.778198	0.878879	1.51456	1.24055	1.43649	1.38671	1.28132	1.54082	0.800892	1.3972	1.40295	0.0694781	0.141169	0.130511	1.74455	1.75173	0.995902	0.00278623	0.00213108	0.961174
F6ZDS4	0.74574	0.575276	0.664765	0.578737	0.643899	0.623971	0.559392	0.579765	0.601989	0.661927	0.615536	0.580382	0.085267	0.0333898	0.021305	0.929915	0.876807	1.06057	0.429771	0.183323	0.199041
Q8CFE4	0.748478	0.87718	0.620454	0.82463	0.60149	1.00755	0.983745	0.891236	0.850863	0.748704	0.811224	0.908615	0.128363	0.203363	0.0681243	1.0835	1.21358	0.892814	0.675829	0.129348	0.475543
Q9EST1	0.74924	1.00642	1.19578	1.07804	0.940071	1.39051	1.92981	1.27921	1.94437	0.983813	1.13621	1.7178	0.224125	0.230787	0.379901	1.1549	1.74606	0.661432	0.458019	0.0449135	0.0860883
P55258	0.749707	0.767093	0.789879	1.14703	0.801029	1.00655	0.881268	0.790498	0.911301	0.768893	0.98487	0.861023	0.0201465	0.174015	0.0628948	1.28089	1.11982	1.14384	0.0995957	0.0730626	0.31082
Q60866	0.750201	0.921391	1.00729	0.487017	0.772299	0.576534	0.610939	0.566324	0.424487	0.892961	0.61195	0.533917	0.130882	0.145901	0.0973587	0.685304	0.597917	1.14615	0.0679736	0.0189013	0.483956
Q3UV70	0.750343	0.848537	0.888082	0.44642	0.589062	0.338121	0.364726	0.446045	0.454147	0.828987	0.457868	0.421639	0.0709199	0.125862	0.0494547	0.552322	0.50862	1.08592	0.0112516	0.00122755	0.666759
Q6PDQ2	0.75138	0.728695	0.759245	0.95423	0.856529	0.929666	0.954179	0.792353	0.841231	0.74644	0.913475	0.862588	0.0158627	0.0508231	0.0829999	1.22378	1.1556	1.05899	0.00556505	0.0759318	0.416353
Q9QWR8	0.751576	0.610663	0.771036	0.675409	0.757922	0.770083	0.584664	0.857986	0.767707	0.711092	0.734471	0.736785	0.0875165	0.0515099	0.13926	1.03288	1.03613	0.996859	0.710436	0.800107	0.979757
Q91V12	0.751973	0.64859	0.863668	1.36275	0.966877	1.29652	1.25134	0.868274	1.19704	0.754743	1.20872	1.10555	0.107566	0.212041	0.207275	1.60149	1.4648	1.09331	0.0297359	0.059925	0.579266
P54775	0.752802	0.736304	0.796893	0.747721	0.840951	0.86577	1.04496	0.929344	1.01236	0.762	0.818147	0.995558	0.031324	0.0622406	0.059614	1.07368	1.30651	0.821798	0.235294	0.00386572	0.0234715
P16675	0.75321	0.741544	0.844937	0.896045	0.726771	1.0995	1.21246	1.22632	1.34389	0.779897	0.907439	1.26089	0.0566275	0.186626	0.0722096	1.16354	1.61674	0.719681	0.320631	0.00081608	0.0376836
Q8BSY0	0.754488	0.825213	0.797073	0.487726	0.468947	0.480013	0.905442	0.891647	0.832599	0.792258	0.478895	0.876563	0.0356072	0.0094391	0.0386931	0.604469	1.10641	0.546333	0.000123492	0.0499763	6.56074e-05
Q71LX4	0.755758	0.882414	0.852785	0.422436	0.530892	0.423437	0.74285	0.604387	0.581088	0.830319	0.458921	0.642775	0.0662491	0.0623303	0.0874469	0.552705	0.77413	0.713969	0.00210961	0.0415169	0.0413335
Q9WU78	0.75634	0.714377	0.755183	0.899304	0.854828	0.879892	0.8974	0.870771	0.846334	0.741967	0.878008	0.871502	0.0239005	0.0222981	0.025541	1.18335	1.17458	1.00747	0.00196322	0.0030362	0.756296
P17918	0.75733	0.731634	0.951295	0.81836	1.06404	0.872	1.14771	1.01847	1.2002	0.81342	0.918135	1.12213	0.120093	0.129176	0.0935282	1.12873	1.37952	0.818211	0.361912	0.0246112	0.0910715
Q99KK7	0.758636	0.708509	0.75639	0.957475	1.03429	0.964565	1.49561	1.02242	1.44751	0.741178	0.985444	1.32184	0.0283147	0.0424507	0.260426	1.32956	1.78344	0.745506	0.00115527	0.0184707	0.0918097
Q8VBT0	0.761655	0.547137	0.518311	0.865151	0.624076	0.716151	0.634302	0.646792	0.590261	0.609034	0.735126	0.623785	0.132957	0.121653	0.0296964	1.20704	1.02422	1.17849	0.292248	0.860368	0.198398
Q8R1B4	0.762537	0.896036	0.914937	1.25698	1.06187	1.13719	1.35084	1.24806	1.28988	0.857837	1.15201	1.29626	0.0830713	0.0983939	0.0516872	1.34293	1.51108	0.888719	0.0167221	0.00148515	0.087842
P58871	0.764932	0.570759	0.585447	0.340521	0.391963	0.461698	0.584354	0.503599	0.476958	0.640379	0.398061	0.521637	0.108116	0.0608179	0.0559241	0.621601	0.814576	0.763098	0.027697	0.166365	0.0606441
Q9D666	0.765556	0.747698	0.705688	0.414113	0.459051	0.354104	0.458284	0.496543	0.406146	0.739647	0.409089	0.453657	0.0307351	0.0526533	0.0453759	0.553087	0.613343	0.901758	0.000716424	0.000830155	0.329006
Q8C1A5	0.766339	0.919558	0.818255	0.701596	0.680967	0.949437	1.44276	0.951894	1.25842	0.834717	0.777333	1.21769	0.0779245	0.149402	0.247956	0.931254	1.45881	0.638366	0.586999	0.0631616	0.0578981
P29416	0.766464	0.638763	0.528493	0.917702	0.648045	0.985964	0.620004	0.65658	0.670258	0.644573	0.85057	0.648947	0.119092	0.178682	0.0259816	1.31959	1.00679	1.31069	0.171931	0.953421	0.125225
P53986	0.76647	1.27028	1.25604	1.33158	1.19622	1.23142	1.18466	1.6527	1.10503	1.0976	1.25308	1.31413	0.286852	0.0702306	0.295901	1.14166	1.19728	0.953539	0.413415	0.414269	0.745573
Q8R2Y8	0.766503	0.850296	0.931639	0.895484	0.882844	0.946712	1.04476	1.01814	0.886513	0.849479	0.908347	0.983136	0.0825711	0.0338212	0.0847304	1.0693	1.15734	0.923928	0.316916	0.122012	0.22866
Q6PB93	0.768685	0.743964	0.63942	0.70867	0.896934	0.687216	0.836279	0.7774	0.869032	0.717356	0.764273	0.82757	0.0686171	0.115387	0.0464329	1.0654	1.15364	0.923514	0.57763	0.0825666	0.427856
Q6PE01	0.76968	0.505086	0.588562	0.837768	0.754233	0.771005	0.772529	0.732405	0.697266	0.621109	0.787668	0.734066	0.135267	0.0441904	0.0376591	1.26816	1.18186	1.07302	0.112558	0.235937	0.185055
Q7TSV4	0.770274	0.78278	0.675492	0.675452	0.695729	0.833832	0.785737	0.654551	0.808492	0.742848	0.735005	0.749594	0.0586669	0.0861856	0.0830917	0.989441	1.00908	0.980538	0.902612	0.914092	0.843149
Q9JKB3	0.77038	1.02893	1.33085	0.774473	0.730437	0.559221	1.02595	0.772667	0.650403	1.04339	0.688044	0.81634	0.280517	0.113716	0.191545	0.659432	0.782393	0.842839	0.111785	0.311387	0.374945
P70168	0.770994	0.83227	0.783179	0.995423	1.00727	1.09445	1.30236	1.05167	1.19159	0.795481	1.03238	1.18187	0.0324374	0.0540811	0.125625	1.29781	1.48574	0.873511	0.00287925	0.00670635	0.131269
Q9Z1X4	0.771264	0.794968	0.712982	0.843381	1.00481	0.740956	0.911583	0.747893	0.82776	0.759738	0.863048	0.829079	0.0421906	0.13302	0.0818533	1.13598	1.09127	1.04097	0.269026	0.262144	0.725524
Q8CGC7	0.773217	0.789059	0.825596	0.772099	0.79823	0.779742	1.27992	1.06786	1.12208	0.795957	0.783357	1.15662	0.0268622	0.0134349	0.110168	0.98417	1.45311	0.677284	0.507692	0.00529737	0.00432584
P46467	0.773746	1.01021	1.0234	1.54395	1.41525	1.69389	1.41213	1.32412	1.29021	0.935786	1.55103	1.34215	0.140485	0.139453	0.0629279	1.65746	1.43425	1.15563	0.00575544	0.0102423	0.0772639
Q68FG2	0.774374	0.541328	0.743259	0.602377	0.649137	0.616266	0.764174	0.645566	0.744609	0.68632	0.622593	0.718116	0.126527	0.0240135	0.0635872	0.907147	1.04633	0.866981	0.439719	0.717158	0.071658
Q9CR60	0.776746	0.7368	0.660653	0.721613	0.560854	0.696122	0.874436	0.703382	1.05105	0.724733	0.65953	0.87629	0.0589793	0.0864006	0.173842	0.910031	1.20912	0.752639	0.341085	0.225954	0.125243
Q8BIJ6	0.776832	0.8648	0.856961	0.606388	0.710885	0.613213	0.657442	0.76474	0.610763	0.832864	0.643495	0.677648	0.0486835	0.0584609	0.0789522	0.772629	0.813636	0.949601	0.0125326	0.0441887	0.579546
Q8C0E2	0.778095	0.692134	0.761684	0.96026	0.853317	0.909519	0.670643	0.640545	0.743848	0.743971	0.907699	0.685012	0.0456362	0.0534945	0.0531293	1.22007	0.920751	1.32508	0.0156944	0.218572	0.00690626
Q9DCB8	0.778621	0.77117	0.772842	0.434723	0.634053	0.456194	0.394112	0.443977	0.432379	0.774211	0.508323	0.42349	0.00390944	0.109413	0.026094	0.65657	0.546995	1.20032	0.0136255	2.10894e-05	0.261497
D3YXK2	0.779784	0.835897	0.76692	0.755246	0.807424	0.699241	0.940597	0.593569	0.601041	0.7942	0.75397	0.711736	0.0366788	0.0541029	0.198235	0.949345	0.896166	1.05934	0.346476	0.51774	0.739823
Q9R1P4	0.780304	0.84614	0.902333	1.18138	1.07039	1.31747	1.61212	1.18849	1.48707	0.842925	1.18975	1.42923	0.0610777	0.123756	0.217661	1.41145	1.69556	0.83244	0.0121308	0.0108889	0.172934
Q78ZA7	0.780799	0.845585	1.1456	0.811615	0.871965	0.767968	0.792154	0.831365	0.711862	0.923994	0.817183	0.77846	0.194631	0.0522217	0.0609168	0.884402	0.842495	1.04974	0.410534	0.284079	0.450245
O55142	0.781478	0.675015	0.899809	0.809074	0.910524	0.791391	1.16627	1.00693	1.07827	0.785434	0.836996	1.08382	0.112449	0.0642877	0.0798127	1.06565	1.3799	0.772264	0.528432	0.0199826	0.014014
Q5SUR0	0.781905	0.734266	0.769111	1.15672	0.921525	1.29433	1.1881	0.889384	1.10998	0.761761	1.12419	1.06249	0.0246555	0.188519	0.154916	1.47578	1.39478	1.05808	0.0298835	0.029365	0.683985
Q8BGH2	0.781985	1.19811	1.16369	0.686803	0.853808	0.531197	0.704259	0.762892	0.521832	1.04793	0.690603	0.662995	0.230955	0.161339	0.125716	0.659017	0.632672	1.04164	0.0929815	0.0642864	0.826626
Q6URW6	0.782097	0.758866	0.839707	0.503227	0.765619	0.495966	0.638657	0.512602	0.478938	0.793557	0.588271	0.543399	0.041621	0.153631	0.0841956	0.741309	0.684764	1.08258	0.0892244	0.00993109	0.680249
A2ADY9	0.782868	0.445907	0.669975	0.546748	0.766113	0.716046	0.57389	0.643805	0.600955	0.632916	0.676302	0.606217	0.17151	0.114956	0.035253	1.06855	0.957815	1.11561	0.734314	0.804741	0.369809
Q60770	0.783283	0.83993	0.808475	0.573865	0.531077	0.577174	0.535422	0.487768	0.548429	0.810563	0.560705	0.523873	0.0283811	0.0257121	0.031937	0.691748	0.646308	1.07031	0.000349478	0.000313232	0.194707
Q6DVA0	0.783674	1.31858	1.28553	0.814137	0.931695	0.60744	0.623565	0.856811	0.65036	1.12926	0.784424	0.710245	0.299743	0.164157	0.127635	0.694635	0.628947	1.10444	0.155434	0.0898394	0.570096
G3X972	0.784361	0.692436	0.767418	0.736621	0.649911	0.802398	0.762358	0.673841	0.836268	0.748072	0.729643	0.757489	0.0489208	0.0764826	0.0813226	0.975365	1.01259	0.963239	0.742899	0.871884	0.687993
P60122	0.784775	0.665647	0.702717	0.953379	0.697672	1.01737	0.841498	0.887095	0.832895	0.717713	0.889474	0.853829	0.0609635	0.169159	0.0291283	1.23932	1.18965	1.04175	0.173363	0.0251366	0.737274
Q9D7X3	0.784842	0.888462	0.659772	0.498518	0.642564	0.594868	0.796397	0.858598	0.739847	0.777692	0.57865	0.79828	0.114513	0.0733796	0.0593979	0.74406	1.02647	0.72487	0.0643341	0.795911	0.0157403
Q9D0B6	0.78589	0.584734	0.77519	0.926597	0.787877	1.06554	0.897413	0.793179	0.761795	0.715271	0.92667	0.817462	0.113175	0.13883	0.0709955	1.29555	1.14287	1.13359	0.110412	0.255837	0.291841
P23116	0.788937	0.840654	0.924295	1.15609	1.20333	1.11278	1.30742	1.15098	1.23695	0.851296	1.1574	1.23178	0.0683036	0.0452887	0.0783461	1.35957	1.44695	0.939615	0.00294116	0.00316877	0.227645
Q7TMB8	0.789403	0.771507	0.78407	1.02964	0.887382	1.02145	0.860759	0.897949	0.83997	0.78166	0.979492	0.866226	0.00918795	0.0798744	0.0293733	1.25309	1.10819	1.13076	0.0130347	0.00891054	0.0824659
Q9JKR6	0.789489	0.622592	0.631869	0.864739	0.794302	0.860955	0.955703	0.884229	0.926236	0.681317	0.839999	0.922056	0.0937949	0.0396197	0.0359198	1.23291	1.35334	0.911006	0.0541312	0.0142423	0.0565291
P47811	0.789811	0.95652	0.806531	1.35873	1.18112	1.31094	0.796528	0.840814	0.834505	0.850954	1.2836	0.823949	0.0918045	0.0919082	0.0239558	1.50842	0.968265	1.55786	0.00448251	0.647858	0.00110812
Q920E5	0.789819	0.642051	0.724191	0.830339	0.732047	0.599386	0.808775	0.620669	0.664661	0.718687	0.720591	0.698035	0.0740378	0.115902	0.0983938	1.00265	0.971265	1.03231	0.982018	0.785883	0.809883
Q8K021	0.790053	0.808173	0.938093	0.527292	0.611842	0.636586	0.787669	0.749989	0.781066	0.84544	0.591907	0.772908	0.0807503	0.0573092	0.0201211	0.700117	0.914208	0.765818	0.0113798	0.205652	0.00669106
Q9WV80	0.791075	0.733188	0.802306	0.776356	0.75289	0.863289	0.926171	1.07021	1.01262	0.775523	0.797512	1.003	0.0370905	0.0581608	0.0724996	1.02835	1.29332	0.795126	0.610259	0.00841118	0.0186289
Q8BFR4	0.791182	0.579951	0.485333	0.48816	0.710013	0.789472	0.477185	0.529866	0.435531	0.618822	0.662548	0.480861	0.156586	0.156163	0.0472751	1.07066	0.777058	1.37784	0.749238	0.217836	0.126002
Q9QYB1	0.792872	0.725474	0.900484	0.568013	0.800179	0.701036	0.678116	0.786115	0.702241	0.806277	0.689743	0.722157	0.0882716	0.116494	0.056687	0.855467	0.895669	0.955115	0.239426	0.237204	0.687103
Q7TMK9	0.79464	0.805677	0.883477	1.12246	1.04903	1.06577	1.17575	1.10098	1.00786	0.827932	1.07909	1.09486	0.0484194	0.038486	0.0841105	1.30335	1.32241	0.985589	0.00215363	0.00888	0.782353
Q7TT45	0.795877	1.08653	0.917128	0.879422	0.812779	0.769434	1.06081	0.868605	0.950422	0.93318	0.820545	0.959947	0.145992	0.0554037	0.0964572	0.8793	1.02868	0.854782	0.279651	0.804138	0.095745
Q9CXY6	0.798533	0.695251	0.794739	0.93341	0.811608	0.893446	0.943508	0.798443	0.807021	0.762841	0.879488	0.849657	0.0585652	0.0620889	0.0813902	1.15291	1.11381	1.03511	0.077062	0.20809	0.640287
Q8BLF1	0.799305	0.715036	0.679743	0.724198	0.694722	0.630856	0.545048	0.574979	0.45854	0.731361	0.683258	0.526189	0.0614298	0.0477147	0.0604665	0.934228	0.719465	1.2985	0.344437	0.0145793	0.0241872
Q922H4	0.800126	0.708479	0.790725	0.495036	0.699611	0.695582	0.865586	0.764752	0.730408	0.766443	0.630076	0.786916	0.0504183	0.116965	0.0702615	0.822078	1.02671	0.800691	0.137287	0.702796	0.117328
P17426	0.800597	0.811743	0.730638	0.740515	0.767558	0.795535	0.844939	1.01505	0.883965	0.780993	0.767869	0.914653	0.0439628	0.0275112	0.0891131	0.983196	1.17114	0.83952	0.683802	0.0802692	0.0526586
Q8BTZ7	0.801395	0.642867	0.622797	0.770392	0.764151	0.784643	0.858056	0.70818	0.838812	0.689019	0.773062	0.801683	0.0978359	0.0105037	0.0815453	1.12197	1.16351	0.9643	0.213136	0.200253	0.579073
Q9CQ80	0.802383	0.790379	0.781088	0.815157	0.822904	0.815508	0.692504	0.662606	0.640243	0.791283	0.817856	0.665118	0.0106764	0.00437497	0.0262208	1.03358	0.840556	1.22964	0.016278	0.00151661	0.000572622
Q9CPN9	0.803168	1.11803	1.39386	0.991098	0.706396	0.63076	0.837722	1.19395	0.787023	1.10502	0.776084	0.939566	0.295563	0.190009	0.221758	0.702326	0.850271	0.826003	0.180236	0.481307	0.387139
Q63850	0.803378	0.541804	0.62847	0.80178	0.643514	0.900306	0.665345	0.627466	0.701202	0.657884	0.781867	0.664671	0.133244	0.129549	0.0368726	1.18846	1.01032	1.17632	0.312201	0.936325	0.20628
O55131	0.803417	0.613638	0.511751	0.645638	0.565893	0.750512	0.805654	0.780937	0.770978	0.642935	0.654014	0.785856	0.148024	0.0925944	0.0178537	1.01723	1.22229	0.832232	0.917776	0.172189	0.0726376
Q9Z2I0	0.803796	1.05001	1.13786	0.745422	0.659604	0.680051	0.988144	0.934973	0.671526	0.997222	0.695026	0.864881	0.173175	0.0448257	0.169548	0.696962	0.86729	0.803609	0.0429832	0.397802	0.168739
Q9D7M1	0.803954	0.651783	0.78476	0.783205	0.944428	0.661038	0.70926	0.713582	0.773009	0.746832	0.796224	0.73195	0.0828724	0.142143	0.0356235	1.06613	0.980074	1.08781	0.630557	0.789258	0.489749
O70133	0.806038	0.767303	0.82656	1.25841	1.01908	1.08399	1.11201	1.0355	0.955787	0.799967	1.12049	1.03443	0.0300915	0.123771	0.0781152	1.40067	1.29309	1.08319	0.0120766	0.00833156	0.366056
Q9CQM9	0.808404	0.868733	0.934053	0.643633	0.647227	0.763853	0.996021	0.837754	0.886601	0.870396	0.684904	0.906792	0.0628411	0.068395	0.0810422	0.786887	1.04182	0.755304	0.0258396	0.571994	0.0222759
Q9CQI3	0.808535	0.725295	0.712589	0.526554	0.716894	0.63753	0.539029	0.531049	0.564278	0.748806	0.626992	0.544786	0.0521152	0.0956066	0.0173461	0.837323	0.727539	1.1509	0.124713	0.00300213	0.216689
P48771	0.808971	1.29898	0.794024	0.99377	0.63578	0.905243	1.11827	0.964414	1.17216	0.967325	0.844931	1.08495	0.287318	0.18646	0.107807	0.873472	1.1216	0.778775	0.569475	0.54308	0.125794
O54988	0.80951	0.70061	0.803607	1.19059	1.1873	1.20283	0.768658	0.599545	0.618062	0.771243	1.19357	0.662088	0.0612405	0.00818488	0.0927551	1.5476	0.858469	1.80274	0.000291377	0.164165	0.000587458
P35279	0.812313	1.02467	1.04225	1.47811	1.23821	1.38698	1.24762	1.12142	1.31215	0.959743	1.36777	1.22707	0.127981	0.121099	0.0970127	1.42514	1.27854	1.11466	0.0159828	0.0448701	0.191376
Q9WVA3	0.813373	0.824692	0.889097	1.31946	1.28282	1.2633	1.30084	1.12717	1.29519	0.842387	1.28852	1.24107	0.0408457	0.0285121	0.0986808	1.52961	1.47327	1.03824	0.000100801	0.00294736	0.468407
Q62470	0.813923	0.5899	0.744952	0.769039	1.06809	0.794101	0.907414	0.907815	0.724561	0.716258	0.877077	0.846597	0.114735	0.165896	0.105686	1.22453	1.18197	1.036	0.239434	0.221393	0.801671
Q3UIA2	0.814834	0.654926	0.747548	0.722154	0.715415	0.668413	0.671673	0.766967	0.714281	0.739103	0.701994	0.71764	0.0802878	0.0292762	0.0477357	0.949792	0.970961	0.978198	0.493824	0.710968	0.653731
P46471	0.818056	0.85657	0.927383	0.942254	0.982713	1.01903	1.18796	1.0466	1.0843	0.867337	0.981332	1.10629	0.0554531	0.0384065	0.0732038	1.13143	1.2755	0.887051	0.0429378	0.0107676	0.0589201
Q8K4F5	0.818352	1.03586	1.08138	0.530916	0.792784	0.622518	0.552317	0.602952	0.585341	0.978533	0.648739	0.580203	0.140576	0.132888	0.0257058	0.662971	0.592932	1.11812	0.0418492	0.00847472	0.429988
P21279	0.820039	0.643719	0.658215	0.553907	0.609346	0.422199	0.39909	0.578794	0.387815	0.707324	0.528484	0.455233	0.0978825	0.0961289	0.107155	0.747159	0.643599	1.16091	0.0868861	0.0396073	0.427905
Q9CZ30	0.820187	1.06056	0.989526	1.04097	1.21652	1.0595	1.11936	1.16597	1.14052	0.956759	1.10566	1.14195	0.123492	0.09645	0.0233416	1.15563	1.19356	0.968224	0.175121	0.0631572	0.560907
Q60631	0.820391	0.843807	1.00685	1.51214	1.23243	1.54813	0.817228	0.923874	1.11098	0.890349	1.4309	0.950693	0.101569	0.172819	0.1487	1.60712	1.06778	1.50511	0.00951361	0.592764	0.0218059
P62334	0.821447	1.02373	0.984058	1.51148	1.38974	1.40538	1.57398	1.31692	1.288	0.943077	1.43553	1.39297	0.107185	0.0662323	0.157431	1.52218	1.47704	1.03056	0.00248435	0.0149578	0.688235
Q8K411	0.822311	0.903148	0.922212	0.530319	0.700772	0.58282	0.936709	0.761753	0.834042	0.882557	0.604637	0.844168	0.0530383	0.0872961	0.0879165	0.685097	0.956502	0.716252	0.00922182	0.552543	0.0286049
Q9WUA2	0.823073	0.70554	0.880695	0.904992	0.883639	0.850003	1.18221	0.986891	1.13775	0.803103	0.879545	1.10228	0.0892687	0.0277223	0.102376	1.09518	1.37253	0.797929	0.229592	0.0188582	0.0220148
A3KMP2	0.829129	0.868607	0.578883	0.358368	0.560222	0.527274	0.396688	0.685227	0.520644	0.758873	0.481954	0.534186	0.15712	0.10829	0.144746	0.635092	0.70392	0.902222	0.0658101	0.142597	0.643035
Q9D0B0	0.830563	0.560372	0.520276	0.750141	1.00694	0.905902	0.909207	0.814841	0.796156	0.63707	0.88766	0.840068	0.168764	0.129366	0.0606004	1.39335	1.31864	1.05665	0.1108	0.121442	0.594844
P46664	0.831781	0.643427	0.693467	1.03269	0.929681	1.27791	0.812682	0.797048	0.840499	0.722892	1.08009	0.816743	0.0975635	0.178889	0.022008	1.49413	1.12983	1.32244	0.0385414	0.179423	0.0646131
O08808	0.832102	0.989261	0.862861	1.70661	1.14096	1.35748	0.990521	0.876768	1.06287	0.894741	1.40168	0.97672	0.0832888	0.285405	0.0938169	1.56658	1.09162	1.43509	0.0418313	0.320961	0.0704437
Q9D7J7	0.832634	0.981438	1.09222	0.880039	0.788899	0.980722	1.18673	0.995992	1.25383	0.968765	0.88322	1.14552	0.130258	0.0959509	0.133767	0.911697	1.18245	0.771024	0.411565	0.176419	0.0508639
Q8BWY3	0.835049	0.834906	0.835943	1.20977	1.12781	1.21243	1.47109	1.14749	1.31569	0.835299	1.18334	1.31142	0.000561958	0.0481033	0.161842	1.41666	1.57	0.902331	0.000233351	0.00700469	0.259147
B2RXS4	0.835482	0.633449	0.686267	0.606586	0.734987	0.759742	0.694909	0.791152	0.681126	0.7184	0.700438	0.722396	0.104779	0.0822157	0.0599421	0.974998	1.00556	0.969604	0.826773	0.957024	0.72753
Q00915	0.835637	0.616588	0.648342	0.325	0.493496	0.391472	0.375415	0.463628	0.539163	0.700189	0.403323	0.459402	0.118371	0.0848708	0.081956	0.57602	0.656112	0.87793	0.0242256	0.0442623	0.456602
Q8K0C9	0.835776	0.737218	0.790767	0.81867	0.810242	0.92335	0.926091	1.02987	0.846924	0.78792	0.850754	0.934295	0.0493411	0.0630112	0.0917483	1.07975	1.18577	0.910584	0.245473	0.0716949	0.263441
Q99LS3	0.835982	0.851853	0.792928	0.566709	0.530114	0.687988	1.28559	0.922434	1.23105	0.826921	0.594937	1.14636	0.0304898	0.0826355	0.195831	0.71946	1.38629	0.518981	0.0103247	0.0492289	0.0108772
Q91VC4	0.836855	0.73544	0.787508	0.55268	0.647146	0.551622	0.719219	0.881809	0.70033	0.786601	0.583816	0.767119	0.0507139	0.054848	0.0997722	0.742201	0.975233	0.76105	0.00929548	0.778065	0.0493842
Q9CWZ7	0.836979	0.833944	0.724501	0.718555	0.641108	0.763069	0.877312	0.807211	0.834659	0.798475	0.707578	0.839727	0.0640807	0.0617171	0.0353242	0.886162	1.05166	0.842628	0.15151	0.384111	0.0323184
Q8BJ64	0.837747	1.08777	1.07702	0.656118	0.641055	0.657273	0.471583	0.763359	0.475667	1.00085	0.651482	0.570203	0.14135	0.00904832	0.167291	0.650932	0.569721	1.14254	0.0129272	0.0271336	0.448035
Q9CWK8	0.841908	0.917007	0.931616	0.8845	1.07639	1.13538	1.34408	1.78395	1.33056	0.896844	1.03209	1.4862	0.0481331	0.131174	0.257948	1.1508	1.65714	0.69445	0.168948	0.0176877	0.0530984
Q8C1C1	0.843582	1.3297	1.08075	0.915259	1.12038	1.27478	1.00362	1.33759	1.03991	1.08468	1.10347	1.12704	0.243081	0.180354	0.183242	1.01733	1.03906	0.979086	0.919537	0.821371	0.88153
A0A2I3BRL8	0.846394	0.824676	0.844661	1.56604	1.1385	1.4968	0.966979	1.22733	1.15962	0.838577	1.40045	1.11798	0.0120694	0.229479	0.135081	1.67003	1.33318	1.25266	0.0133167	0.0234101	0.140033
P35282	0.847084	0.955596	0.999686	1.44199	1.16624	1.32131	0.984519	0.992089	1.04024	0.934122	1.30985	1.00562	0.0785344	0.138229	0.0302231	1.40222	1.07654	1.30253	0.0149333	0.215108	0.020401
Q99JX3	0.847087	0.673888	0.735262	0.624605	0.457766	0.626344	0.861766	0.767668	0.87847	0.752079	0.569572	0.835968	0.0878158	0.0968306	0.0597361	0.757329	1.11154	0.681332	0.0729022	0.243102	0.0154056
Q8C6B0	0.849399	0.952721	0.718786	0.418368	0.578359	0.427359	0.443087	0.480634	0.417415	0.840302	0.474695	0.447046	0.117233	0.089888	0.0317947	0.56491	0.532006	1.06185	0.0127804	0.00496774	0.641859
O88746	0.856206	0.819117	0.853567	0.730159	0.674047	0.683857	0.725498	0.705017	0.683361	0.842963	0.696021	0.704625	0.0206937	0.0299684	0.0210711	0.825684	0.835891	0.987789	0.00220576	0.00125501	0.704981
Q8QZS1	0.85668	1.13926	1.20688	0.627067	0.668029	0.490863	0.591219	0.713037	0.550484	1.06761	0.59532	0.618246	0.185769	0.0927515	0.0845797	0.557622	0.579097	0.962917	0.0169644	0.0188904	0.767556
Q99K01	0.857696	0.630191	0.540803	0.587842	0.650242	0.621248	1.10471	0.812263	0.929162	0.67623	0.619777	0.948712	0.163386	0.0312258	0.147201	0.916519	1.40294	0.653283	0.58824	0.0984158	0.0193323
Q9Z2E1	0.858146	0.726377	0.623222	0.893743	0.724795	0.937415	0.638329	0.622921	0.69046	0.735915	0.851984	0.65057	0.117752	0.112293	0.0353947	1.15772	0.884028	1.3096	0.284233	0.295577	0.0414309
Q921E2	0.858371	0.793048	0.694383	1.31882	1.36317	1.36987	1.06368	1.06184	0.921342	0.781934	1.35062	1.01562	0.0825567	0.0277442	0.081654	1.72728	1.29886	1.32985	0.00034839	0.0252186	0.00254184
Q8C2Q3	0.858533	0.952144	0.80832	0.947797	0.519929	0.899803	1.01088	1.10932	1.02303	0.872999	0.789177	1.04775	0.0729949	0.234406	0.0536705	0.903984	1.20017	0.753214	0.58608	0.0288185	0.136023
P70349	0.858564	1.10228	0.986576	0.609042	0.847455	0.728695	0.657002	0.722473	0.691057	0.982472	0.728398	0.690178	0.121908	0.119207	0.0327444	0.741393	0.702491	1.05538	0.0612634	0.0159869	0.620696
P63085	0.860255	0.85069	0.919673	0.903563	0.909501	0.859567	0.793548	0.800007	0.736656	0.876873	0.890877	0.776737	0.0373736	0.0272771	0.034861	1.01597	0.885803	1.14695	0.627816	0.0274394	0.0111065
Q9R0X4	0.861193	0.970134	1.05423	0.637533	0.746003	0.543242	0.778485	0.813014	0.712487	0.961853	0.64226	0.767995	0.0967849	0.101463	0.0510779	0.667732	0.798454	0.836281	0.0168505	0.0373587	0.127686
P55772	0.861404	0.751311	0.781422	0.529796	0.476986	0.512133	0.63618	0.680349	0.75689	0.798046	0.506305	0.69114	0.0568981	0.0268832	0.0610738	0.634431	0.86604	0.732565	0.0013053	0.0907802	0.00866277
Q9JMA1	0.862112	0.887989	0.895803	1.10797	1.23715	1.13044	1.06567	1.0056	1.03289	0.881968	1.15852	1.03472	0.0176344	0.0690171	0.0300783	1.31356	1.17319	1.11964	0.00254744	0.00161779	0.0464835
O88696	0.862659	0.819525	0.86771	0.722988	0.66549	0.792226	0.748129	0.766324	0.759262	0.849964	0.726901	0.757905	0.0264819	0.0634585	0.00917335	0.855214	0.89169	0.959093	0.0362273	0.00471331	0.449425
Q8R0G9	0.86321	0.730438	0.878741	1.00932	0.735803	1.00698	0.898163	0.938646	0.740091	0.82413	0.917367	0.858967	0.0815105	0.157243	0.10492	1.11313	1.04227	1.06799	0.413459	0.673267	0.620946
Q9Z1Q9	0.86533	0.806837	0.92295	1.10926	1.09157	1.04793	1.10554	1.01681	1.03776	0.865039	1.08292	1.05337	0.0580566	0.0315678	0.0463767	1.25187	1.21771	1.02805	0.00465027	0.0117835	0.413204
Q9D8U8	0.865521	0.823448	0.804926	0.73421	0.870799	0.972493	1.04079	1.3557	1.10903	0.831298	0.859168	1.16851	0.0310506	0.119566	0.165665	1.03353	1.40564	0.73527	0.715896	0.0256954	0.0586464
P61164	0.867219	0.726364	0.891152	0.839322	0.628835	0.68623	0.89433	0.83435	0.887026	0.828245	0.718129	0.871902	0.0890394	0.108809	0.0327258	0.867049	1.05271	0.823635	0.246436	0.470023	0.0790248
Q8BGV3	0.867737	0.772049	0.786861	0.855908	0.824163	0.932376	0.830284	0.698621	0.818331	0.808882	0.870815	0.782412	0.0515052	0.0556255	0.0728108	1.07657	0.967276	1.11299	0.22998	0.634304	0.170022
Q64310	0.870091	1.14379	0.887896	1.24487	1.08443	1.36494	1.13338	1.07942	1.36455	0.96726	1.23141	1.19245	0.153141	0.140738	0.151466	1.27309	1.23281	1.03267	0.0926782	0.144405	0.760507
Q9Z2I8	0.870647	1.05352	1.03709	0.765445	0.828843	0.756179	0.744177	0.85938	0.702124	0.987088	0.783489	0.76856	0.101174	0.0395502	0.0814141	0.793738	0.778614	1.01942	0.0314864	0.0434772	0.789303
P62082	0.870989	0.761876	1.0693	1.10208	0.962406	0.935076	1.60418	1.06699	1.70339	0.90072	0.999853	1.45819	0.155851	0.0895771	0.342396	1.11006	1.61891	0.685681	0.393576	0.0621994	0.0883225
Q3UEB3	0.871502	0.657206	0.726342	0.90643	0.765311	0.925893	0.835987	0.924888	0.910044	0.751683	0.865878	0.890306	0.109372	0.0876358	0.0476239	1.15192	1.18442	0.972562	0.231002	0.114441	0.693231
P08003	0.872887	0.770644	0.682325	0.772727	0.698121	0.923663	1.11071	1.04599	1.17857	0.775285	0.79817	1.11176	0.0953654	0.114903	0.0663006	1.02952	1.434	0.717936	0.80378	0.00739773	0.0149224
Q91VM9	0.87316	0.578999	0.891863	0.49276	0.552433	0.467577	0.534323	0.629909	0.617361	0.781341	0.504257	0.593864	0.175482	0.0435807	0.0519445	0.645374	0.760058	0.849111	0.0567292	0.150676	0.0839509
Q7TNL5	0.873339	0.733406	0.742649	0.826526	0.845248	0.491676	0.7201	0.762761	0.499459	0.783131	0.72115	0.660774	0.0782587	0.19895	0.141322	0.920855	0.843758	1.09137	0.641943	0.259776	0.690336
Q91V64	0.873495	0.762326	0.857372	0.475105	0.521921	0.537966	0.622049	0.488888	0.549795	0.831065	0.511664	0.553577	0.0600724	0.0326617	0.0666612	0.615673	0.666106	0.924286	0.00126833	0.00586201	0.38347
Q9R1J0	0.873925	0.855313	0.836354	0.733194	0.710894	0.585979	0.780157	0.816782	0.815586	0.855197	0.676689	0.804175	0.0187861	0.0793444	0.0208086	0.791267	0.940339	0.84147	0.0192372	0.0344364	0.0545494
Q8K310	0.874016	0.775427	0.707037	0.827744	0.821771	0.84261	0.994902	0.835509	0.856883	0.785493	0.830708	0.895765	0.0839433	0.0107312	0.0865179	1.05756	1.14038	0.927374	0.407126	0.18828	0.265795
Q9DBP5	0.876942	1.043	1.19902	1.56368	1.37613	1.83005	1.81202	1.78069	1.98676	1.03965	1.58995	1.85982	0.161063	0.228098	0.111044	1.52931	1.78889	0.854895	0.0269416	0.00191008	0.139194
P31324	0.877951	1.17185	1.10716	0.754535	0.719606	0.526951	0.587191	0.690348	0.67033	1.05232	0.667031	0.64929	0.154435	0.122563	0.0547024	0.633865	0.617006	1.02732	0.0276628	0.0130456	0.83014
Q91YR1	0.878315	0.665218	0.695151	0.928776	0.858793	0.947759	1.50008	1.37691	1.50089	0.746228	0.911776	1.45929	0.115366	0.0468559	0.0713452	1.22185	1.95556	0.624807	0.0826857	0.000806968	0.000373379
P12382	0.88216	1.09806	1.26047	0.863961	0.754324	0.893434	0.908473	0.906984	0.998934	1.08023	0.83724	0.93813	0.189784	0.0733037	0.0526627	0.775056	0.868453	0.892456	0.107389	0.279552	0.124943
Q9EPK2	0.883181	0.711001	0.679368	1.34818	1.03443	1.49345	0.68487	1.03519	1.01227	0.75785	1.29202	0.910778	0.109686	0.234607	0.195977	1.70485	1.20179	1.41859	0.0233238	0.30359	0.0968766
Q9D0E1	0.883523	1.03833	0.998199	1.53831	1.20272	1.40034	1.36311	1.26352	1.69849	0.973352	1.38045	1.4417	0.0803411	0.168679	0.227887	1.41825	1.48118	0.957515	0.0195361	0.0283788	0.72726
Q64339	0.885421	1.03399	0.712419	0.669685	1.22691	0.97683	0.915814	1.29571	1.54682	0.877276	0.957809	1.25278	0.160939	0.279099	0.317684	1.0918	1.42803	0.764547	0.687374	0.141835	0.29352
O70318	0.885761	0.568513	0.690077	0.333099	0.481775	0.400639	0.513498	0.489645	0.46178	0.714784	0.405171	0.488307	0.160061	0.0744413	0.0258851	0.566844	0.683154	0.829746	0.0384811	0.0728168	0.141711
Q3U1J4	0.885828	0.984776	1.02341	0.88295	0.821941	0.844998	1.04504	0.970663	0.901608	0.96467	0.849963	0.972436	0.0709585	0.030806	0.0717315	0.881091	1.00805	0.874055	0.0620878	0.900384	0.0531351
Q9DCM0	0.886215	0.825458	0.999175	1.36672	0.83244	1.3393	0.892848	0.860679	0.91274	0.903616	1.17949	0.888756	0.0881559	0.300864	0.0262711	1.3053	0.983555	1.32712	0.202164	0.793499	0.170767
Q6P1F6	0.886953	0.831866	0.863774	0.760969	0.879099	0.797358	0.829385	0.782951	0.84868	0.860864	0.812475	0.820338	0.0276581	0.0604989	0.0337854	0.94379	0.952924	0.990415	0.276193	0.183197	0.853768
Q9R0M6	0.887235	0.772006	0.831063	0.564651	0.587925	0.556355	0.805881	0.702892	0.731662	0.830101	0.569644	0.746811	0.0576207	0.0163665	0.0531395	0.686234	0.899663	0.762768	0.00166446	0.139523	0.00526272
Q78PY7	0.888385	0.808227	0.834487	1.20104	1.16608	1.14399	1.34984	1.31866	1.32343	0.843699	1.17037	1.33065	0.0408654	0.028764	0.0167951	1.38719	1.57716	0.87955	0.000346877	4.43674e-05	0.00113258
Q9Z1Z2	0.888628	0.686332	0.749853	0.904295	1.04766	0.946185	1.14283	0.885021	1.02485	0.774938	0.966048	1.01757	0.103455	0.0737195	0.129061	1.24661	1.3131	0.94937	0.0596881	0.0639343	0.580612
Q9CQJ0	0.888919	0.923775	1.04453	1.05147	0.722917	1.06565	1.34052	1.09939	1.51297	0.952408	0.946679	1.31762	0.0816617	0.193913	0.207739	0.993985	1.38347	0.718474	0.964646	0.047156	0.0865956
Q9QZ23	0.889403	0.770198	0.745439	0.616313	0.681363	0.570591	0.639111	0.592972	0.604447	0.80168	0.622756	0.612177	0.0769725	0.0556661	0.0240209	0.776814	0.763618	1.01728	0.0310095	0.0152152	0.777541
P12388	0.892053	0.761874	0.927737	0.873205	1.27077	0.918619	0.781598	0.911818	1.1841	0.860555	1.02086	0.959171	0.0873021	0.21761	0.205385	1.18629	1.1146	1.06432	0.301885	0.486714	0.739059
Q9Z2N8	0.892864	0.917247	0.808914	1.13262	1.06904	1.11185	0.945019	0.823326	1.00813	0.873008	1.1045	0.925491	0.0568304	0.0324197	0.0939359	1.26517	1.06012	1.19342	0.00359225	0.454219	0.0355219
P51410	0.894524	0.986707	1.12928	1.352	0.985972	1.32863	2.0499	1.66027	1.71184	1.0035	1.2222	1.80734	0.118276	0.204913	0.211641	1.21793	1.80103	0.676243	0.184632	0.00455673	0.0262846
Q91VE0	0.895961	0.801324	0.789017	0.736501	0.501392	0.591798	0.66821	0.764401	0.597774	0.828767	0.609897	0.676795	0.0585155	0.118595	0.0836446	0.735908	0.816628	0.901155	0.0456247	0.061419	0.469345
P46460	0.896806	0.850435	0.829076	1.08277	1.00548	1.16733	1.25481	1.23995	1.27137	0.858772	1.0852	1.25537	0.0346258	0.0809519	0.0157199	1.26366	1.46182	0.86444	0.0112102	5.52131e-05	0.0232843
Q8BH04	0.89821	0.832699	0.797237	0.516304	0.515202	0.54023	0.916112	0.655108	0.755256	0.842715	0.523912	0.775492	0.0512264	0.0141429	0.131674	0.621695	0.92023	0.675587	0.000484446	0.456187	0.0302047
O35643	0.899472	1.12097	1.03491	1.05163	0.990736	1.1199	1.28519	1.42122	1.40078	1.01845	1.05409	1.36907	0.111661	0.0646152	0.0733532	1.03499	1.34427	0.769931	0.657291	0.0104526	0.00505407
Q91Z53	0.899825	1.20253	1.1686	0.617247	0.819599	0.643686	0.68177	0.647331	0.681543	1.09032	0.693511	0.670215	0.165843	0.109993	0.0198178	0.636063	0.614696	1.03476	0.0259674	0.0120949	0.736339
P17427	0.900032	0.911901	0.814731	0.78237	0.867311	0.919899	0.97256	1.23802	1.03137	0.875555	0.856527	1.08065	0.0530082	0.069396	0.139423	0.978268	1.23425	0.792602	0.725043	0.0758575	0.0672966
Q9Z0X1	0.901101	0.970951	1.00503	0.674596	0.723544	0.605884	0.787455	0.783407	0.626932	0.959026	0.668008	0.732598	0.0529794	0.0591059	0.0915316	0.696548	0.763898	0.911834	0.00315039	0.0206846	0.362561
Q9DCH4	0.904641	0.832132	0.850159	1.34063	1.30017	1.41169	1.72266	1.23259	1.48228	0.862311	1.35083	1.47918	0.0377511	0.0564543	0.245048	1.56652	1.71536	0.913231	0.000238661	0.0125531	0.42662
Q6NVF9	0.906619	0.674121	0.545877	0.824236	0.641268	0.964323	0.489893	0.648662	0.505584	0.708872	0.809942	0.548046	0.182865	0.162001	0.0874883	1.14258	0.773124	1.47787	0.513255	0.241369	0.06941
P23198	0.909297	0.591668	0.775078	1.04885	0.738841	1.12495	0.970035	0.99523	0.684867	0.758681	0.97088	0.883378	0.159448	0.204521	0.172376	1.27969	1.16436	1.09905	0.229373	0.409728	0.601249
P55264	0.911593	0.830747	0.861081	0.438741	0.657044	0.546774	0.549503	0.475542	0.513775	0.867807	0.54752	0.51294	0.0408402	0.109154	0.0369875	0.630923	0.591076	1.06741	0.00890482	0.000367564	0.630717
Q9CQT1	0.911716	0.855954	0.809707	0.694034	0.674312	0.673385	0.762986	0.627651	0.685025	0.859126	0.680577	0.691887	0.0510785	0.0116633	0.0679277	0.792174	0.805339	0.983653	0.00412228	0.0270709	0.790339
P36371	0.912472	0.930612	1.12496	1.14046	0.948574	0.966935	0.511358	0.71214	0.666596	0.989349	1.01866	0.630031	0.117795	0.105885	0.105266	1.02962	0.636814	1.61684	0.764641	0.0169663	0.0107541
Q9Z0L8	0.914138	1.06776	1.00283	1.25146	0.994585	1.52848	1.45028	1.53098	1.48337	0.994909	1.25818	1.48821	0.0771149	0.267013	0.0405664	1.26461	1.49583	0.845428	0.176204	0.000606291	0.214172
Q9Z204	0.914757	0.943245	0.798964	1.46921	1.03315	1.33419	1.2746	0.951352	1.18282	0.885656	1.27885	1.13626	0.0764161	0.223238	0.166579	1.44396	1.28296	1.12549	0.0447291	0.0769548	0.42534
Q8BQ47	0.915818	0.593329	0.714076	0.478708	0.441281	0.479029	0.852745	0.604943	0.900486	0.741074	0.466339	0.786058	0.162931	0.021702	0.158656	0.629275	1.0607	0.593263	0.0443387	0.749141	0.025861
Q8BG07	0.916168	0.710228	0.610846	0.453979	0.468756	0.722932	0.596123	0.640878	0.902202	0.745747	0.548556	0.713068	0.15573	0.151195	0.165317	0.735578	0.956179	0.769289	0.190698	0.815462	0.272326
Q9Z1G4	0.91648	0.696241	0.844616	0.916407	0.754611	0.674594	0.796144	1.1601	0.802552	0.819112	0.78187	0.919597	0.112313	0.12319	0.208302	0.954534	1.12268	0.850231	0.718502	0.50286	0.380071
Q7M6Y3	0.917943	0.95725	0.940794	1.23068	1.36901	1.29524	1.28902	1.61218	1.4653	0.938662	1.29831	1.4555	0.0197402	0.0692184	0.161806	1.38315	1.55061	0.892001	0.000980646	0.00535704	0.196759
Q9D967	0.918029	1.07469	1.08519	0.515656	0.777599	0.882607	0.674343	0.711357	0.815172	1.02597	0.725287	0.733624	0.0936284	0.188986	0.0730075	0.706927	0.715052	0.988637	0.068996	0.0130029	0.946604
O88544	0.918047	0.92317	1.00376	0.731115	0.924592	0.953112	1.09725	0.896406	1.07347	0.948326	0.869607	1.02238	0.0480771	0.120782	0.109739	0.916991	1.07808	0.850575	0.353447	0.34468	0.180239
Q6ZWX6	0.918247	0.864505	0.936501	1.41618	1.35595	1.44264	1.72384	1.17167	1.44899	0.906418	1.40492	1.44817	0.0374273	0.0444264	0.276084	1.54997	1.59768	0.97014	0.000119304	0.0280976	0.802068
P13597	0.918669	0.691086	0.85451	1.08357	1.55849	1.10475	0.734429	0.897794	0.78015	0.821422	1.24893	0.804124	0.117344	0.268289	0.0842801	1.52045	0.978942	1.55316	0.0647546	0.845849	0.0519238
P52912	0.919836	1.03975	0.910475	1.31369	1.08322	1.29331	1.35905	1.22171	1.71246	0.956687	1.23007	1.43107	0.0720869	0.127587	0.253179	1.28576	1.49586	0.859547	0.0319374	0.0354819	0.28678
Q62348	0.919897	0.559768	0.877151	0.952096	0.672083	0.801021	0.936558	0.735378	0.82492	0.785605	0.8084	0.832286	0.196746	0.140152	0.100792	1.02902	1.05942	0.971301	0.878094	0.733074	0.822383
P54726	0.920834	1.0182	1.1854	0.620449	0.835533	0.861768	0.972819	0.984937	0.972474	1.04148	0.772584	0.976743	0.13381	0.132404	0.00709838	0.741815	0.937844	0.790979	0.0686428	0.449811	0.0559862
P28063	0.925198	0.998414	1.06218	1.2591	1.28363	1.21681	0.682916	0.752957	0.764179	0.995263	1.25318	0.733351	0.0685433	0.0338017	0.0440371	1.25914	0.736841	1.70884	0.00427191	0.00509606	8.45594e-05
P70302	0.926673	1.09957	1.115	0.789596	0.710084	0.779641	0.566405	0.828272	0.641327	1.04708	0.759774	0.678668	0.104564	0.0433193	0.134868	0.725609	0.648151	1.11951	0.0117206	0.0201348	0.377477
Q9CQ45	0.926722	0.679898	0.888696	0.381739	0.599613	0.420061	0.723209	0.712903	0.610459	0.831772	0.467138	0.68219	0.132894	0.116316	0.0623343	0.561617	0.820165	0.684762	0.0232485	0.152319	0.0477035
P11983	0.9274	0.959893	1.04029	1.41385	1.36537	1.39171	1.44276	1.33347	1.41378	0.97586	1.39031	1.39667	0.0581117	0.0242715	0.0566227	1.42471	1.43122	0.995447	0.000337887	0.000849898	0.866797
P31230	0.928232	1.06753	0.582899	1.23957	0.916962	1.37176	1.4061	1.13953	1.41794	0.859554	1.1761	1.32119	0.249508	0.233948	0.157437	1.36826	1.53707	0.890178	0.184203	0.0535265	0.423179
Q8R5C5	0.929804	0.959236	0.902809	0.531711	0.74777	0.463785	0.767252	0.672068	0.581393	0.930616	0.581089	0.673571	0.0282225	0.148292	0.0929387	0.624413	0.72379	0.862699	0.01599	0.0101547	0.411826
Q8CGK3	0.931418	1.05811	1.13944	0.786691	0.777866	0.681578	0.875833	0.846231	0.789515	1.04299	0.748712	0.837193	0.104834	0.0583063	0.0438631	0.717851	0.802685	0.894312	0.013168	0.0349599	0.103603
Q9DB05	0.932376	1.0079	0.988925	1.0346	1.1808	1.05168	1.13036	1.03999	1.20156	0.9764	1.08903	1.12397	0.0392886	0.0799352	0.080973	1.11535	1.15114	0.968913	0.0936731	0.0468713	0.622968
Q9JII5	0.934192	0.98603	0.931176	1.34997	1.2149	1.24802	1.09308	1.10946	1.35565	0.950466	1.27096	1.18606	0.0308366	0.0704009	0.147097	1.3372	1.24788	1.07158	0.00194904	0.0532546	0.418197
P50580	0.937337	0.998363	1.00133	1.87081	1.58229	1.75669	2.17854	1.47175	1.98754	0.979009	1.7366	1.87928	0.0361194	0.145304	0.365623	1.77383	1.91957	0.924079	0.000934484	0.0132198	0.564008
Q9WUA3	0.938949	1.00233	1.25597	0.816353	0.959491	0.733471	0.737813	0.74541	0.854776	1.06575	0.836438	0.779333	0.167759	0.114341	0.0654461	0.784835	0.731253	1.07327	0.122063	0.0511146	0.494549
Q9CPR4	0.939215	0.725003	0.961873	1.39307	1.09124	0.89108	1.13095	1.07687	0.987124	0.875363	1.12513	1.06498	0.130708	0.252706	0.0726467	1.28533	1.21662	1.05648	0.203011	0.0930395	0.712173
Q8BK64	0.941376	1.08573	1.06063	0.937594	1.13774	1.10296	1.00646	0.941034	1.00234	1.02925	1.05943	0.983281	0.0771265	0.106937	0.0366447	1.02932	0.95534	1.07744	0.711983	0.403915	0.308117
Q6R0H7	0.942602	0.96079	1.01369	0.655296	0.645892	0.420782	0.594318	0.666344	0.422655	0.97236	0.57399	0.561106	0.0369285	0.132765	0.125193	0.590306	0.577055	1.02296	0.00745324	0.00548015	0.908563
P62192	0.943519	0.927338	0.920819	0.949849	1.00344	0.915933	1.01918	0.928901	0.897228	0.930559	0.956408	0.948436	0.0116872	0.0441212	0.0632801	1.02778	1.01921	1.0084	0.382172	0.655517	0.866655
P51863	0.945439	0.834546	0.826659	1.58932	1.19812	1.54088	1.15184	1.47794	1.30885	0.868881	1.44278	1.31288	0.0664178	0.213256	0.163086	1.6605	1.511	1.09894	0.0112442	0.0119945	0.449163
Q9WTM5	0.946331	0.875525	0.864813	1.30442	1.16731	1.29052	1.21832	1.188	1.22932	0.895556	1.25408	1.21188	0.0442972	0.075472	0.0214014	1.40034	1.35322	1.03482	0.00208291	0.000369913	0.404228
Q9EP69	0.94779	0.904984	0.964353	0.782364	0.678807	0.616034	0.803184	0.92383	0.79762	0.939042	0.692401	0.841545	0.0306357	0.0839941	0.0713151	0.737348	0.896173	0.822774	0.00878773	0.0952017	0.0789937
Q99LF4	0.948029	0.859651	0.817246	0.896277	0.878168	0.888067	0.945087	0.969507	0.932164	0.874975	0.887504	0.948919	0.0667244	0.00906741	0.0189643	1.01432	1.08451	0.935279	0.763394	0.138577	0.00717794
Q8C1B7	0.949893	0.848472	0.835429	0.706543	0.587121	0.722829	1.0669	0.990686	0.975925	0.877931	0.672164	1.01117	0.0626607	0.0740982	0.0488265	0.765623	1.15177	0.664738	0.0213408	0.0438913	0.00270477
P57759	0.950814	0.798557	0.887541	0.764528	0.757189	1.06803	1.07467	1.05399	1.28437	0.87897	0.863248	1.13768	0.0764895	0.177383	0.127461	0.982113	1.29433	0.758781	0.894708	0.0393787	0.0951563
Q9CQV6	0.952119	0.831291	0.791633	1.35777	1.18103	1.38546	0.633145	1.00171	0.989088	0.858347	1.30809	0.874649	0.0835944	0.110901	0.209244	1.52396	1.01899	1.49556	0.00496301	0.906324	0.0338539
Q99LB6	0.952586	0.786565	0.834544	0.793242	0.760312	0.88007	0.92101	0.866459	0.986746	0.857899	0.811208	0.924739	0.0854388	0.0618676	0.0602302	0.945576	1.07791	0.87723	0.48604	0.330196	0.0850294
O08547	0.954042	0.819113	0.8904	0.886265	0.813336	0.781737	0.896005	0.914439	0.802584	0.887851	0.827112	0.871009	0.0675005	0.0536084	0.0599709	0.931589	0.981031	0.949602	0.289312	0.762823	0.398071
O08528	0.954346	1.38873	1.4451	1.0225	1.12557	0.804429	1.1463	1.18827	1.10405	1.26273	0.984168	1.14621	0.268549	0.163968	0.0421129	0.779399	0.907724	0.85863	0.199958	0.499053	0.172684
P43406	0.95451	0.617758	0.6436	0.3716	0.505735	0.476007	0.925019	0.635773	0.678163	0.738623	0.451114	0.746318	0.18741	0.0704472	0.156204	0.61075	1.01042	0.604453	0.0676832	0.959052	0.0405814
Q6NTA4	0.961047	0.939454	0.932983	0.939462	0.935236	0.937919	1.01819	0.764003	0.959815	0.944495	0.937539	0.914002	0.0146952	0.00213818	0.133142	0.992636	0.967716	1.02575	0.462732	0.713494	0.774764
Q925I1	0.964499	1.15771	0.998052	0.962598	0.924475	0.887102	1.05035	1.15381	0.995074	1.04009	0.924725	1.06641	0.103236	0.0377484	0.0805765	0.889085	1.02531	0.867138	0.143247	0.745269	0.0509554
P42567	0.965435	0.820002	0.814464	0.714165	0.633965	0.623526	0.596051	0.80547	0.652275	0.866634	0.657218	0.684599	0.0856093	0.0495924	0.108387	0.758358	0.789952	0.960005	0.0214631	0.0845266	0.711043
Q6PDL0	0.968136	0.785556	1.29265	0.751619	0.736532	0.844874	1.17259	1.16398	1.25445	1.01545	0.777675	1.19701	0.256835	0.0586828	0.0499342	0.765845	1.1788	0.649681	0.193043	0.295681	0.000706167
Q9CQR4	0.970807	1.50538	1.60598	0.888154	1.09744	0.926675	1.20205	1.01629	1.09824	1.36072	0.970758	1.10553	0.341404	0.111391	0.0930967	0.713413	0.812454	0.878096	0.133152	0.279737	0.183134
Q8VCW8	0.971575	0.9302	0.927255	0.458841	0.680536	0.450819	0.713781	0.751104	0.650878	0.94301	0.530065	0.705254	0.024782	0.130373	0.0506538	0.562099	0.747876	0.751594	0.0057318	0.0018698	0.095869
P51859	0.972082	1.17295	1.24847	0.978093	1.08474	1.06706	0.996817	1.11574	0.972663	1.13117	1.0433	1.02841	0.142852	0.0571564	0.0765925	0.922319	0.909155	1.01448	0.378577	0.333832	0.800612
Q61081	0.972152	0.759621	0.785842	0.750021	0.63492	0.754277	0.945001	0.832405	0.948051	0.839205	0.713072	0.908486	0.11588	0.0677157	0.0659057	0.8497	1.08255	0.784902	0.178906	0.418942	0.0231283
O09044	0.972268	0.909908	0.902436	1.38263	1.07577	1.23124	0.965938	1.17323	1.21696	0.928204	1.22988	1.11871	0.038343	0.153432	0.134098	1.32501	1.20524	1.09938	0.0298224	0.0771722	0.398183
P26040	0.973712	0.689796	0.860211	1.69442	1.57424	1.65957	1.32143	1.15743	1.36629	0.84124	1.64274	1.28172	0.142906	0.0618335	0.10995	1.95277	1.5236	1.28167	0.000874928	0.0133568	0.00772178
Q8VH51	0.974611	0.87066	0.91036	1.28047	1.14625	1.18221	0.945407	1.02613	0.91765	0.918544	1.20298	0.963064	0.0524566	0.0694783	0.0563563	1.30966	1.04847	1.24911	0.00480617	0.373234	0.00969806
Q8R3B1	0.974961	0.896719	1.03899	0.691518	0.87884	0.823417	1.05772	0.896374	0.865448	0.970222	0.797925	0.939849	0.0712517	0.0962279	0.103247	0.822415	0.968694	0.848993	0.0673121	0.69649	0.156527
P97351	0.975119	0.977833	0.912534	1.38285	1.00523	1.34681	1.5433	1.3927	1.38577	0.955162	1.24496	1.44059	0.0369419	0.208396	0.0890185	1.3034	1.50821	0.864204	0.0766832	0.000951127	0.209181
Q6ZQ38	0.975647	0.992675	1.057	0.963662	1.01655	1.07119	1.18904	1.02822	1.09228	1.00844	1.01713	1.10318	0.0429082	0.0537647	0.0809632	1.00862	1.09395	0.921999	0.83746	0.1478	0.199922
Q9DBG3	0.978299	0.876141	0.857784	0.891167	0.952831	0.949256	0.9417	0.967439	0.926946	0.904075	0.931085	0.945362	0.0649323	0.0346158	0.0204932	1.02988	1.04567	0.984898	0.559477	0.352867	0.571988
Q8BHN3	0.981051	0.816274	0.786463	0.855554	0.858404	0.897086	1.21032	0.953698	1.12498	0.861263	0.870348	1.09633	0.104805	0.0231997	0.130689	1.01055	1.27294	0.793872	0.890544	0.0719468	0.0420145
P26043	0.981571	1.59123	1.22804	0.923284	1.04303	1.0924	0.702712	0.860154	0.736943	1.26694	1.01957	0.766603	0.306684	0.0869661	0.0828056	0.804749	0.60508	1.32999	0.250093	0.0525469	0.0217948
Q3TCN2	0.984356	0.701358	0.771167	0.557325	0.656747	0.795255	0.683397	0.634208	0.765713	0.81896	0.669776	0.694439	0.147428	0.119499	0.0664443	0.817836	0.847952	0.964484	0.244976	0.253168	0.770323
P62281	0.98457	1.02015	1.21885	1.6804	1.57947	1.63382	1.73202	1.74711	1.75723	1.07452	1.63123	1.74545	0.126253	0.0505176	0.0126873	1.5181	1.6244	0.93456	0.00208866	0.000789121	0.0191321
O88685	0.984917	0.828593	1.03277	0.887209	0.992411	0.937465	0.955082	0.995467	0.976789	0.94876	0.939028	0.975779	0.106782	0.0526183	0.0202114	0.989743	1.02848	0.962337	0.894248	0.688932	0.32191
Q9WU28	0.986264	1.04466	1.06386	1.30457	1.72445	1.61271	1.17814	1.1215	1.33533	1.0316	1.54724	1.21166	0.0404142	0.217463	0.110785	1.49986	1.17455	1.27696	0.015631	0.057299	0.0758551
P42225	0.986513	0.793981	0.839804	1.61538	1.56053	1.41247	0.837745	1.04205	1.18124	0.873433	1.52946	1.02034	0.100575	0.104968	0.172775	1.75109	1.1682	1.49897	0.00144611	0.272028	0.0120439
P21956	0.987171	0.679205	0.914272	0.448881	0.696004	0.572618	0.705474	0.550507	0.605644	0.860216	0.572501	0.620542	0.160942	0.123562	0.0785504	0.665532	0.721379	0.922583	0.0699894	0.0813135	0.600213
Q8R081	0.988394	0.954456	1.03173	1.22022	1.12247	1.23646	1.15506	1.16245	1.0865	0.991527	1.19305	1.13467	0.0387326	0.0616587	0.0418762	1.20325	1.14437	1.05145	0.00868839	0.0121911	0.246408
Q9JHU4	0.988969	0.993548	1.01748	0.947315	0.976451	0.941518	1.09538	1.04611	1.0737	0.999999	0.955094	1.07173	0.0153117	0.0187211	0.0246929	0.955095	1.07173	0.891171	0.0324067	0.0128875	0.00285823
O55143	0.989491	1.06808	1.02648	1.16812	1.16299	1.09493	1.51868	1.49902	1.53128	1.02802	1.14201	1.51632	0.0393151	0.0408587	0.0162563	1.11089	1.475	0.753145	0.0253009	3.77719e-05	0.000123182
P61082	0.989783	1.30932	1.38839	1.44246	1.38046	1.28883	1.2887	1.35388	1.20647	1.22916	1.37058	1.28302	0.211047	0.0772886	0.073869	1.11505	1.04381	1.06825	0.337041	0.69799	0.228991
Q99J77	0.990258	1.07628	0.747097	0.873984	0.910721	1.11021	0.717861	0.696352	0.87408	0.937877	0.964972	0.762765	0.170727	0.127115	0.0970003	1.02889	0.813289	1.2651	0.836288	0.197318	0.0936545
Q91VS7	0.991952	1.49898	0.94351	1.15405	0.928134	1.06692	0.860885	1.15895	0.693919	1.14481	1.0497	0.904584	0.307669	0.113941	0.235573	0.916923	0.790159	1.16043	0.641981	0.343382	0.391177
Q9JIF7	0.996098	0.863507	0.903685	1.0103	0.919219	0.934752	1.32476	1.10582	1.15466	0.921097	0.954757	1.19508	0.0679889	0.0487243	0.114928	1.03654	1.29746	0.798904	0.524187	0.0237157	0.028981
P97855	0.996219	0.811042	0.782421	0.934888	0.942269	1.00193	1.32009	0.953402	1.12722	0.863228	0.959694	1.13357	0.11606	0.0367593	0.183426	1.11175	1.31318	0.846611	0.241849	0.0971896	0.182712
Q9EQ80	0.996277	0.962811	0.984642	0.829275	0.834732	0.853781	1.13472	0.851835	0.946145	0.981243	0.839263	0.977565	0.01699	0.012866	0.144034	0.855305	0.996252	0.858523	0.000322133	0.96707	0.172955
Q9D0R2	0.997514	1.09217	1.10816	0.981986	1.04033	1.03676	1.42514	1.13906	1.34707	1.06595	1.01969	1.30376	0.059802	0.0327019	0.147873	0.956605	1.2231	0.782117	0.304995	0.0611785	0.0314114
Q9DBF1	0.998671	1.00914	0.84347	0.39382	0.621372	0.475146	0.771099	0.770295	0.766464	0.950428	0.496779	0.769286	0.092776	0.115308	0.00247659	0.52269	0.80941	0.645767	0.00604964	0.027771	0.0149456
P70670	0.998991	1.23128	1.4752	1.11779	1.16492	1.03116	1.4729	1.40101	1.58313	1.23516	1.10462	1.48568	0.238129	0.0678438	0.0917332	0.894317	1.20282	0.743514	0.412835	0.164282	0.00443711
Q99PM3	0.999024	0.658235	0.874141	0.908021	0.944949	0.887869	0.633581	0.654818	0.735739	0.8438	0.913613	0.674713	0.172408	0.0289479	0.0539066	1.08274	0.799612	1.35408	0.527196	0.180273	0.00249399
P27546	0.999248	1.02881	1.05418	0.548285	0.537835	0.614678	1.21499	0.970567	0.972608	1.02741	0.566933	1.05272	0.0274937	0.0416773	0.140531	0.551806	1.02463	0.53854	8.97873e-05	0.774781	0.00456349
P25444	1.00075	0.985304	1.05339	1.23628	1.5638	1.2324	1.85274	1.50118	1.68805	1.01315	1.34416	1.68066	0.0356945	0.190224	0.1759	1.32672	1.65885	0.799782	0.0414606	0.00298843	0.087688
Q8JZQ9	1.00107	1.00631	1.14828	1.33719	1.31428	1.31577	1.46405	1.34404	1.35436	1.05188	1.32241	1.38748	0.0835197	0.0128207	0.0665119	1.25719	1.31905	0.953102	0.00517246	0.00552731	0.171469
Q9CY64	1.00478	0.941667	0.979312	0.800401	0.905654	0.9273	1.04296	1.11301	1.09354	0.975253	0.877785	1.08317	0.0317522	0.0678849	0.0361558	0.900058	1.11065	0.810385	0.0873905	0.0177737	0.00984263
Q63844	1.00604	0.847029	0.980147	1.2091	0.962112	1.09104	0.861416	0.83835	0.904973	0.944406	1.08742	0.868246	0.0853191	0.123536	0.0338329	1.15143	0.919357	1.25243	0.174311	0.224018	0.0413981
P32921	1.00621	1.08584	1.17192	0.828103	0.988456	0.854376	0.958374	0.96275	1.02058	1.08799	0.890312	0.98057	0.0828768	0.0860046	0.0347231	0.81831	0.901269	0.907954	0.0456224	0.107161	0.167169
P30999	1.00788	1.09005	1.19677	0.877791	0.990509	0.936875	1.12594	1.10074	1.03418	1.09823	0.935058	1.08695	0.0947088	0.0563809	0.0474055	0.851421	0.989731	0.860255	0.0623616	0.862645	0.0233422
Q61335	1.00929	1.06677	1.06544	0.852949	0.841699	0.696439	0.656398	0.88374	0.674512	1.04717	0.797029	0.738216	0.0328105	0.087295	0.126352	0.76113	0.704967	1.07967	0.00969236	0.0148634	0.543413
Q6ZQI3	1.01011	1.24484	1.15635	1.48546	0.998683	1.37144	1.44234	1.27658	1.39874	1.1371	1.2852	1.37255	0.118546	0.254593	0.0859308	1.13024	1.20707	0.936353	0.412721	0.0495457	0.603428
P70699	1.01035	0.811304	0.644198	0.541178	0.976667	0.812493	0.659923	0.745091	0.831346	0.821951	0.776779	0.745453	0.183309	0.21993	0.0857123	0.945043	0.906931	1.04202	0.798172	0.548356	0.829472
Q6PHQ9	1.01226	1.24821	1.05933	0.910043	0.993218	0.638717	0.870112	1.39707	1.01759	1.1066	0.847326	1.09492	0.124874	0.185385	0.271858	0.765701	0.989446	0.773868	0.114914	0.949335	0.26243
Q9CQ22	1.01459	0.674055	0.675533	0.735533	0.622397	0.820389	0.724794	0.910874	0.764718	0.788059	0.726106	0.800129	0.196182	0.0993323	0.0979632	0.921385	1.01532	0.907487	0.651102	0.928636	0.410103
Q9D898	1.01552	1.16392	1.13763	1.02479	0.93622	1.20204	1.08592	1.09351	1.11964	1.10569	1.05435	1.09969	0.0791869	0.135352	0.0176866	0.953564	0.994571	0.958769	0.600956	0.904221	0.59589
Q8QZZ8	1.01557	1.02899	1.19384	1.99899	1.45133	1.89292	1.31361	1.19047	1.47806	1.07947	1.78108	1.32738	0.0992737	0.290455	0.144289	1.64996	1.22966	1.3418	0.0166918	0.0703177	0.0725273
Q61550	1.01577	0.746795	0.905996	0.887901	0.90559	0.891711	0.86693	0.789537	0.676651	0.88952	0.895067	0.777706	0.135243	0.00931	0.0956896	1.00624	0.874298	1.15091	0.946901	0.30732	0.10199
P28076	1.01598	1.04624	1.06594	0.960131	1.2363	1.16378	0.465724	0.662775	0.711058	1.04272	1.12007	0.613186	0.025166	0.143177	0.129967	1.07418	0.588064	1.82664	0.408903	0.00492828	0.0104948
O55222	1.01661	1.04063	1.00561	1.15966	1.28291	1.15047	0.947071	1.03227	1.05484	1.02095	1.19768	1.0114	0.0179098	0.0739567	0.056838	1.1731	0.990641	1.18419	0.0158284	0.794987	0.0258358
Q61316	1.01699	1.05674	1.08222	1.09233	1.07561	1.12401	1.34295	1.25375	1.2763	1.05198	1.09732	1.291	0.0328759	0.024582	0.0463806	1.04309	1.22721	0.849974	0.128325	0.00188978	0.00307724
O55135	1.01798	0.758926	1.04226	1.25703	1.20225	1.43736	1.50791	1.31947	1.46121	0.939723	1.29888	1.42953	0.157045	0.123013	0.0981353	1.38219	1.52122	0.908607	0.0355826	0.0101743	0.223808
P26231	1.02283	1.05699	1.17348	0.866899	0.879233	0.914165	1.14372	1.01745	0.999357	1.08443	0.886766	1.05351	0.0789864	0.0245165	0.0786475	0.817725	0.971485	0.841727	0.0143805	0.655963	0.0247665
Q80WJ7	1.02698	1.10294	1.24974	1.1324	1.41615	1.09628	1.32651	1.30712	1.12806	1.12655	1.21494	1.2539	0.11324	0.175185	0.10941	1.07846	1.11304	0.968934	0.503684	0.233884	0.760305
Q921J2	1.02737	0.807486	0.684356	0.688986	0.788721	0.591539	0.679555	0.674564	0.88047	0.839736	0.689749	0.744863	0.173765	0.0985934	0.117466	0.821388	0.88702	0.926008	0.263355	0.477149	0.567365
Q9D1Q6	1.03191	0.754706	0.811038	0.883678	0.847264	0.905125	1.07979	1.0577	1.08817	0.865883	0.878689	1.07522	0.146513	0.0292511	0.0157428	1.01479	1.24176	0.81722	0.889167	0.0696503	0.000511257
O35114	1.0323	0.746348	0.972224	0.783551	0.780007	0.825188	1.2345	1.19172	0.996556	0.916958	0.796249	1.14093	0.150775	0.0251248	0.126845	0.86836	1.24425	0.697896	0.243183	0.120332	0.00990471
Q7TQI3	1.03493	0.963507	0.998331	0.982435	1.04815	1.06375	1.15873	0.922456	1.11449	0.998924	1.03144	1.06523	0.0357172	0.043154	0.125605	1.03256	1.06637	0.968287	0.371536	0.428836	0.682298
Q03958	1.03572	0.913906	1.08743	1.31	1.34365	1.31269	1.33978	1.38435	1.59002	1.01235	1.32211	1.43805	0.0890916	0.0187039	0.133488	1.30598	1.4205	0.919379	0.00414515	0.0100741	0.210533
Q69ZN7	1.03946	0.939407	0.886339	0.7419	0.805497	0.791359	1.16184	1.08676	1.02423	0.955069	0.779586	1.09094	0.0777522	0.0333934	0.0688972	0.816261	1.14227	0.714598	0.0229231	0.0861646	0.00214159
Q791V5	1.04168	1.26372	1.30127	0.76235	0.808867	0.685403	0.846068	0.819104	0.734454	1.20222	0.752206	0.799876	0.140297	0.0623543	0.0582384	0.625682	0.665332	0.940404	0.00709634	0.010125	0.387995
Q9D2R0	1.04843	0.996975	0.95855	0.559554	0.543786	0.455395	0.767605	0.824112	0.720524	1.00132	0.519578	0.770747	0.0450967	0.0561408	0.0518654	0.518894	0.769733	0.674123	0.00031694	0.00436545	0.00470615
P62869	1.04947	1.14665	1.02183	1.06789	1.0226	1.10494	1.04639	1.18119	1.11106	1.07265	1.06514	1.11288	0.0655612	0.04124	0.0674206	0.992998	1.0375	0.957104	0.874774	0.499877	0.354517
Q9Z2Y8	1.04955	1.34068	0.909855	0.99218	0.936609	1.07178	1.01531	1.12202	0.910976	1.10003	1.00019	1.0161	0.219802	0.0679428	0.105523	0.909243	0.923706	0.984343	0.494088	0.583145	0.836967
P21278	1.05015	1.088	0.985931	0.731307	0.81789	0.664046	0.903384	0.913054	0.716977	1.04136	0.737748	0.844472	0.0515978	0.0771244	0.11052	0.708447	0.810932	0.87362	0.004781	0.0490153	0.242088
Q8BG32	1.05087	1.30945	1.36653	1.40229	1.45297	1.4463	1.78428	1.6854	1.65726	1.24228	1.43386	1.70898	0.168207	0.0275395	0.0667153	1.15421	1.37568	0.839014	0.123417	0.0110995	0.00272716
O88543	1.05111	1.17692	1.06753	0.885556	1.13812	0.919032	1.0058	0.981294	0.969077	1.09852	0.980901	0.985391	0.0683893	0.137176	0.0187018	0.892929	0.897016	0.995444	0.254556	0.0506568	0.957901
P62996	1.05239	1.23985	0.955558	1.31388	1.13676	1.27871	1.74443	1.17091	1.74073	1.0826	1.24312	1.55202	0.144535	0.0937694	0.330063	1.14827	1.43361	0.800965	0.181887	0.0870168	0.193929
O55029	1.05296	0.879913	0.929275	1.03594	0.955927	1.01296	1.29642	1.14661	1.28539	0.954051	1.00161	1.24281	0.0891464	0.0411981	0.0834906	1.04985	1.30266	0.805927	0.448774	0.0149158	0.0109298
Q8BH58	1.05665	1.09812	1.10444	1.03295	1.12578	0.984876	0.851568	0.879504	0.74953	1.0864	1.04787	0.826867	0.0259606	0.0716288	0.0684173	0.96453	0.761105	1.26728	0.430462	0.00356071	0.0180788
O89023	1.05792	0.97417	1.13801	0.745122	0.933304	1.09799	1.26445	1.32995	1.10317	1.0567	0.925472	1.23253	0.0819245	0.176564	0.116714	0.875815	1.16639	0.750874	0.307775	0.0995683	0.0658629
Q9Z0P4	1.06227	0.836423	0.909855	0.524155	0.610489	0.532825	0.51933	0.495592	0.466564	0.936184	0.555823	0.493829	0.115204	0.0475405	0.0264273	0.593712	0.527491	1.12554	0.00614437	0.00291942	0.119601
P24668	1.06325	1.09709	1.01257	1.53771	1.01038	1.4608	1.28866	1.37722	1.34119	1.05764	1.3363	1.33569	0.0425414	0.284859	0.044535	1.26347	1.2629	1.00045	0.169092	0.00144368	0.997266
Q9QUI0	1.06388	1.5552	0.889688	1.26346	1.08396	1.42511	1.04973	0.732609	0.849816	1.16959	1.25751	0.877386	0.345118	0.170656	0.160349	1.07517	0.750165	1.43324	0.712648	0.254303	0.0482384
Q99JR1	1.0657	1.05473	0.846155	1.43402	1.01377	1.2262	1.05902	1.0375	0.964512	0.988863	1.22466	1.02034	0.12371	0.210127	0.0495343	1.23846	1.03184	1.20024	0.169256	0.703362	0.176507
Q3UDE2	1.06576	0.902336	0.94945	0.70668	0.837758	0.771785	0.95635	0.8733	0.826401	0.972516	0.772074	0.88535	0.0841198	0.0655399	0.0658075	0.793893	0.910371	0.872055	0.0312086	0.230367	0.102205
Q8BTY1	1.0685	1.26275	1.36966	0.558613	1.00008	0.947249	1.4985	1.01098	1.48211	1.23364	0.835314	1.33053	0.152675	0.241082	0.276858	0.677115	1.07854	0.627805	0.0729443	0.62365	0.0796868
P47758	1.06967	1.40093	1.23231	1.13074	0.965008	0.823261	1.10344	1.09841	1.15235	1.23431	0.973004	1.11807	0.165639	0.153896	0.029792	0.788301	0.905828	0.870254	0.115887	0.297651	0.184219
Q9R233	1.07053	0.992841	1.28624	1.27758	1.36183	1.07203	0.54683	0.838922	0.614441	1.11654	1.23715	0.666731	0.152016	0.149071	0.152906	1.10802	0.59714	1.85554	0.382071	0.022489	0.00983252
Q9CZM2	1.07135	1.01276	1.25843	1.58411	1.709	1.23362	1.84171	1.84895	1.56151	1.11418	1.50891	1.75073	0.128312	0.246452	0.163902	1.35428	1.57131	0.861877	0.0696448	0.00610071	0.22996
Q61830	1.07233	0.922727	0.794589	0.863456	1.14465	1.01827	1.18279	2.02471	1.39133	0.929883	1.00879	1.53294	0.13901	0.140834	0.438462	1.08486	1.64853	0.658074	0.527769	0.0856465	0.119983
Q9Z1Z0	1.07351	1.31133	1.35216	1.06465	1.17994	1.14827	1.47528	1.41378	1.35506	1.24567	1.13095	1.41471	0.150487	0.0595647	0.0601138	0.907908	1.1357	0.799425	0.286877	0.145091	0.00437366
P61211	1.07728	0.901976	0.866095	1.15912	1.09395	0.956398	1.14721	0.928519	1.20476	0.948451	1.06982	1.0935	0.113004	0.10349	0.145743	1.12797	1.15293	0.978348	0.242008	0.244783	0.829798
P70372	1.07766	1.06266	1.20381	1.49006	1.30154	1.52771	1.34593	1.33217	1.49221	1.11471	1.43977	1.3901	0.0775314	0.12118	0.0886932	1.29161	1.24705	1.03573	0.0173398	0.0154875	0.59739
Q61187	1.07788	1.13301	1.17093	1.15021	0.987884	1.17722	1.36149	1.13814	1.28065	1.12727	1.1051	1.2601	0.0467913	0.102409	0.113086	0.980332	1.11782	0.877	0.750209	0.133321	0.153288
Q60710	1.08134	0.938567	0.75673	1.20903	1.03244	1.25374	0.993914	1.18567	1.12343	0.925545	1.16507	1.10101	0.162695	0.117013	0.0978255	1.25879	1.18958	1.05819	0.10721	0.184665	0.507195
Q9CR16	1.0816	0.827917	0.89336	1.0047	1.05592	1.10734	1.14137	0.924756	1.04731	0.934292	1.05599	1.03781	0.131702	0.0513205	0.10862	1.13025	1.1108	1.01751	0.210164	0.352845	0.806225
Q811D0	1.08311	0.765831	0.629465	0.667789	0.713159	0.651785	0.758004	0.923523	0.685097	0.826137	0.677577	0.788875	0.23276	0.0318362	0.122174	0.820176	0.954896	0.858916	0.334913	0.81814	0.201504
Q8C129	1.0836	0.99836	1.00677	1.35773	1.25293	1.34453	0.588107	0.965915	0.631673	1.02958	1.3184	0.728565	0.0469728	0.05708	0.206702	1.28052	0.707635	1.80958	0.00248767	0.069721	0.00887803
P49312	1.08489	0.839261	0.952639	1.61851	1.8415	1.79855	1.63213	1.70485	1.67365	0.958931	1.75286	1.67021	0.122936	0.11831	0.0364818	1.82793	1.74174	1.04948	0.00128702	0.0006562	0.311953
P80317	1.08546	1.07059	1.14662	1.54929	1.61267	1.4384	1.80015	1.47433	1.77916	1.10089	1.53345	1.68455	0.0402956	0.0882068	0.182355	1.39291	1.53016	0.910304	0.00151134	0.00564285	0.265966
P68037	1.08572	1.03796	0.830436	1.47132	1.38367	1.71754	1.20966	1.44965	1.47017	0.984704	1.52418	1.3765	0.135718	0.173099	0.144843	1.54785	1.39788	1.10729	0.0131789	0.0268098	0.320406
Q91V41	1.08662	1.05207	1.04261	1.10254	0.995092	1.18334	1.11232	1.17714	1.13004	1.06043	1.09366	1.13983	0.0231669	0.0944375	0.0334991	1.03133	1.07487	0.959491	0.585794	0.0278757	0.469496
P80316	1.09076	1.02424	1.21081	1.46527	1.39211	1.41113	1.58322	1.483	1.56187	1.1086	1.42283	1.5427	0.0945577	0.0379577	0.052791	1.28345	1.39157	0.922303	0.00591896	0.00226059	0.033122
Q9QYC0	1.09096	0.985169	1.23441	0.958312	0.85057	0.906992	0.770783	0.699295	0.714838	1.10351	0.905292	0.728305	0.125093	0.0538909	0.0375988	0.820372	0.659987	1.24301	0.0653114	0.00762266	0.00955292
Q8VE70	1.09311	1.00634	1.16289	2.14477	1.743	2.3501	1.50719	1.49904	1.53423	1.08744	2.07929	1.51349	0.0784256	0.308803	0.018418	1.91209	1.39178	1.37384	0.00572261	0.000788531	0.0339257
Q9D6Z1	1.09602	0.989689	1.28134	1.36583	1.3909	1.18763	1.32315	1.3641	1.12398	1.12235	1.31479	1.27041	0.147599	0.110829	0.128452	1.17146	1.13192	1.03493	0.145257	0.260166	0.674013
P70195	1.09739	0.996419	1.00632	1.26093	1.30912	1.29885	1.15906	0.861383	1.20218	1.03338	1.28964	1.07421	0.0556614	0.0253844	0.185568	1.24798	1.03951	1.20055	0.00191621	0.733568	0.117155
Q9D0F3	1.09781	1.09555	1.03509	0.96192	0.781641	0.852507	1.2799	1.2038	1.27016	1.07615	0.865356	1.25129	0.035575	0.0908241	0.0414122	0.80412	1.16274	0.691571	0.0200673	0.00513537	0.00258682
Q9QZ88	1.09786	1.03095	0.893365	0.979372	0.99543	1.16363	1.23917	1.07446	1.16617	1.00739	1.04614	1.15993	0.104263	0.102062	0.0825298	1.03847	1.15142	0.901901	0.669394	0.117867	0.207616
Q9CPY7	1.09963	0.918488	1.06892	0.587687	0.819391	0.68348	1.55133	0.920108	1.32038	1.02901	0.696853	1.26394	0.0969408	0.116429	0.319374	0.677205	1.2283	0.551335	0.0191466	0.289766	0.0445879
O08529	1.10093	1.17787	1.14326	0.907245	1.16372	1.06912	1.35927	1.44772	1.33708	1.14069	1.04669	1.38136	0.0385355	0.129699	0.0585309	0.9176	1.21099	0.75773	0.295232	0.00400726	0.0151779
O08600	1.10416	1.50647	1.34704	0.661176	0.684631	0.67913	0.805245	1.08375	0.758715	1.31922	0.674979	0.882568	0.20259	0.0122657	0.175771	0.511649	0.669006	0.764789	0.00533543	0.0478376	0.110864
P61079	1.10548	1.56525	1.2725	2.09018	2.30995	2.004	1.88459	1.71398	2.01306	1.31441	2.13471	1.87054	0.232732	0.157762	0.150037	1.62408	1.42311	1.14123	0.00721434	0.0253827	0.103465
Q9R0N0	1.10635	0.886493	0.956954	0.850961	1.07622	0.958379	1.13299	0.998831	1.02159	0.983265	0.961853	1.05114	0.112265	0.11267	0.0717926	0.978223	1.06903	0.915061	0.827072	0.427514	0.311476
O70404	1.10877	0.824921	0.716445	1.45997	1.39407	1.29798	1.16802	1.36821	1.36116	0.883379	1.384	1.29913	0.20259	0.0814637	0.113603	1.56672	1.47064	1.06533	0.0165237	0.03621	0.352319
P61087	1.10918	1.22654	1.29245	1.38565	1.22993	1.35516	1.55856	1.40217	1.41402	1.20939	1.32358	1.45825	0.0928303	0.0825252	0.087073	1.09442	1.20577	0.90765	0.186518	0.0276148	0.123762
O54984	1.10967	1.12533	1.10967	1.07043	1.0493	1.19527	1.30394	1.14232	1.09885	1.11489	1.105	1.18171	0.00903953	0.0788872	0.108066	0.991127	1.05993	0.935087	0.839714	0.34602	0.376909
Q99KB8	1.11123	1.28534	1.17127	0.721046	0.666973	0.539153	0.895252	0.865002	0.980874	1.18928	0.642391	0.913709	0.0884416	0.0934047	0.0601007	0.54015	0.768286	0.703058	0.00181183	0.0111283	0.0133593
P54823	1.11156	1.1975	1.41431	1.9532	1.66684	1.92279	1.7203	1.57375	1.52435	1.24112	1.84761	1.60613	0.156021	0.157289	0.101905	1.48866	1.2941	1.15035	0.00902709	0.0274644	0.0894462
Q91VA7	1.11654	1.73131	1.85092	0.855694	0.96038	0.659002	0.90707	0.962555	0.797106	1.56625	0.825026	0.88891	0.394032	0.153012	0.0842062	0.526751	0.567539	0.928132	0.0385053	0.0436054	0.560789
P51660	1.12052	1.11565	1.18354	0.75362	0.884149	0.736087	0.780046	0.912138	0.809269	1.1399	0.791285	0.833817	0.0378733	0.0808989	0.0693833	0.694169	0.731481	0.948991	0.00249785	0.00257221	0.527455
Q99KF1	1.12159	1.03458	1.00517	1.17676	1.01778	1.19996	1.37151	1.10187	1.25305	1.05378	1.1315	1.24214	0.0605361	0.0991657	0.135151	1.07375	1.17875	0.910924	0.311057	0.0923296	0.316707
A2AEH9	1.12197	0.889494	0.855424	1.0314	0.873224	1.44723	0.749509	0.849362	1.14387	0.955631	1.11728	0.914247	0.145061	0.296481	0.205031	1.16916	0.956695	1.22208	0.444055	0.78951	0.384507
O70493	1.12287	1.36256	1.25599	1.85459	2.33821	2.2163	2.30965	2.59998	2.04489	1.24714	2.13637	2.31817	0.120092	0.251523	0.27764	1.71301	1.85879	0.921574	0.00523858	0.0035833	0.447909
P63158	1.12472	1.33154	1.33009	2.00023	1.5597	1.91994	1.34288	1.359	1.62041	1.26212	1.82662	1.44076	0.118991	0.23462	0.155784	1.44727	1.14154	1.26782	0.0205336	0.18961	0.0765635
Q9EQH3	1.12484	1.24844	1.29798	1.36269	1.28204	1.29989	1.4714	1.50937	1.36573	1.22375	1.31487	1.44883	0.0891732	0.042359	0.0744334	1.07446	1.18392	0.90754	0.18514	0.0284036	0.053581
P46978	1.12803	1.02104	1.06195	1.05587	0.91781	0.949451	1.38631	1.35897	1.30288	1.07034	0.974376	1.34939	0.0539848	0.0723243	0.0425326	0.910342	1.26071	0.722087	0.139322	0.00215433	0.00149975
Q99MD9	1.13058	0.935897	1.37993	1.08951	0.791886	1.44019	1.57366	1.05634	1.08238	1.1488	1.1072	1.23746	0.222578	0.324513	0.291449	0.96378	1.07717	0.894735	0.863592	0.696934	0.63226
Q91VC3	1.1308	1.28714	1.36411	2.25546	1.86531	2.0595	1.94421	1.69935	1.94701	1.26069	2.06009	1.86352	0.118883	0.195075	0.142186	1.6341	1.47818	1.10548	0.00374111	0.00488476	0.231231
Q9EQH2	1.13266	0.974692	1.02911	1.08282	1.15556	0.945543	0.873836	0.95939	0.898161	1.04549	1.06131	0.910462	0.080248	0.106646	0.0440837	1.01513	0.870849	1.16568	0.84739	0.0630159	0.0862926
Q9DAR7	1.14051	1.00024	1.09536	0.90355	0.911131	1.01289	0.695482	0.628687	0.666996	1.0787	0.942524	0.663722	0.0716005	0.0610579	0.0335176	0.873757	0.615296	1.42006	0.0662987	0.000811571	0.00227257
P56546	1.14054	1.26496	1.12827	1.34918	0.941578	1.27577	1.16869	1.05888	1.10488	1.17792	1.18885	1.11082	0.0756264	0.217263	0.0551407	1.00927	0.94303	1.07024	0.938415	0.282128	0.57907
P62835	1.14185	1.02031	1.01138	1.16967	1.206	1.24296	1.01116	1.10731	1.17502	1.05785	1.20621	1.09783	0.0728865	0.0366428	0.0823385	1.14025	1.03779	1.09873	0.0345126	0.56304	0.105664
P84104	1.1439	0.894428	1.23532	1.9684	1.96493	2.00938	1.20414	1.37804	1.21796	1.09121	1.9809	1.26671	0.176445	0.0247248	0.0966619	1.81532	1.16083	1.56381	0.000982978	0.205337	0.000243291
Q8CIE6	1.14497	1.04831	1.12066	1.20685	1.04626	1.14962	1.61552	1.35129	1.49745	1.10465	1.13424	1.48809	0.0502812	0.0813892	0.132361	1.02679	1.34711	0.762215	0.620535	0.00937411	0.0168985
Q9D8C4	1.14535	0.926921	0.658207	1.22266	1.23403	1.21066	0.707645	0.645196	0.892865	0.910161	1.22245	0.748569	0.244006	0.0116882	0.128806	1.34311	0.822458	1.63305	0.091197	0.367769	0.00315806
Q8BJY1	1.14657	1.19114	1.15672	1.28172	1.12735	1.31388	1.39466	1.20343	1.29639	1.16481	1.24098	1.29816	0.0233596	0.0997124	0.0956255	1.06539	1.11448	0.955956	0.26712	0.0788305	0.513113
Q9D6U8	1.14743	1.66505	2.02265	1.37423	1.35658	1.36263	1.88013	1.57085	1.62987	1.61171	1.36448	1.69362	0.440043	0.00897193	0.164197	0.846603	1.05082	0.80566	0.385682	0.77767	0.0256591
Q99KP6	1.15649	1.05643	1.22159	1.65178	1.54047	1.71276	1.54107	1.46709	1.49153	1.14484	1.635	1.4999	0.0831952	0.0873596	0.0376926	1.42816	1.31014	1.09008	0.0021485	0.00253481	0.0697259
O09161	1.15758	1.44816	1.37454	0.729255	0.670228	0.783472	1.09728	0.945011	0.900274	1.32676	0.727652	0.980857	0.151068	0.0566391	0.103281	0.548442	0.739287	0.741853	0.00300524	0.0306756	0.0204172
O35226	1.15776	0.72217	0.749926	1.1977	1.0739	1.20491	1.05233	1.19322	1.0639	0.876618	1.15884	1.10315	0.243871	0.0736469	0.0782132	1.32194	1.25842	1.05048	0.127445	0.200276	0.420046
Q8K4Z3	1.16484	1.31799	1.31904	0.654378	0.945053	0.875308	0.792312	0.825725	0.501594	1.26729	0.824913	0.706544	0.0887223	0.151749	0.178276	0.650926	0.557523	1.16753	0.0120724	0.00817621	0.430617
Q9D952	1.16532	0.902086	1.12255	0.635061	0.693289	0.635817	0.751956	0.735148	0.738448	1.06332	0.654722	0.741851	0.141259	0.0334017	0.00890577	0.615735	0.697675	0.882553	0.00818684	0.0170476	0.0120098
Q9DBG6	1.16547	1.12477	1.12079	1.0597	1.03666	1.01672	1.41231	1.36404	1.33764	1.13701	1.03769	1.37133	0.0247272	0.0215073	0.037865	0.912651	1.20608	0.756707	0.00630131	0.000853161	0.000186373
Q9JI75	1.16788	1.47026	1.30913	0.724546	0.878211	0.814774	0.565826	0.771856	0.681466	1.31576	0.805844	0.673049	0.151302	0.0772205	0.103273	0.612456	0.51153	1.1973	0.00651927	0.00370537	0.149044
Q99J56	1.16919	1.03478	0.853853	0.84069	0.762684	0.65203	0.853976	0.628271	0.700924	1.01927	0.751801	0.727724	0.158238	0.0947999	0.115214	0.737585	0.713963	1.03309	0.0659517	0.0613358	0.793711
Q6P1B1	1.16921	1.22789	1.38949	1.13353	1.13766	1.29102	1.18084	1.13187	1.08837	1.26219	1.1874	1.13369	0.114076	0.0897572	0.0462584	0.940747	0.898192	1.04738	0.422603	0.144872	0.409019
Q9CZY3	1.17049	1.656	0.984141	1.37545	1.58779	1.38929	1.24758	1.51152	1.55829	1.27021	1.45084	1.43913	0.346853	0.118798	0.167529	1.14221	1.13299	1.00814	0.441554	0.48982	0.926055
Q6A068	1.17297	0.962769	0.930318	1.20161	0.800185	1.34568	1.11742	1.04448	1.06904	1.02202	1.11583	1.07698	0.13173	0.282687	0.0371121	1.09179	1.05378	1.03607	0.629886	0.524997	0.825017
Q91YS8	1.17463	1.11026	0.964911	0.560367	0.597251	0.641595	0.898209	0.860733	1.01909	1.08327	0.599738	0.926011	0.107435	0.0406707	0.0827591	0.553637	0.854831	0.647657	0.00188157	0.115	0.003592
P70404	1.17503	1.81464	1.8441	0.816148	1.01454	0.663654	1.05308	0.90135	0.919205	1.61126	0.831449	0.957878	0.378067	0.175945	0.0829287	0.516026	0.594492	0.868011	0.0317045	0.0430784	0.323219
P97927	1.17727	1.0439	1.16572	0.660479	0.899393	0.619595	0.664435	0.724106	0.551269	1.12896	0.726489	0.646603	0.0738945	0.151128	0.0877879	0.643502	0.572742	1.12355	0.0143317	0.00189094	0.47285
Q9D819	1.18144	1.10288	1.13121	0.819444	1.02768	0.941211	1.1658	1.22259	1.09356	1.13851	0.929445	1.16065	0.0397824	0.104616	0.0646665	0.81637	1.01945	0.800798	0.0318148	0.640074	0.0311969
O70172	1.18251	0.9922	1.02865	1.0999	1.05949	1.13661	0.932575	1.08382	1.13169	1.06779	1.09867	1.04936	0.101011	0.0385785	0.103934	1.02892	0.982744	1.04699	0.646773	0.836499	0.484078
Q8CE08	1.18312	0.935035	1.18454	1.86942	1.22456	1.80778	1.13744	0.849324	1.03532	1.1009	1.63392	1.00736	0.143643	0.355856	0.146079	1.48417	0.915036	1.62198	0.0738928	0.47331	0.0477702
Q9CPU0	1.18388	1.4187	1.34581	0.926962	1.26298	1.06927	1.39014	1.25212	1.49321	1.31613	1.0864	1.37849	0.120193	0.168663	0.120969	0.825455	1.04738	0.788112	0.127097	0.560873	0.0714068
Q00PI9	1.18413	1.05628	1.17921	1.19259	0.969729	1.1676	1.03121	1.07191	1.00185	1.13987	1.10997	1.03499	0.0724366	0.122094	0.0351821	0.97377	0.907989	1.07245	0.733738	0.0870808	0.364509
Q8VCT3	1.18534	1.01703	1.08567	1.91861	1.36763	1.97438	1.01357	1.47753	1.5847	1.09601	1.75354	1.3586	0.0846328	0.335367	0.30357	1.59993	1.23959	1.2907	0.0301399	0.222447	0.205022
Q9WV54	1.1861	1.03709	1.04833	0.951757	1.06669	1.06628	0.932561	1.4342	1.16596	1.09051	1.02824	1.17758	0.0829785	0.066238	0.251024	0.942901	1.07984	0.873185	0.36718	0.598918	0.375494
Q05793	1.18639	1.2382	1.40472	0.959787	1.07304	0.894954	1.23456	1.22729	1.05154	1.27644	0.975929	1.17113	0.114078	0.090136	0.103635	0.764573	0.9175	0.833322	0.0231679	0.302165	0.069571
P62748	1.1907	1.08277	1.0062	1.48905	1.22939	1.7748	0.814839	0.821982	0.92403	1.09322	1.49775	0.853617	0.0926932	0.272809	0.0610841	1.37003	0.780825	1.75459	0.0718445	0.0201473	0.0162549
P40336	1.19271	1.06955	1.10948	0.857803	1.08344	0.995136	1.16042	1.26164	1.12392	1.12392	0.978794	1.18199	0.0628355	0.113705	0.0713463	0.870879	1.05167	0.828089	0.125118	0.349691	0.0586833
Q99MN1	1.19491	1.04069	1.11622	1.33781	1.05699	1.26851	1.43255	1.32701	1.33974	1.11727	1.2211	1.36643	0.0771175	0.146286	0.0576097	1.09293	1.22301	0.893645	0.337952	0.0109627	0.184628
Q80X90	1.19587	1.05128	1.13505	0.837655	0.982816	0.898747	1.12382	1.06565	1.09249	1.1274	0.906406	1.09399	0.0725956	0.0728831	0.029113	0.803977	0.970363	0.828533	0.0204565	0.500423	0.0143786
P62814	1.19808	0.945872	0.90523	1.5993	1.15376	1.68688	1.38741	1.38333	1.51654	1.01639	1.47998	1.42909	0.158652	0.285887	0.0757564	1.45611	1.40604	1.03561	0.0700055	0.0152756	0.780535
P23780	1.19841	0.876143	0.770503	0.499117	0.738696	0.689825	0.853275	0.90938	0.878192	0.948352	0.642546	0.880282	0.222906	0.126594	0.0281112	0.67754	0.928223	0.729932	0.107688	0.627483	0.0336849
Q62167	1.19861	1.2077	1.39946	2.15834	1.91618	2.2227	2.24385	2.04581	2.27853	1.26859	2.09907	2.1894	0.113431	0.161626	0.125553	1.65465	1.72585	0.958745	0.00188715	0.000706286	0.48723
Q921G7	1.19878	1.62383	1.77697	0.820549	1.04875	0.750549	0.970679	0.900862	0.809975	1.53319	0.873282	0.893839	0.299558	0.155937	0.0805819	0.569583	0.582991	0.977002	0.0276697	0.0233786	0.849154
P47199	1.20045	1.46874	1.21607	0.84313	1.05596	0.935886	1.00592	1.20247	1.06834	1.29508	0.944993	1.09224	0.150589	0.106709	0.100432	0.729677	0.843377	0.865185	0.0303451	0.12424	0.15675
O35343	1.20078	1.48005	1.51064	1.40403	1.09599	1.1061	1.44745	1.16903	1.36726	1.39715	1.20204	1.32791	0.170753	0.175	0.143318	0.86035	0.950443	0.90521	0.239087	0.619143	0.389704
Q8BH64	1.20323	1.34749	1.41696	0.901381	1.3159	1.07713	1.31449	1.30703	1.04569	1.32256	1.09814	1.2224	0.109028	0.208058	0.153083	0.830314	0.92427	0.898345	0.173304	0.40822	0.451577
Q80Y14	1.20431	0.905528	1.0525	0.743999	0.802175	0.766563	0.77582	0.88336	0.799192	1.05411	0.770912	0.819457	0.1494	0.0293309	0.0565614	0.731337	0.77739	0.94076	0.0322267	0.0636943	0.257405
Q9QZ06	1.20452	1.10393	1.05986	1.41431	1.13474	1.4035	1.13583	1.29226	1.2169	1.12277	1.31752	1.21499	0.0741446	0.158381	0.0782335	1.17345	1.08214	1.08438	0.125986	0.212481	0.371666
Q9D2M8	1.20595	1.70374	1.90299	1.18798	1.60125	1.19508	1.84375	1.79946	1.66728	1.60423	1.32811	1.77016	0.359017	0.236579	0.0918112	0.827878	1.10344	0.750273	0.328333	0.481297	0.0392721
Q9CPQ3	1.20611	1.33214	1.47491	0.763687	0.71262	0.881462	1.08035	1.09948	1.08331	1.33772	0.785923	1.08771	0.134489	0.0865897	0.0102941	0.58751	0.81311	0.722546	0.00394209	0.032577	0.00389564
Q8R054	1.20693	1.02909	0.793318	0.854999	1.07589	0.996283	1.17673	0.931219	0.764015	1.00978	0.975725	0.957322	0.20748	0.111873	0.207593	0.966276	0.948052	1.01922	0.814741	0.77235	0.89901
Q9Z2M7	1.20852	1.15749	1.21086	1.32809	1.42587	1.35818	1.28006	1.31023	1.16836	1.19229	1.37071	1.25288	0.0301621	0.0500778	0.0747381	1.14964	1.05082	1.09405	0.00614403	0.262806	0.085861
P63323	1.20873	1.2424	1.22073	1.58384	1.68407	1.79828	1.74345	1.65836	2.15589	1.22395	1.68873	1.85257	0.0170647	0.107293	0.266109	1.37973	1.51359	0.911563	0.00176985	0.0150598	0.378647
Q8CI51	1.21206	1.7776	1.08925	1.13292	1.03327	1.0909	0.950421	1.28549	1.11741	1.35964	1.08569	1.11777	0.367135	0.050028	0.167534	0.798518	0.822112	0.9713	0.269561	0.357864	0.766543
P47911	1.21395	1.13606	1.32142	1.49808	1.63277	1.29541	1.25537	1.689	1.26911	1.22381	1.47542	1.40449	0.0930714	0.169817	0.246482	1.20559	1.14764	1.0505	0.0876041	0.300619	0.702539
O35350	1.21798	1.3966	1.43822	1.71837	1.49624	1.60016	1.31373	1.30423	1.40053	1.35093	1.60492	1.3395	0.117004	0.11114	0.0530671	1.18801	0.991537	1.19815	0.0526568	0.884972	0.0202488
Q9DCG9	1.21896	1.27198	0.944661	1.37649	1.52506	1.74899	1.6527	1.66469	1.65428	1.1452	1.55018	1.65722	0.175684	0.187513	0.00651372	1.35363	1.4471	0.935408	0.0524522	0.007259	0.379012
P53810	1.22111	1.50905	1.21667	1.90766	2.14023	2.15054	1.55589	1.27975	1.29053	1.31561	2.06615	1.37539	0.167535	0.137348	0.156412	1.57049	1.04544	1.50222	0.0038811	0.67485	0.00454205
Q8CH25	1.22175	0.943669	1.01255	0.84487	0.628836	0.875933	0.875126	1.14685	0.844233	1.05932	0.783213	0.955403	0.14482	0.134593	0.166516	0.739353	0.901901	0.819772	0.072849	0.460496	0.236062
P26369	1.22325	1.13591	1.12055	1.70812	1.43996	1.92837	1.38954	1.37887	1.3842	1.1599	1.69215	1.3842	0.0553981	0.2446	0.00533534	1.45887	1.19338	1.22247	0.0212819	0.00221513	0.0947336
Q3UM45	1.22349	1.23318	1.31189	0.952579	1.04921	1.09963	0.976537	1.03047	0.947418	1.25619	1.03381	0.984807	0.0484844	0.0747254	0.0421377	0.822971	0.783964	1.04976	0.0124071	0.00185559	0.378512
Q8BY89	1.22413	1.54063	1.42127	1.07538	0.996341	1.04705	1.11508	1.32792	0.844791	1.39534	1.03959	1.09593	0.159837	0.0400429	0.242133	0.745042	0.785421	0.94859	0.0201298	0.148391	0.711211
O88384	1.22545	1.1224	1.4159	1.3778	1.83391	1.46323	1.24112	1.53604	1.495	1.25458	1.55831	1.42405	0.148903	0.242467	0.159749	1.2421	1.13508	1.09428	0.138169	0.250094	0.468059
Q60668	1.22819	1.29773	0.993349	1.73523	1.69345	1.74978	1.18871	1.18731	1.44032	1.17309	1.72615	1.27211	0.159495	0.0292442	0.145672	1.47146	1.08441	1.35692	0.00410958	0.471635	0.00611611
Q9CZD3	1.229	1.32696	1.27419	1.39981	1.70998	1.43439	2.15501	1.68521	1.935	1.27672	1.51473	1.92508	0.0490284	0.169979	0.23506	1.18642	1.50783	0.78684	0.0802285	0.00947013	0.0704319
Q99L13	1.23005	1.46162	1.54349	0.756051	0.876149	0.849473	0.801316	0.90847	0.886106	1.41172	0.827224	0.865297	0.162569	0.0630648	0.0565264	0.58597	0.612939	0.956001	0.00437874	0.00533243	0.479679
P39054	1.2303	1.21703	1.13712	1.55826	1.28028	1.60723	1.38417	1.42948	1.30179	1.19482	1.48192	1.37181	0.0504063	0.176335	0.0647344	1.24029	1.14814	1.08026	0.0534562	0.0201808	0.367395
Q9QZ08	1.23117	0.962057	0.919701	0.632498	0.851212	0.726249	0.810802	0.850673	0.810617	1.03764	0.736653	0.824031	0.168933	0.109728	0.0230734	0.709929	0.794137	0.893963	0.060812	0.0958107	0.248428
Q6PD03	1.23251	1.52988	1.41242	1.35977	1.24325	1.29506	1.10362	1.07589	0.949343	1.3916	1.29936	1.04295	0.149774	0.0583809	0.0822433	0.933718	0.749462	1.24585	0.376549	0.0241401	0.0116605
Q3UVK0	1.23396	0.992428	1.12643	1.05803	0.909298	1.05991	0.912696	0.912341	0.876411	1.11761	1.00908	0.900483	0.121009	0.0864163	0.0208471	0.90289	0.805724	1.1206	0.274813	0.0375606	0.101815
P26645	1.23828	0.875023	1.06814	0.963647	0.62414	1.00228	1.6388	0.944931	1.41762	1.06048	0.863357	1.33378	0.181749	0.208066	0.354449	0.81412	1.25772	0.647299	0.284132	0.30041	0.118468
P37040	1.2397	1.16946	1.1022	1.80513	1.40006	1.55236	1.24475	1.33666	1.26367	1.17045	1.58585	1.2817	0.0687508	0.204601	0.0485311	1.3549	1.09504	1.2373	0.0290141	0.0838953	0.0663901
O54782	1.24053	0.961968	0.90774	1.01589	0.937592	1.06063	0.864141	1.21252	0.953018	1.03675	1.0047	1.00989	0.178553	0.0622769	0.18102	0.969093	0.974098	0.994861	0.783745	0.863753	0.964801
P27601	1.24101	1.17305	1.28531	1.16664	1.13833	1.09762	0.954636	1.14516	0.927496	1.23312	1.1342	1.0091	0.0565406	0.0346947	0.11861	0.919775	0.818325	1.12397	0.0611332	0.0418407	0.154411
Q9CQ65	1.24184	1.16993	1.20026	0.855896	0.959029	1.03603	1.39448	1.14862	1.31303	1.20401	0.950319	1.28538	0.0361045	0.0903828	0.125242	0.789294	1.06758	0.73933	0.0107012	0.340423	0.0198182
Q6ZWV3	1.24263	1.076	1.24803	1.68486	1.73932	1.764	2.1289	1.83311	2.23719	1.18888	1.72939	2.0664	0.0978014	0.040495	0.209163	1.45463	1.7381	0.836909	0.000902376	0.00275767	0.0519128
P29341	1.24459	1.06035	1.05063	2.35267	2.13786	1.95365	1.85103	1.96975	2.03527	1.11852	2.14806	1.95202	0.109286	0.199701	0.0933898	1.92044	1.74517	1.10043	0.00143427	0.000552831	0.198353
P47963	1.24591	1.31524	1.68518	2.23333	1.89536	1.51427	1.44794	1.92614	1.25191	1.41544	1.88099	1.542	0.236158	0.359746	0.346817	1.3289	1.08941	1.21984	0.134244	0.628983	0.305159
Q9D1G1	1.24678	1.22654	1.25975	1.21977	1.38433	1.28811	1.24165	1.28342	1.08183	1.24436	1.2974	1.2023	0.0167387	0.0826726	0.1064	1.04263	0.966201	1.0791	0.337297	0.535922	0.288636
P48453	1.2476	1.48783	1.43679	1.2356	1.15455	1.00715	0.999873	1.1078	0.917541	1.39074	1.13243	1.0084	0.126563	0.11582	0.095415	0.814267	0.725085	1.123	0.0595538	0.0139398	0.225519
Q8VDQ8	1.2493	1.53724	1.82059	1.19534	1.24986	1.17545	1.44394	1.55718	1.43406	1.53571	1.20689	1.4784	0.285646	0.0385233	0.0684064	0.785881	0.962677	0.816349	0.119348	0.752363	0.00390619
Q9CX13	1.25052	1.50504	1.48944	1.41577	1.34899	1.37014	1.13815	1.42003	1.31856	1.415	1.3783	1.29225	0.142657	0.0341304	0.14277	0.974065	0.913252	1.06659	0.687118	0.351582	0.367371
Q8BLN5	1.25078	0.989293	1.16938	0.823978	0.843223	0.718954	1.01814	0.890851	0.85075	1.13648	0.795385	0.919914	0.133811	0.0668867	0.0873987	0.699865	0.809439	0.86463	0.016828	0.078772	0.121579
P55850	1.2519	1.13291	1.32161	0.815342	0.884825	0.902552	0.824261	0.9581	0.713908	1.23547	0.867573	0.83209	0.0954123	0.0460936	0.122284	0.702218	0.673498	1.04264	0.0038503	0.0107841	0.662643
P28656	1.25335	0.862518	1.11178	1.11167	1.18805	1.26429	1.44481	1.22088	1.22994	1.07588	1.188	1.29854	0.197874	0.0763127	0.126752	1.10421	1.20695	0.914873	0.411652	0.176108	0.265293
Q62093	1.25343	1.36825	1.08253	2.16731	2.3901	2.08273	1.8697	1.66906	1.71912	1.23474	2.21338	1.75263	0.143777	0.15878	0.104432	1.79259	1.41943	1.26289	0.00137986	0.00724199	0.013704
Q9WTP7	1.25618	1.23699	1.40634	1.01447	1.19607	1.17383	0.890373	1.19623	0.924191	1.29984	1.12813	1.0036	0.0927348	0.0990508	0.167682	0.867897	0.772096	1.12408	0.0934901	0.0553581	0.330195
Q8JZU2	1.25799	0.998413	1.00679	0.671267	0.643897	0.564387	0.682252	0.778528	0.764109	1.08773	0.626517	0.74163	0.147506	0.0555193	0.0519258	0.575987	0.681815	0.844784	0.00713781	0.0185642	0.0586255
Q9QZD9	1.26041	0.988417	1.14564	1.31394	1.45224	1.40164	1.50471	1.26659	1.42676	1.13149	1.38927	1.39935	0.136548	0.0699726	0.121403	1.22783	1.23673	0.992797	0.0436769	0.0640333	0.906861
Q9CPV4	1.26363	1.13862	1.07422	0.958789	0.846216	1.01806	1.00585	0.931422	1.0253	1.15883	0.94102	0.987524	0.0963089	0.0872866	0.0495489	0.812047	0.852177	0.952909	0.0440116	0.0519347	0.467233
Q922Q8	1.26535	1.15635	1.18039	1.74949	1.27336	1.49317	2.06565	2.05316	2.12932	1.2007	1.50534	2.08271	0.0572696	0.238301	0.040845	1.25372	1.73459	0.722779	0.097658	2.65934e-05	0.014421
Q6Q477	1.26648	1.24314	1.33718	0.701498	0.903277	0.670331	0.811485	0.943828	0.657322	1.28227	0.758369	0.804212	0.0489664	0.126458	0.143391	0.591428	0.627179	0.942996	0.00259423	0.00545335	0.699225
P62267	1.26726	0.815468	1.21702	1.12912	1.35683	1.024	0.888198	1.04185	0.931033	1.09992	1.16998	0.953695	0.247617	0.170133	0.0792942	1.0637	0.867061	1.22679	0.706918	0.385175	0.116674
Q99KP3	1.26767	1.05019	1.00038	0.498956	0.787734	0.645561	0.630844	0.559765	0.514521	1.10608	0.644083	0.568376	0.14214	0.144394	0.0586377	0.582313	0.513867	1.1332	0.0168276	0.00375017	0.447487
P09671	1.26832	1.56102	1.5272	1.30276	1.75088	1.39206	1.02621	1.19583	1.37523	1.45218	1.4819	1.19909	0.160123	0.237183	0.174532	1.02046	0.825718	1.23585	0.866006	0.137868	0.171565
P80315	1.26871	1.2087	1.26213	1.72769	1.59174	1.54328	1.74754	1.65005	1.77574	1.24651	1.6209	1.72444	0.0329154	0.0956012	0.065949	1.30035	1.38341	0.939954	0.00303728	0.000357985	0.197421
Q9CX56	1.27054	1.20309	1.40324	1.54018	1.32448	1.58072	1.76741	1.59967	1.73332	1.29229	1.48179	1.70013	0.101829	0.137737	0.0886543	1.14664	1.3156	0.871575	0.127828	0.0063746	0.0821474
O70439	1.27157	1.08906	1.23407	1.28472	1.18017	1.46576	1.18774	1.42747	1.11297	1.19823	1.31022	1.24273	0.0963855	0.144493	0.164301	1.09346	1.03713	1.05431	0.326675	0.706492	0.621481
P60335	1.27283	1.32198	1.3162	1.60984	1.55588	1.7142	1.83255	1.68155	1.71734	1.30367	1.62664	1.74381	0.0268622	0.0804851	0.0789007	1.24774	1.33762	0.932805	0.00274169	0.000792988	0.146118
Q9EQP2	1.27334	1.33945	1.30638	1.16339	1.44894	1.40508	1.49125	1.78005	1.5102	1.30639	1.33914	1.59383	0.0330554	0.153772	0.161547	1.02507	1.22003	0.840199	0.736627	0.0391898	0.11908
Q8R0X7	1.278	1.03655	0.950684	0.94799	0.884825	0.856345	1.01284	1.14717	1.1798	1.08841	0.896387	1.11327	0.169711	0.0469036	0.0884894	0.823572	1.02284	0.805183	0.131905	0.83304	0.0199323
P51125	1.27939	1.05875	1.09555	1.12476	1.05178	1.26456	1.34541	1.13163	1.23807	1.14457	1.14703	1.23837	0.118204	0.108128	0.10689	1.00216	1.08196	0.926244	0.979992	0.365609	0.356865
P70362	1.28095	1.05763	1.26488	1.27813	0.895767	1.37557	1.36648	1.05758	1.31393	1.20115	1.18316	1.246	0.124556	0.253611	0.165275	0.985019	1.03733	0.949567	0.917476	0.726484	0.737363
O35683	1.2815	1.87484	1.89722	1.05545	0.818645	0.784562	0.944805	1.11703	1.04513	1.68452	0.886221	1.03566	0.349204	0.147549	0.086503	0.526096	0.614807	0.85571	0.0218223	0.0353911	0.204756
Q921F2	1.28358	1.49311	1.43719	2.09855	1.87921	1.83501	1.92735	1.85281	1.99267	1.40463	1.93759	1.92427	0.108491	0.141139	0.0699827	1.37943	1.36995	1.00692	0.00658126	0.00222585	0.890676
Q923T9	1.28693	1.3859	1.38501	0.674498	0.892566	0.595208	0.676556	0.870557	0.671418	1.35261	0.720757	0.73951	0.0568853	0.153982	0.113519	0.532862	0.546727	0.974641	0.00262998	0.00111773	0.873415
Q61263	1.28808	1.48912	1.4759	0.975338	0.636551	0.78254	0.997607	1.45821	1.00381	1.4177	0.798143	1.15321	0.11245	0.169931	0.264157	0.562985	0.813438	0.692106	0.00622788	0.185795	0.121835
Q9CQW2	1.29005	1.2947	1.17013	0.987942	1.11455	1.09566	1.10057	1.16602	1.25198	1.25163	1.06605	1.17286	0.0706175	0.0683013	0.0759362	0.851733	0.937068	0.908934	0.0307403	0.258634	0.144329
Q07417	1.2905	1.61691	1.66226	1.09858	1.08846	0.830589	1.1367	1.12956	1.00585	1.52322	1.00588	1.0907	0.202812	0.151888	0.0735713	0.660361	0.71605	0.922228	0.0240908	0.0255283	0.433122
P62320	1.29193	1.09191	1.43859	2.04825	2.10371	2.14782	1.07348	1.67529	1.2146	1.27414	2.09993	1.32112	0.174027	0.0498904	0.314727	1.64811	1.03687	1.5895	0.00138833	0.832088	0.0133362
Q8BGC4	1.29772	1.1101	1.25089	0.777905	0.978588	0.903252	0.914309	0.941102	0.925349	1.21957	0.886582	0.92692	0.0976489	0.101375	0.0134654	0.726962	0.760038	0.956482	0.0148829	0.00678078	0.532001
P19221	1.29901	1.08443	0.884262	2.0076	2.252	1.67317	1.16247	1.6894	1.40616	1.08923	1.97759	1.41934	0.207414	0.290583	0.263711	1.81558	1.30307	1.39331	0.0125474	0.163547	0.0693875
Q8JZN5	1.30121	1.30603	1.46454	0.802151	0.901622	0.737613	1.00553	1.01962	0.853462	1.35726	0.813795	0.959538	0.0929425	0.0826222	0.0921343	0.599587	0.706967	0.848112	0.00163303	0.0062384	0.11097
O35604	1.3014	1.01135	0.999403	1.02965	1.154	1.14901	0.901554	0.846103	0.845571	1.10405	1.11089	0.864409	0.171011	0.0703972	0.0321695	1.00619	0.782944	1.28514	0.952003	0.0755511	0.00527336
Q61087	1.30148	1.12491	1.36143	1.45155	1.09889	1.57512	1.33605	1.3592	1.36989	1.26261	1.37518	1.35505	0.122958	0.247127	0.0172986	1.08916	1.07321	1.01486	0.518916	0.266758	0.894844
Q9DCF9	1.30156	1.16814	1.25154	0.901001	0.845201	0.763391	1.4463	1.27177	1.17558	1.24041	0.836531	1.29788	0.0674015	0.0692132	0.137234	0.674398	1.04633	0.644536	0.00193057	0.550522	0.00652074
P50518	1.30162	1.13292	1.38859	2.32594	2.1981	2.52109	1.80352	2.00081	2.03782	1.27438	2.34838	1.94738	0.129997	0.162658	0.125958	1.84277	1.52811	1.20592	0.000868105	0.00299136	0.0278864
P48758	1.30243	1.47	1.53243	0.712255	0.911704	0.840548	1.05955	1.08546	1.05801	1.43495	0.821503	1.06768	0.118939	0.101079	0.0154238	0.572494	0.74405	0.76943	0.00243351	0.00607045	0.0140305
Q61937	1.30318	1.02475	1.17425	1.2885	1.29593	1.46568	1.59483	1.28116	1.58454	1.16739	1.35004	1.48685	0.139341	0.10022	0.1782	1.15646	1.27364	0.907989	0.139095	0.0707513	0.310935
Q9ERN0	1.30371	1.32258	1.13373	1.54693	1.46717	1.56902	1.25686	1.58874	1.4353	1.25334	1.52771	1.42697	0.104013	0.0535787	0.1661	1.21891	1.13853	1.0706	0.0153287	0.199696	0.374012
P56399	1.30452	1.1731	1.3665	1.15621	1.15393	1.26481	1.32752	1.24362	1.25703	1.28137	1.19165	1.27605	0.0987559	0.0633678	0.0450693	0.929979	0.99585	0.933854	0.255966	0.93646	0.133271
Q9R1P1	1.30504	1.3992	1.31968	1.67751	1.54399	1.88359	1.71076	1.44527	1.70146	1.3413	1.7017	1.61916	0.050671	0.171087	0.150671	1.26869	1.20716	1.05097	0.0249335	0.0388746	0.564631
Q61092	1.30613	1.13511	1.45927	1.01159	1.14984	1.09563	0.850377	0.970814	0.844804	1.30017	1.08569	0.888665	0.162159	0.0696561	0.0711977	0.835035	0.683498	1.22171	0.103075	0.0158046	0.0266306
Q6P9R2	1.30756	1.52909	1.55451	1.17439	1.41903	1.2383	0.968503	1.19267	1.10423	1.46372	1.27724	1.08847	0.135836	0.126884	0.112913	0.872597	0.743631	1.17343	0.157265	0.0212115	0.126543
Q8R317	1.30899	1.05309	1.19582	0.734915	0.871885	0.841796	0.965824	0.988287	0.996953	1.18597	0.816199	0.983688	0.128235	0.0719834	0.016066	0.688213	0.829439	0.829733	0.012108	0.0534842	0.0170553
Q64674	1.31248	1.09835	1.09027	1.27336	1.24472	1.3437	1.63683	1.50818	1.59596	1.16703	1.28726	1.58032	0.126027	0.0509333	0.0657357	1.10302	1.35414	0.814555	0.200299	0.00730201	0.00364526
Q8BH43	1.31391	1.12168	1.17318	1.13144	0.871519	1.23264	1.42943	1.17972	1.36351	1.20292	1.07853	1.32422	0.0995057	0.186284	0.129408	0.896594	1.10084	0.814468	0.365341	0.26752	0.133883
Q9D8Y0	1.31416	0.962488	1.15296	1.58391	1.42881	2.04495	0.810735	1.28723	1.00582	1.1432	1.68589	1.0346	0.176039	0.32048	0.239546	1.47471	0.904999	1.62952	0.0619323	0.561245	0.047857
Q60864	1.31533	1.1236	1.3106	1.01749	1.02632	1.18699	1.1241	1.24395	1.29828	1.24984	1.07693	1.22211	0.109354	0.0954187	0.0891243	0.861654	0.977812	0.881207	0.108013	0.75062	0.126414
Q9D0T1	1.31669	1.36329	1.40533	1.76682	2.11643	2.23497	1.57601	2.21698	1.58681	1.36177	2.03941	1.79327	0.0443364	0.24339	0.366985	1.49761	1.31686	1.13726	0.00900906	0.113262	0.3878
Q9WVJ3	1.31744	0.951128	0.896376	1.18767	1.34693	1.41524	1.00078	1.40973	1.16251	1.05498	1.31662	1.19101	0.228941	0.116777	0.205955	1.248	1.12893	1.10547	0.152637	0.486881	0.410134
Q4FZG7	1.31747	1.24234	1.55554	1.2407	1.30296	1.27272	0.915098	1.26033	1.3972	1.37178	1.27212	1.19088	0.163513	0.0311359	0.248444	0.927352	0.868125	1.06822	0.358302	0.351543	0.604102
A0A338P6S8	1.31797	1.11177	0.979711	0.988182	0.639265	1.04735	1.39513	0.841394	1.14209	1.13648	0.891598	1.1262	0.170479	0.22052	0.277211	0.784524	0.990955	0.791684	0.202731	0.958995	0.315268
Q99JR5	1.31853	1.10896	1.09643	1.1328	1.51512	1.13163	0.751336	1.13554	0.728898	1.17464	1.25985	0.871924	0.124772	0.221068	0.228571	1.07254	0.742292	1.44491	0.59215	0.11435	0.102144
P80318	1.31872	1.29343	1.41364	1.93703	1.85045	1.86907	2.00865	1.79209	1.90694	1.34193	1.88552	1.90256	0.0633789	0.0455761	0.108346	1.40508	1.41777	0.991043	0.000271027	0.00150384	0.814101
Q3THS6	1.31939	1.07187	1.12997	1.22499	1.43289	1.29577	1.3962	1.17181	1.30109	1.17374	1.31788	1.2897	0.129436	0.105698	0.112624	1.1228	1.09879	1.02185	0.209488	0.306743	0.767783
Q8BVI4	1.32196	1.41845	1.28071	0.906429	1.21967	1.06682	0.94619	1.21831	0.997327	1.34037	1.06431	1.05394	0.070695	0.156636	0.144626	0.794038	0.786306	1.00983	0.0496959	0.0368663	0.936945
Q8R422	1.32333	1.23937	1.44946	0.811601	0.884497	0.925463	1.1315	1.21578	1.00884	1.33739	0.873854	1.11871	0.105744	0.0576725	0.10406	0.653403	0.836485	0.78113	0.00263196	0.0630997	0.0234885
Q61702	1.32459	0.849875	0.87534	1.67134	1.82353	1.52651	1.10428	1.51135	1.42217	1.0166	1.67379	1.34594	0.267032	0.148522	0.213975	1.64646	1.32395	1.24359	0.0203804	0.170843	0.094728
Q8BI08	1.3309	1.47933	1.70715	1.1782	0.83979	1.20652	1.32043	1.21265	1.22652	1.50579	1.07484	1.2532	0.189513	0.204048	0.0586342	0.713801	0.832251	0.857676	0.0552054	0.0920916	0.219333
P50544	1.33239	2.0159	2.11597	1.0475	1.27293	0.791854	1.34116	1.27084	1.07215	1.82142	1.03743	1.22805	0.426457	0.240697	0.139518	0.569572	0.674228	0.844776	0.0501779	0.0838115	0.300988
Q9JHW2	1.33627	1.4002	1.15743	0.965848	1.08301	1.0995	1.09586	1.11962	1.12383	1.29797	1.04945	1.1131	0.125837	0.0728708	0.0150788	0.808536	0.857574	0.942818	0.0415501	0.0649098	0.212598
Q3THK7	1.33642	1.24443	1.42064	1.92712	1.75615	1.7225	1.7296	1.81441	1.67686	1.33383	1.80193	1.74029	0.0881334	0.10972	0.0693981	1.35094	1.30473	1.03542	0.00450401	0.00329068	0.457104
Q922B2	1.35307	1.48163	1.41447	2.37908	1.95474	2.09345	1.76856	1.57878	1.54005	1.41639	2.14242	1.62913	0.064302	0.216366	0.122296	1.51259	1.1502	1.31507	0.00508625	0.0559916	0.0232275
P24369	1.35693	1.55329	1.14077	2.00678	1.40224	2.19525	2.58471	2.44484	2.67962	1.35033	1.86809	2.56972	0.20634	0.414294	0.118106	1.38343	1.90304	0.72696	0.124722	0.000887133	0.0477815
P29452	1.3575	1.27977	1.28317	1.36255	1.4437	1.54521	1.39807	1.18871	1.50955	1.30681	1.45049	1.36544	0.04393	0.091519	0.162892	1.10994	1.04487	1.06228	0.0703471	0.579677	0.474591
Q61789	1.35751	1.36326	1.78752	1.43541	1.07247	1.42587	1.33856	1.38767	1.11089	1.50276	1.31125	1.27904	0.246622	0.206848	0.147679	0.87256	0.851126	1.02518	0.360993	0.248931	0.837
Q9DCS9	1.35757	1.68829	2.06558	1.09805	1.24875	0.734061	0.695159	1.20829	0.812186	1.70381	1.02696	0.905211	0.354262	0.264609	0.268915	0.602739	0.531285	1.13449	0.0569029	0.035872	0.60602
Q68FH4	1.36027	1.17305	1.61469	0.800014	1.11626	0.726564	0.704221	0.883243	0.752234	1.38267	0.880947	0.779899	0.221669	0.207072	0.0926621	0.637133	0.564052	1.12956	0.0457073	0.0122003	0.483464
Q9R0Q6	1.36133	1.1848	0.932356	0.814392	1.03639	0.911677	1.22416	1.02878	0.693321	1.15949	0.920818	0.982088	0.215602	0.111279	0.268481	0.794155	0.846996	0.937613	0.163614	0.422621	0.733493
Q9Z2U0	1.36432	1.43732	1.57491	1.68928	1.94587	1.85984	1.78937	1.63345	1.79628	1.45885	1.83166	1.7397	0.106935	0.130599	0.092077	1.25555	1.19252	1.05286	0.0186888	0.0261215	0.375271
Q9JLV1	1.36624	1.55585	1.77704	0.672416	1.05102	0.68996	1.01543	1.36385	0.915219	1.56638	0.804466	1.09817	0.205599	0.213704	0.235484	0.513584	0.701088	0.732553	0.0112457	0.060417	0.184909
O70400	1.36757	1.54681	2.00336	1.01925	0.847854	1.12632	1.34863	1.73571	1.30573	1.63925	0.997808	1.46336	0.327819	0.140467	0.236836	0.608699	0.8927	0.681863	0.0356935	0.493178	0.042883
Q9D7Q1	1.37189	1.67003	1.95045	1.97681	2.00312	2.30909	1.93384	1.68231	1.71598	1.66413	2.09634	1.77738	0.289324	0.184713	0.136544	1.25972	1.06805	1.17946	0.0946487	0.57294	0.0739448
P54923	1.37307	1.0888	1.29084	1.7113	1.45686	1.7245	1.40091	1.26806	1.29155	1.2509	1.63089	1.32017	0.146284	0.150857	0.0708985	1.30377	1.05538	1.23536	0.0351158	0.501439	0.0320159
Q9CQU0	1.37424	1.47964	0.984888	1.00347	1.23933	1.27709	1.15565	1.21833	1.22153	1.27959	1.1733	1.1985	0.260604	0.148279	0.0371481	0.916933	0.93663	0.978971	0.572412	0.62193	0.789379
Q8BMS1	1.37899	1.66052	1.71899	0.972091	1.23408	0.860354	1.10958	1.20106	1.05617	1.58617	1.02218	1.12227	0.181786	0.191831	0.073271	0.64443	0.707535	0.910809	0.020903	0.0148587	0.446046
Q9ET22	1.3805	0.975372	0.970395	0.711781	0.827849	0.635649	0.912931	0.886869	0.805103	1.10876	0.725093	0.868301	0.235352	0.096789	0.056261	0.653969	0.78313	0.835071	0.0593371	0.160341	0.0910555
P17710	1.38487	1.54112	1.57701	1.5627	1.46069	1.51399	1.21874	1.4338	1.34827	1.501	1.51246	1.33361	0.102159	0.0510235	0.108281	1.00763	0.888478	1.13411	0.870451	0.123293	0.060812
P58044	1.38999	1.51194	1.38949	1.09044	1.33808	1.24288	2.17926	2.06135	2.10132	1.43047	1.2238	2.11398	0.0705542	0.124918	0.0599653	0.855524	1.47782	0.57891	0.0671179	0.000215663	0.000371194
Q9D3B1	1.39124	1.37892	1.32036	0.92097	0.593338	0.725591	0.58337	0.844459	0.726035	1.3635	0.746633	0.717954	0.0378727	0.164826	0.130732	0.547584	0.526551	1.03994	0.00321111	0.00119669	0.824944
O88342	1.3924	1.31051	1.35067	2.63078	2.06071	2.61311	1.95895	1.6685	1.96274	1.35119	2.43487	1.86339	0.0409497	0.324147	0.168795	1.80201	1.37907	1.30668	0.00455024	0.00694542	0.0536263
P08752	1.3955	1.06245	1.1955	1.96232	1.33919	1.61646	1.29362	1.43823	1.16358	1.21782	1.63932	1.29848	0.167646	0.312191	0.137386	1.34612	1.06623	1.2625	0.108418	0.554317	0.158525
Q6DFW4	1.39917	1.3178	1.48756	1.46967	1.3647	1.20625	1.27444	1.5529	1.04222	1.40151	1.34687	1.28985	0.084902	0.132615	0.255691	0.961015	0.920328	1.04421	0.580239	0.512539	0.748937
Q2UY11	1.40339	0.893532	1.14616	0.511106	0.694936	0.690455	0.925139	0.738091	0.58515	1.14769	0.632166	0.74946	0.254935	0.104865	0.170279	0.550814	0.653014	0.843495	0.0316976	0.0876536	0.367127
P47962	1.40739	1.16215	1.3658	1.79046	1.79145	1.57619	1.74955	2.15395	1.83905	1.31178	1.71937	1.91418	0.131244	0.123993	0.21241	1.31072	1.45923	0.898226	0.0173935	0.0139314	0.241999
P81117	1.40919	0.843808	1.00031	0.848337	0.930686	0.923861	0.997139	0.949333	0.878682	1.08444	0.900961	0.941718	0.29193	0.045702	0.0595947	0.830809	0.868392	0.956721	0.342701	0.453372	0.400453
Q91ZX7	1.41175	1.04331	1.06546	1.05103	1.21305	1.04827	1.19803	1.18647	1.10211	1.17351	1.10412	1.1622	0.206625	0.0943502	0.0523605	0.940868	0.990368	0.950019	0.624717	0.931232	0.403909
O89079	1.41208	1.07039	1.23075	1.04448	1.10652	1.05771	1.55203	1.2717	1.32731	1.23774	1.06957	1.38368	0.170948	0.032678	0.148422	0.864132	1.11791	0.772988	0.169527	0.32672	0.0231704
P42208	1.41304	1.14848	1.19965	1.04715	1.17153	1.24533	1.66294	1.44236	1.47128	1.25372	1.15467	1.52553	0.140324	0.100157	0.119876	0.920994	1.2168	0.756898	0.375996	0.0632455	0.0147076
Q99LI8	1.41657	1.08648	1.13312	1.36113	1.42556	1.46843	1.42503	1.33988	1.15604	1.21205	1.41838	1.30699	0.178643	0.0540074	0.137479	1.17023	1.07832	1.08523	0.128032	0.506159	0.261532
P62331	1.41774	1.58073	1.57121	1.05381	1.21522	0.943813	1.39962	1.20245	1.27529	1.52323	1.07095	1.29245	0.0914772	0.136515	0.0997023	0.70308	0.848498	0.828618	0.00885943	0.0418011	0.085773
Q62433	1.41785	1.1937	1.44932	0.911938	1.35352	1.08317	1.09561	0.985525	1.02781	1.35362	1.11621	1.03632	0.139386	0.222635	0.0555349	0.824608	0.765588	1.07709	0.192516	0.0215251	0.578993
P62141	1.41916	1.61904	1.5173	1.60423	1.30212	1.65826	1.82025	1.34051	1.66277	1.5185	1.52154	1.60784	0.0999434	0.191932	0.244538	1.002	1.05884	0.946322	0.981774	0.589484	0.655726
Q8VD62	1.42199	1.41175	1.3073	1.27503	1.44281	1.34856	1.54025	1.23376	1.34464	1.38035	1.35547	1.37288	0.0634666	0.0841009	0.155186	0.981974	0.994592	0.987314	0.703467	0.942234	0.872594
P62774	1.42412	1.07161	1.24593	1.4464	1.65689	1.39277	1.21001	1.30902	1.43908	1.24722	1.49869	1.31937	0.176257	0.13961	0.114886	1.20162	1.05785	1.13591	0.124797	0.584497	0.160963
P34022	1.42457	1.43472	1.71329	2.35146	2.18332	2.44515	2.41968	2.3352	2.32673	1.52419	2.32664	2.36054	0.16384	0.132669	0.0513945	1.52647	1.54871	0.98564	0.00274182	0.00108129	0.701022
Q9CY50	1.42494	1.57446	1.1356	1.57536	1.41916	1.77406	2.23702	1.73882	1.74772	1.37834	1.58953	1.90785	0.223112	0.177871	0.285102	1.15322	1.38417	0.833149	0.269114	0.0644319	0.17619
P17563	1.42802	1.51047	1.52463	0.574889	0.923514	0.738675	1.0283	0.812819	0.992584	1.48771	0.745693	0.944568	0.0521748	0.174419	0.115487	0.501236	0.634915	0.789453	0.00212372	0.00175767	0.174971
P62717	1.43164	1.58634	1.58996	2.14571	2.05367	1.95696	2.72568	2.64925	2.63997	1.53598	2.05212	2.67163	0.0903791	0.094381	0.0470353	1.33603	1.73937	0.768113	0.00238868	4.24271e-05	0.000525353
Q9DBS1	1.43348	1.38572	1.50688	1.39888	1.40101	1.24922	1.46855	1.20186	1.28526	1.44203	1.3497	1.31856	0.0610299	0.087029	0.136428	0.935976	0.914377	1.02362	0.206922	0.225703	0.755596
Q9CR64	1.43509	1.93865	1.58129	1.39229	1.31445	1.29519	1.74397	1.68821	1.39597	1.65168	1.33397	1.60938	0.259055	0.0514125	0.186915	0.807649	0.974394	0.828873	0.1056	0.829875	0.0696391
Q9D1R9	1.43769	1.22656	1.82585	1.81733	1.66519	1.2236	1.39143	2.02984	1.29006	1.4967	1.56871	1.57044	0.303973	0.3084	0.401066	1.04811	1.04927	0.998895	0.787638	0.812157	0.995544
O35206	1.43816	1.35102	1.12606	0.624337	1.01364	0.672323	0.925337	0.83198	0.783283	1.30508	0.7701	0.846866	0.161041	0.212273	0.0721874	0.590078	0.648899	0.909353	0.0254057	0.0108464	0.58507
Q9WTP6	1.43953	1.60002	1.58525	1.99568	1.93007	2.05072	1.68865	1.69958	1.87799	1.5416	1.99216	1.7554	0.0887047	0.0604001	0.106299	1.29227	1.13869	1.13487	0.00189975	0.0555277	0.0284614
Q8K0C4	1.44177	1.18756	1.34058	0.929281	1.21008	0.674511	0.92225	1.08714	0.904432	1.3233	0.937959	0.971274	0.127982	0.267892	0.100738	0.708802	0.733977	0.9657	0.0878334	0.0200582	0.850056
P63038	1.44295	1.49499	1.47606	1.25187	1.11363	1.26772	1.41721	1.38011	1.39592	1.47133	1.21108	1.39775	0.0263402	0.0847632	0.0186166	0.823113	0.949985	0.866449	0.00708775	0.0167947	0.0203745
Q8R2Z5	1.44314	0.975702	1.02004	0.589861	0.688182	0.680001	0.607928	0.701882	0.495504	1.14629	0.652681	0.601771	0.258028	0.0545576	0.103326	0.569384	0.524972	1.0846	0.0316211	0.0274482	0.492449
Q8C166	1.44509	1.32574	1.37235	2.45238	1.92938	2.34458	1.47019	1.58216	1.51183	1.38106	2.24211	1.52139	0.0601488	0.276144	0.0565937	1.62347	1.10161	1.47372	0.00618259	0.042258	0.0114353
Q9WUL7	1.44515	0.950377	1.03035	0.746983	0.835993	0.839993	1.00639	0.899794	0.919207	1.14196	0.807656	0.941798	0.265597	0.0525831	0.0567769	0.707255	0.824721	0.857569	0.0992441	0.270859	0.0398498
O88456	1.44676	1.43	1.3393	1.53758	1.73836	1.65073	1.7561	1.46323	1.64475	1.40536	1.64222	1.62136	0.0578141	0.100663	0.147829	1.16855	1.1537	1.01287	0.0241379	0.077915	0.849746
Q9CX34	1.44743	1.41483	1.62066	1.57493	1.6311	1.5707	1.53981	1.32551	1.62781	1.49431	1.59224	1.49771	0.110636	0.0337144	0.155488	1.06554	1.00228	1.06312	0.216367	0.976833	0.361585
O35344	1.4504	1.8218	1.83677	1.37758	1.62993	1.46511	1.95852	1.93674	1.56825	1.70299	1.49087	1.82117	0.218876	0.128133	0.219304	0.875444	1.0694	0.818635	0.221029	0.544951	0.0874135
Q9CQC7	1.45092	1.60354	1.5799	0.929871	0.882282	0.591789	0.870918	0.835818	0.67098	1.54479	0.801314	0.792572	0.0821446	0.183008	0.106754	0.518721	0.513061	1.01103	0.00302667	0.000639262	0.946456
Q60973	1.45326	1.09376	1.35038	1.37278	1.40705	1.45037	1.3269	1.13683	1.22722	1.29913	1.41007	1.23032	0.185147	0.0388863	0.0950699	1.08539	0.947029	1.1461	0.367248	0.59751	0.038741
Q8BH95	1.45759	1.87596	1.88367	1.13168	1.32771	1.24034	1.14115	1.48224	1.25689	1.73908	1.23325	1.29343	0.243801	0.0982069	0.173456	0.709138	0.743745	0.95347	0.0290153	0.0613432	0.628634
Q7TPR4	1.46383	1.45725	1.43516	2.32048	1.83172	2.23796	1.916	1.64653	1.70952	1.45208	2.13006	1.75735	0.0150183	0.261637	0.140957	1.4669	1.21023	1.21208	0.0109827	0.0202973	0.0955799
Q3TDN2	1.4642	1.46825	1.83933	1.76983	1.46268	1.68361	1.14848	2.00361	1.79233	1.59059	1.63871	1.64814	0.215421	0.158419	0.445425	1.03025	1.03618	0.994275	0.770874	0.85017	0.974079
O35381	1.4683	1.23831	1.1939	1.14963	1.3103	1.42231	1.07024	0.926167	0.969262	1.30017	1.29408	0.988556	0.147287	0.137065	0.0739479	0.995316	0.760328	1.30906	0.960704	0.0306471	0.0273314
Q9Z1D1	1.46872	1.22029	1.6234	2.06748	1.3159	1.77736	1.56981	1.60264	1.74654	1.43747	1.72025	1.63966	0.203363	0.37903	0.0940042	1.19672	1.14066	1.04915	0.318402	0.193048	0.738832
P56959	1.46955	0.92331	1.21984	2.12178	2.11605	2.0847	1.55884	1.73806	1.58808	1.20423	2.10751	1.62833	0.273454	0.0199606	0.0961518	1.75008	1.35217	1.29428	0.0046635	0.0643838	0.00107375
Q6PHZ2	1.4696	1.26549	1.18625	0.898019	1.19957	0.964074	1.04829	1.21449	1.03712	1.30711	1.02055	1.09996	0.146188	0.158509	0.0993356	0.780768	0.841521	0.927806	0.0827737	0.11221	0.502951
Q9CXR1	1.47029	1.36668	1.46562	1.5319	1.10548	1.23501	0.894387	0.988417	0.831024	1.4342	1.2908	0.904609	0.0585199	0.218611	0.0791927	0.900015	0.630743	1.42691	0.334054	0.000739098	0.045157
Q9CYN2	1.47611	1.32185	1.49521	1.94608	1.67977	1.83436	1.61944	1.75498	1.62346	1.43106	1.82007	1.66596	0.095061	0.133731	0.0771175	1.27184	1.16415	1.0925	0.0147732	0.0292736	0.158851
O08807	1.48109	1.09824	1.0303	0.737447	0.944697	0.71094	0.846746	1.09172	1.05598	1.20321	0.797695	0.998151	0.243038	0.127996	0.132332	0.662973	0.829574	0.799172	0.0628357	0.268642	0.132379
Q8BPU7	1.48157	2.26678	1.57628	3.31313	2.35397	3.10008	2.11841	1.88118	2.20865	1.77488	2.92239	2.06941	0.428626	0.503661	0.169141	1.64653	1.16595	1.41218	0.0397353	0.330331	0.0497826
Q9QY23	1.48655	1.39273	1.66658	1.38543	1.53989	1.33347	1.52852	1.54464	1.34943	1.51529	1.4196	1.4742	0.139171	0.107368	0.108349	0.936851	0.972883	0.962963	0.399116	0.707211	0.568844
P49935	1.48836	1.28619	1.15447	0.960847	0.902302	1.20431	0.877197	1.22464	1.24738	1.30967	1.02249	1.11641	0.168181	0.160159	0.207473	0.780717	0.852431	0.915872	0.0988823	0.278329	0.568435
Q11011	1.48992	1.65327	1.80527	1.91894	1.90017	1.79324	1.69301	1.4939	1.63258	1.64948	1.87078	1.60649	0.157706	0.067809	0.102085	1.13416	0.973936	1.16451	0.08933	0.712067	0.0202052
Q9Z2W0	1.49109	1.58476	1.46024	1.27195	1.42633	1.35926	1.46777	1.4476	1.46671	1.51203	1.35252	1.46069	0.0648445	0.0774083	0.0113514	0.894503	0.966047	0.925942	0.0521154	0.248129	0.0747698
Q61129	1.49286	1.0143	0.886175	1.80009	1.53899	1.63885	1.18273	1.03806	1.74237	1.13111	1.65931	1.32106	0.319765	0.131745	0.371972	1.46697	1.16793	1.25605	0.0572603	0.539151	0.2118
Q3TIU4	1.49295	1.2361	1.08712	1.86892	1.64109	1.78342	1.71547	1.79899	1.90012	1.27205	1.76448	1.80486	0.205291	0.115091	0.092462	1.38711	1.41885	0.977626	0.0222789	0.014868	0.660358
Q9D1D4	1.49442	1.07196	1.37885	1.4461	1.42155	1.35858	1.47901	1.43223	1.54575	1.31508	1.40874	1.48566	0.21833	0.0451407	0.0570536	1.07123	1.12972	0.948225	0.507114	0.260569	0.141018
Q8R5J9	1.49814	2.10912	2.01044	1.50501	1.724	1.31077	1.64633	2.46371	1.51658	1.87257	1.51326	1.87554	0.327995	0.206741	0.513486	0.808119	1.00159	0.806839	0.183728	0.993668	0.320303
Q920A5	1.49881	1.10323	1.26396	0.820511	1.15228	1.2184	1.65104	1.15784	1.56254	1.28866	1.06373	1.45714	0.198944	0.213213	0.262952	0.825452	1.13074	0.730011	0.252492	0.426144	0.114427
O54734	1.49989	1.3401	1.38336	1.37163	1.15918	1.27786	1.58758	1.47889	1.41125	1.40778	1.26956	1.49257	0.0826447	0.106471	0.0889601	0.901813	1.06023	0.850582	0.150329	0.293072	0.0496109
Q5XJY5	1.50016	1.19242	1.24514	1.25648	1.11519	1.31621	1.64111	1.55823	1.62418	1.31257	1.22929	1.60784	0.164581	0.103233	0.0437908	0.936553	1.22495	0.764562	0.499043	0.0398272	0.00426728
P47941	1.50109	1.49479	1.51845	1.21194	1.46587	1.2253	0.873435	0.859741	1.00925	1.50477	1.30104	0.914141	0.0122512	0.142903	0.0826477	0.864606	0.607493	1.42323	0.0696638	0.000255486	0.0153569
P00493	1.50299	1.48648	1.35659	2.4605	1.9874	2.74382	2.6511	2.01312	2.43084	1.44869	2.39724	2.36502	0.0801843	0.382156	0.324043	1.65477	1.63253	1.01362	0.0136132	0.00894115	0.916677
Q8VDW0	1.50374	1.58734	1.78764	2.77507	2.2365	2.70789	2.45974	2.32258	2.37929	1.62624	2.57315	2.38721	0.145894	0.293479	0.0689216	1.58227	1.46793	1.07789	0.00746799	0.00122288	0.345543
P58389	1.50613	1.54182	1.55361	1.51197	1.44353	1.62499	1.36468	1.36524	1.23953	1.53385	1.52683	1.32315	0.0247261	0.0916371	0.0724155	0.995424	0.862631	1.15394	0.904265	0.00884465	0.0391411
Q9WTI7	1.50667	1.35234	1.4825	0.95125	1.28543	1.00287	1.25658	1.36058	1.06322	1.44717	1.07985	1.22679	0.0830096	0.179899	0.150898	0.746182	0.847719	0.880223	0.0325536	0.0909839	0.339366
Q9JKF1	1.50912	1.34257	1.56914	2.43497	1.90712	2.34448	1.48769	1.59899	1.47625	1.47361	2.22886	1.52098	0.117386	0.282282	0.0678063	1.51252	1.03214	1.46541	0.012859	0.57769	0.0134417
P16332	1.51118	1.74259	1.73255	0.803161	0.928437	0.766704	1.04541	1.23713	0.970889	1.6621	0.832767	1.08448	0.130805	0.0848338	0.137354	0.501032	0.652474	0.767896	0.000771034	0.00619222	0.0540632
Q9QUM9	1.5125	1.58011	1.48007	2.00222	1.98991	2.22575	2.02973	1.7874	1.88599	1.52423	2.07263	1.90104	0.0510413	0.132748	0.121864	1.35979	1.24721	1.09026	0.00261287	0.00781783	0.174438
Q9JLJ2	1.51858	1.23899	1.2203	1.41688	1.49367	1.61817	1.10881	1.13151	1.06458	1.32596	1.50957	1.10164	0.16708	0.101587	0.0340382	1.13848	0.830823	1.3703	0.179184	0.084913	0.00273844
P61961	1.51986	1.76171	1.5495	1.14552	1.39163	1.51658	1.91523	2.73996	1.89927	1.61036	1.35125	2.18482	0.131908	0.188794	0.480834	0.839097	1.35673	0.61847	0.123148	0.116703	0.0490631
P62137	1.52054	1.48218	1.62314	2.07096	1.97421	1.9787	2.0177	1.76853	1.73842	1.54196	2.00796	1.84155	0.0728788	0.0546071	0.153291	1.30221	1.1943	1.09036	0.000894995	0.0377596	0.151226
P97797	1.5226	1.02032	0.994863	2.53415	2.0464	2.44174	1.67241	2.02147	1.67284	1.17926	2.34076	1.78891	0.297611	0.259079	0.201406	1.98495	1.51698	1.30849	0.00698974	0.0424553	0.0435574
P41105	1.5273	1.18905	1.60036	2.16025	2.24908	1.9798	1.81328	2.08455	1.68218	1.4389	2.12971	1.86	0.219439	0.13721	0.205213	1.48009	1.29266	1.145	0.00985717	0.0721633	0.131394
Q60597	1.52738	2.33741	2.2484	1.1076	1.33653	0.903233	1.46147	1.41326	1.18076	2.03773	1.11579	1.35183	0.44421	0.216765	0.150098	0.547563	0.6634	0.825389	0.0319546	0.0644102	0.195927
P50516	1.53037	1.16631	1.24962	1.98447	1.68797	2.03066	1.85101	1.64327	1.95575	1.31543	1.90104	1.81667	0.190744	0.18596	0.159044	1.44518	1.38105	1.04644	0.0189804	0.0249921	0.582569
Q9DCC4	1.53326	1.31026	1.30626	1.12452	0.841291	1.13101	0.749191	0.910501	0.904733	1.38326	1.03227	0.854809	0.129916	0.165426	0.0915126	0.746259	0.617966	1.20761	0.0445535	0.00450719	0.179302
Q9EQK5	1.54198	1.32802	1.55045	1.52651	1.64146	1.56603	1.49057	1.83982	1.44517	1.47348	1.578	1.59185	0.126046	0.0584036	0.215941	1.07093	1.08033	0.991296	0.26249	0.458277	0.919733
Q9D708	1.54709	1.51762	1.3923	1.51697	1.65422	1.44263	1.91264	1.52641	1.69706	1.48567	1.53794	1.71204	0.0821913	0.107346	0.193552	1.03518	1.15237	0.898311	0.539754	0.135683	0.244728
Q8VIJ6	1.54829	1.19909	1.18636	1.93002	1.47918	1.77468	1.54673	1.46683	1.52731	1.31125	1.72796	1.51362	0.205386	0.229018	0.04167	1.3178	1.15434	1.1416	0.0788369	0.169725	0.185979
P53026	1.54903	1.42748	1.49235	1.97823	1.97503	1.87051	2.604	2.38887	2.28987	1.48962	1.94126	2.42758	0.0608238	0.0612851	0.160602	1.30319	1.62966	0.799667	0.000822668	0.000696491	0.00804266
Q9CQS8	1.54965	1.29103	1.16717	1.11069	1.21352	0.846684	1.76742	1.6564	1.67412	1.33595	1.05696	1.69931	0.195157	0.189226	0.059644	0.791171	1.27199	0.621996	0.150098	0.0367857	0.00496751
Q8BMK4	1.55127	1.11032	1.16364	1.37546	1.13906	1.30358	2.05513	1.67399	1.98771	1.27508	1.2727	1.90561	0.240672	0.121183	0.203398	0.998134	1.49451	0.667869	0.988528	0.025681	0.00980634
Q91VJ2	1.55166	1.92324	1.61186	1.37909	1.58249	1.7897	2.17563	1.86269	1.65465	1.69559	1.58376	1.89766	0.199438	0.205305	0.262245	0.934048	1.11918	0.834586	0.535704	0.347971	0.17792
Q3TYQ9	1.5575	1.55801	1.56748	1.19559	0.925808	1.45211	1.2943	1.30215	1.05983	1.561	1.19117	1.21876	0.00562258	0.263178	0.13769	0.763083	0.780758	0.977363	0.071719	0.0126305	0.879982
P53994	1.55916	1.59059	1.62426	1.67018	1.52553	1.60712	1.59345	1.56963	1.46255	1.59134	1.60094	1.54188	0.032553	0.0725218	0.0697195	1.00604	0.96892	1.03831	0.84444	0.327952	0.366689
Q9CZ44	1.55959	1.49033	1.69452	1.12135	1.40378	1.30133	1.24983	1.42723	1.19891	1.58148	1.27549	1.29199	0.103839	0.142976	0.11986	0.806514	0.816949	0.987227	0.0399678	0.0341239	0.885656
P63321	1.56367	1.44943	1.40274	1.48196	1.2349	1.24542	1.0863	1.32399	1.11814	1.47195	1.32076	1.17615	0.082798	0.139706	0.129024	0.897289	0.799042	1.12296	0.182157	0.0287838	0.258184
Q99K48	1.56397	1.30127	1.35342	1.74402	1.0076	1.58886	1.68673	1.55693	1.8009	1.40622	1.44683	1.68152	0.139081	0.388212	0.122067	1.02888	1.19577	0.86043	0.87284	0.0615371	0.374382
O35737	1.56444	1.37673	1.65048	1.64276	1.84271	1.86607	1.99287	1.80944	1.92634	1.53055	1.78385	1.90955	0.139989	0.122745	0.0928606	1.16549	1.24762	0.934173	0.0779672	0.0174284	0.230107
Q3TEA8	1.5664	1.4048	1.31265	1.50556	1.32791	1.52188	0.995124	1.24059	0.882191	1.42795	1.45178	1.0393	0.128449	0.107585	0.183235	1.01669	0.727828	1.39689	0.817494	0.0396199	0.0282437
Q3UGR5	1.56887	1.61094	1.46494	0.760888	0.791391	0.919729	0.826982	0.878408	0.902986	1.54825	0.824003	0.869459	0.0751514	0.0842928	0.0387839	0.532215	0.561574	0.947719	0.000373658	0.000155228	0.44394
Q9Z1A1	1.5712	1.3973	1.67987	1.30425	1.22843	1.23262	1.57045	1.40565	1.58902	1.54946	1.2551	1.5217	0.142536	0.0426173	0.100937	0.810027	0.98209	0.824799	0.0266088	0.796791	0.0135362
O08539	1.57217	1.92913	2.04199	1.08319	1.41463	0.975073	1.2287	1.90439	1.19383	1.84776	1.15763	1.44231	0.245251	0.229036	0.400555	0.626504	0.780569	0.802625	0.0235405	0.209174	0.345443
Q922Q1	1.57336	1.8497	1.9507	1.10917	1.25478	1.00952	1.12795	1.41305	0.995092	1.79125	1.12449	1.1787	0.195342	0.123344	0.213551	0.627769	0.65803	0.954012	0.00749643	0.0214686	0.722773
P61021	1.574	0.936342	1.30529	1.4103	1.23482	1.49211	0.785806	1.16253	1.04907	1.27188	1.37907	0.999134	0.320139	0.131458	0.193262	1.08428	0.785558	1.38027	0.620065	0.275104	0.0480479
P57780	1.57508	1.35907	1.56661	1.5977	1.58546	1.65251	1.92477	1.54642	1.83564	1.50025	1.61189	1.76894	0.122338	0.035706	0.197794	1.07441	1.1791	0.911216	0.203812	0.115979	0.247349
P23492	1.57639	1.50158	1.44734	2.38699	1.98618	2.67242	1.75046	1.80095	2.06028	1.50844	2.34853	1.87056	0.0648021	0.344735	0.166226	1.55693	1.24007	1.25552	0.0142807	0.0245473	0.0965503
Q3U0V1	1.57964	1.27653	1.49458	1.45092	1.36243	1.50055	1.48475	1.50044	1.54487	1.45025	1.43797	1.51002	0.156341	0.0699619	0.0311878	0.991531	1.04121	0.952283	0.907144	0.551489	0.178584
P62754	1.57974	1.26115	1.77567	2.27917	2.20618	1.67304	1.69401	1.89441	1.7621	1.53885	2.0528	1.78351	0.259688	0.330897	0.1019	1.33398	1.15899	1.15099	0.101766	0.203376	0.249191
Q6ZWQ7	1.58437	1.32892	1.70436	2.20956	1.71474	1.70355	1.48809	1.43069	1.3392	1.53922	1.87595	1.41933	0.191751	0.288967	0.0750939	1.21877	0.92211	1.32172	0.167907	0.370321	0.0570427
Q9DCN2	1.58477	1.45458	1.50401	1.12749	1.20666	1.01346	1.50443	1.63553	1.33686	1.51445	1.11587	1.49227	0.0657208	0.0971224	0.149704	0.736816	0.985355	0.747766	0.00416229	0.825778	0.0217062
Q80UU9	1.58719	1.28097	1.1973	0.755761	1.09657	0.755917	0.816324	0.995817	0.687108	1.35515	0.869417	0.833083	0.205256	0.196722	0.155036	0.641564	0.614752	1.04361	0.0415873	0.0245525	0.813999
Q61235	1.58758	1.40368	1.51604	0.812175	1.00195	0.885108	1.09701	1.15238	1.02402	1.50243	0.899744	1.09114	0.092702	0.0957298	0.0643785	0.598859	0.726248	0.824594	0.00143403	0.00322203	0.0453072
Q99KC8	1.59226	1.52942	1.48079	1.03027	1.24192	1.27661	1.51247	1.5914	1.50809	1.53416	1.18293	1.53732	0.0558882	0.133348	0.0468837	0.771065	1.00206	0.769478	0.0136144	0.943713	0.0122286
O08788	1.59465	1.46783	1.52841	1.12306	1.20998	1.25712	1.41479	1.46444	1.34671	1.5303	1.19672	1.40865	0.0634307	0.068004	0.0591056	0.782018	0.920506	0.849553	0.0034154	0.0719616	0.0151729
P60843	1.5953	1.70938	1.8685	2.91445	3.26855	3.06207	3.56159	2.93671	3.33603	1.72439	3.08169	3.27811	0.137218	0.177867	0.316441	1.78712	1.90102	0.940081	0.000471209	0.00145588	0.401712
Q9DCJ9	1.59672	1.41115	1.611	1.25301	1.32268	1.62156	1.1117	1.81517	1.23226	1.53962	1.39908	1.38638	0.111487	0.195795	0.37621	0.908719	0.900465	1.00917	0.340766	0.535848	0.961099
Q9CWS0	1.59785	1.36084	1.30919	0.749966	1.1365	0.921746	1.44138	1.07195	1.08047	1.42263	0.936072	1.19794	0.153931	0.193666	0.210874	0.657988	0.84206	0.781404	0.027114	0.210314	0.188333
P06801	1.59999	2.02026	2.03181	1.1984	1.77575	1.24994	1.65319	1.66422	1.72032	1.88402	1.40803	1.67924	0.246045	0.319497	0.0360016	0.747353	0.89131	0.838489	0.110384	0.226925	0.217794
P63024	1.60063	1.28444	1.60997	1.49127	1.51429	1.4052	1.59142	1.32472	1.44323	1.49835	1.47026	1.45312	0.185303	0.0574991	0.133629	0.981252	0.969819	1.01179	0.814341	0.748975	0.848343
Q7TSF1	1.60082	1.42848	1.61017	1.17502	1.27552	1.28571	2.35113	1.5111	2.08646	1.54649	1.24542	1.9829	0.102305	0.0611795	0.429484	0.805317	1.28219	0.628079	0.0119238	0.162049	0.0422021
Q8R0W0	1.60464	1.52612	1.79165	1.11011	1.61495	1.23778	0.902232	1.09936	0.946498	1.6408	1.32095	0.982697	0.136408	0.262493	0.103431	0.805061	0.598913	1.3442	0.134397	0.00264226	0.10644
Q99020	1.61704	1.32124	1.53831	1.6331	1.60641	1.74066	1.22336	1.41682	1.58247	1.4922	1.66006	1.40755	0.1532	0.0710686	0.179731	1.11249	0.943273	1.1794	0.160255	0.568343	0.086402
Q8K354	1.62659	1.47075	1.51832	0.899565	1.05092	1.15948	1.45611	1.30377	1.30851	1.53855	1.03665	1.35613	0.0798638	0.130542	0.0866174	0.673786	0.881431	0.764423	0.00474031	0.0551214	0.0241864
Q08879	1.62874	1.06889	0.970191	1.03796	0.873239	1.02549	1.09313	0.838594	0.911862	1.22261	0.978895	0.947862	0.35517	0.0917129	0.131031	0.800662	0.77528	1.03274	0.313944	0.277138	0.753709
P68040	1.62905	1.79167	1.45022	1.92954	1.79573	2.05614	3.13461	2.21211	2.78563	1.62365	1.92714	2.71078	0.17079	0.130219	0.46578	1.18692	1.66956	0.710914	0.0706325	0.0191775	0.0484914
P47740	1.63017	1.51435	1.62075	1.58932	1.45244	1.40596	1.14214	1.25146	0.976321	1.58842	1.48257	1.12331	0.0643244	0.0953207	0.138532	0.933361	0.707183	1.31983	0.186087	0.00619339	0.0208265
P97807	1.63256	2.07806	2.15394	0.976846	1.2876	0.895565	1.40749	1.32874	1.34562	1.95485	1.05334	1.36062	0.281682	0.20691	0.0414616	0.538832	0.69602	0.774162	0.0110951	0.022457	0.0652102
P12815	1.63259	1.42263	1.51883	1.99351	1.96694	1.91909	1.53217	1.46258	1.52009	1.52468	1.95985	1.50495	0.105103	0.0377091	0.0371859	1.28541	0.987056	1.30227	0.00251136	0.774446	0.000118869
P61022	1.63666	1.68868	1.64219	1.79955	1.68637	1.89318	1.53971	1.66955	1.6427	1.65584	1.79303	1.61732	0.0285756	0.103556	0.0685383	1.08285	0.976735	1.10864	0.0914297	0.419683	0.0703865
Q91WJ8	1.63791	1.35416	1.44781	1.5168	1.68833	1.5833	1.36138	1.38128	1.43844	1.47996	1.59615	1.3937	0.144581	0.0864816	0.0399994	1.0785	0.941712	1.14526	0.298281	0.37562	0.0212034
P09055	1.63814	1.47179	1.6217	1.49392	1.76896	1.44621	1.86987	1.95153	1.75149	1.57721	1.5697	1.85763	0.0916659	0.174213	0.100577	0.995235	1.17779	0.844999	0.950453	0.0233934	0.0682708
P10833	1.63834	1.87226	1.94953	0.90095	1.34702	1.0103	1.50076	1.59092	1.26357	1.82004	1.08609	1.45175	0.162035	0.232492	0.169091	0.596739	0.797646	0.748125	0.0109403	0.0527788	0.0923351
P07901	1.64311	1.46134	1.53813	1.81275	1.94722	1.85975	1.647	1.71172	1.72592	1.54753	1.87324	1.69488	0.0912475	0.0682394	0.0420652	1.21047	1.09522	1.10523	0.00775436	0.0639715	0.0182442
Q9QZ85	1.64595	1.25556	1.46704	1.54755	2.17761	1.34769	0.836542	0.923837	1.12606	1.45618	1.69095	0.962147	0.195422	0.433143	0.148513	1.16122	0.660732	1.75748	0.440382	0.025209	0.051017
P62245	1.64769	1.83034	1.89678	2.42378	2.51311	2.29448	3.27186	2.434	3.59605	1.7916	2.41046	3.10064	0.128987	0.109925	0.599646	1.34542	1.73065	0.777408	0.00319774	0.0208989	0.121433
Q91X96	1.64847	1.16176	1.31746	1.26083	1.29997	1.14002	0.792604	0.85321	0.781964	1.3759	1.23361	0.809259	0.248558	0.08338	0.0384327	0.896583	0.588169	1.52436	0.400411	0.0175092	0.00132048
Q9JJZ2	1.64867	2.24292	2.1381	2.02277	2.02958	1.68126	2.46418	2.29717	2.29995	2.0099	1.9112	2.35377	0.317193	0.199168	0.0956297	0.950896	1.17109	0.811976	0.67178	0.146614	0.0255948
Q99K51	1.65228	1.76413	1.73302	1.77009	2.05827	1.97066	2.27717	1.91139	2.30446	1.71648	1.93301	2.16434	0.0577308	0.147736	0.219484	1.12614	1.26092	0.893115	0.0772899	0.026829	0.204478
P36536	1.65465	1.50525	1.51673	1.21895	1.22277	1.11932	1.66418	1.17238	1.32869	1.55888	1.18701	1.38842	0.0831403	0.0586518	0.251285	0.761453	0.890651	0.85494	0.00318739	0.327132	0.247796
O88844	1.65484	1.52068	1.45907	1.3358	1.41247	1.60952	1.64757	1.3787	1.63	1.54486	1.4526	1.55209	0.100102	0.141206	0.150416	0.940276	1.00468	0.935898	0.408113	0.9481	0.450553
Q9CR20	1.65602	1.77864	1.7415	1.85011	2.15155	1.497	1.42408	1.29904	1.57506	1.72538	1.83288	1.43273	0.0628762	0.327612	0.138212	1.06231	0.830381	1.2793	0.606501	0.0288807	0.123066
Q8BPB0	1.657	1.62405	1.67813	1.5325	1.7097	1.4999	1.7595	1.52179	1.71311	1.65306	1.5807	1.6648	0.0272552	0.112902	0.126004	0.956227	1.0071	0.949483	0.341273	0.882302	0.437796
P35486	1.65807	2.3622	2.25145	1.15315	1.27264	0.900834	1.32073	1.32001	1.05712	2.09057	1.10888	1.23262	0.378631	0.189817	0.151984	0.530417	0.589609	0.899609	0.0159363	0.0219213	0.427873
Q9CYZ2	1.65868	1.39564	1.64295	1.15473	1.24065	1.34651	1.53669	1.46184	1.38198	1.56576	1.2473	1.46017	0.147537	0.0960621	0.0773686	0.796612	0.932565	0.854216	0.0350826	0.333942	0.0403704
Q8BGD9	1.66016	1.28449	1.6571	0.83498	1.08077	0.898877	1.229	0.955412	1.089	1.53392	0.93821	1.09114	0.216016	0.127529	0.136808	0.611643	0.71134	0.859846	0.0146942	0.0399671	0.229651
Q9EQ06	1.6611	1.34573	1.36084	2.104	1.70929	1.99375	0.890676	1.09945	1.01342	1.45589	1.93568	1.00118	0.177877	0.203663	0.104921	1.32955	0.687676	1.9334	0.037175	0.0188808	0.00211742
P62743	1.66189	1.42304	1.27965	1.18848	1.78952	1.39866	1.53031	1.84578	1.63985	1.45486	1.45889	1.67198	0.193095	0.305014	0.160173	1.00277	1.14924	0.872549	0.98551	0.208248	0.344352
Q921H8	1.66819	1.81077	1.71219	1.4585	1.38044	1.44627	1.52161	1.94325	1.64836	1.73038	1.4284	1.70441	0.0730085	0.041986	0.216337	0.825483	0.984988	0.838064	0.00342045	0.853391	0.0958864
O08795	1.66971	1.22956	1.51775	1.22376	1.21907	1.43394	1.65357	1.4594	1.59628	1.47234	1.29225	1.56975	0.223561	0.122725	0.0997696	0.877689	1.06616	0.823222	0.288443	0.52859	0.0384436
P09405	1.67386	1.52908	1.91382	2.64964	2.76268	2.39663	2.20428	2.29105	2.02721	1.70559	2.60298	2.17418	0.194319	0.187429	0.13447	1.52615	1.27474	1.19722	0.00451481	0.0264245	0.0322901
Q91V92	1.67416	1.49444	1.52649	1.08526	1.23736	1.13284	1.30567	1.38769	1.41855	1.56503	1.15182	1.37064	0.0958594	0.0778036	0.0583433	0.735972	0.87579	0.840352	0.00440283	0.0399273	0.0175817
O35309	1.67442	1.0097	1.16232	1.29444	1.3472	1.14939	0.919925	0.903043	0.942821	1.28214	1.26368	0.921929	0.348184	0.102431	0.0199649	0.985597	0.719054	1.37069	0.934012	0.148132	0.00476615
P52825	1.6762	2.53331	2.43833	1.34957	1.17464	1.15388	1.68167	1.6684	1.40729	2.21595	1.22603	1.58579	0.46984	0.107489	0.154724	0.553276	0.715626	0.773136	0.0236413	0.0919843	0.0297244
Q8CAQ8	1.68013	2.20023	2.22056	1.16908	1.32877	0.919292	1.29941	1.38829	1.21776	2.03364	1.13905	1.30182	0.306318	0.206384	0.0852921	0.560102	0.640144	0.874962	0.0137502	0.0163144	0.275349
P27048	1.68204	1.53654	1.94531	3.01725	2.26824	2.85439	2.75999	2.48679	2.29583	1.7213	2.71329	2.5142	0.20719	0.393935	0.233287	1.57631	1.46065	1.07919	0.0181435	0.0116764	0.493241
P97370	1.68415	1.79259	1.55351	2.1142	1.92948	1.96597	1.96313	2.34284	1.81705	1.67675	2.00322	2.04101	0.119711	0.0978302	0.271411	1.1947	1.21724	0.981484	0.0216277	0.100562	0.831641
Q60931	1.69049	2.21716	2.09747	1.21291	1.53845	1.02825	1.24485	1.24183	1.23596	2.00171	1.25987	1.24088	0.276085	0.258322	0.00451982	0.629399	0.619913	1.0153	0.0273183	0.00882405	0.904846
P97384	1.6905	1.83512	1.88073	3.83377	2.78727	3.46382	1.64306	1.97113	1.61061	1.80212	3.36162	1.7416	0.0993185	0.53068	0.199436	1.86537	0.966419	1.93019	0.00747405	0.662533	0.007764
Q91YQ5	1.69233	1.48783	1.5267	1.59518	1.52061	1.46854	1.77111	1.77482	1.75687	1.56895	1.52811	1.7676	0.1086	0.0636545	0.00947544	0.973968	1.12661	0.864511	0.604134	0.0343079	0.00298154
Q9D0K2	1.69236	1.78168	1.9362	1.12365	1.26983	1.06984	1.43787	1.5633	1.41164	1.80341	1.15444	1.47094	0.123367	0.10349	0.0810578	0.640144	0.81564	0.784836	0.00221518	0.0175243	0.0140302
Q9WUM4	1.69738	1.36357	1.3155	1.41012	1.6207	1.56174	1.57997	1.59022	1.46545	1.45882	1.53085	1.54521	0.207998	0.108637	0.0692664	1.04938	1.05922	0.990707	0.623095	0.532354	0.856325
P62880	1.70094	1.46618	1.45137	1.94111	1.44462	1.89426	1.76933	1.54753	1.77386	1.5395	1.76	1.6969	0.140006	0.274129	0.129385	1.14323	1.10224	1.03718	0.282502	0.225909	0.7367
P97429	1.70461	1.51305	1.59	0.993607	1.43867	1.09736	1.08419	1.36404	1.02883	1.60255	1.17654	1.15902	0.0963939	0.232859	0.179701	0.734169	0.723233	1.01512	0.0429082	0.0196515	0.922773
O70503	1.70729	1.51993	1.52594	0.976928	0.851764	0.846835	1.00693	1.11447	0.946744	1.58439	0.891842	1.02272	0.106479	0.0737276	0.0849678	0.562894	0.645496	0.872034	0.000755695	0.00203361	0.114147
P47757	1.7094	1.80523	1.66693	2.59396	2.13402	2.25574	1.77185	1.72674	1.85854	1.72719	2.32791	1.78571	0.0708439	0.238306	0.0669822	1.3478	1.03388	1.30363	0.013861	0.357222	0.0192062
Q00519	1.71154	1.55219	1.50166	1.75324	2.08443	1.92119	1.27103	1.49213	1.32737	1.58846	1.91962	1.36351	0.109539	0.165596	0.114895	1.20848	0.858383	1.40785	0.044613	0.0701082	0.00878218
Q0VBK2	1.71746	1.80144	1.68719	1.25096	1.09861	1.59604	1.50705	1.51588	1.50938	1.73537	1.3152	1.51077	0.0591907	0.254864	0.00457457	0.757882	0.870577	0.870552	0.0497477	0.00280473	0.254632
Q9JJU8	1.72679	1.32219	1.41951	1.17389	1.85869	1.63569	1.06597	1.51338	1.84117	1.4895	1.55609	1.47351	0.211183	0.349273	0.389136	1.04471	0.989267	1.05604	0.7915	0.953131	0.797975
O35887	1.72865	1.14744	1.33957	0.85105	0.933522	0.983381	1.60691	1.16732	1.27996	1.40522	0.922651	1.3514	0.296114	0.066832	0.228335	0.656587	0.961695	0.682739	0.0511936	0.815385	0.0354814
A0A140T8Q4	1.73086	1.14041	1.09201	2.37305	2.27391	2.46072	0.990183	1.55452	1.58368	1.32109	2.36923	1.37613	0.355691	0.0934625	0.334556	1.79339	1.04166	1.72166	0.00783706	0.854737	0.00775105
P45377	1.73222	1.68317	1.53015	1.42703	1.60789	1.72579	2.37259	2.19217	2.34313	1.64851	1.5869	2.30263	0.105398	0.15048	0.0967836	0.962628	1.39679	0.689171	0.592512	0.00137704	0.00227775
Q9D7N9	1.73365	1.95437	1.94172	2.07176	1.47382	1.79944	1.18132	1.51557	1.13236	1.87658	1.78167	1.27642	0.123939	0.299369	0.208551	0.949425	0.680183	1.39584	0.638607	0.0127979	0.0744692
P26443	1.73435	1.64735	1.73612	1.21625	1.62501	1.27409	1.3569	1.39933	1.38828	1.70594	1.37178	1.3815	0.0507446	0.221199	0.022009	0.804121	0.809821	0.992961	0.0632853	0.00052861	0.943242
P62874	1.74397	1.05445	1.23575	0.947939	1.10852	1.31294	1.05078	0.95764	1.09294	1.34472	1.12313	1.03379	0.357444	0.182939	0.069234	0.835215	0.768775	1.08642	0.393282	0.21318	0.473132
Q76MZ3	1.74425	1.81156	1.75988	1.83654	1.84801	1.81288	1.79017	1.72884	1.57399	1.7719	1.83248	1.69766	0.035227	0.0179148	0.111411	1.03419	0.958106	1.07941	0.0566818	0.332945	0.107316
Q91WV0	1.74573	1.42898	1.70267	1.33734	1.39379	1.53104	1.26536	1.38538	1.45298	1.62579	1.42073	1.3679	0.171803	0.099619	0.095021	0.873866	0.841375	1.03862	0.148209	0.0852408	0.542678
P62075	1.74627	1.88124	1.85595	1.38018	1.67246	1.49242	1.04413	1.63844	1.58633	1.82782	1.51502	1.42297	0.0717475	0.147443	0.329114	0.828866	0.778506	1.06469	0.0298178	0.105814	0.681269
Q02819	1.75703	1.18731	1.34516	0.94309	1.23127	1.06226	1.25487	1.20629	1.25645	1.42983	1.07887	1.2392	0.29415	0.144804	0.0285163	0.754544	0.866678	0.870617	0.137338	0.326463	0.133029
P62821	1.75766	1.56095	1.61439	1.60737	1.8654	1.72255	1.94681	1.87439	2.02503	1.64433	1.73177	1.94874	0.101717	0.12926	0.0753354	1.05318	1.18513	0.888661	0.409268	0.0140824	0.0659256
P42932	1.75913	1.70947	1.88227	2.40774	2.41075	2.26359	2.70616	2.32077	2.50013	1.78362	2.36069	2.50902	0.0889653	0.0841078	0.192846	1.32354	1.4067	0.940882	0.00122546	0.00408825	0.289093
Q6ZWM4	1.76194	1.53634	1.48276	1.16593	1.73943	1.57361	0.743598	0.986554	0.903206	1.59368	1.49299	0.877786	0.148156	0.295126	0.123457	0.936818	0.550792	1.70086	0.625349	0.00300905	0.0290829
P31428	1.76398	1.90732	1.88164	0.792016	0.999236	1.08057	1.4692	1.25285	1.02889	1.85098	0.957276	1.25031	0.0764315	0.148785	0.220165	0.517172	0.675487	0.765629	0.000758083	0.0111248	0.128735
Q61739	1.7643	1.5975	1.84757	1.05672	1.39369	1.13727	1.00718	1.14607	0.901016	1.73646	1.19589	1.01809	0.127342	0.175973	0.12289	0.688697	0.586302	1.17465	0.0125419	0.00215622	0.224656
Q9R1P3	1.76475	1.7045	1.80583	1.788	2.12197	1.91738	1.76441	1.71941	1.58522	1.75836	1.94245	1.68968	0.0509629	0.168389	0.0932219	1.10469	0.960941	1.1496	0.144151	0.325546	0.0852866
Q07813	1.7659	1.70179	1.74617	1.65281	1.63606	1.57914	1.87837	1.9658	1.50641	1.73795	1.62267	1.78353	0.0328369	0.0386174	0.243936	0.933667	1.02622	0.909808	0.0169724	0.76448	0.322349
Q8R1F1	1.76782	1.69099	2.01619	1.63132	1.90211	1.7664	1.88431	1.91884	1.82148	1.825	1.76661	1.87488	0.169975	0.135396	0.0493624	0.968006	1.02733	0.942252	0.665861	0.651013	0.263058
Q9DBJ1	1.77039	1.57846	1.95812	3.07528	2.82559	3.08819	2.25329	2.02111	2.34978	1.76899	2.99636	2.20806	0.189836	0.148028	0.168937	1.69382	1.2482	1.35701	0.000907562	0.0402335	0.00370127
E9Q3E1	1.77153	1.65068	1.57817	1.49835	0.964722	1.50315	2.00971	1.72323	2.10477	1.66679	1.32207	1.94591	0.0976781	0.309485	0.19861	0.793184	1.16745	0.679413	0.139633	0.0942983	0.0424611
P55065	1.7726	1.29573	1.02334	0.957301	1.55464	1.12831	1.37608	1.07859	1.58744	1.36389	1.21342	1.34737	0.379255	0.307632	0.255635	0.889673	0.987889	0.90058	0.621824	0.953122	0.592976
A0A075B663	1.77563	1.55047	1.2123	1.85514	1.85179	1.93658	1.2894	2.2305	2.12959	1.5128	1.88117	1.88316	0.283547	0.0480168	0.516684	1.2435	1.24482	0.998941	0.0907523	0.337592	0.995007
Q64133	1.77809	1.73269	1.92905	1.20727	1.24548	1.12237	1.35304	1.6996	1.42359	1.81328	1.19171	1.49208	0.102797	0.063014	0.18315	0.657211	0.822861	0.79869	0.000869928	0.0570472	0.0548818
P84091	1.78237	1.53543	1.48684	1.68778	1.81761	1.82106	1.88511	2.40953	1.89135	1.60155	1.77548	2.062	0.15847	0.0759758	0.300989	1.10861	1.2875	0.861051	0.16163	0.0789823	0.185153
P28271	1.78357	1.69231	1.76173	0.840446	1.09244	1.00604	1.18279	1.23501	1.06438	1.74587	0.979645	1.16072	0.047657	0.128057	0.0874306	0.561121	0.66484	0.843994	0.000629036	0.00052483	0.113145
Q02053	1.78695	1.69347	1.82288	2.0485	1.95913	2.04617	2.07034	1.80255	1.97026	1.76777	2.01793	1.94772	0.0668033	0.0509386	0.13531	1.14151	1.10179	1.03605	0.00670867	0.107785	0.447625
P50396	1.79284	1.89246	2.02304	1.54641	1.23949	1.61853	1.3267	1.3131	1.32299	1.90278	1.46815	1.32093	0.115445	0.201276	0.00702763	0.771579	0.69421	1.11145	0.0315423	0.00095537	0.2742
P35278	1.79376	1.6007	1.59347	2.6491	2.37916	2.48696	1.88435	2.19911	2.07992	1.66265	2.50507	2.05446	0.11361	0.135874	0.158916	1.50668	1.23566	1.21933	0.00118382	0.0254904	0.0202465
P49722	1.79494	1.4369	1.59025	1.98617	2.13773	2.15728	1.88719	1.81274	2.04074	1.60736	2.09372	1.91356	0.179633	0.0936587	0.116268	1.30258	1.19049	1.09415	0.0141649	0.0683219	0.104813
Q6PDM2	1.79831	1.75404	1.78892	1.70181	1.81466	1.59162	2.24574	1.97573	2.03124	1.78042	1.7027	2.08423	0.0233287	0.111524	0.142592	0.956345	1.17064	0.816942	0.302834	0.0219272	0.0217613
P02469	1.80261	1.40822	1.46569	0.882554	1.13193	0.87648	1.22064	0.896913	0.978093	1.55884	0.963654	1.03188	0.213061	0.145761	0.168433	0.618186	0.661954	0.93388	0.016219	0.0282898	0.623831
Q61247	1.80499	1.49194	1.29452	2.21204	2.46947	2.03225	1.81578	2.00001	2.3896	1.53048	2.23792	2.06846	0.25741	0.219759	0.292968	1.46223	1.35151	1.08192	0.0223517	0.0752228	0.467793
Q8CDN6	1.80846	1.63143	1.85329	1.75111	2.08859	1.922	2.02389	2.04891	2.03847	1.7644	1.92057	2.03709	0.11731	0.168745	0.0125687	1.08851	1.15455	0.942801	0.258459	0.0160853	0.298906
P01901	1.80885	1.7373	1.77963	1.90472	1.72312	1.608	1.03768	1.62729	1.38772	1.77526	1.74528	1.3509	0.0359758	0.149595	0.296527	0.98311	0.760956	1.29194	0.752683	0.0696364	0.108856
P58252	1.80887	2.13734	2.0844	2.86447	2.64618	2.85319	4.40185	3.18498	3.972	2.01021	2.78794	3.85295	0.176356	0.122901	0.617109	1.38689	1.91669	0.723588	0.00330846	0.00763536	0.042746
Q61598	1.81016	1.67451	1.70973	2.06309	1.71885	2.0183	2.26618	2.02893	2.19346	1.73146	1.93342	2.16285	0.0703901	0.187161	0.121549	1.11664	1.24915	0.893919	0.155142	0.0060071	0.149556
P28652	1.81182	2.28758	2.11562	1.18059	1.32338	1.15795	1.60413	1.85472	1.3093	2.07167	1.22064	1.58938	0.240908	0.0896922	0.27301	0.589204	0.767198	0.767995	0.00458119	0.0834638	0.0903557
Q8K4L4	1.81682	1.40022	1.84988	0.930268	1.06004	1.07659	1.23077	1.19077	1.04319	1.68897	1.0223	1.15491	0.250611	0.0801269	0.0987978	0.605276	0.683796	0.885171	0.0117941	0.0264423	0.145264
Q64727	1.81984	1.83681	1.83758	2.34065	1.8677	2.2813	1.91081	1.72397	1.92969	1.83141	2.16322	1.85482	0.0100282	0.257642	0.113714	1.18118	1.01279	1.16626	0.0897146	0.740308	0.130737
P12970	1.82351	1.44976	2.3153	2.09157	2.76517	1.63008	1.96962	3.0611	2.02799	1.86286	2.16228	2.3529	0.434108	0.570839	0.61401	1.16073	1.26306	0.918983	0.50961	0.322116	0.713801
Q9R0P6	1.82449	1.67943	1.77686	1.85616	1.52319	1.58087	1.52001	1.88178	1.68403	1.76026	1.6534	1.69527	0.0739409	0.177942	0.181148	0.939298	0.963082	0.975304	0.391215	0.595912	0.789381
P63028	1.83137	1.90812	2.10131	2.18244	2.40979	2.65096	3.47585	2.85097	3.15799	1.94694	2.41439	3.16161	0.139091	0.234296	0.312454	1.2401	1.62389	0.763661	0.0410814	0.00354295	0.0295468
Q9CQA3	1.83834	2.49755	2.51527	1.50362	1.54506	1.09858	1.39979	1.71485	1.21242	2.28372	1.38242	1.44235	0.385815	0.246686	0.253907	0.605336	0.631581	0.958446	0.0270529	0.0343419	0.783919
P61027	1.8387	1.27998	1.52433	1.46817	0.956679	1.1672	1.3929	1.40451	1.37485	1.54767	1.19735	1.39075	0.280091	0.257076	0.0149501	0.773649	0.898613	0.860936	0.185726	0.387439	0.263186
P38647	1.84018	1.89394	1.9467	1.67351	1.81749	1.59002	1.88558	1.94625	1.79019	1.8936	1.69367	1.87401	0.053261	0.11507	0.0786664	0.894419	0.98965	0.903773	0.0523886	0.73891	0.0885453
P24452	1.84041	1.50424	1.62069	2.20992	1.90152	2.36573	1.64199	1.75147	1.82149	1.65512	2.15906	1.73832	0.170707	0.236245	0.0904691	1.30448	1.05027	1.24204	0.0401515	0.497163	0.0449821
P49817	1.84566	1.58879	1.77168	1.08546	1.37635	1.12343	1.66731	1.74241	1.31438	1.73537	1.19508	1.5747	0.132228	0.15813	0.228546	0.688658	0.907412	0.758926	0.0104975	0.351341	0.0771664
P97461	1.84684	2.39662	2.07412	2.87221	2.34387	2.5599	3.57721	3.04308	3.2036	2.10586	2.592	3.27463	0.27626	0.265629	0.274058	1.23085	1.55501	0.791539	0.0929595	0.0065064	0.036295
O08585	1.86376	1.2661	1.32714	1.56195	1.70394	1.9889	1.70177	2.14273	2.03227	1.48567	1.7516	1.95892	0.328862	0.217429	0.22945	1.179	1.31855	0.894163	0.307552	0.110417	0.319396
P55097	1.86991	1.58435	1.56027	2.69605	3.98838	2.61829	1.24833	1.89076	1.55122	1.67151	3.10091	1.56344	0.172238	0.769557	0.321385	1.85515	0.935345	1.98339	0.0348649	0.634756	0.0331172
P50247	1.87048	1.89382	1.76537	1.53772	2.00118	1.65661	1.78534	1.58433	1.77211	1.84322	1.73184	1.71393	0.0684259	0.240713	0.112431	0.939569	0.929852	1.01045	0.483751	0.164057	0.912674
Q61033	1.87558	1.39085	1.80591	1.78845	1.98619	1.84057	1.37843	1.36644	1.48277	1.69078	1.87174	1.40921	0.262074	0.10249	0.0639828	1.10703	0.833471	1.32821	0.327767	0.144924	0.00268419
Q6WVG3	1.87736	1.66881	1.74722	1.90162	1.85315	1.81986	1.07787	1.22235	1.33093	1.76446	1.85821	1.21038	0.105338	0.0411107	0.126953	1.05313	0.685977	1.53523	0.224346	0.00434637	0.00109491
P61971	1.88115	2.22578	1.91013	0.905211	1.45714	1.321	1.25886	1.14315	1.39737	2.00568	1.22778	1.26646	0.191157	0.287528	0.127283	0.612151	0.631434	0.969461	0.017507	0.00507297	0.841714
A2A863	1.88143	1.52443	1.80413	0.979957	1.42264	1.09745	0.874435	1.05628	0.898165	1.73667	1.16668	0.942961	0.187816	0.22932	0.0988554	0.671795	0.542973	1.23725	0.02909	0.002928	0.195674
P63242	1.88391	1.86557	1.91087	2.67321	2.63391	2.85657	2.50072	2.25972	2.41665	1.88679	2.72123	2.39236	0.0227854	0.118842	0.122323	1.44226	1.26796	1.13747	0.000281529	0.00214842	0.0288374
Q9CWJ9	1.88975	1.98214	2.12661	1.98507	2.15713	2.21747	2.28794	2.15287	2.26207	1.9995	2.11989	2.23429	0.119382	0.120593	0.0716906	1.06021	1.11743	0.948798	0.28648	0.043228	0.2307
Q9CY27	1.89058	2.09747	1.85892	1.28874	1.14042	0.982413	1.42116	1.58934	1.41464	1.94899	1.13719	1.47504	0.12956	0.153189	0.0990341	0.583477	0.756825	0.770954	0.00218245	0.0073136	0.0326519
O88736	1.89211	1.83452	1.77229	1.17202	1.05764	0.956334	1.48121	1.51873	1.50803	1.83297	1.062	1.50266	0.0599233	0.107909	0.0193282	0.579386	0.819792	0.706747	0.000414097	0.000813321	0.00223703
P62908	1.89279	2.08291	2.10128	2.51792	2.51757	2.59281	3.97328	3.25704	3.65301	2.02566	2.54277	3.62777	0.115436	0.0433386	0.358787	1.25528	1.79091	0.700917	0.00190772	0.00181313	0.00651571
Q9CQ62	1.89479	2.16708	2.26378	1.06281	1.46023	0.911767	1.29823	1.33193	1.1523	2.10855	1.14494	1.26082	0.191334	0.283305	0.0954811	0.542997	0.597955	0.90809	0.00814799	0.00235585	0.538769
P61166	1.89782	1.57302	1.45481	1.87175	1.501	1.45678	1.73905	1.80701	2.29516	1.64188	1.60985	1.94707	0.229392	0.227894	0.30336	0.980488	1.18588	0.826804	0.872081	0.236921	0.19854
Q01853	1.89856	1.74179	1.97851	2.07612	2.1204	2.15419	2.44713	2.22249	2.36376	1.87295	2.1169	2.34446	0.120422	0.0391481	0.113555	1.13025	1.25174	0.90294	0.0289195	0.00785023	0.0304622
Q61990	1.89927	1.82505	1.81474	2.31262	2.56381	2.32383	2.3777	2.08902	2.05339	1.84635	2.40009	2.17337	0.0461186	0.1419	0.177849	1.29991	1.17712	1.10431	0.00301187	0.0368291	0.159446
P35293	1.90143	1.88613	2.12416	1.36772	1.79997	1.34509	1.5981	1.52932	1.69967	1.97057	1.50426	1.60903	0.133229	0.25634	0.085698	0.763363	0.816529	0.934887	0.0490242	0.0167749	0.538758
P84099	1.9106	1.79687	2.43085	2.6917	3.23293	2.63555	2.68522	2.80966	2.48901	2.04611	2.85339	2.6613	0.338016	0.329884	0.161657	1.39455	1.30066	1.07218	0.0415357	0.0466854	0.416328
Q06185	1.91322	3.19169	2.12707	1.79511	1.72456	1.58691	2.23173	1.9088	2.13845	2.41066	1.7022	2.09299	0.684794	0.105885	0.166195	0.706112	0.868224	0.813283	0.151285	0.47854	0.0264167
Q9CZB0	1.92325	2.91682	2.74885	1.33866	1.54251	1.23225	2.2178	1.74068	1.5878	2.52964	1.37114	1.84876	0.531818	0.157657	0.32861	0.542029	0.730838	0.741654	0.0224077	0.132291	0.0857513
Q9D8N0	1.9248	1.97612	1.99953	2.35324	2.49079	2.37924	3.85655	2.95166	3.49559	1.96682	2.40776	3.4346	0.0382257	0.0730739	0.455518	1.22419	1.74627	0.701029	0.000755995	0.00511825	0.018222
P24270	1.93829	2.13092	1.95939	1.52148	1.95956	1.92398	1.59804	2.01898	1.71714	2.00953	1.80167	1.77806	0.105652	0.243307	0.21698	0.896563	0.884811	1.01328	0.246225	0.17199	0.906203
P62311	1.93914	1.45787	1.62099	1.53353	1.65143	1.76069	1.25811	1.37876	1.40557	1.67267	1.64855	1.34748	0.244762	0.113609	0.0785458	0.985583	0.805588	1.22343	0.884489	0.0935755	0.0195102
Q68FD5	1.94169	1.76303	1.76295	1.95597	1.98314	2.04143	2.18383	2.35481	2.14288	1.82255	1.99351	2.22717	0.103171	0.0436651	0.112416	1.0938	1.22201	0.895087	0.0573935	0.0100837	0.0284142
P17225	1.94242	2.01853	2.15058	2.65475	2.70624	2.6703	2.93699	2.48338	2.6764	2.03718	2.6771	2.69892	0.105326	0.0264133	0.227642	1.31412	1.32484	0.991912	0.000519081	0.0102639	0.876964
Q9JHJ0	1.94386	1.34359	1.53811	2.15551	1.72634	2.19609	1.58932	1.47489	1.59064	1.60852	2.02598	1.55162	0.306265	0.260287	0.0664519	1.25953	0.964625	1.30572	0.146412	0.768872	0.0377139
P59017	1.94507	1.59972	1.76453	1.12485	1.24907	0.884783	0.984903	1.09201	1.02813	1.76977	1.08624	1.03502	0.172734	0.185189	0.0538862	0.613771	0.58483	1.04949	0.00948269	0.00215346	0.669425
P47915	1.95141	1.24965	2.04294	2.53077	2.44384	2.52442	2.21527	2.23813	2.77136	1.748	2.49968	2.40825	0.434003	0.0484606	0.314666	1.43002	1.37772	1.03796	0.0406863	0.0998396	0.645033
Q8CI94	1.95201	1.78878	1.84076	0.966486	1.22921	0.991845	1.59231	1.22322	1.40888	1.86051	1.06251	1.40813	0.0833886	0.144917	0.184544	0.571085	0.756852	0.754553	0.00116837	0.0180062	0.0632216
O08749	1.95294	2.40138	2.45801	1.18618	1.46027	1.09406	1.37459	1.41798	1.22248	2.27078	1.24684	1.33835	0.276703	0.190488	0.102663	0.54908	0.58938	0.931624	0.00617269	0.00542667	0.504485
O09061	1.96122	1.97848	2.02636	2.37232	2.48937	2.50382	2.28612	2.25681	2.24828	1.98869	2.45517	2.26374	0.0337485	0.0721161	0.0198437	1.23457	1.13831	1.08457	0.000530994	0.000261748	0.0113955
P61620	1.96731	1.73103	1.77518	2.00956	1.75487	1.79098	2.40609	2.21391	2.46375	1.82451	1.8518	2.36125	0.125628	0.137811	0.130815	1.01496	1.29419	0.784246	0.812361	0.00685839	0.00970578
Q62318	1.97026	1.59419	1.70213	1.4335	1.60265	1.4713	1.73909	1.70067	1.69794	1.75553	1.50248	1.71257	0.193635	0.0887854	0.0230077	0.855859	0.975528	0.877329	0.108762	0.722167	0.0165758
P21619	1.97771	1.49321	1.779	1.20481	1.07187	1.24093	0.926512	1.06463	0.816263	1.74997	1.17254	0.935801	0.243555	0.0890287	0.124444	0.670031	0.534752	1.25298	0.0181956	0.00671664	0.0552409
P29758	1.98141	2.01893	2.12099	1.41749	1.59482	1.55767	1.85108	1.70101	1.81725	2.04044	1.52333	1.78978	0.0722307	0.093523	0.078715	0.746567	0.877152	0.851126	0.00162472	0.0152989	0.0195129
Q9CQQ7	1.98498	2.97442	3.07945	1.70058	1.66082	1.2936	2.08719	2.00659	1.83526	2.67962	1.55167	1.97635	0.603858	0.224374	0.12866	0.579064	0.737548	0.78512	0.0386775	0.11977	0.0466828
Q8BFZ9	1.98501	1.70663	1.62289	1.50718	1.60306	1.42182	1.37911	1.62333	1.54009	1.77151	1.51068	1.51418	0.189576	0.0906701	0.124158	0.852767	0.854737	0.997694	0.0980053	0.120605	0.970512
Q99JI6	1.993	2.03217	1.7642	2.588	2.2226	2.86675	1.66127	2.07681	1.90191	1.92979	2.55912	1.88	0.144735	0.323046	0.208633	1.32611	0.974197	1.36123	0.0369578	0.7512	0.037705
P68510	2.00568	1.71706	1.88021	2.24073	2.01699	2.31065	2.18802	2.00115	2.12608	1.86765	2.18946	2.10508	0.14472	0.153398	0.0951908	1.17231	1.12713	1.04008	0.0573989	0.0764764	0.463631
P35564	2.01099	1.62158	1.76681	1.93258	1.79917	1.75785	1.95262	2.07163	2.01106	1.79979	1.82986	2.01177	0.196788	0.09132	0.059506	1.01671	1.11778	0.90958	0.822071	0.148667	0.0445364
P05202	2.01205	3.13435	2.8503	1.47672	1.75475	1.46324	2.10974	1.66856	1.68216	2.66557	1.5649	1.82015	0.583513	0.164547	0.250885	0.587081	0.68284	0.859765	0.0346977	0.0824487	0.21461
Q9WV55	2.01428	2.33183	2.43196	2.46142	2.51582	2.27481	2.02614	2.68672	2.04458	2.25936	2.41735	2.25248	0.218067	0.126404	0.376174	1.06993	0.996956	1.0732	0.338668	0.979457	0.511579
P16546	2.0156	1.56369	1.72551	1.01533	1.14694	1.10661	1.18028	1.08494	1.02119	1.76827	1.08963	1.09547	0.228968	0.0674272	0.0800639	0.616213	0.619518	0.994666	0.00790373	0.00862183	0.927627
Q9R269	2.01721	1.51946	1.89031	1.08964	1.38896	1.25449	1.36902	1.36159	1.30487	1.80899	1.24436	1.34516	0.258647	0.149918	0.0350916	0.687876	0.743595	0.925068	0.0307515	0.037007	0.320191
Q9DBH5	2.02805	1.58242	1.81237	1.61895	1.55699	1.6146	1.72489	1.7626	1.72582	1.80761	1.59685	1.73777	0.222852	0.0345851	0.0215038	0.883403	0.961363	0.918907	0.180821	0.617665	0.00389815
Q61206	2.0284	1.79442	1.73984	1.33758	1.66551	1.87436	1.76006	1.75931	1.84799	1.85422	1.62582	1.78912	0.153292	0.270586	0.0509809	0.876821	0.964893	0.908723	0.272272	0.523665	0.362357
Q6IRU5	2.02903	1.41325	1.66408	1.1861	1.39369	1.24884	1.6372	1.83244	1.54968	1.70212	1.27621	1.67311	0.309647	0.106465	0.144763	0.749775	0.982954	0.762777	0.0873593	0.890226	0.0186885
Q9JM14	2.03779	1.65733	1.77893	1.40196	1.41387	1.79294	1.66341	1.68241	1.69033	1.82468	1.53626	1.67872	0.194316	0.222375	0.0138324	0.841932	0.920005	0.915139	0.165972	0.264139	0.330211
O70435	2.03954	2.0378	2.29238	2.4697	2.50185	2.60892	2.79268	2.23875	2.66028	2.12324	2.52683	2.5639	0.146485	0.0728924	0.289265	1.19008	1.20754	0.985539	0.0129263	0.0781766	0.840086
Q9DCX2	2.04779	2.3606	2.4584	1.41248	1.68298	1.11477	1.22163	1.54865	1.24635	2.28893	1.40341	1.33888	0.214483	0.284215	0.182087	0.61313	0.584935	1.0482	0.0125701	0.00426264	0.75715
Q9CR09	2.04984	1.84091	1.50987	1.80059	1.83891	2.01131	2.25312	2.50647	2.43241	1.8002	1.8836	2.39734	0.272279	0.112245	0.130266	1.04633	1.3317	0.785706	0.649492	0.0266194	0.00663039
Q9QZQ8	2.04998	1.53583	2.10296	2.55743	2.39434	2.16961	1.26448	1.73492	1.21403	1.89626	2.37379	1.40448	0.313263	0.194724	0.287282	1.25183	0.740658	1.69016	0.0883846	0.115589	0.008415
Q9DB77	2.05669	3.19989	3.04523	1.51552	1.72232	1.13963	1.8205	1.78313	1.60186	2.76727	1.45915	1.73516	0.620215	0.295407	0.116946	0.527291	0.627029	0.840934	0.0299862	0.047229	0.206855
Q8CHH9	2.0602	1.74807	1.70585	0.943663	1.37896	1.08902	1.32545	1.33124	1.29234	1.83804	1.13721	1.31634	0.193548	0.221614	0.02099	0.61871	0.716167	0.863919	0.0145469	0.00972363	0.235832
P62301	2.06135	2.18976	2.0708	2.70573	2.57178	2.87423	2.60374	2.7065	2.73235	2.1073	2.71725	2.68086	0.0715663	0.151553	0.06803	1.28944	1.27218	1.01357	0.0032381	0.000548926	0.723703
P51174	2.06155	2.79708	2.84187	1.55743	1.794	1.35059	1.47208	1.64903	1.23909	2.56683	1.56734	1.4534	0.438163	0.221866	0.205608	0.610612	0.566224	1.07839	0.0243431	0.0163396	0.549729
Q9WVA4	2.06277	2.04433	2.00804	2.9266	2.87708	3.31743	3.18864	2.68275	3.6916	2.03838	3.04037	3.18766	0.0278439	0.24121	0.504427	1.49156	1.56382	0.953794	0.00202715	0.0169558	0.671874
Q8BFR5	2.06754	2.36888	2.29421	1.43941	1.56484	1.51671	1.83182	1.8695	1.76431	2.24354	1.50699	1.82188	0.156931	0.0632759	0.053297	0.6717	0.812053	0.827162	0.00165759	0.0116302	0.00274222
Q99L47	2.07102	1.7397	1.93057	1.06258	1.33872	1.32621	1.49886	1.51281	1.50184	1.91376	1.2425	1.5045	0.166301	0.155941	0.00734795	0.649248	0.786151	0.825857	0.00698331	0.0130711	0.0438171
Q99KJ8	2.07135	1.75353	1.86453	1.41173	1.44892	1.56359	1.70235	1.62514	1.69701	1.89647	1.47475	1.67484	0.161301	0.0791527	0.0431186	0.777625	0.883132	0.880532	0.0152804	0.0830101	0.0183817
O55022	2.08333	1.60078	2.12628	1.02186	1.31587	0.985186	1.10847	1.31641	1.03433	1.9368	1.10764	1.15307	0.291793	0.181261	0.146234	0.571891	0.595349	0.960597	0.0139092	0.014156	0.752431
Q8BH61	2.08397	1.89693	1.69404	2.05942	2.39674	2.3822	1.95277	2.60883	2.36959	1.89164	2.27945	2.3104	0.195016	0.190694	0.33201	1.20501	1.22137	0.986607	0.0694919	0.132717	0.895439
Q62426	2.08943	2.08425	2.3568	2.21101	2.38424	2.58563	2.07346	2.43162	2.64017	2.17683	2.39363	2.38175	0.155888	0.187485	0.286626	1.09959	1.09414	1.00499	0.198386	0.337818	0.954989
P02468	2.09058	1.96	2.29638	1.01268	1.47848	0.910131	1.08856	1.30878	0.940534	2.11565	1.13376	1.11262	0.169582	0.302902	0.185298	0.535892	0.525901	1.019	0.00804917	0.00229297	0.922843
Q62261	2.09633	1.73156	1.85713	1.1391	1.27144	1.18878	1.22933	1.18385	1.09448	1.89501	1.19978	1.16922	0.18531	0.066851	0.0686047	0.633124	0.617	1.02613	0.00362645	0.00312953	0.610011
P63330	2.10101	2.16433	2.5693	2.2271	2.19244	2.27477	1.93823	1.95047	1.87293	2.27821	2.23144	1.92054	0.254071	0.0413352	0.04169	0.979468	0.843004	1.16188	0.768689	0.0738633	0.000784509
Q8BMF4	2.10471	2.98345	2.9644	1.33844	1.70898	1.1033	1.55305	1.65559	1.3154	2.68419	1.38358	1.50801	0.501933	0.305353	0.174512	0.515454	0.561814	0.917483	0.0185496	0.0185609	0.573124
P54728	2.11119	1.8363	2.17467	1.4779	1.6227	1.65859	2.38007	2.11795	2.10697	2.04072	1.5864	2.20166	0.179859	0.0956595	0.154606	0.777371	1.07887	0.720545	0.0181041	0.305042	0.00422861
P09803	2.11372	1.6481	2.095	1.37333	1.57232	1.54574	1.53315	1.44816	1.43073	1.95227	1.49713	1.47068	0.263588	0.108032	0.0547979	0.766865	0.753317	1.01798	0.050467	0.0362798	0.724512
P10605	2.11916	1.32934	1.39194	1.44532	1.64595	2.11344	1.67983	1.87661	1.66009	1.61348	1.7349	1.73884	0.43905	0.342832	0.119716	1.07525	1.0777	0.997734	0.724949	0.658169	0.985907
Q01730	2.12488	2.06155	1.84504	3.1419	2.17501	3.10481	2.21143	2.1186	2.36714	2.01049	2.80724	2.23239	0.146743	0.547843	0.125588	1.3963	1.11037	1.2575	0.071732	0.117464	0.151179
Q8BFQ8	2.13776	1.81998	1.62827	1.691	1.71733	2.00074	1.39653	1.58198	1.59561	1.862	1.80302	1.5247	0.257333	0.171733	0.111214	0.968323	0.818851	1.18254	0.757809	0.105545	0.077992
P99026	2.13839	2.07035	2.41307	3.07738	2.50205	3.34787	2.90453	2.79721	3.03253	2.20727	2.97577	2.91142	0.181447	0.431969	0.117816	1.34817	1.31902	1.0221	0.0468214	0.00487277	0.815688
Q91VI7	2.14453	1.71568	1.83782	1.95899	2.54968	2.29314	2.45272	2.45349	2.24103	1.89934	2.26727	2.38241	0.220947	0.296196	0.12244	1.19371	1.25433	0.951669	0.159698	0.0295911	0.567492
Q9Z2U1	2.14543	1.94587	2.05062	2.14527	2.28985	2.31525	2.12811	2.11904	2.00548	2.04731	2.25012	2.08421	0.0998196	0.0916889	0.0683295	1.09907	1.01803	1.07961	0.060568	0.625168	0.0658396
Q9D1A2	2.1479	1.70454	1.79946	1.49911	2.10574	1.98072	1.6349	2.09011	2.0221	1.88397	1.86186	1.9157	0.233445	0.320305	0.245547	0.988264	1.01684	0.971894	0.927673	0.878994	0.828597
Q9Z1N5	2.1537	2.04521	2.51255	2.91673	2.83655	2.85737	2.58612	2.25209	2.8907	2.23715	2.87022	2.5763	0.244587	0.0416038	0.31942	1.28298	1.1516	1.11408	0.0115147	0.218034	0.18917
P49182	2.15582	1.60715	1.40113	3.0733	2.78309	2.23826	1.46373	1.99132	1.78886	1.72137	2.69822	1.74797	0.390092	0.42394	0.26616	1.56749	1.01546	1.54363	0.0425209	0.926958	0.0302717
Q61508	2.15793	1.4231	1.42985	2.86459	2.7842	3.22756	2.07171	1.98624	2.12262	1.67029	2.95878	2.06019	0.422319	0.236211	0.0689173	1.77142	1.23343	1.43617	0.00994023	0.189662	0.00319672
O55137	2.17529	2.05225	2.13237	0.994743	1.44796	1.03457	1.37033	1.09518	1.18522	2.11997	1.15909	1.21691	0.0624526	0.25096	0.140285	0.546749	0.574023	0.952485	0.00299901	0.000523285	0.745147
Q07076	2.17796	2.13958	2.01656	2.40591	2.45592	2.41674	2.3794	2.45414	2.2752	2.11137	2.42619	2.36958	0.0843184	0.0263094	0.0898736	1.14911	1.1223	1.02389	0.00349661	0.0221767	0.354182
P50427	2.19036	2.44034	2.08199	2.16694	2.18212	2.20578	2.14746	2.16069	1.90273	2.23756	2.18495	2.07029	0.183783	0.0195738	0.145265	0.976486	0.925243	1.05538	0.64781	0.283826	0.246922
Q62188	2.19173	1.68981	1.73174	0.839939	0.972744	1.14537	1.75369	1.62908	1.65865	1.87109	0.986016	1.68047	0.27847	0.153145	0.0651066	0.526973	0.898124	0.586749	0.00849998	0.312575	0.00194342
P54071	2.19421	2.98736	2.80881	1.23712	1.62516	1.22419	1.72936	1.76771	1.60189	2.66346	1.36216	1.69965	0.416072	0.227859	0.0868122	0.511426	0.638138	0.801435	0.00896244	0.0171375	0.0745734
Q9R0P3	2.19622	1.8777	1.80795	1.87266	2.44987	2.23903	2.07172	1.87016	1.8106	1.96062	2.18718	1.9175	0.206996	0.292078	0.136845	1.11556	0.978003	1.14065	0.334572	0.778386	0.221129
Q99JY0	2.1993	2.91031	2.74413	1.68165	1.91215	1.49641	1.42329	1.78308	1.39307	2.61792	1.69674	1.53315	0.371931	0.208279	0.216973	0.648125	0.585636	1.1067	0.0200698	0.0120294	0.399488
P63001	2.20279	1.942	1.79145	1.99148	2.06032	2.19067	1.72774	1.87215	1.67726	1.97875	2.08082	1.75905	0.208118	0.101164	0.101146	1.05159	0.888973	1.18292	0.487422	0.175426	0.0176029
Q9D7X8	2.20791	3.00774	2.95137	2.43865	2.40218	3.12627	2.76245	2.81469	2.78503	2.72234	2.6557	2.78739	0.446395	0.407931	0.0261996	0.975521	1.02389	0.952755	0.85792	0.813486	0.606602
Q9D051	2.21025	2.96311	3.15647	1.40908	1.77959	1.15744	1.59424	1.66425	1.42218	2.77661	1.4487	1.56022	0.499921	0.312963	0.124573	0.521751	0.561916	0.928522	0.017547	0.0149835	0.597044
O88569	2.21121	1.88332	2.52625	2.54493	2.76059	2.61563	1.7273	2.60991	1.91737	2.20693	2.64038	2.08486	0.321486	0.109939	0.464535	1.19641	0.944688	1.26646	0.0916601	0.727208	0.114064
Q91V01	2.21154	1.7415	1.63221	1.16302	0.933008	0.902278	1.00846	1.45501	1.10953	1.86175	0.999436	1.191	0.307817	0.1425	0.234156	0.536826	0.639723	0.839155	0.0116621	0.0397896	0.292726
Q8VDN2	2.2211	1.96949	2.1076	2.29866	2.39528	2.27887	2.48917	2.51216	2.32534	2.0994	2.32427	2.44222	0.126008	0.0622871	0.101875	1.10711	1.1633	0.951702	0.0502812	0.0214945	0.162259
O35129	2.22123	2.64537	2.63276	2.21326	2.4485	1.90032	1.71881	2.41761	1.90639	2.49979	2.18736	2.01427	0.241317	0.275005	0.361676	0.875019	0.805777	1.08593	0.213218	0.12522	0.545411
Q64105	2.22459	2.38973	2.54164	1.14934	1.77371	1.31434	1.36568	1.47293	1.37403	2.38532	1.41246	1.40421	0.158569	0.323546	0.0596569	0.592148	0.58869	1.00587	0.00947171	0.000555467	0.96745
Q922R8	2.22569	1.97121	2.0265	1.9774	2.07715	2.26891	2.67692	2.75288	2.74668	2.07447	2.10782	2.72549	0.13385	0.148157	0.0421826	1.01608	1.31383	0.773371	0.786709	0.00130214	0.00225783
P61979	2.23646	2.39052	2.39334	3.1275	2.88517	3.15799	3.3218	3.31272	3.39635	2.34011	3.05689	3.34362	0.0897676	0.149493	0.0458863	1.3063	1.42883	0.914245	0.00205697	6.64121e-05	0.033667
P14148	2.24596	2.44253	2.67339	3.05563	2.85843	2.9635	3.7689	3.63975	3.52908	2.45396	2.95919	3.64591	0.213947	0.0986744	0.120028	1.20588	1.48573	0.811645	0.0205788	0.00109135	0.00156498
O88322	2.25	1.5596	1.87345	1.15219	1.62925	1.35875	1.45624	1.56117	1.2259	1.89435	1.38006	1.41444	0.345677	0.23924	0.171499	0.728516	0.74666	0.975699	0.101467	0.0975299	0.849593
P28474	2.25099	2.29616	2.35532	1.37735	2.10169	1.52137	1.546	1.47761	1.22648	2.30082	1.6668	1.4167	0.0523214	0.383448	0.168242	0.724439	0.615734	1.17654	0.0469821	0.00096468	0.359322
Q9CR67	2.26167	2.16125	2.16466	2.54041	1.94629	2.35798	2.49121	2.5016	2.6995	2.19586	2.28156	2.5641	0.057017	0.304343	0.117376	1.03903	1.1677	0.889809	0.656684	0.00811491	0.207935
Q8BMD8	2.27871	2.44256	2.53213	3.20332	2.92315	3.07227	2.15708	2.35294	1.98643	2.4178	3.06624	2.16548	0.128509	0.140182	0.183398	1.26819	0.895641	1.41596	0.00411385	0.12274	0.00249934
Q7TNG5	2.28462	2.40605	2.48634	2.47499	2.60539	2.49215	1.74838	1.82598	1.45703	2.39234	2.52418	1.67713	0.101558	0.0708554	0.194521	1.05511	0.701043	1.50506	0.138942	0.00484871	0.00209317
Q99P72	2.28852	3.75155	3.54976	2.00234	2.17826	1.53642	2.23582	2.66476	2.1183	3.19661	1.90567	2.33963	0.792874	0.33166	0.287638	0.596153	0.731908	0.81452	0.059944	0.153238	0.162044
Q9EPQ7	2.29006	1.88699	2.15414	1.13096	0.914017	1.45822	1.75333	1.45625	1.77622	2.1104	1.16773	1.66193	0.205063	0.27396	0.178492	0.553323	0.787498	0.702634	0.00883204	0.046061	0.0589306
Q11136	2.30045	2.17734	2.03092	1.24879	1.69194	1.57806	0.982864	1.43098	1.44525	2.16957	1.50626	1.28637	0.134929	0.230132	0.262937	0.694267	0.592913	1.17094	0.0125795	0.00662369	0.336981
Q8QZT1	2.3015	2.65715	2.53623	1.51744	1.79662	1.36242	1.72574	1.81324	1.58557	2.4983	1.55883	1.70819	0.180834	0.220037	0.114847	0.623956	0.68374	0.912563	0.00464232	0.00308176	0.356135
Q61398	2.31189	1.62451	1.50621	1.08935	1.0062	1.4224	1.4096	1.25586	1.27583	1.8142	1.17265	1.31377	0.435049	0.220248	0.0835964	0.646372	0.724156	0.892587	0.0848974	0.122031	0.358089
Q8BG05	2.31317	1.92868	2.18724	3.38859	3.25581	3.69573	2.76562	2.85614	2.8921	2.14303	3.44671	2.83795	0.196022	0.225647	0.06517	1.60833	1.32427	1.21451	0.00164523	0.00432157	0.0109117
Q62186	2.32923	1.70753	1.67204	2.00281	2.03064	1.88256	2.46636	2.47864	2.16101	1.90294	1.972	2.36867	0.369612	0.078698	0.179946	1.03629	1.24475	0.832535	0.767417	0.121235	0.0249371
Q8CIT9	2.33005	1.89083	2.4493	0.956863	1.34952	1.17977	1.37867	1.2729	1.50212	2.22339	1.16205	1.38456	0.294114	0.196927	0.11472	0.522648	0.622726	0.839291	0.0065448	0.0100143	0.166085
Q9CQ60	2.33168	2.07608	2.36434	2.92165	2.60766	3.02105	2.5683	2.30346	2.29438	2.25737	2.85012	2.38871	0.15785	0.215775	0.155597	1.26259	1.05819	1.19316	0.0184559	0.362711	0.0397784
Q60930	2.33373	2.95469	2.97698	2.6069	2.32317	2.26896	2.27637	2.33328	2.0473	2.75513	2.39968	2.21898	0.365117	0.181498	0.151377	0.870985	0.8054	1.08143	0.20557	0.0785601	0.256019
P14869	2.33774	2.21867	2.34877	2.66956	3.15755	2.6723	3.9324	3.17595	3.60658	2.30173	2.83314	3.57164	0.0721381	0.28095	0.379432	1.23087	1.55172	0.79323	0.0337543	0.0046968	0.0535754
Q9QYB5	2.33856	2.00192	2.07258	1.43499	1.43338	1.33001	1.12153	1.13108	1.11954	2.13769	1.39946	1.12405	0.177516	0.0601489	0.00617321	0.654662	0.525826	1.24502	0.00241394	0.000587917	0.00139588
P61089	2.34396	2.62136	2.65654	2.76605	3.02641	3.10618	2.90586	3.19959	2.96294	2.54062	2.96621	3.02279	0.171217	0.177878	0.155747	1.16752	1.18979	0.981282	0.0405095	0.0225922	0.699768
Q9R0Q3	2.35339	1.73891	2.04611	2.17616	1.85624	1.80632	2.29692	2.08694	2.0787	2.04614	1.94624	2.15419	0.307236	0.200676	0.123677	0.951177	1.05281	0.903468	0.661845	0.602212	0.201246
P21981	2.3555	2.22154	2.16415	1.33383	1.89652	1.18434	1.55128	1.67839	1.36693	2.24706	1.47156	1.5322	0.0981912	0.375535	0.156601	0.654884	0.681868	0.960426	0.0258074	0.0025839	0.809049
A0A0A6YVU8	2.36189	2.80677	2.92134	3.28916	2.51506	2.93089	3.73505	3.06163	3.74577	2.69667	2.9117	3.51415	0.295526	0.387405	0.391927	1.07974	1.30315	0.828565	0.487237	0.0448059	0.131219
Q9Z2X1	2.36502	1.80087	2.15316	2.42731	2.52406	2.59797	2.16575	2.12193	2.12388	2.10635	2.51645	2.13719	0.284975	0.0855828	0.0247537	1.1947	1.01464	1.17746	0.0753956	0.860944	0.00180319
P06745	2.36545	3.60338	3.5662	4.92487	4.13077	4.24506	2.47818	2.48746	2.60245	3.17834	4.43356	2.5227	0.704227	0.429302	0.0692267	1.39493	0.793714	1.75747	0.0578195	0.1838	0.00159933
P32261	2.37749	1.91703	1.4786	3.07488	2.88204	2.32962	1.57345	1.75259	1.89407	1.92437	2.76218	1.74004	0.449492	0.386822	0.160674	1.43537	0.904211	1.58743	0.0706726	0.54021	0.0134057
P56542	2.40325	1.89018	2.23289	1.64292	1.67618	1.88325	1.24286	1.72384	1.46726	2.17544	1.73411	1.47799	0.261316	0.130219	0.240667	0.797132	0.679397	1.17329	0.0589148	0.0272664	0.18029
P30275	2.40644	2.47519	3.23912	2.45995	2.77759	2.37316	2.42232	2.61907	2.63113	2.70692	2.5369	2.5575	0.462184	0.212911	0.117232	0.937192	0.944803	0.991944	0.593819	0.616133	0.890372
Q9CQD1	2.40651	2.22789	2.37713	2.71188	2.8046	2.75248	2.1069	2.23738	2.10724	2.33718	2.75632	2.1505	0.0957819	0.0464816	0.0752327	1.17934	0.920129	1.28171	0.00241795	0.0567044	0.000288886
Q6P069	2.40695	2.12179	1.94758	4.19438	3.55609	4.64798	2.09982	2.2634	2.65366	2.15877	4.13282	2.33896	0.231905	0.54854	0.284545	1.91443	1.08347	1.76695	0.00456082	0.443106	0.00734385
Q8BWT1	2.414	2.87854	2.86978	1.93138	2.00493	1.87496	2.277	1.90372	2.24611	2.72077	1.93709	2.14228	0.265707	0.0651715	0.207172	0.711963	0.787378	0.90422	0.00769799	0.0409865	0.177097
P18242	2.42645	2.38394	2.3069	1.82897	1.75474	2.54083	2.51066	2.72755	2.61035	2.37243	2.04151	2.61619	0.0606001	0.43401	0.108563	0.860516	1.10275	0.780338	0.260996	0.0273828	0.0901225
P45878	2.43081	2.15815	1.85548	1.87586	2.16513	1.80208	1.5266	2.22983	1.95247	2.14815	1.94769	1.90297	0.287797	0.191888	0.354218	0.906685	0.885865	1.0235	0.372296	0.404798	0.856881
Q9QXT0	2.43625	1.55978	1.72349	1.00604	1.40781	1.12306	1.51361	1.47791	1.76148	1.90651	1.17897	1.58434	0.466018	0.206636	0.154448	0.618395	0.831016	0.744143	0.0688049	0.319175	0.0528999
Q01768	2.44459	3.11508	2.56715	2.78314	2.82443	3.12879	3.57276	3.18271	3.61102	2.70894	2.91212	3.4555	0.357025	0.188774	0.237014	1.07501	1.27559	0.842751	0.432711	0.039262	0.0360083
P35492	2.45398	2.8183	3.08181	2.30462	2.12757	2.74146	2.15082	2.45277	2.00339	2.7847	2.39122	2.20233	0.315265	0.315976	0.229077	0.8587	0.790868	1.08577	0.201503	0.0607891	0.44904
P17809	2.46389	2.36037	2.93667	2.49506	3.07896	2.48057	2.95957	3.33448	2.76687	2.58697	2.68486	3.0203	0.307234	0.341375	0.288638	1.03784	1.1675	0.888938	0.730712	0.149606	0.263562
Q9CQF9	2.46631	1.94599	2.27765	2.3362	2.2127	2.23659	1.85083	1.85738	1.88142	2.22998	2.26183	1.86321	0.263417	0.0655029	0.0161063	1.01428	0.835528	1.21394	0.848885	0.0737838	0.000513545
P41731	2.46713	1.93698	2.17984	4.70548	3.60066	4.14993	2.26839	3.01949	2.20177	2.19465	4.15202	2.49655	0.265387	0.552412	0.454103	1.89188	1.13756	1.6631	0.00521788	0.376398	0.0160003
O70152	2.4707	2.03397	2.46081	1.69818	1.8473	1.5305	1.52568	1.71409	1.22734	2.32183	1.69199	1.48904	0.249341	0.15849	0.245433	0.728734	0.641321	1.1363	0.0209754	0.0145793	0.295231
Q99KQ4	2.47131	2.6871	2.62415	2.17254	2.7026	2.16154	1.37078	2.12735	1.53323	2.59418	2.34556	1.67712	0.110969	0.309256	0.39828	0.90416	0.646492	1.39856	0.260161	0.0184308	0.0833021
P84084	2.47167	2.28797	2.50846	2.35573	2.28111	2.38476	2.80563	2.38464	3.00649	2.4227	2.34053	2.73225	0.118116	0.0534674	0.317355	0.966085	1.12777	0.856632	0.333995	0.18851	0.102699
Q8BGS7	2.47309	2.93465	2.59791	3.78259	3.3262	3.31244	3.04437	3.16155	2.752	2.66855	3.47374	2.98598	0.23875	0.26756	0.210926	1.30173	1.11895	1.16335	0.0177033	0.159467	0.068234
Q9QXS1	2.47374	2.645	2.87779	1.9877	2.19729	1.90447	2.35621	2.50497	2.11396	2.66551	2.02982	2.32505	0.202805	0.150886	0.197358	0.761514	0.872272	0.873024	0.0121021	0.105562	0.108659
D3Z2H9	2.49035	1.69975	1.90071	2.98702	2.60901	3.46431	2.52262	2.24705	2.52617	2.03027	3.02011	2.43194	0.410914	0.428612	0.160138	1.48754	1.19784	1.24185	0.0446788	0.18981	0.0899599
Q8CCS6	2.49466	1.87141	2.03342	1.74487	1.7497	1.8491	2.11572	1.38183	1.9266	2.13317	1.78122	1.80805	0.323372	0.0588307	0.381038	0.835015	0.84759	0.985163	0.137252	0.322858	0.909891
O55023	2.49696	2.35486	2.35672	2.59926	2.10351	2.64753	2.5196	2.1334	2.15519	2.40285	2.4501	2.26939	0.0815067	0.301126	0.216957	1.01967	0.944461	1.07963	0.806	0.375042	0.446526
P67778	2.49855	2.34452	2.66119	2.19701	2.24863	2.0993	2.2968	2.37317	2.24182	2.50142	2.18165	2.30393	0.158352	0.0758397	0.0659677	0.872163	0.921049	0.946923	0.0343633	0.116913	0.102816
P14206	2.53638	2.33368	2.52219	3.001	3.20752	3.34195	4.57363	3.63967	3.91795	2.46408	3.18349	4.04375	0.113156	0.171743	0.479522	1.29196	1.64107	0.787262	0.00374686	0.0051458	0.0430141
Q3TW96	2.54074	1.94564	1.98586	1.59786	1.91684	1.89318	2.07618	1.9223	1.90192	2.15741	1.80263	1.9668	0.332579	0.177729	0.0952723	0.83555	0.911649	0.916526	0.178517	0.393973	0.231307
P47754	2.55307	2.84354	2.81563	2.84647	3.0986	2.7619	2.37758	2.61859	2.35854	2.73741	2.90233	2.45157	0.160253	0.175158	0.144959	1.06024	0.895578	1.18386	0.295258	0.0837472	0.0264414
Q6IRU2	2.55679	1.80313	2.04751	1.58924	1.80147	1.87751	2.56551	2.15221	2.29704	2.13581	1.75607	2.33825	0.384511	0.149399	0.209712	0.822205	1.09479	0.751019	0.186069	0.468221	0.0173031
E9Q616	2.56191	2.31852	2.38755	1.42656	1.58011	1.69765	2.18591	1.9779	1.89757	2.42266	1.56811	2.02046	0.125436	0.135942	0.148807	0.647268	0.833985	0.776114	0.00132271	0.0231804	0.0177312
O70251	2.58141	1.88661	2.1751	2.2868	2.74259	2.71554	3.47269	2.95007	3.58324	2.21438	2.58164	3.33533	0.349061	0.255703	0.338197	1.16586	1.50622	0.774029	0.215472	0.0162007	0.0369689
P62259	2.59552	2.4791	2.58552	2.10158	2.64737	2.12729	2.33263	2.24186	2.07196	2.55338	2.29208	2.21548	0.0645257	0.307958	0.13232	0.897665	0.867667	1.03457	0.22371	0.016463	0.712453
Q6ZWN5	2.60103	2.76123	2.74283	3.28729	3.48815	3.46794	4.70173	4.31888	4.49041	2.7017	3.41446	4.50368	0.0876608	0.110592	0.191768	1.26382	1.66698	0.75815	0.000940974	0.000121266	0.00104016
P62702	2.62412	2.62891	2.77424	3.40252	3.55672	3.35298	4.70618	4.36653	4.3335	2.67576	3.4374	4.46874	0.0853194	0.106255	0.20629	1.28465	1.67008	0.769212	0.00063711	0.000154831	0.00153205
Q9WTX5	2.62838	2.35613	2.41381	1.83494	2.2848	1.96478	2.03544	1.85739	1.95122	2.4661	2.02817	1.94801	0.14346	0.231535	0.0890667	0.82242	0.789916	1.04115	0.0495743	0.00602903	0.605561
E9Q557	2.63824	2.46418	2.82968	2.26124	2.15721	2.31778	2.40289	2.40429	2.23927	2.64403	2.24541	2.34882	0.182818	0.0814467	0.0948704	0.849237	0.888346	0.955976	0.0260605	0.0680236	0.2253
O70456	2.64565	2.08834	2.48376	2.33279	2.78785	2.66746	4.53255	2.81876	3.78027	2.40592	2.59604	3.71053	0.286694	0.235787	0.859025	1.07902	1.54225	0.699641	0.425137	0.067111	0.0961329
P84089	2.65317	2.61366	2.04512	3.53953	3.10665	4.01719	3.00979	3.04209	3.43818	2.43732	3.55446	3.16335	0.340226	0.455454	0.238553	1.45835	1.29788	1.12364	0.0271875	0.0389198	0.258053
Q9CQC9	2.65731	3.18338	2.69384	1.57036	2.05834	1.71703	2.20165	1.94517	1.94877	2.84484	1.78191	2.03186	0.29375	0.250376	0.14705	0.626366	0.714227	0.876985	0.00884105	0.0127815	0.21023
Q9D2G2	2.67356	3.78276	3.44803	2.83856	2.6882	2.56147	2.87636	2.9207	2.58523	3.30145	2.69608	2.7941	0.56894	0.138714	0.182234	0.816634	0.846325	0.964919	0.147862	0.215267	0.499663
P19157	2.67487	2.74165	2.6173	1.58233	2.5442	1.79184	1.91576	1.93294	1.70695	2.67794	1.97279	1.85188	0.0622288	0.505821	0.125811	0.736682	0.691533	1.06529	0.0746365	0.000521771	0.708393
P46638	2.68751	2.41041	2.55199	2.7626	2.95833	2.94814	3.023	2.61121	2.94829	2.54997	2.88969	2.86083	0.138561	0.110179	0.219384	1.13322	1.12191	1.01009	0.0292739	0.106623	0.848594
Q9JII6	2.71	2.21948	2.17932	2.17681	2.51267	2.62071	2.81516	3.1906	2.73071	2.3696	2.43673	2.91216	0.295475	0.231486	0.244809	1.02833	1.22897	0.836744	0.772211	0.0705176	0.0708962
Q91V61	2.72927	2.52597	2.83713	1.67535	2.24292	1.70631	2.01518	2.21261	1.72141	2.69746	1.87486	1.98307	0.158	0.31912	0.247173	0.695047	0.735162	0.945434	0.0161146	0.0135001	0.666567
P14824	2.74954	3.30044	3.04323	1.80528	2.23025	1.58845	2.36213	2.67482	2.28947	3.03107	1.87466	2.44214	0.27565	0.326478	0.204761	0.618481	0.805701	0.76763	0.00939393	0.0411174	0.063272
Q99LC5	2.75163	3.57681	3.51716	1.85088	2.18385	1.69223	1.93716	2.10012	1.90741	3.28186	1.90899	1.98156	0.460167	0.250909	0.103742	0.581677	0.603792	0.963374	0.0105221	0.00881124	0.667436
Q91VR2	2.76134	3.09977	3.10425	2.64937	2.21936	2.09934	2.04658	2.00843	2.07827	2.98845	2.32269	2.04443	0.196701	0.289208	0.0349704	0.777222	0.684109	1.13611	0.0300197	0.00121392	0.173377
Q921M4	2.76424	2.6912	3.04146	2.19879	1.79651	2.02961	2.39002	2.44098	2.83794	2.8323	2.0083	2.55631	0.184781	0.201986	0.245221	0.709071	0.902557	0.785625	0.00645645	0.194494	0.0404305
Q61730	2.76668	1.95609	1.56148	4.3886	3.20014	4.27951	2.02036	3.30277	2.71859	2.09475	3.95608	2.68057	0.61445	0.656935	0.64205	1.88857	1.27966	1.47584	0.0230829	0.317262	0.0739486
Q6P253	2.76914	2.79013	3.39379	2.31124	2.84317	2.38294	2.92707	2.65732	3.25736	2.98435	2.51245	2.94725	0.35474	0.288647	0.30053	0.841875	0.987568	0.852473	0.148432	0.896746	0.145002
Q99PT1	2.76957	2.37356	2.56772	2.31213	2.4753	2.59166	2.89105	2.32848	2.51758	2.57028	2.4597	2.57904	0.19802	0.140418	0.286275	0.956975	1.00341	0.953727	0.474231	0.967341	0.552152
Q8VEK3	2.77006	2.69723	2.65982	2.98748	2.5929	2.97652	3.20044	2.70172	2.79964	2.70904	2.8523	2.9006	0.056057	0.224716	0.264244	1.05288	1.07071	0.983346	0.344339	0.286654	0.821256
P14733	2.77499	2.17795	2.33144	2.69698	2.48955	2.6202	1.82862	1.89296	1.87369	2.42813	2.60224	1.86509	0.310039	0.104873	0.0330233	1.07171	0.768119	1.39524	0.40897	0.035262	0.000314251
P19536	2.78863	3.02177	3.43392	1.61127	1.98241	1.22745	1.31294	1.80696	1.84367	3.08144	1.60704	1.65452	0.326758	0.377495	0.296391	0.521524	0.536932	0.971304	0.0069106	0.0049847	0.872273
P97449	2.81083	2.49384	2.43165	1.36046	1.72097	1.36685	1.88352	2.05693	1.56873	2.57878	1.48276	1.83639	0.20336	0.206319	0.247491	0.574985	0.712119	0.807429	0.00280424	0.0159409	0.130091
P60766	2.812	2.34605	2.44201	3.54973	2.43374	3.51796	2.49859	2.46687	2.75759	2.53336	3.16714	2.57435	0.246039	0.635345	0.159483	1.25018	1.01618	1.23027	0.182424	0.820561	0.192086
Q9DCW4	2.82003	3.78095	3.433	1.92129	2.18935	1.73716	2.30088	2.36461	2.03068	3.34466	1.94927	2.23206	0.486512	0.227393	0.177283	0.5828	0.667349	0.873306	0.0108187	0.0204453	0.1646
P37804	2.84453	2.98525	3.66599	1.45846	2.69302	2.40455	2.83061	3.06138	2.69893	3.16526	2.18534	2.86364	0.439321	0.645812	0.183469	0.690415	0.904711	0.763133	0.0954902	0.334136	0.155026
Q9CZ13	2.84556	3.64102	3.53483	1.73277	1.98666	1.4597	1.95691	1.7745	1.66872	3.34047	1.72638	1.80004	0.431879	0.263539	0.145782	0.516807	0.538859	0.959075	0.00523897	0.0042502	0.693606
P97371	2.84631	2.28848	2.41175	2.25322	2.30997	2.60379	1.77341	2.02891	2.15979	2.51551	2.38899	1.98737	0.29303	0.188174	0.196511	0.949704	0.790047	1.20209	0.563325	0.0605105	0.0628559
P45376	2.84948	3.65755	3.15634	1.6496	2.59176	1.90322	2.28325	2.44334	2.29534	3.22112	2.04819	2.34064	0.407913	0.487525	0.0891474	0.635863	0.726654	0.875056	0.0330276	0.0217249	0.364538
Q9DB20	2.8699	4.19157	3.83893	2.05205	2.47739	1.85355	1.96996	2.48969	1.8857	3.63347	2.12766	2.11512	0.68437	0.318721	0.327116	0.585573	0.582121	1.00593	0.0259424	0.0256525	0.964343
P30412	2.88185	2.38337	1.73022	2.01403	1.41769	2.23151	3.95628	2.8093	3.59855	2.33181	1.88774	3.45471	0.577541	0.421354	0.58686	0.809561	1.48155	0.546427	0.342548	0.0774852	0.0198313
Q78T54	2.89624	2.87796	3.40126	2.93202	3.66885	2.90206	2.16861	2.58542	2.20741	3.05849	3.16764	2.32048	0.29699	0.434316	0.230263	1.03569	0.758701	1.36508	0.737517	0.0272401	0.0405409
Q60598	2.89845	2.14033	3.40544	1.89765	2.68384	2.18324	2.84726	3.15777	2.77752	2.81474	2.25491	2.92752	0.636696	0.397962	0.202432	0.801107	1.04007	0.770247	0.266126	0.784542	0.0594684
P97350	2.91172	2.74433	3.0766	2.47057	2.62069	2.56766	2.45575	2.67177	2.33561	2.91089	2.55297	2.48771	0.166136	0.0761293	0.170347	0.877043	0.854623	1.02623	0.0274729	0.0369191	0.577332
Q8R2Q0	2.91211	2.63034	2.98999	1.92783	2.17411	2.30139	3.30054	2.60029	3.03148	2.84415	2.13444	2.97744	0.189214	0.189915	0.353237	0.750468	1.04686	0.716872	0.0101429	0.595398	0.0219513
P08113	2.91591	2.34526	2.49872	2.22972	2.5564	2.33493	3.1595	2.91063	3.23793	2.58663	2.37368	3.10269	0.295311	0.166754	0.170886	0.917673	1.19951	0.765041	0.337929	0.0588143	0.00613541
P20060	2.91815	2.15661	2.12332	3.08592	2.70707	3.38878	1.5972	1.75959	1.80589	2.39936	3.06059	1.72089	0.449595	0.341556	0.109595	1.27559	0.717228	1.77849	0.112415	0.0640195	0.00294195
P19253	2.91967	2.87218	3.63664	3.74921	4.0775	3.442	4.11269	4.57152	3.80405	3.14283	3.75624	4.16275	0.42831	0.317804	0.386177	1.19518	1.32452	0.902345	0.117172	0.0375404	0.231941
Q9R1P0	2.92526	2.58673	2.75908	2.91477	3.58363	3.50828	3.38985	2.95893	3.48002	2.75702	3.33556	3.27627	0.169272	0.36636	0.278498	1.20984	1.18834	1.0181	0.0679962	0.0508715	0.834351
P70124	2.92947	2.90941	3.4028	2.60597	2.90272	2.83313	4.03378	2.96118	3.62464	3.08056	2.78061	3.53987	0.279247	0.155192	0.541306	0.902631	1.1491	0.785511	0.179233	0.261555	0.0797813
P82198	2.93762	2.56419	2.27359	2.71643	2.45258	2.6698	2.471	2.11543	2.48633	2.5918	2.61294	2.35758	0.332878	0.140817	0.209856	1.00816	0.909633	1.10831	0.924189	0.360833	0.155003
Q02257	2.94843	2.8552	3.31493	2.65526	2.76001	2.82733	3.43449	3.02191	2.95387	3.03952	2.74753	3.13676	0.243027	0.0867131	0.260076	0.903935	1.03199	0.875915	0.121557	0.660776	0.0697607
P08556	2.96357	2.13873	2.56981	2.00113	2.78391	2.44449	1.74888	1.90637	1.87949	2.55737	2.40984	1.84491	0.41256	0.39254	0.0842425	0.942312	0.721409	1.30621	0.676872	0.0427861	0.0714225
Q8BL97	2.9919	2.8828	1.93728	3.01383	3.32518	2.91308	3.44046	2.00961	2.70699	2.60399	3.08403	2.71902	0.579964	0.214832	0.7155	1.18435	1.04417	1.13424	0.250011	0.839324	0.445056
Q61735	2.99657	1.74194	2.17163	2.38155	2.76767	1.56967	1.28161	1.56561	1.40398	2.30338	2.23963	1.41707	0.637603	0.611482	0.14245	0.972323	0.615213	1.58046	0.906563	0.0785381	0.0858057
Q9D1L9	3.0298	2.2332	2.26213	2.26293	2.38437	2.48208	2.17987	2.50521	3.13784	2.50838	2.37646	2.60764	0.451801	0.109788	0.487128	0.94741	1.03957	0.911346	0.648877	0.808583	0.467563
P09411	3.02992	5.17605	4.87724	3.45885	4.55928	3.30765	2.92101	3.24224	3.16777	4.36107	3.77526	3.11034	1.16245	0.683178	0.168137	0.865673	0.713206	1.21378	0.4936	0.138889	0.176991
Q9CR68	3.08314	4.44108	3.35519	2.33742	2.41786	1.8083	2.68631	2.43987	2.21989	3.62647	2.18786	2.44869	0.718468	0.33116	0.233339	0.603302	0.675227	0.893481	0.0345251	0.054067	0.327247
O35640	3.08594	2.60104	3.06134	2.14401	3.00442	2.13331	1.53932	2.12585	1.55706	2.91611	2.42725	1.74075	0.273133	0.499877	0.333629	0.832359	0.596941	1.39437	0.211355	0.00916131	0.119004
Q7TPC1	3.1077	3.77793	3.20889	2.49256	2.85071	2.90367	3.80962	2.57605	3.67535	3.36484	2.74898	3.35367	0.36131	0.223639	0.676781	0.816972	0.996681	0.819693	0.0660339	0.981091	0.215659
Q61753	3.10841	2.90239	2.91013	3.52585	2.71783	3.19523	3.50743	2.67577	3.34487	2.97364	3.1463	3.17603	0.116774	0.406229	0.440792	1.05806	1.06806	0.990641	0.518288	0.48493	0.935683
P14131	3.11068	3.06378	3.22785	3.66056	4.48506	3.36826	3.88155	4.2385	4.21664	3.1341	3.83796	4.11223	0.0845042	0.579145	0.200073	1.22458	1.31209	0.933304	0.105667	0.0014572	0.481447
P67984	3.12803	2.26821	3.59226	3.44197	2.98112	3.45321	3.33684	4.08707	3.17985	2.99617	3.2921	3.53459	0.671804	0.269377	0.48486	1.09877	1.1797	0.931395	0.517927	0.323294	0.491074
P21460	3.15263	3.11656	2.85061	2.77677	3.47147	3.11443	1.63671	2.82089	1.89191	3.03994	3.12089	2.1165	0.164951	0.347394	0.623223	1.02663	0.696232	1.47455	0.73386	0.0681405	0.0713484
Q8C754	3.16573	2.06394	2.63294	5.53937	3.31131	5.06645	3.69401	2.5272	3.10325	2.62087	4.63905	3.10815	0.550992	1.17391	0.583423	1.77004	1.18592	1.49254	0.0543432	0.352258	0.113146
Q9D2Q8	3.1994	2.58633	2.89471	2.40688	2.56279	2.66991	3.21346	2.18397	2.41206	2.89348	2.54653	2.60316	0.306538	0.132266	0.540697	0.88009	0.899665	0.978243	0.146236	0.463874	0.868672
P01831	3.20108	3.10352	3.13984	1.7001	1.44054	1.73605	3.5503	3.08738	2.59102	3.14815	1.62556	3.07623	0.0493075	0.161241	0.479736	0.516356	0.977157	0.528427	9.75874e-05	0.808942	0.00768082
O35405	3.2499	3.4313	3.95838	3.35409	2.76663	3.82282	5.1158	4.36214	5.17049	3.54653	3.31452	4.88281	0.368027	0.529205	0.451742	0.93458	1.37679	0.678813	0.56679	0.0165086	0.0174825
Q8BGZ7	3.2501	3.12289	3.01333	1.5564	2.19272	1.63243	2.28095	1.36325	1.78465	3.12877	1.79385	1.80962	0.118494	0.347516	0.459358	0.57334	0.578379	0.991288	0.00324951	0.00854574	0.964461
Q9CXE7	3.26536	2.80182	3.04957	3.1402	3.07842	3.3364	3.00209	3.2679	2.76582	3.03892	3.18501	3.01194	0.231954	0.134698	0.251182	1.04807	0.991122	1.05746	0.398908	0.897884	0.352253
P10493	3.27279	2.76025	2.87856	1.72156	2.30284	1.81771	1.91137	2.1368	1.67227	2.97053	1.94737	1.90681	0.268362	0.311573	0.232295	0.655563	0.641909	1.02127	0.0125498	0.00655718	0.865345
P17182	3.30318	3.88159	4.21126	5.50991	4.68766	5.61401	4.95602	4.39428	5.08014	3.79868	5.27053	4.81014	0.459682	0.507453	0.365459	1.38746	1.26627	1.09571	0.0204165	0.0406091	0.271293
O08553	3.35606	2.47842	2.5016	1.26876	1.85889	1.77667	1.85221	1.65437	1.91772	2.77869	1.63478	1.8081	0.500148	0.31963	0.137104	0.588326	0.650703	0.904139	0.0288884	0.031625	0.436719
Q60692	3.35813	3.19545	3.35465	3.52978	4.73852	4.27149	4.45229	4.05477	4.23566	3.30274	4.17993	4.24757	0.092933	0.609549	0.19903	1.26559	1.28607	0.984075	0.0693866	0.00173395	0.863905
Q9EQU5	3.36457	2.83515	3.48133	4.34563	4.21317	4.30042	4.35714	4.10257	3.80872	3.22701	4.28641	4.08948	0.344349	0.0673325	0.27444	1.32829	1.26726	1.04816	0.00638524	0.0274668	0.293896
Q99LX0	3.36862	4.51596	3.72116	2.17893	2.97704	2.57507	2.26592	2.69403	2.28996	3.86858	2.57701	2.41664	0.587702	0.399058	0.24053	0.666139	0.624684	1.06636	0.0345438	0.0166741	0.583172
Q04447	3.40254	2.33806	2.58193	1.05934	1.63424	1.53326	2.02887	1.59106	1.94893	2.77418	1.40895	1.85629	0.557672	0.30695	0.233146	0.507879	0.66913	0.759013	0.0205694	0.0581716	0.114781
O08709	3.41228	3.36986	3.10814	3.14394	3.66395	3.81113	2.44048	2.85604	2.55976	3.29676	3.53967	2.61876	0.164722	0.350525	0.213968	1.07368	0.794345	1.35166	0.338407	0.0121678	0.0177799
P34884	3.41425	4.9875	3.79834	3.49875	4.42004	4.52346	4.66375	4.88446	5.4412	4.0667	4.14742	4.99647	0.820234	0.564142	0.400643	1.01985	1.22863	0.830069	0.895099	0.152475	0.100732
Q64433	3.4426	3.82428	4.29657	2.43454	3.82481	2.92562	2.21286	3.90998	3.43364	3.85448	3.06166	3.18549	0.427784	0.705051	0.875348	0.794311	0.826439	0.961125	0.171213	0.300092	0.857952
P10126	3.44305	4.12582	3.48631	5.6612	5.12518	5.83782	8.04855	6.05108	7.67289	3.68506	5.5414	7.25751	0.382323	0.371117	1.06154	1.50375	1.96944	0.76354	0.00380192	0.00538408	0.0573883
P27773	3.46367	2.83558	3.23317	3.86035	3.90389	4.07136	4.74886	4.3914	4.66915	3.17748	3.9452	4.60313	0.317729	0.111405	0.187652	1.24161	1.44868	0.857068	0.0168266	0.0025938	0.006419
P51150	3.47091	3.10519	3.51079	4.59592	4.30352	4.77872	3.54938	3.79033	3.56676	3.3623	4.55939	3.63549	0.223553	0.239695	0.134376	1.35603	1.08125	1.25413	0.00319562	0.143855	0.0043305
P42669	3.4753	3.93522	3.87719	2.86998	3.4429	2.84198	2.05219	2.9788	2.30959	3.76257	3.05162	2.44686	0.250468	0.339146	0.478311	0.811047	0.650317	1.24716	0.0432125	0.0134695	0.148565
P47738	3.47702	3.22103	3.10869	4.10452	3.0493	3.95868	2.47324	2.76087	2.41281	3.26891	3.70417	2.54898	0.188772	0.571803	0.185979	1.13315	0.779763	1.4532	0.278792	0.00926991	0.0291707
Q9CQM5	3.51613	3.12431	3.29443	2.27672	3.35469	3.12996	2.87617	3.06886	3.28977	3.31162	2.92045	3.07827	0.196472	0.568705	0.206959	0.88188	0.929534	0.948733	0.323134	0.229612	0.674922
Q9QXC1	3.51892	2.3043	2.1079	3.93717	4.39187	3.80182	2.48414	2.96017	3.239	2.6437	4.04362	2.89444	0.764294	0.309093	0.381699	1.52953	1.09484	1.39703	0.0423431	0.637966	0.0154429
O35682	3.52929	4.21401	3.26297	3.49037	2.51506	3.56202	4.83913	4.2802	4.03995	3.66876	3.18915	4.38643	0.49062	0.584875	0.410043	0.869272	1.19562	0.727049	0.337697	0.123801	0.0439759
Q60932	3.53058	5.21211	4.93871	2.73883	3.09879	2.21823	2.69514	2.70348	2.43811	4.56047	2.68528	2.61225	0.902326	0.442717	0.150862	0.588817	0.572802	1.02796	0.0319303	0.0210465	0.800179
P97298	3.53482	2.35274	2.26233	1.39595	1.70781	2.24	2.76517	1.55949	2.39107	2.71663	1.78125	2.23857	0.710015	0.426788	0.617136	0.655684	0.824026	0.795708	0.122156	0.428464	0.350662
Q9ESB3	3.55023	2.45731	2.19339	5.16582	5.4709	4.70642	3.8999	6.5631	5.17825	2.73364	5.11438	5.21375	0.719391	0.384827	1.33196	1.8709	1.90725	0.980941	0.00720932	0.0469793	0.907192
P63328	3.57186	3.41108	3.54274	2.42301	2.12493	2.08215	2.16442	2.19613	2.23059	3.50856	2.21003	2.19705	0.0856703	0.18568	0.0330949	0.629897	0.626197	1.00591	0.000388361	1.58576e-05	0.910835
O55013	3.6042	3.38705	3.06992	3.71994	3.55825	3.79721	3.69398	3.47553	3.32493	3.35372	3.6918	3.49815	0.268696	0.121942	0.185565	1.10081	1.04306	1.05536	0.118195	0.486359	0.205418
P14211	3.63847	2.5517	2.66876	2.755	2.96743	3.15463	3.74052	3.14151	3.79061	2.95298	2.95902	3.55755	0.59653	0.199946	0.36117	1.00205	1.20473	0.831759	0.987522	0.207603	0.065973
P63017	3.71248	3.43132	3.87295	3.74265	4.4902	3.79907	3.35323	4.10145	3.87807	3.67225	4.01064	3.77759	0.223544	0.416271	0.384097	1.09215	1.02868	1.06169	0.282599	0.702447	0.515419
O89113	3.71403	4.08513	3.87611	5.71568	4.29893	6.41255	6.12256	5.44585	5.74311	3.89176	5.47572	5.77051	0.186044	1.07705	0.339186	1.407	1.48275	0.948915	0.0660527	0.00109343	0.674583
P11499	3.71616	3.59177	3.90488	2.82804	3.67745	2.91125	4.07995	3.4622	3.9613	3.7376	3.13891	3.83448	0.157654	0.468239	0.327817	0.83982	1.02592	0.818602	0.103791	0.668556	0.102751
P20029	3.73588	2.87617	3.30814	3.41745	3.76804	3.48734	3.58993	4.0018	3.90315	3.30673	3.55761	3.83163	0.429856	0.185556	0.215047	1.07587	1.15874	0.928486	0.405887	0.131522	0.170052
P14152	3.76618	5.36194	5.40279	2.25724	2.9816	2.4501	2.88677	2.95595	2.71734	4.84364	2.56298	2.85336	0.933327	0.37514	0.122764	0.529144	0.589094	0.898234	0.0171455	0.0215426	0.271592
Q9Z1Q5	3.76996	3.33152	3.65433	5.47506	4.9572	5.49182	4.17599	3.92018	4.48463	3.58527	5.30803	4.1936	0.227234	0.303942	0.282639	1.48051	1.16968	1.26574	0.00141382	0.0438799	0.00965683
P07091	3.78758	2.97695	3.54077	2.16852	3.7821	2.78679	2.95343	3.19177	3.28266	3.4351	2.91247	3.14262	0.415516	0.8141	0.170028	0.847855	0.914856	0.926764	0.378047	0.322261	0.656735
P62852	3.79362	2.65314	4.08506	4.83737	5.70919	4.54434	4.38822	5.80698	4.08004	3.51061	5.0303	4.75841	0.756749	0.605918	0.921066	1.43289	1.35544	1.05714	0.0532515	0.144038	0.691264
P70202	3.86612	3.57632	4.07569	3.43895	3.40129	4.15004	5.04621	4.53214	3.98338	3.83938	3.66343	4.52058	0.250757	0.421843	0.53151	0.954172	1.17742	0.81039	0.568231	0.11511	0.0939143
P61205	3.86748	3.51423	3.56325	3.75201	3.79809	3.98135	4.0327	3.45268	3.97024	3.64832	3.84382	3.81854	0.191374	0.121315	0.318378	1.05358	1.04666	1.00662	0.209387	0.471803	0.903967
P14429	3.89381	3.47115	3.93934	3.73639	4.08599	3.87646	2.41657	3.18971	3.09031	3.7681	3.89961	2.89886	0.258172	0.175944	0.420627	1.0349	0.769317	1.34522	0.506339	0.038008	0.019076
Q61495	3.90952	3.68742	4.42817	2.09393	2.96699	2.31634	3.36632	2.95894	2.62189	4.00837	2.45909	2.98239	0.380139	0.453698	0.372768	0.613488	0.74404	0.824537	0.0105485	0.0288964	0.197567
O35658	3.91675	3.51591	3.90389	2.7	3.04638	2.79829	2.97021	3.2499	2.22849	3.77885	2.84823	2.8162	0.227802	0.178507	0.527834	0.753728	0.745254	1.01137	0.00509158	0.0441052	0.925495
Q62425	3.93894	5.89655	4.86604	3.44435	2.52561	2.61586	3.75025	3.33288	3.60566	4.90051	2.86194	3.56293	0.979261	0.506395	0.211939	0.584009	0.727053	0.803255	0.0328134	0.0818265	0.0914492
F6YVP7	3.94115	4.07683	4.00367	5.97946	5.85579	5.84157	3.54797	4.77001	4.26378	4.00722	5.89228	4.19392	0.0679124	0.0758409	0.614007	1.47042	1.04659	1.40496	5.63441e-06	0.628305	0.0089396
O54962	3.95222	3.30072	4.11037	2.56766	3.48693	2.86643	1.91465	2.50508	2.14822	3.78777	2.97367	2.18932	0.429146	0.468926	0.297351	0.785073	0.577997	1.35826	0.0907877	0.00607548	0.0706961
O54724	4.04657	3.48257	3.77588	2.30484	2.95289	2.60573	2.6985	2.87834	2.35085	3.76834	2.62116	2.64256	0.282076	0.3243	0.268158	0.695573	0.701253	0.9919	0.00985955	0.00743743	0.93403
P19783	4.05919	5.49924	5.66826	3.27948	3.43337	2.47623	3.43688	3.71307	3.03047	5.07556	3.06303	3.39347	0.884252	0.513972	0.343363	0.603485	0.668591	0.902623	0.0270723	0.037242	0.406874
O35215	4.09045	3.87874	3.10424	1.96944	2.88756	2.81266	2.2645	2.59563	2.45369	3.69114	2.55655	2.43794	0.519179	0.509836	0.166125	0.692619	0.660484	1.04865	0.0540558	0.0163742	0.721109
Q9CZU6	4.09394	5.54987	5.8169	2.98736	3.26618	2.47306	3.99621	3.48509	3.16629	5.15357	2.90887	3.5492	0.927327	0.402346	0.418655	0.564437	0.688687	0.819584	0.0183619	0.0523787	0.128734
P35980	4.12163	3.62398	4.6696	5.81289	6.11473	5.13627	5.97445	7.10314	5.11693	4.1384	5.68796	6.06484	0.523014	0.50105	0.996186	1.37443	1.4655	0.937859	0.0207338	0.0413248	0.589718
P00405	4.1368	5.19973	5.90013	2.8233	3.41138	2.13019	2.76261	3.1513	2.43563	5.07889	2.78829	2.78318	0.887855	0.64131	0.358278	0.548996	0.54799	1.00184	0.0223095	0.0142242	0.990963
Q7TMM9	4.15137	2.81438	2.94499	2.64482	2.74185	3.03738	5.57111	4.72983	4.7704	3.30358	2.80802	5.02378	0.737109	0.204471	0.47444	0.849991	1.52071	0.558945	0.324622	0.0273049	0.00175304
Q9DAS9	4.15386	3.44859	3.5374	4.12099	3.89726	3.83928	3.19472	4.01581	2.65737	3.71328	3.95251	3.2893	0.384124	0.148761	0.68414	1.06442	0.885819	1.20163	0.371378	0.402278	0.176199
P52480	4.21231	6.2208	5.33874	6.30374	7.67529	6.03488	4.96774	4.90252	4.79144	5.25728	6.6713	4.88723	1.00672	0.879808	0.0891393	1.26896	0.929612	1.36505	0.140926	0.560415	0.0250238
P09103	4.24258	2.91819	3.11961	2.97939	3.34752	3.25675	4.40886	3.81615	4.04118	3.4268	3.19455	4.08873	0.713636	0.191783	0.299202	0.932228	1.19317	0.781306	0.615122	0.212566	0.0120818
P97823	4.26827	5.26551	5.6458	4.16206	4.2692	4.62278	4.4118	4.38874	4.05926	5.05986	4.35135	4.2866	0.711418	0.241092	0.197217	0.859974	0.847177	1.0151	0.177657	0.143844	0.737023
Q9JL62	4.27186	3.51703	4.34824	3.07686	4.2625	3.31379	4.51718	3.69686	4.23156	4.04571	3.55105	4.14853	0.459437	0.627416	0.416417	0.877733	1.02542	0.855978	0.332407	0.788211	0.241331
P26350	4.29354	3.92907	4.85351	3.54293	3.8666	3.85703	5.01078	3.25792	3.64059	4.35871	3.75552	3.96976	0.465654	0.184173	0.921627	0.861613	0.910765	0.946032	0.105263	0.549726	0.71312
P99027	4.29856	3.28132	3.95749	3.54228	4.09522	3.82488	5.32922	4.2631	5.63667	3.84579	3.82079	5.07633	0.517738	0.276494	0.720858	0.993501	1.31997	0.752668	0.944743	0.0742363	0.04799
Q61205	4.32451	4.11024	4.15037	1.99852	2.95067	2.53957	3.15131	2.58662	2.66535	4.19504	2.49625	2.80109	0.113905	0.477549	0.30584	0.595048	0.667715	0.891172	0.00389845	0.00178068	0.404527
Q9CPQ1	4.33672	5.74693	5.90423	3.13045	3.98713	2.53331	3.26318	3.69374	3.42534	5.3293	3.21696	3.46075	0.863183	0.730764	0.217455	0.603638	0.649383	0.929555	0.0318252	0.0220466	0.609195
P35700	4.42691	4.20972	4.15251	3.22157	4.07801	3.86513	4.26691	4.12936	4.29639	4.26304	3.72157	4.23089	0.144763	0.445901	0.0891489	0.872985	0.992457	0.87962	0.11605	0.759634	0.12438
P61804	4.43029	4.36429	4.46134	4.68415	3.79251	4.12078	5.1463	5.51373	5.06532	4.41864	4.19915	5.24178	0.0495639	0.450956	0.238968	0.950326	1.18629	0.801091	0.449193	0.00428086	0.0240461
Q78IK2	4.47061	6.96704	5.97249	3.61694	4.55843	2.76046	3.88396	3.96488	2.98051	5.80338	3.64528	3.60978	1.25678	0.899318	0.546467	0.62813	0.622013	1.00983	0.072861	0.050207	0.956213
P63101	4.47598	3.78175	4.34029	4.65687	4.26955	4.66338	4.53552	3.87253	4.42897	4.19934	4.52993	4.279	0.367956	0.225521	0.356029	1.07872	1.01897	1.05864	0.255251	0.800878	0.360689
Q9CQV8	4.52744	4.01845	4.2236	5.38772	5.20327	5.71464	4.94627	4.46583	4.59798	4.2565	5.43521	4.67003	0.256082	0.258972	0.24819	1.27692	1.09715	1.16385	0.00497399	0.115	0.0209294
Q8VEM8	4.58065	6.66406	6.94912	4.32712	4.2887	3.51774	5.15074	5.1732	4.41075	6.06461	4.04452	4.91156	1.29303	0.456605	0.433862	0.666905	0.809873	0.823469	0.063201	0.216962	0.0756364
Q9ERS2	4.62416	6.90807	6.52007	3.21889	3.24673	2.60977	3.65181	3.7292	3.08396	6.01743	3.02513	3.48832	1.22211	0.359985	0.352322	0.502728	0.579702	0.867217	0.0152472	0.0261941	0.18644
P17879	4.62922	4.46332	5.40331	2.92207	4.12645	3.16908	3.29088	3.31746	3.23554	4.83195	3.40587	3.28129	0.501715	0.636146	0.0417908	0.704864	0.679083	1.03796	0.038075	0.00594612	0.752049
Q03265	4.65201	6.29415	6.62974	3.64304	4.54246	3.23876	4.15332	4.2327	3.77444	5.85864	3.80809	4.05349	1.05835	0.667337	0.244898	0.649995	0.691883	0.939458	0.0469317	0.0450959	0.582084
B1ARV6	4.76347	4.02582	5.30862	5.21319	4.80579	5.5404	5.82963	6.69862	5.80562	4.6993	5.18646	6.11129	0.643803	0.368034	0.508785	1.10367	1.30047	0.848669	0.318717	0.0407228	0.0632413
P10639	4.791	3.93341	4.25127	5.16857	5.41205	6.08418	4.12638	4.30749	5.70475	4.32523	5.55493	4.71288	0.433554	0.474235	0.863752	1.28431	1.08962	1.17867	0.0295219	0.525467	0.212942
P68368	4.85927	5.62173	5.23449	6.3759	5.68382	5.71045	5.27108	5.61542	4.74822	5.2385	5.92339	5.21157	0.381245	0.392111	0.436653	1.13074	0.99486	1.13658	0.0959091	0.939746	0.103559
Q60605	4.90619	3.8938	4.20357	5.59528	5.97618	6.48029	4.06188	3.93453	3.81846	4.33452	6.01725	3.93829	0.518746	0.44393	0.121754	1.38822	0.908587	1.52788	0.0129629	0.267212	0.00144173
P17047	4.93041	4.14275	3.68346	5.42695	4.81241	6.03442	4.31853	4.85776	4.17508	4.25221	5.42459	4.45045	0.630638	0.611008	0.359953	1.27571	1.04662	1.21889	0.0818012	0.660946	0.0760503
Q62465	5.00539	3.98478	3.94824	2.45071	3.66421	2.91154	2.92752	3.29935	2.69669	4.3128	3.00882	2.97452	0.600076	0.612572	0.304067	0.697649	0.689695	1.01153	0.0579529	0.0261572	0.934941
P14602	5.10552	5.27311	5.57605	2.94181	4.57805	3.31636	3.80096	4.97896	3.50918	5.31823	3.61207	4.09636	0.238489	0.857269	0.778148	0.679187	0.77025	0.881776	0.0293499	0.0600282	0.508861
P01897	5.13619	3.89983	4.58937	4.6986	4.85747	4.08106	2.95341	4.04878	3.56077	4.5418	4.54571	3.52098	0.619551	0.410163	0.548768	1.00086	0.77524	1.29103	0.993162	0.0994989	0.0606434
P48036	5.18342	4.10661	4.29042	2.98725	3.69369	3.11032	3.53757	3.36483	3.24995	4.52682	3.26375	3.38412	0.576016	0.377384	0.144774	0.720982	0.747571	0.964433	0.033636	0.0290407	0.633213
P63213	5.2185	3.98115	3.88563	4.58584	4.80047	4.99674	3.69963	4.53998	3.61773	4.36176	4.79435	3.95245	0.743498	0.205515	0.51046	1.09918	0.906159	1.21301	0.386386	0.475766	0.0569841
P70296	5.23728	5.62147	5.7551	2.11611	3.64715	2.70629	2.96816	3.02541	2.76304	5.53795	2.82318	2.91887	0.268823	0.772182	0.137956	0.509789	0.527067	0.967217	0.00453296	0.000114683	0.842988
P08122	5.27057	5.63676	6.5779	4.01996	5.56457	3.4966	3.33676	4.27382	2.67866	5.82841	4.36038	3.42974	0.674411	1.07519	0.801634	0.748125	0.588453	1.27134	0.115667	0.0165959	0.295694
P57776	5.37564	4.18032	4.88331	4.33161	5.03714	4.60489	6.69751	5.49246	6.38062	4.81309	4.65788	6.1902	0.600747	0.355734	0.624687	0.967753	1.28612	0.752461	0.719799	0.0512617	0.0209829
P61957	5.42469	4.83846	5.6956	5.00537	7.01152	5.32499	2.78476	4.51218	4.45789	5.31958	5.78063	3.91828	0.438131	1.0779	0.98203	1.08667	0.736576	1.4753	0.530232	0.0869589	0.0914069
Q9D0M3	5.5176	7.3136	6.87666	3.73826	4.33283	3.41501	3.9284	3.83926	3.50858	6.56929	3.8287	3.75874	0.936622	0.465549	0.221185	0.582818	0.572169	1.01861	0.0105104	0.00718923	0.82569
P17742	5.63185	5.05331	4.74837	6.02519	6.145	6.77848	5.70222	5.90633	5.78302	5.14451	6.31622	5.79719	0.448743	0.404781	0.102789	1.22776	1.12687	1.08953	0.0283522	0.0700206	0.0976959
P08249	5.67995	7.8479	7.11872	4.78196	4.72041	4.43246	5.58582	4.57029	4.89685	6.88219	4.64494	5.01765	1.10316	0.18657	0.518431	0.674922	0.729078	0.92572	0.0257361	0.0570125	0.306365
P05213	5.74926	5.21838	5.19817	5.33032	5.60279	5.72582	8.05907	6.42426	6.78898	5.3886	5.55297	7.09077	0.312496	0.202401	0.858173	1.0305	1.31588	0.783127	0.487094	0.0320326	0.0391304
P13020	5.8865	4.66847	4.61816	5.07655	5.0817	5.40707	3.97605	3.87809	4.10241	5.05771	5.18844	3.98552	0.718196	0.189358	0.11246	1.02585	0.788009	1.30182	0.775677	0.0629948	0.00069636
P16110	5.89772	5.14555	5.04551	7.42252	8.40791	8.60508	6.81632	6.7442	7.12836	5.36293	8.14517	6.89629	0.465839	0.633548	0.204187	1.51879	1.28592	1.18109	0.00359282	0.00642012	0.0313851
P20108	5.9614	7.51742	7.41345	4.20714	5.06643	4.06262	5.28317	5.20024	4.58933	6.96409	4.4454	5.02425	0.869908	0.542663	0.378924	0.638331	0.721451	0.884788	0.0131068	0.0239915	0.204393
P16858	6.01596	9.97276	8.24931	6.26359	7.46354	5.93032	5.76761	6.12939	5.59996	8.07934	6.55248	5.83232	1.98387	0.806406	0.270579	0.811017	0.721881	1.12348	0.28444	0.123835	0.216409
P56135	6.03279	8.11176	7.71654	4.27013	5.29083	3.32965	5.00621	4.92193	4.59282	7.28703	4.29687	4.84032	1.10403	0.980863	0.218445	0.58966	0.664238	0.887725	0.0247403	0.0196812	0.401946
Q9WUM3	6.11446	5.29943	5.64031	4.02064	3.43623	4.13258	4.18992	4.40053	4.6639	5.68473	3.86315	4.41812	0.409324	0.373934	0.23748	0.679565	0.77719	0.874388	0.0047091	0.00976365	0.0958125
A0A075B5M2	6.12941	4.85821	4.01597	6.94193	7.10648	8.62496	6.45343	4.99196	7.986	5.0012	7.55779	6.47713	1.06395	0.927848	1.49716	1.5112	1.29512	1.16684	0.0349569	0.23637	0.347827
Q61171	6.17066	6.14283	6.24246	4.90633	6.85697	8.00175	7.3481	6.85705	8.75158	6.18531	6.58835	7.65224	0.0514099	1.5651	0.983204	1.06516	1.23716	0.86097	0.678815	0.0612841	0.375201
P68372	6.23329	5.93649	6.32579	6.28884	6.48859	6.5217	7.9644	6.94437	7.33658	6.16519	6.43304	7.41511	0.20339	0.125979	0.514532	1.04345	1.20274	0.867558	0.124495	0.0173504	0.0325559
P23953	6.29626	4.87021	4.23006	6.8868	7.11851	6.25362	3.64983	6.23426	5.03713	5.13218	6.75298	4.97374	1.05772	0.447701	1.29338	1.31581	0.969128	1.35773	0.0708877	0.877502	0.0874885
P17156	6.62194	6.1384	7.18891	6.0326	6.73938	6.12744	5.97311	6.52048	5.72597	6.64975	6.29981	6.07319	0.525809	0.383628	0.406597	0.947375	0.913295	1.03731	0.404446	0.2074	0.521285
P0DP26	6.6653	4.86613	5.74624	4.70248	5.17618	4.99569	4.75549	4.41364	3.8556	5.75922	4.95812	4.34157	0.899656	0.239074	0.454252	0.8609	0.753847	1.14201	0.210325	0.0714884	0.105984
Q9D358	6.7127	7.50302	7.51044	4.82466	5.62865	5.92469	3.31717	5.53067	5.52876	7.24205	5.45933	4.7922	0.458453	0.569226	1.27742	0.753838	0.661718	1.13921	0.0134273	0.035304	0.455096
Q9QWL7	6.71465	6.57373	7.17159	6.64131	5.59435	7.45595	6.91877	7.13519	7.19518	6.81999	6.56387	7.08305	0.312542	0.933213	0.145394	0.962446	1.03857	0.926702	0.675526	0.25676	0.394957
P48678	6.95173	5.98835	6.53406	4.32223	5.27418	5.02304	5.63968	5.38149	4.86844	6.49138	4.87315	5.29654	0.483105	0.493361	0.39258	0.750711	0.815934	0.920064	0.0153596	0.0292548	0.309446
P63168	6.97506	6.33088	5.56725	6.5302	5.86387	7.20963	9.45486	8.39501	8.84384	6.29107	6.53456	8.89791	0.704751	0.672888	0.53199	1.03871	1.41437	0.734393	0.687451	0.0069175	0.00882644
E9PWQ3	6.99413	5.22673	5.88056	4.34849	4.48209	4.39639	4.86853	4.30087	3.97445	6.03381	4.40899	4.38128	0.89361	0.0676894	0.452431	0.730714	0.726122	1.00632	0.0348367	0.046039	0.921507
P21614	7.03024	5.22415	4.5456	6.49678	9.12084	5.6756	4.74625	6.07711	6.18242	5.6	7.09774	5.66859	1.28425	1.79952	0.800507	1.26745	1.01225	1.25212	0.305732	0.941195	0.277205
Q61781	7.4108	7.3738	7.16548	7.82212	5.98142	9.40414	15.4149	11.0936	15.3211	7.31669	7.7359	13.9432	0.132253	1.71299	2.46828	1.05729	1.90567	0.554816	0.694309	0.00971003	0.0231996
P61982	7.56842	6.78957	6.95457	5.30986	6.83222	5.82323	6.1036	6.39964	6.48496	7.10419	5.98844	6.3294	0.410418	0.774508	0.200146	0.842945	0.890939	0.946131	0.0921628	0.0424342	0.501334
P56480	7.74378	9.02639	10.7862	5.07981	5.97093	4.51047	6.12891	6.06946	5.19157	9.18545	5.18707	5.79665	1.52742	0.736115	0.524857	0.564706	0.631069	0.89484	0.0150433	0.022077	0.307731
Q9CPQ8	7.76946	11.2721	10.9903	5.4313	6.4593	4.73232	5.94568	6.50222	5.27243	10.0106	5.54097	5.90678	1.94601	0.8687	0.615818	0.553509	0.590051	0.93807	0.0221069	0.0252962	0.583859
P51881	7.77089	11.0231	9.23788	7.39459	7.9395	6.28345	8.4696	7.7288	7.33784	9.34394	7.20585	7.84541	1.62868	0.844003	0.574823	0.771178	0.839625	0.918479	0.113649	0.207315	0.339017
P99024	7.9614	6.43355	6.74063	9.89328	9.59443	9.00062	12.4494	10.3243	9.69685	7.04519	9.49611	10.8235	0.808173	0.454378	1.44257	1.34789	1.5363	0.877361	0.0101936	0.0167092	0.203111
P28653	8.03738	5.71877	4.59754	5.8698	5.3512	7.12575	6.6285	4.06063	4.21833	6.1179	6.11558	4.96915	1.75431	0.912445	1.4392	0.999622	0.812232	1.23071	0.998479	0.430072	0.308665
P07356	8.09369	7.54752	7.56587	7.41694	8.75392	7.55209	6.45567	7.08289	5.98456	7.73569	7.90765	6.50771	0.31017	0.736	0.551012	1.02223	0.841257	1.21512	0.728133	0.0282071	0.0577421
Q04857	8.27023	6.71772	7.32891	5.4621	5.43784	5.45191	5.64446	5.4769	4.68055	7.43895	5.45062	5.2673	0.782084	0.0121785	0.515	0.732713	0.708071	1.0348	0.0116643	0.0159066	0.571012
P17751	8.28514	13.217	9.93666	4.84838	7.09399	4.64822	4.64646	6.29134	5.27132	10.4796	5.53019	5.40304	2.51038	1.35798	0.830313	0.52771	0.515576	1.02353	0.039801	0.0292298	0.896639
P07758	8.4704	6.22898	5.92051	11.2691	11.241	10.1602	8.38596	11.4738	11.3642	6.87329	10.8901	10.408	1.39171	0.632267	1.75201	1.5844	1.51427	1.04632	0.0104064	0.0521069	0.677163
O08677	8.69383	5.99195	5.61406	10.9546	16.4064	10.8292	9.15852	11.8301	11.5218	6.76661	12.7301	10.8368	1.67968	3.18442	1.46157	1.8813	1.60151	1.17471	0.0455164	0.0339808	0.402305
P03930	8.74975	12.1377	11.4551	5.74408	7.08526	5.1144	6.31441	6.53323	4.71729	10.7809	5.98124	5.85498	1.79179	1.00661	0.991325	0.554802	0.54309	1.02157	0.01554	0.0140712	0.884476
Q9R1Q7	8.93099	7.8145	8.1701	12.655	9.65776	10.9385	9.35847	9.87215	8.38616	8.3052	11.0837	9.20559	0.570372	1.50387	0.754696	1.33455	1.10841	1.20402	0.0402532	0.17458	0.125337
P11438	9.31092	6.10263	6.08642	5.56209	6.64578	5.74802	4.7423	6.42953	5.14021	7.16666	5.9853	5.43734	1.857	0.579501	0.88199	0.835159	0.7587	1.10078	0.352216	0.218852	0.419327
P19001	9.32374	9.31356	9.48164	6.46253	4.40869	7.25352	8.57695	7.68093	5.08663	9.37298	6.04158	7.11484	0.0942408	1.46839	1.81271	0.644574	0.759079	0.849152	0.0172256	0.0974606	0.470155
Q02788	9.43621	7.17844	7.856	5.84702	5.98487	5.68203	5.66148	5.22727	4.67793	8.15688	5.83797	5.18889	1.15857	0.151619	0.492895	0.715711	0.636137	1.12509	0.0263556	0.0150617	0.0947365
P14069	10.0635	8.61281	8.72034	11.1466	10.7931	10.8137	7.66034	7.66499	6.87413	9.13221	10.9178	7.39982	0.808292	0.198379	0.455268	1.19553	0.8103	1.47541	0.0205463	0.0318404	0.000253402
Q922U2	10.6165	9.61707	9.68451	7.68273	8.01807	8.5772	7.54733	7.76154	7.12264	9.97268	8.09267	7.47717	0.558552	0.451875	0.325175	0.811484	0.749765	1.08232	0.0105583	0.00259972	0.128015
P20152	13.4895	9.20828	10.1662	7.22332	6.23163	8.45309	11.4389	9.41124	9.51709	10.9547	7.30268	10.1224	2.24686	1.11285	1.14134	0.666628	0.924028	0.721437	0.0651661	0.597938	0.0375201
Q9JK53	16.9233	14.0132	14.3374	12.0704	20.5754	14.1494	9.5949	11.412	7.75448	15.0913	15.5984	9.58713	1.59481	4.43382	1.82877	1.0336	0.635276	1.62701	0.861197	0.0171185	0.0957172
O54974	17.5097	15.0396	15.6598	17.0794	20.4817	19.5218	13.8613	17.3529	15.2904	16.0697	19.0276	15.5016	1.28508	1.7542	1.75537	1.18407	0.964647	1.22747	0.0779977	0.674489	0.0696155
A0A0A6YW67	20.6698	19.5142	18.8572	19.6321	15.5622	21.7383	17.9124	17.5896	15.1957	19.6804	18.9775	16.8992	0.9177	3.13964	1.48411	0.964286	0.858681	1.12298	0.72864	0.0508133	0.358479
P60710	22.0986	30.6112	29.4462	25.4526	25.099	21.5868	19.3752	22.2448	16.923	27.3853	24.0461	19.5143	4.61535	2.13713	2.66364	0.878066	0.712583	1.23223	0.318973	0.0627478	0.0830787
Q9D3D9	25.9491	28.6415	32.1314	14.8458	20.0816	13.3292	15.0936	15.5666	14.9932	28.9074	16.0855	15.2178	3.09974	3.54279	0.306209	0.556451	0.526434	1.05702	0.00918734	0.00159848	0.694283
Q8CDK1	34.2476	51.754	46.6625	37.301	43.7473	31.5417	33.9284	33.7698	35.5741	44.2214	37.53	34.4241	9.00487	6.10604	0.999112	0.848684	0.778449	1.09022	0.346791	0.134368	0.433656
